# Supplementary material for: Atom-economical and workup-free multiparticipation of p-TsOH in yne-ynamide skeletal reshuffle: access to regiospecific, chemospecific, and stereospecific (E)-alkenyl sulfonate/ketone-tethered indoles
Source: Royal Society of Chemistry journal article supplement (doi:10.1039/d4gc05876c), 2024-12-13
Supplement: d4gc05876c1.pdf [file d4gc05876c1.pdf]

## Supporting Information

For

# **Atom-economical and workup-free multiparticipation of *p*-TsOH in yne-ynamides skeletal reshuffle: access to regiospecific, chemospecific, and stereospecific (*E*)-alkenyl sulfonate/ketone–tethered indoles**

Mohana Reddy Mutra,<sup>a</sup> T. L. Chandana,<sup>a</sup> and Jeh-Jeng Wang<sup>\*a,b</sup>

<sup>a</sup>Department of Medicinal and Applied Chemistry, Kaohsiung Medical University, No. 100, Shih-Chuan 1<sup>st</sup> Rd, Sanmin District, Kaohsiung City, 807 (Taiwan).

<sup>b</sup>Department of Medical Research, Kaohsiung Medical University Hospital, No. 100, Tzyou 1<sup>st</sup> Rd, Sanmin District, Kaohsiung City, 807 (Taiwan).

E-mail: [jjwang@kmu.edu.tw](mailto:jjwang@kmu.edu.tw)

## Table of Contents

|                                                                                                                        |           |
|------------------------------------------------------------------------------------------------------------------------|-----------|
| <b>1. General Information</b>                                                                                          | S3        |
| <b>2. Preparation of Starting Materials</b>                                                                            | S4-S5     |
| <b>3. Control experiments</b>                                                                                          | S6-S8     |
| <b>4. Experimental Procedures</b>                                                                                      | S9-S12    |
| <b>5. Gram-scale synthesis and evaluation of green chemistry-metrics<br/>in the synthesis of 3a</b>                    | S12       |
| <b>6. Characterization data</b>                                                                                        | S13-S22   |
| <b>7. References</b>                                                                                                   | S23       |
| <b>8. Copies of <math>^1\text{H}</math>, and <math>^{13}\text{C}</math> spectra of the newly synthesized compounds</b> | S24-S101  |
| <b>9. Check CIF Files</b>                                                                                              | S102-S116 |

## 1. General Information

$^1\text{H}$  and  $^{13}\text{C}$  NMR spectra were recorded on a 400 MHz Varian Unity Plus or Varian Mercury plus spectrometer. The chemical shift ( $\delta$ ) values are reported in parts per million (ppm), and the coupling constants ( $J$ ) are given in Hz. The spectra were recorded using  $\text{CDCl}_3$  as a solvent.  $^1\text{H}$  NMR chemical shifts are referenced to tetramethylsilane (TMS) (0 ppm).  $^{13}\text{C}$ NMR was referenced to  $\text{CDCl}_3$  (77.0 ppm). The abbreviations used are as follows: s, singlet; d, doublet; t, triplet; q, quartet; dd, doublet of doublet; ddd, doublet of doublet; dt, doublet of triplets; td, a triplet of doublet; m, multiplet; brs, broad singlet and so on. Mass spectra and high-resolution mass spectra (HRMS) were measured using the LTQ Orbitrap XL (Thermo Fisher Scientific) Liquid chromatography-mass spectrometry at National Taiwan Normal University and National Sun Yat-sen University. All commercially available reagents were used without further purification unless noted otherwise. Commercially available reagents and solvents were obtained from Sigma-Aldrich, TCI, Acros, or Alfa Aesar. Melting points were determined on an EZ-Melt (Automated melting point apparatus). All the synthesized products showed  $^1\text{H}$ NMR spectra in agreement with the assigned structures. Reaction progress and product mixtures were routinely monitored by TLC using Merck TLC aluminum sheets (silica gel 60 F254). Column chromatography was carried out with 230-400 mesh silica gel 60 (Merck) using a mixture of hexane/ethyl acetate as the eluent.

## 2. Preparation of Starting Materials

### 2.1. General procedure (A) for the preparation of 4-methyl-N-(phenylethynyl)-N-(2-(phenylethynyl)phenyl)benzenesulfonamide (1a)<sup>1</sup>

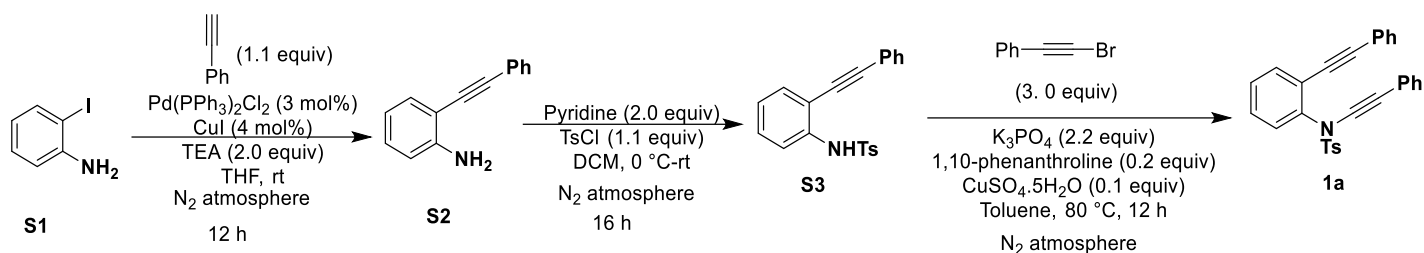

#### 2.1a. Procedure for the synthesis of 2-(phenylethynyl)aniline (S2)

To a dried schlenk flask equipped with a stir bar was charged with 2-iodoaniline (10 g, 45.65 mmol, 1.0 equiv) in THF. Next, the schlenk flask was evacuated and filled with nitrogen (three cycles), alkyne (5.12 g, 50.22 mmol, 1.1 equiv), freshly distilled Et<sub>3</sub>N (9.24 g, 91.31 mmol, 2.0 equiv), Pd(PPh<sub>3</sub>)<sub>2</sub>Cl<sub>2</sub> (0.96 g, 1.3697 mmol, 3 mol%) and CuI (0.34 g, 1.82 mmol, 4 mol%) were added under the nitrogen atmosphere. The resulting mixture was stirred at room temperature for 12 h. After the completion of the reaction by TLC, the reaction mixture was cooled to room temperature, diluted with water, and extracted with ethyl acetate. The combined organic layer was dried over Na<sub>2</sub>SO<sub>4</sub>, filtered, and concentrated to give the crude material. The crude material was purified by column chromatography using hexane-ethyl acetate (95:5%) as the eluent gave yellow solid 2-(phenylethynyl)aniline in 85% (7.50 g).

#### 2.1b. Procedure for the synthesis of 4-methyl-N-(2-(phenylethynyl)phenyl)benzenesulfonamide (S3)

To a dried schlenk flask equipped with a stir bar was charged with 2-(phenylethynyl)aniline (7 g, 36.22 mmol, 1.0 equiv) in DCM at 0 °C. Next, the schlenk flask was evacuated and filled with nitrogen (three cycles) followed by pyridine (5.73 g, 72.45 mmol, 2.0 equiv) and 4-methylbenzenesulfonyl chloride (7.59 g, 39.84 mmol, 1.1 equiv: The TsCl was added portion wise in 20 minutes) were added under nitrogen atmosphere. The resulting mixture was continued at room temperature for 16 h (if starting material was not consumed, heated at 40 °C (oil bath)). The solvent was removed under reduced pressure and the resulting solid was dissolved in DCM, washed with water and brine, and dried over MgSO<sub>4</sub>. The crude material was purified by column chromatography using hexane-ethyl acetate (90:10%) as the eluent gave yellow solid 4-methyl-N-(2-(phenylethynyl)phenyl)benzenesulfonamide in 63% (8.23 g).

#### 2.1c. Procedure for the synthesis of 4-methyl-N-(phenylethynyl)-N-(2-(phenylethynyl)phenyl)benzenesulfonamide derivatives (1a)

To a dried flask was added 4-methyl-*N*-(2-(phenylethynyl)phenyl) (4 g, 11.52 mmol, 1.0 equiv), CuSO<sub>4</sub>·5H<sub>2</sub>O (288 mg, 1.15 mmol, 0.1 equiv), 1,10-phenanthroline (414 mg 2.30 mmol, 0.2 equiv), and K<sub>3</sub>PO<sub>4</sub> (5.38 g, 25.36 mmol, 2.2 equiv) in dry toluene. Next, the flask was evacuated and filled with nitrogen (three cycles) followed by addition of bromoalkyne (6.25 g, 34.58 mmol, 3.0 equiv) (note: need to prepare freshly before performing the reaction) and the mixture was stirred at 80 °C 12 h (Note: need vigorous stirring). The resulting mixture was filtered through silica gel and then concentrated in vacuum. The residue was purified by flash column chromatography on silica gel (Formation of the ynamide and side product; indole) is very close on TLC, so need to pack long silica and required long run) with hexane-ethyl acetate (99:1). A pale-yellow solid was obtained and washed with HPLC grade n-pentane gave the pure brown solid 4-methyl-*N*-(phenylethynyl)-*N*-(2-(phenylethynyl)phenyl)benzenesulfonamide (3 g, 58%).

Note: Other ynamide derivatives were obtained (300 mg scale of respective **S3** starting material) through the procedure reported above. Compounds known in the literature were confirmed by comparing their <sup>1</sup>H and <sup>13</sup>C NMR spectra.<sup>1</sup> The list of yne-ynamide (**1a-1x**) used in this transformation are shown below.

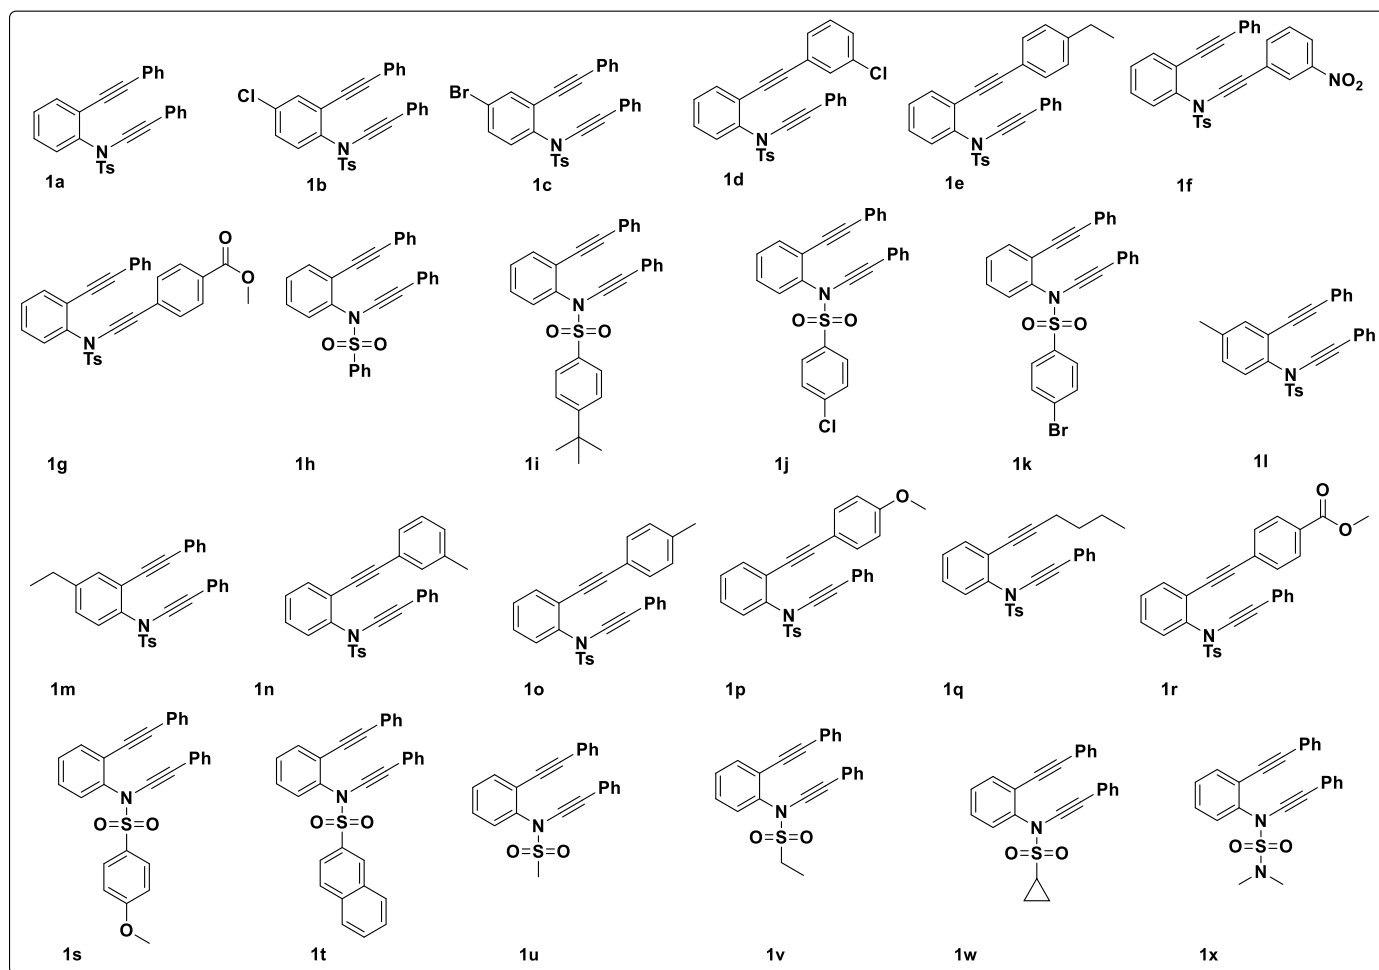

**Table S1.** Yne-ynamide synthesized and used in our transformations (**1a-1x**).

### 3. Control experiments

#### Investigation of the possible reaction intermediate with the help of LCMS.

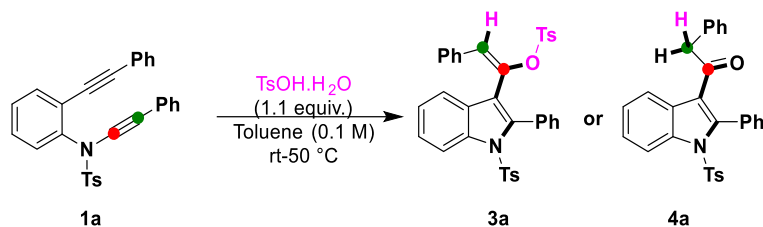

In a 15 mL dried Schlenk tube, 4-methyl-*N*-(phenylethynyl)-*N*-(2-(phenylethynyl)phenyl)benzenesulfonamide (45 mg, 0.10 mmol, 1.0 equiv), *p*-Toluenesulfonic acid monohydrate (21 mg, 0.11 mmol, 1.1 equiv), toluene were added in sequence and stirred at room temperature for 1 h. And the resulting reaction mixture was stirred at 50 °C for respective time. With different interval of the reaction time, the reaction crude was submitted to LCMS for analysis. From these outcome there may be formation of potential intermediates one of the intermediates (**I/II/ III** or **V**) due to the same molecular mass for all intermediates. The LCMS spectra are as follows.

D:\data\yu\MC-20-42-1.raw

11/15/2024 4:11:12 PM

MC-20-42-1 #18 RT: 0.12 AV: 1 NL: 2.42E7

T: FTMS + p ESI Full ms [100.0000-1000.0000]

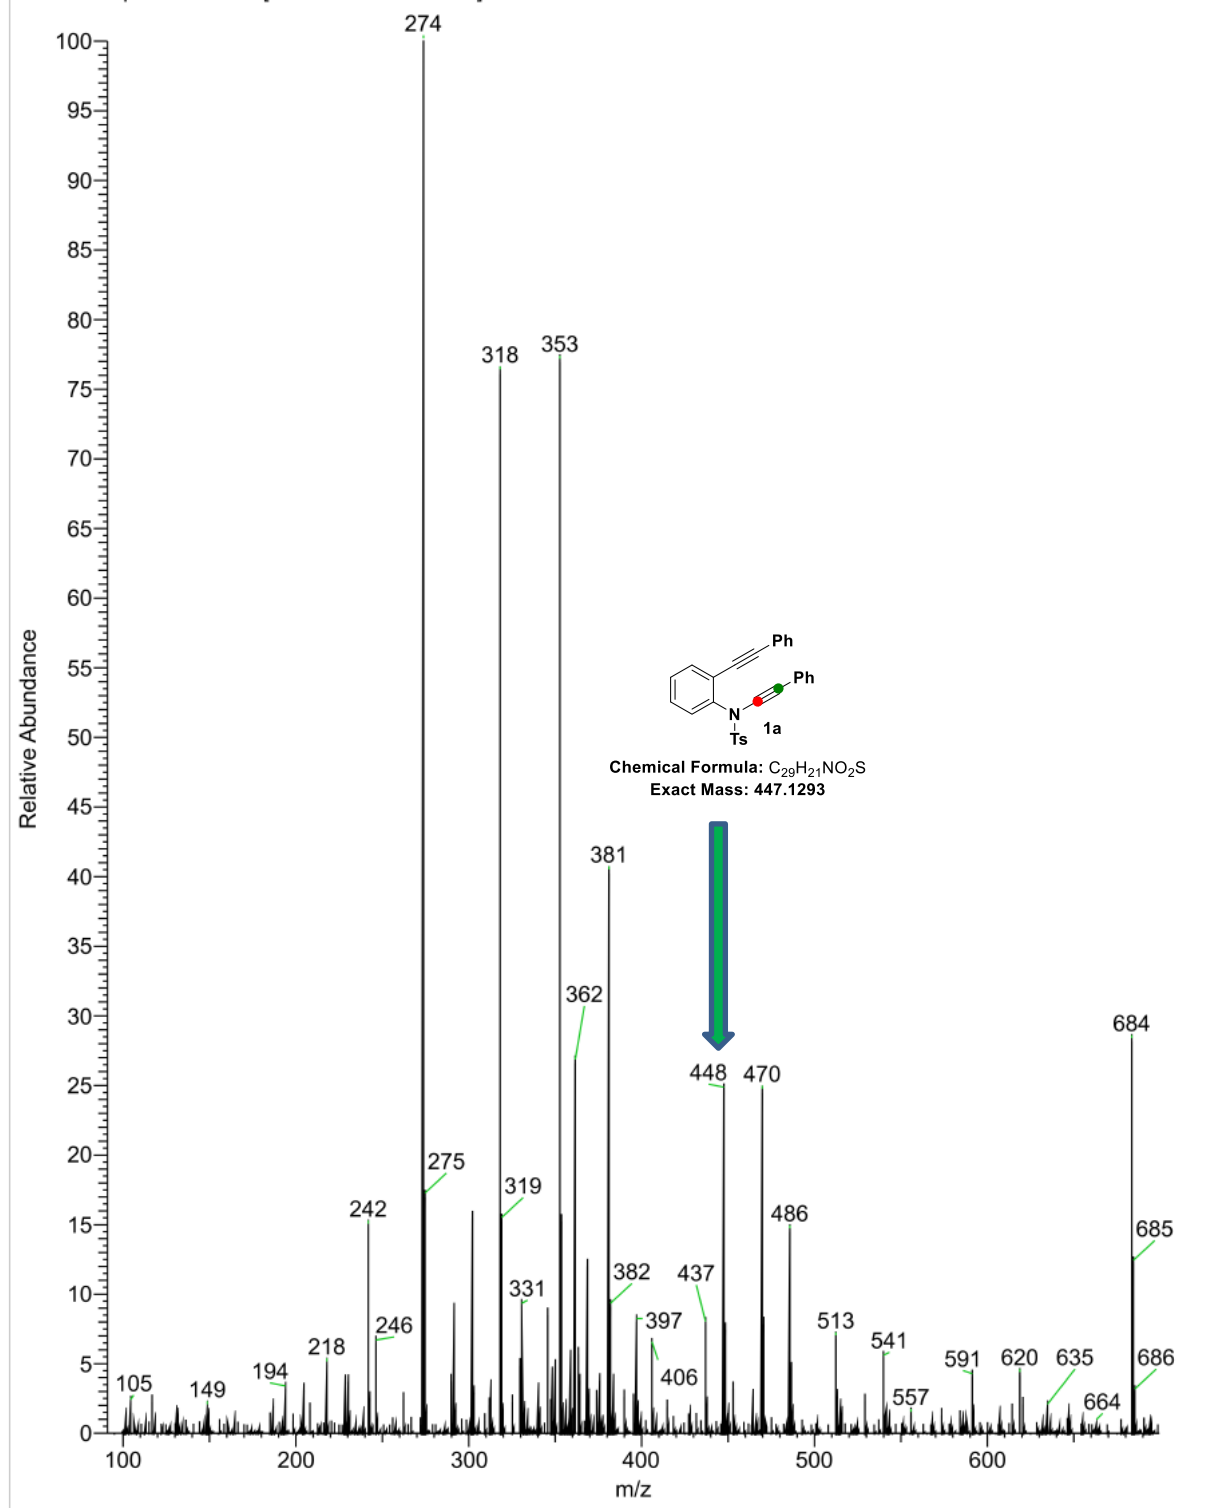

**Table S2.** LCMS spectra for crude reaction mixture after 1 h at room temperature.

D:\data\yu\MC-20-42-2A.raw

11/15/2024 4:12:25 PM

MC-20-42-2A #18 RT: 0.12 AV: 1 NL: 1.23E8

T: FTMS + p ESI Full ms [100.0000-1000.0000]

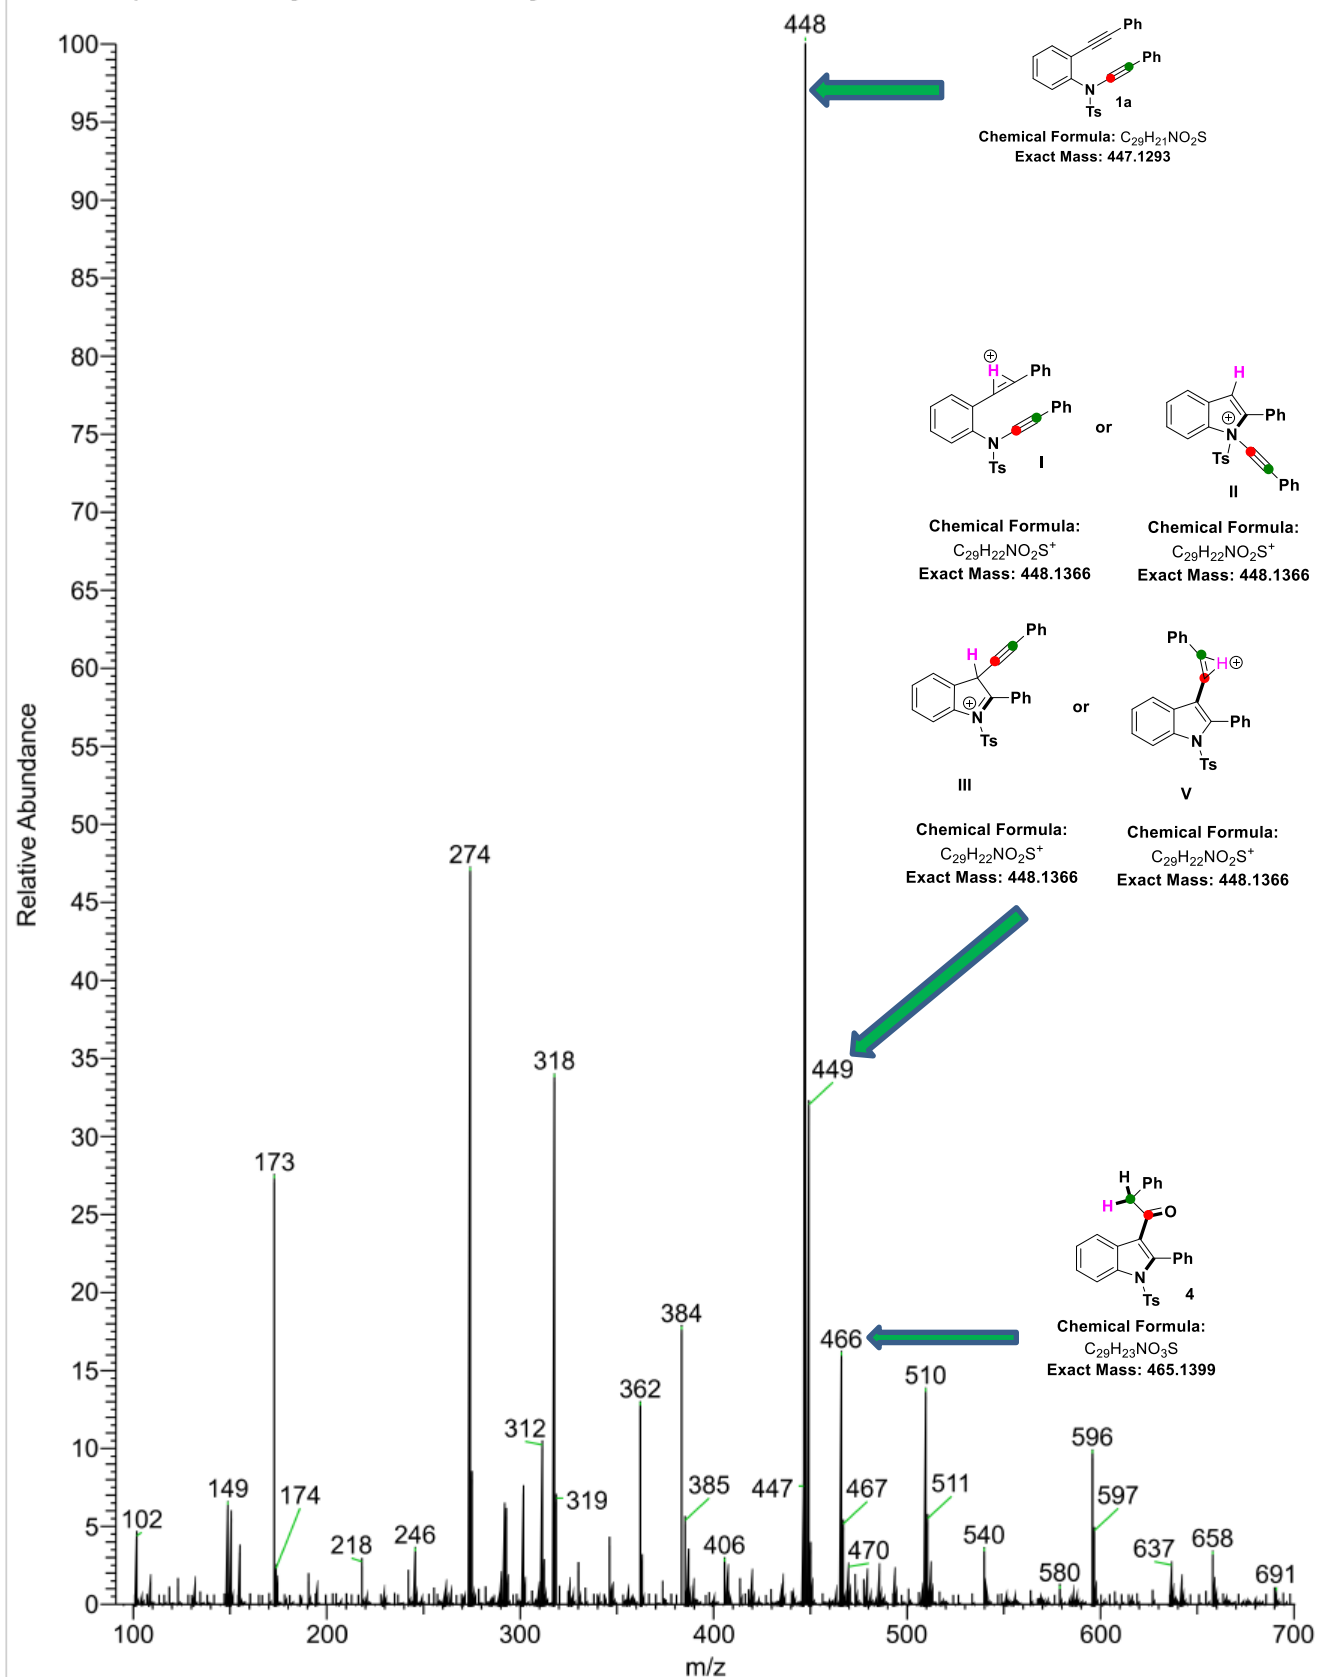

Table S3. LCMS spectra for crude reaction mixture after 1 h at 50°C.



## 4. Experimental procedures

### 4.1. General procedure (A) for the synthesis of (*E*)-2-phenyl-1-(2-phenyl-1-tosyl-indol-3-yl)vinyl 4-methylbenzenesulfonate derivatives (3a-3k)

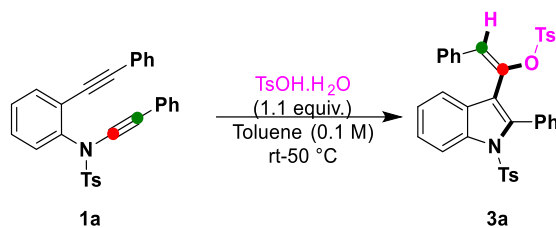

In a 15 mL dried Schlenk tube, 4-methyl-*N*-(phenylethynyl)-*N*-(2-(phenylethynyl)phenyl)benzenesulfonamide (45 mg, 0.10 mmol, 1.0 equiv), *p*-Toluenesulfonic acid monohydrate (21 mg, 0.11 mmol, 1.1 equiv), toluene were added in sequence. The resulting reaction mixture was stirred at 50 °C for respective time. The progress of reaction was monitored by TLC. After the reaction was complete, the reaction mixture was concentrated by rotary evaporation and purified by flash column chromatography using hexane-ethyl acetate (92:8) as the eluent gave the desired product (*E*)-2-phenyl-1-(2-phenyl-1-tosyl-indol-3-yl)vinyl 4-methylbenzenesulfonate as a white solid in 79% (49 mg).

### 4.2. General procedure (B) for the synthesis of 2-phenyl-1-(2-phenyl-1-tosyl-indol-3-yl)ethan-1-one derivatives (4a-4v)

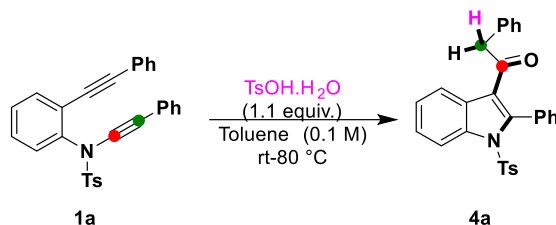

In a 15 mL dried Schlenk tube, 4-methyl-*N*-(phenylethynyl)-*N*-(2-(phenylethynyl)phenyl)benzenesulfonamide (45 mg, 0.10 mmol, 1.0 equiv), *p*-toluenesulfonic acid monohydrate (21 mg, 0.11 mmol, 1.1 equiv), toluene were added in sequence. The resulting reaction mixture was stirred at 80 °C for respective time. The progress of reaction was monitored by TLC. After the reaction was complete, the reaction mixture was concentrated by rotary evaporation and purified by flash column chromatography using hexane-ethyl acetate (93:7) as the eluent gave the desired product 2-phenyl-1-(2-phenyl-1-tosyl-indol-3-yl)ethan-1-one as a white solid in 80% (38 mg).

### 4.3. Gram-scale synthesis

#### 4.3a. Gram-scale synthesis of (*E*)-2-phenyl-1-(2-phenyl-1-tosyl-indol-3-yl)vinyl 4-methylbenzenesulfonate (3a)

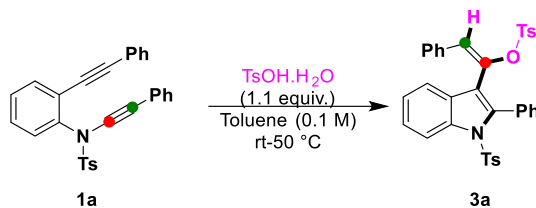

In a 50 mL dried Schlenk tube, 4-methyl-*N*-(phenylethynyl)-*N*-(2-(phenylethynyl)phenyl)benzenesulfonamide (1.0 g, 2.23 mmol, 1.0 equiv), *p*-toluenesulfonic acid monohydrate (467 mg, 2.45 mmol, 1.1 equiv), Toluene were added in sequence. The resulting reaction mixture was stirred at 50 °C for respective time. The progress of reaction was monitored by TLC. After the reaction completion, the solvent (toluene) was recovered by rotary evaporator in 94% (21.0 mL) at 45°C water bath temperature and concentrated reaction mixture purified by flash column chromatography using hexane-ethyl acetate (92:8) as the eluent gave the desired product (*E*)-2-phenyl-1-(2-phenyl-1-tosyl-indol-3-yl)vinyl 4-methylbenzenesulfonate as a white solid in 75% (1.04 g).

#### 4.3b. Gram-scale synthesis of 2-phenyl-1-(2-phenyl-1-tosyl-indol-3-yl)ethan-1-one (4a)

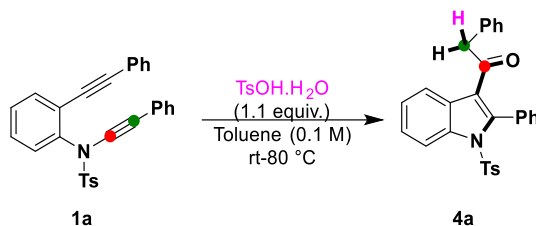

In a 50 mL dried Schlenk tube, 4-methyl-*N*-(phenylethynyl)-*N*-(2-(phenylethynyl)phenyl)benzenesulfonamide (1.0 g, 2.23 mmol, 1.0 equiv), *p*-toluenesulfonic acid monohydrate (467 mg, 2.45 mmol, 1.1 equiv), Toluene were added in sequence. The resulting reaction mixture was stirred at 80 °C for respective time. The progress of reaction was monitored by TLC. After the reaction completion, the reaction mixture was concentrated by rotary evaporation and purified by flash column chromatography using hexane-ethyl acetate (93:7) as the eluent gave the desired product 2-phenyl-1-(2-phenyl-1-tosyl-indol-3-yl)ethan-1-one as a white solid in 78% (810 mg).

#### 4.4. Synthesis of 2-phenyl-1-(2-phenyl-1-tosyl-indol-3-yl)ethan-1-ol (5) (procedure (C))

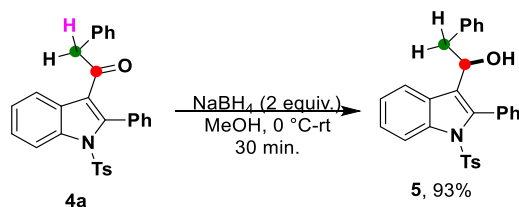

In a 15 mL dried Schlenk tube, 2-phenyl-1-(2-phenyl-1-tosyl-indol-3-yl)ethan-1-one (70 mg, 0.15 mmol, 1.0 equiv) in anhydrous MeOH (4 mL) was slowly added sodium borohydride (12 mg, 0.30 mmol) at 0°C. The resulting reaction mixture was stirred for 30 min at room temperature. The progress of reaction was monitored

by TLC. After the reaction completion, the reaction mixture was concentrated by rotary evaporation and purified by flash column chromatography using hexane-ethyl acetate (86:14) as the eluent gave the desired product 2-phenyl-1-(2-phenyl-1-tosyl-indol-3-yl)ethan-1-ol as a white solid in 93% (66 mg).

#### 4.5. Synthesis of 4-methyl-*N'*-(2-phenyl-1-(2-phenyl-1-tosyl-indol-3-yl)ethylidene)benzenesulfonohydrazide (6) (procedure (D))

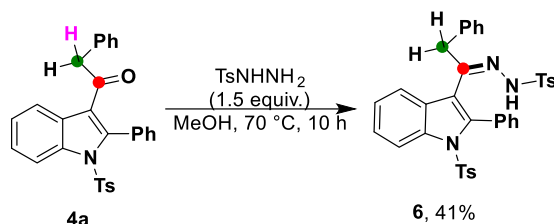

In a 15 mL dried Schlenk tube, solution of 2-phenyl-1-(2-phenyl-1-tosyl-indol-3-yl)ethan-1-one (70 mg, 0.15 mmol, 1.0 equiv) in anhydrous MeOH (4 ml) was added *p*-toluenesulfonyl hydrazide (42 mg, 0.22 mmol). The resulting reaction mixture was stirred at 70 °C for 10 h. The progress of reaction was monitored by TLC. After the reaction completion, the reaction mixture was concentrated by rotary evaporation and purified by flash column chromatography using hexane-ethyl acetate (85:14) as the eluent gave the desired product 4-methyl-*N'*-(2-phenyl-1-(2-phenyl-1-tosyl-indol-3-yl)ethylidene)benzenesulfonohydrazide as a white solid in 41% (39 mg).

#### 4.6. Synthesis of 2-phenyl-1-(2-phenyl-1-tosyl-indol-3-yl)ethan-1-one oxime (7) (procedure (E))

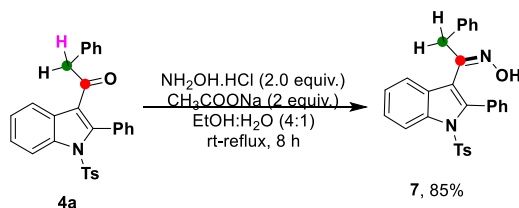

A suspension of hydroxylamine hydrochloride (21 mg, 0.30 mmol, 2.0 equiv), and NaOAc (25 mg, 0.30 mmol, 2.0 equiv) in ethanol:water (4:1) was stirred at room temperature for 30 min. To this solution, 2-phenyl-1-(2-phenyl-1-tosyl-indol-3-yl)ethan-1-one (70 mg, 0.15 mmol, 1.0 equiv) was added and the reaction mixture was heated refluxed for 8 h. After the reaction completion by TLC, the reaction mass was cooled to rt followed by removal of excess ethanol under vacuum. Then the reaction mixture was diluted with water, extracted with ethyl acetate and evaporated under vacuum to get crude product. The crude material was purified by flash column chromatography using hexane-ethyl acetate (80:20) as the eluent gave product 2-phenyl-1-(2-phenyl-1-tosyl-indol-3-yl)ethan-1-one oxime as a white solid in 85% (62 mg).

#### 4.7. Synthesis of 1-phenyl-2-(2-phenyl-indol-3-yl)ethane-1,2-dione (8) (procedure (F))

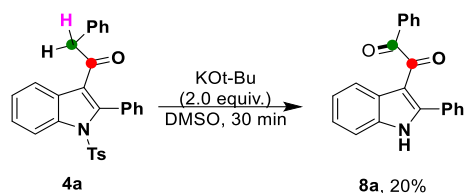

An oven-dried screw-capped, 8 mL vial equipped with a magnetic stir bar was charged with 2-phenyl-1-(2-phenyl-1-tosyl-indol-3-yl)ethan-1-one (70 mg, 0.15 mmol, 1.0 equiv.) in dimethyl sulfoxide (0.1 M) and potassium *tert*-butoxide (KOt-Bu) (17 mg, 0.30 mmol, 2.0 equiv.) was added. The resulting solution was stirred up to starting material completion (30 minutes) at room temperature. The progress of reaction was monitored by TLC. After that, the crude reaction mixture was diluted with water and saturated solution of sodium chloride and extracted with ethyl acetate. The organic layer was dried over Na<sub>2</sub>SO<sub>4</sub>, filtered, and concentrated. The crude material was purified by flash column chromatography using hexane-ethyl acetate (86:14) as the eluent gave the desired product 1-phenyl-2-(2-phenyl-indol-3-yl)ethane-1,2-dione as a white solid in 20% (10 mg).

### 5. Gram-scale synthesis and evaluation of green chemistry metrics in the synthesis of 3a

|                                                                                                                                                                                                   |                                                                                                             |                                                                                                          |
|---------------------------------------------------------------------------------------------------------------------------------------------------------------------------------------------------|-------------------------------------------------------------------------------------------------------------|----------------------------------------------------------------------------------------------------------|
|                                                                                                                                                                                                   | <p>Toluene recovered;<br/>21.0 mL (94%)<br/>by rotary evaporator<br/>at 45°C water bath<br/>temperature</p> |                                                                                                          |
| <p>1a<br/>1.0 g, 2.23 mmol<br/>C<sub>29</sub>H<sub>21</sub>NO<sub>2</sub>S; 447.55</p>                                                                                                            | <p>2a<br/>0.467 g, 2.45 mmol<br/>C<sub>7</sub>H<sub>10</sub>O<sub>4</sub>S; 190.21</p>                      | <p>3a, 75%<br/>1.04 g, 1.79 mmol<br/>C<sub>36</sub>H<sub>29</sub>NO<sub>5</sub>S<sub>2</sub>; 619.75</p> |
| <p>Atom Economy (%) = <math>\frac{\text{Molecular weight of desired product}}{\text{Molecular weight of all reactants}} \times 100 = \frac{619.75}{447.55 + 190.21} \times 100 = 97.17</math></p> |                                                                                                             |                                                                                                          |
| <p>Atom Efficiency (%) = <math>\frac{(\% \text{ yield of product} \times \% \text{ atom economy})}{100} = \frac{(75 \times 97.17)}{100} = 72.87</math></p>                                        |                                                                                                             |                                                                                                          |
| <p>Carbon Efficiency (%) = <math>\frac{\text{Total amount of carbons in product}}{\text{Total amount of carbons in all reactants}} \times 100 = \frac{36}{29+7} \times 100 = 100</math></p>       |                                                                                                             |                                                                                                          |
| <p>Reaction Mass Efficiency (%) = <math>\frac{\text{Mass of isolated product}}{\text{Total mass of all reactants}} \times 100 = \frac{1.04}{1.0+0.467} \times 100 = 70.82</math></p>              |                                                                                                             |                                                                                                          |
| <p>E-factor = <math>\frac{\text{Total waste (g)}}{\text{Total product (g)}} = \frac{(1.0+0.467+22.3)-(1.04+21.0)}{1.04} = 1.72 \text{ g waste/Kg product}</math></p>                              |                                                                                                             |                                                                                                          |

**Table S4.** Gram-scale synthesis and evaluation of green chemistry metrics in the synthesis of 3a.

## 6. Characterization data

**(E)-2-phenyl-1-(2-phenyl-1-tosyl-indol-3-yl)vinyl 4-methylbenzenesulfonate (3a):** The title compound was

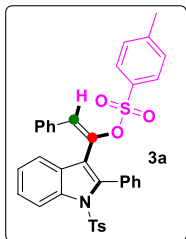

prepared according to the general procedure A via column chromatography of silica eluting hexane-ethyl acetate (92:8) to obtain as a white solid (49 mg, yield = 79%); Mp. 114-115 °C;  $^1\text{H}$  NMR (400 MHz,  $\text{CDCl}_3$ )  $\delta$  8.22 (d,  $J = 8.4$  Hz, 1H), 7.42 – 7.37 (m, 1H), 7.31 (ddd,  $J = 8.5$ , 7.1, 1.4 Hz, 2H), 7.29 – 7.20 (m, 6H), 7.13 – 7.01 (m, 6H), 6.95 (d,  $J = 7.9$  Hz, 2H), 6.90 – 6.85 (m, 2H), 6.69 (d,  $J = 7.2$  Hz, 2H), 6.66 (s, 1H), 2.33 (s, 3H), 2.32 (s, 3H).  $^{13}\text{C}$  NMR (101 MHz,  $\text{CDCl}_3$ )  $\delta$  144.9, 144.6, 141.0, 139.1, 137.2, 134.9, 133.1, 132.7, 130.0, 129.3, 129.2, 129.0, 128.4, 128.3, 128.1, 127.8, 127.7, 127.3, 126.9, 126.7, 125.3, 124.5, 120.8, 118.0, 116.5, 21.6, 21.5. HRMS (ESI) calcd for  $\text{C}_{36}\text{H}_{29}\text{O}_5\text{NNaS}_2$   $[\text{M}+\text{Na}]^+$  642.1379; found: 642.1376.

**(E)-1-(5-chloro-2-phenyl-1-tosyl-indol-3-yl)-2-phenylvinyl 4-methylbenzenesulfonate (3b):** The title

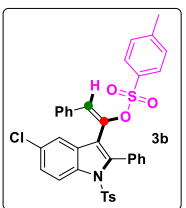

compound was prepared according to the general procedure A via column chromatography of silica eluting hexane-ethyl acetate (91:9) to obtain as a white solid (42 mg, yield = 63%); Mp. 142-143 °C;  $^1\text{H}$  NMR (400 MHz,  $\text{CDCl}_3$ )  $\delta$  8.14 (d,  $J = 8.9$  Hz, 1H), 7.42 – 7.32 (m, 2H), 7.31 – 7.21 (m, 7H), 7.15 – 7.05 (m, 4H), 6.99 (d,  $J = 8.0$  Hz, 2H), 6.91 (t,  $J = 7.8$  Hz, 2H), 6.86 (d,  $J = 2.1$  Hz, 1H), 6.64 (d,  $J = 5.9$  Hz, 3H), 2.35 (s, 3H), 2.32 (s, 3H).  $^{13}\text{C}$  NMR (101 MHz,  $\text{CDCl}_3$ )  $\delta$  145.2, 144.9, 142.2, 138.7, 135.3, 134.7, 132.9, 132.5, 130.2, 129.6, 129.5, 129.4, 129.1, 128.3, 128.2, 127.9, 127.8, 127.3, 126.9, 126.8, 125.4, 120.1, 117.4, 21.6, 21.6. HRMS (ESI) calcd for  $\text{C}_{36}\text{H}_{28}\text{O}_5\text{NCINaS}_2$   $[\text{M}+\text{Na}]^+$  676.0989; found: 676.0986.

**(E)-1-(5-bromo-2-phenyl-1-tosyl-indol-3-yl)-2-phenylvinyl 4-methylbenzenesulfonate (3c):** The title

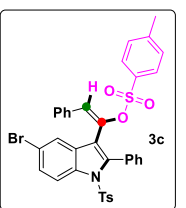

compound was prepared according to the general procedure A via column chromatography of silica eluting hexane-ethyl acetate (91:9) to obtain as a white solid (51 mg, yield = 73%); Mp. 139-140 °C;  $^1\text{H}$  NMR (400 MHz,  $\text{CDCl}_3$ )  $\delta$  8.10 – 8.07 (m, 1H), 7.43 – 7.33 (m, 3H), 7.30 – 7.24 (m, 5H), 7.24 – 7.16 (m, 1H), 7.15 – 7.06 (m, 4H), 7.02 (d,  $J = 1.7$  Hz, 1H), 6.99 (d,  $J = 8.0$  Hz, 2H), 6.91 (t,  $J = 7.8$  Hz, 2H), 6.66-6.62 (m, 3H), 2.35 (s, 3H), 2.32 (s, 3H).  $^{13}\text{C}$  NMR (101 MHz,  $\text{CDCl}_3$ )  $\delta$  145.3, 144.9, 142.1, 138.7, 135.7, 134.8, 133.0, 132.5, 130.0, 129.5, 129.4, 129.3, 129.1, 128.2, 128.2, 128.0, 127.9, 127.8, 127.3, 126.9, 126.7, 123.1, 118.0, 117.7, 116.7, 21.6, 21.6. HRMS (ESI) calcd for  $\text{C}_{36}\text{H}_{28}\text{O}_5\text{NBrNaS}_2$   $[\text{M}+\text{Na}]^+$  720.0484; found: 720.0481.

**(E)-1-(2-(4-ethylphenyl)-1-tosyl-indol-3-yl)-2-phenylvinyl 4-methylbenzenesulfonate (3d):** The title

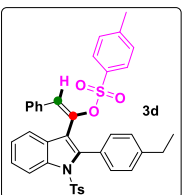

compound was prepared according to the general procedure A via column chromatography of silica eluting hexane-ethyl acetate (92:8) to obtain as a white solid (42 mg, yield = 64%); Mp. 149-150 °C;  $^1\text{H}$  NMR (400 MHz,  $\text{CDCl}_3$ )  $\delta$  8.22 (d,  $J = 8.4$  Hz, 1H), 7.46 – 7.39 (m, 3H), 7.39 – 7.35 (m, 2H), 7.33 – 7.27 (m, 3H), 7.26 – 7.20 (m, 4H), 7.19 – 7.16 (m, 3H), 7.12 (ddd,  $J = 15.2$ , 7.1, 1.9 Hz, 3H), 6.73 (d,  $J = 8.0$  Hz, 2H), 5.82 (s, 1H), 2.76 (q,  $J = 7.6$  Hz, 2H), 2.33 (s, 3H), 2.23 (s, 3H),

1.33 (t,  $J = 7.6$  Hz, 3H).  $^{13}\text{C}$  NMR (101 MHz,  $\text{CDCl}_3$ )  $\delta$  145.3, 144.9, 144.5, 139.1, 138.8, 135.6, 133.2, 133.0, 131.5, 129.4, 129.1, 128.8, 128.7, 128.2, 127.9, 127.4, 127.1, 124.8, 124.6, 124.0, 120.5, 115.5, 28.8, 21.6, 21.4, 15.4. HRMS (ESI) calcd for  $\text{C}_{38}\text{H}_{33}\text{O}_5\text{NNaS}_2$   $[\text{M}+\text{Na}]^+$  670.1692; found: 670.1689.

**(E)-1-(2-(3-chlorophenyl)-1-tosyl-indol-3-yl)-2-phenylvinyl 4-methylbenzenesulfonate (3e):** The title

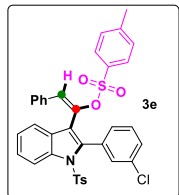

compound was prepared according to the general procedure A via column chromatography of silica eluting hexane-ethyl acetate (91:9) to obtain as a white solid (36 mg, yield = 55%); Mp. 69-70 °C;  $^1\text{H}$  NMR (400 MHz,  $\text{CDCl}_3$ )  $\delta$  8.24 (d,  $J = 8.3$  Hz, 1H), 7.41 – 7.24 (m, 7H), 7.23 – 7.01 (m, 9H), 6.90 (t,  $J = 7.1$  Hz, 2H), 6.62 (d,  $J = 7.4$  Hz, 2H), 6.55 (s, 1H), 2.37 (s, 3H), 2.34

(s, 3H).  $^{13}\text{C}$  NMR (101 MHz,  $\text{CDCl}_3$ )  $\delta$  145.1, 144.9, 139.1, 138.8, 137.3, 134.9, 133.2, 132.9, 132.61, 131.7, 129.5, 129.2, 128.9, 128.4, 128.2, 127.8, 126.8, 126.6, 125.6, 124.7, 120.9, 116.3, 21.6. HRMS (ESI) calcd for  $\text{C}_{36}\text{H}_{28}\text{O}_5\text{NCINaS}_2$   $[\text{M}+\text{Na}]^+$  676.0989; found: 676.0986.

**(E)-2-(3-nitrophenyl)-1-(2-phenyl-1-tosyl-indol-3-yl)vinyl 4-methylbenzenesulfonate (3f):** The title

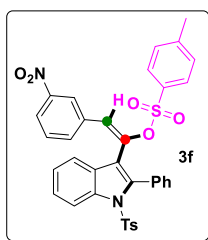

compound was prepared according to the general procedure A via column chromatography of silica eluting hexane-ethyl acetate (89:11) to obtain as a white solid (50 mg, yield = 74%); Mp. 68-69 °C;  $^1\text{H}$  NMR (400 MHz,  $\text{CDCl}_3$ )  $\delta$  8.25 (d,  $J = 8.5$  Hz, 1H), 7.89 (ddd,  $J = 8.2, 2.2, 1.0$  Hz, 1H), 7.50 – 7.48 (m, 1H), 7.39 – 7.31 (m, 4H), 7.31 – 7.23 (m, 4H), 7.15 – 7.12 (m, 2H), 7.12 – 7.07 (m, 3H), 7.04 (dd,  $J = 7.8, 7.0$  Hz, 3H), 6.96 (d,  $J = 7.8$  Hz, 1H), 6.59 (s, 1H),

2.36 (s, 3H), 2.31 (s, 3H).  $^{13}\text{C}$  NMR (101 MHz,  $\text{CDCl}_3$ )  $\delta$  145.1, 145.1, 134.9, 133.7, 130.7, 129.5, 129.5, 129.3, 129.1, 129.0, 127.8, 127.7, 127.3, 126.8, 125.5, 124.5, 123.2, 123.1, 122.1, 120.3, 116.2, 21.6, 21.6. HRMS (ESI) calcd for  $\text{C}_{36}\text{H}_{28}\text{O}_7\text{N}_2\text{NaS}_2$   $[\text{M}+\text{Na}]^+$  687.1230; found: 687.1226.

**methyl (E)-4-(2-(2-phenyl-1-tosyl-indol-3-yl)-2-(tosyloxy)vinyl)benzoate (3g):** The title compound was

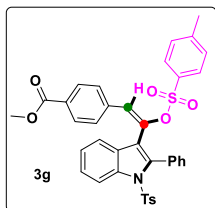

prepared according to the general procedure A via column chromatography of silica eluting hexane-ethyl acetate (90:10) to obtain as a white solid (51 mg, yield = 75%); Mp. 168-169 °C;  $^1\text{H}$  NMR (400 MHz,  $\text{CDCl}_3$ )  $\delta$  8.23 (d,  $J = 8.4$  Hz, 1H), 7.52 (d,  $J = 8.4$  Hz, 2H), 7.44 – 7.29 (m, 4H), 7.27 (d,  $J = 8.5$  Hz, 3H), 7.19 (d,  $J = 8.3$  Hz, 2H), 7.15 – 7.05 (m, 4H), 7.00 (d,

$J = 7.3$  Hz, 1H), 6.96 (d,  $J = 8.0$  Hz, 2H), 6.74 (d,  $J = 8.2$  Hz, 2H), 6.72 (s, 1H), 3.86 (s, 3H), 2.38 (s, 3H), 2.33 (s, 3H).  $^{13}\text{C}$  NMR (101 MHz,  $\text{CDCl}_3$ )  $\delta$  166.4, 145.2, 144.8, 141.2, 140.9, 137.4, 137.3, 134.7, 133.0, 129.9, 129.4, 129.4, 129.3, 129.0, 128.9, 128.2, 128.1, 127.7, 127.4, 126.9, 125.5, 125.5, 124.7, 120.5, 117.8, 116.7, 52.1, 21.5, 21.5. HRMS (ESI) calcd for  $\text{C}_{38}\text{H}_{31}\text{O}_7\text{NNaS}_2$   $[\text{M}+\text{Na}]^+$  700.1434; found: 700.1430.

**(E)-2-phenyl-1-(2-phenyl-1-(phenylsulfonyl)-indol-3-yl)vinyl 4-methylbenzenesulfonate (3h):** The title

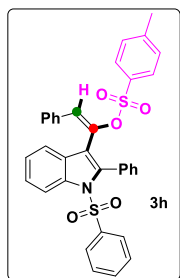

compound was prepared according to the general procedure A via column chromatography of silica eluting hexane-ethyl acetate (92:8) to obtain as a white solid (49 mg, yield = 80%); Mp. 129-130 °C;  $^1\text{H}$  NMR (400 MHz,  $\text{CDCl}_3$ )  $\delta$  8.23 (d,  $J = 8.4$  Hz, 1H), 7.53-7.49 (ddt,  $J = 8.7, 7.6, 1.3$ , 1H), 7.42 – 7.22 (m, 11H), 7.13 – 7.06 (m, 2H), 7.06 – 7.02 (m, 2H), 6.96 (d,  $J = 8.0$

Hz, 2H), 6.89 (t,  $J = 7.8$  Hz, 2H), 6.68 (d,  $J = 7.3$  Hz, 2H), 6.65 (s, 1H), 2.33 (s, 3H).  $^{13}\text{C}$  NMR (101 MHz,  $\text{CDCl}_3$ )  $\delta$  144.7, 140.9, 139.0, 137.8, 137.2, 133.8, 133.1, 132.7, 129.9, 129.2, 129.0, 128.7, 128.4, 128.3, 128.2, 127.8, 127.7, 127.3, 126.8, 126.8, 125.4, 124.6, 120.8, 118.1, 116.4, 21.6. HRMS (ESI) calcd for  $\text{C}_{35}\text{H}_{27}\text{O}_5\text{NNaS}_2$   $[\text{M}+\text{Na}]^+$  628.1222; found: 628.1220.

**(E)-1-(1-((4-*tert*-butyl)phenyl)sulfonyl)-2-phenyl-indol-3-yl)-2-phenylvinyl 4-methylbenzenesulfonate (3i):**

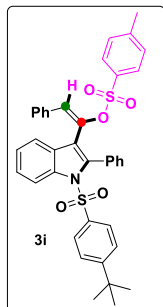

The title compound was prepared according to the general procedure A via column chromatography of silica eluting hexane-ethyl acetate (91:9) to obtain as a white solid (40 mg, yield = 60%); Mp. 137-138 °C;  $^1\text{H}$  NMR (400 MHz,  $\text{CDCl}_3$ )  $\delta$  8.23 (d,  $J = 8.4$  Hz, 1H), 7.38 – 7.23 (m, 11H), 7.12 – 7.01 (m, 4H), 6.95 – 6.87 (m, 4H), 6.71 (d,  $J = 6.8$  Hz, 1H), 6.62 (s, 1H), 2.32 (s, 3H), 1.24 (s, 9H).  $^{13}\text{C}$  NMR (101 MHz,  $\text{CDCl}_3$ )  $\delta$  157.8, 144.6, 140.7, 139.4, 137.1, 135.3, 133.2, 132.8, 129.9, 129.0, 128.3, 128.2, 128.2, 127.9, 127.6, 127.2, 126.8, 126.5, 125.8, 125.2, 124.3, 120.7, 116.2, 35.2, 30.9, 21.5. HRMS (ESI) calcd for  $\text{C}_{39}\text{H}_{35}\text{O}_5\text{NNaS}_2$   $[\text{M}+\text{Na}]^+$  684.1848; found: 684.1846.

**(E)-1-(1-((4-chlorophenyl)sulfonyl)-2-phenyl-indol-3-yl)-2-phenylvinyl 4-methylbenzenesulfonate (3j):**

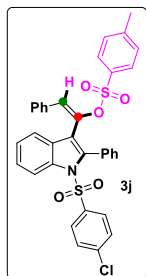

The title compound was prepared according to the general procedure A via column chromatography of silica eluting hexane-ethyl acetate (91:9) to obtain as a white solid (42 mg, yield = 65%); Mp. 135-136 °C;  $^1\text{H}$  NMR (400 MHz,  $\text{CDCl}_3$ )  $\delta$  8.20 (d,  $J = 8.4$  Hz, 1H), 7.42 – 7.32 (m, 3H), 7.32 – 7.24 (m, 8H), 7.17 – 7.07 (m, 4H), 7.00 (d,  $J = 8.0$  Hz, 2H), 6.92 (t,  $J = 7.8$  Hz, 2H), 6.67 (d,  $J = 7.3$  Hz, 2H), 6.65 (s, 1H), 2.34 (s, 3H).  $^{13}\text{C}$  NMR (101 MHz,  $\text{CDCl}_3$ )  $\delta$  144.7, 140.7, 140.5, 138.8, 137.2, 136.0, 133.1, 132.6, 129.8, 129.3, 129.1, 129.0, 128.7, 128.3, 128.2, 128.2, 127.9, 127.8, 127.4, 126.9, 125.6, 124.9, 121.0, 118.6, 116.5, 21.56. HRMS (ESI) calcd for  $\text{C}_{35}\text{H}_{26}\text{O}_5\text{NClNaS}_2$   $[\text{M}+\text{Na}]^+$  662.0833; found: 662.0830.

**(E)-1-(1-((4-bromophenyl)sulfonyl)-2-phenyl-indol-3-yl)-2-phenylvinyl 4-methylbenzenesulfonate (3k):**

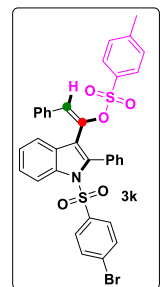

The title compound was prepared according to the general procedure A via column chromatography of silica eluting hexane-ethyl acetate (91:9) to obtain as a white solid (47 mg, yield = 68%); Mp. 144-145 °C;  $^1\text{H}$  NMR (400 MHz,  $\text{CDCl}_3$ )  $\delta$  8.20 (d,  $J = 8.4$  Hz, 1H), 7.43 (d,  $J = 8.8$  Hz, 2H), 7.39 (d,  $J = 7.4$  Hz, 1H), 7.34 (ddd,  $J = 8.5, 7.0, 1.5$  Hz, 2H), 7.30 (s, 1H), 7.28 – 7.20 (m, 5H), 7.17 – 7.07 (m, 4H), 7.00 (d,  $J = 8.0$  Hz, 2H), 6.93 (t,  $J = 7.8$  Hz, 2H), 6.67 (d,  $J = 7.4$  Hz, 2H), 6.65 (s, 1H), 2.34 (s, 3H).  $^{13}\text{C}$  NMR (101 MHz,  $\text{CDCl}_3$ )  $\delta$  144.7, 140.7, 138.8, 137.1, 136.5, 133.1, 132.6, 132.0, 129.8, 129.3, 129.2, 129.1, 128.7, 128.3, 128.3, 128.2, 127.9, 127.8, 127.4, 127.0, 125.6, 124.9, 121.0, 118.6, 116.5, 21.56. HRMS (ESI) calcd for  $\text{C}_{35}\text{H}_{26}\text{O}_5\text{NBrNaS}_2$   $[\text{M}+\text{Na}]^+$  706.0328; found: 706.0326.

**2-phenyl-1-(2-phenyl-1-tosyl-indol-3-yl)ethan-1-one (4a):** The title compound was prepared according to the

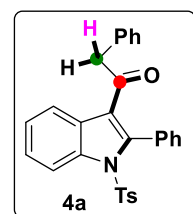

general procedure B via column chromatography of silica eluting hexane-ethyl acetate (93:7) to obtain as a white solid (38 mg, yield = 80%); Mp. 124-125 °C;  $^1\text{H}$  NMR (400 MHz,  $\text{CDCl}_3$ )

$\delta$  8.37 (d,  $J = 8.4$  Hz, 1H), 8.10 (d,  $J = 7.9$  Hz, 1H), 7.59 – 7.54 (m, 1H), 7.44 (ddd,  $J = 11.3, 8.6, 4.7$  Hz, 3H), 7.38 – 7.28 (m, 5H), 7.22 – 7.14 (m, 3H), 7.10 (d,  $J = 8.4$  Hz, 2H), 6.85 (d,  $J = 6.3$  Hz, 2H), 3.30 (s, 2H), 2.34 (s, 3H).  $^{13}\text{C}$  NMR (101 MHz,  $\text{CDCl}_3$ )  $\delta$  196.8, 145.4, 143.0, 136.3, 135.4, 134.2, 131.8, 130.5, 130.2, 129.6, 129.4, 128.2, 127.9, 126.9, 126.6, 125.9, 125.1, 122.9, 121.9, 115.1, 48.4, 21.6. HRMS (ESI) calcd for  $\text{C}_{29}\text{H}_{23}\text{O}_3\text{NNaS}$   $[\text{M}+\text{Na}]^+$  488.1290; found: 488.1290.

**1-(5-methyl-2-phenyl-1-tosyl-indol-3-yl)-2-phenylethan-1-one (4b):** The title compound was prepared

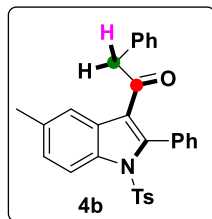

according to the general procedure B via column chromatography of silica eluting hexane-ethyl acetate (93:7) to obtain as a white solid (37 mg, yield = 75%); Mp. 156-157 °C;  $^1\text{H}$  NMR (400 MHz,  $\text{CDCl}_3$ )  $\delta$  8.23 (d,  $J = 8.6$  Hz, 1H), 7.90 (s, 1H), 7.55 (ddd,  $J = 6.7, 4.0, 1.3$  Hz, 1H), 7.46 (t,  $J = 7.5$  Hz, 2H), 7.34 (d,  $J = 7.0$  Hz, 2H), 7.29 (d,  $J = 8.4$  Hz, 2H), 7.26 –

7.22 (m, 1H), 7.21 – 7.11 (m, 3H), 7.08 (d,  $J = 8.5$  Hz, 2H), 6.86 (d,  $J = 6.3$  Hz, 2H), 3.29 (s, 2H), 2.42 (s, 3H), 2.32 (s, 3H).  $^{13}\text{C}$  NMR (101 MHz,  $\text{CDCl}_3$ )  $\delta$  197.0, 145.3, 143.1, 135.4, 134.9, 134.6, 134.2, 131.7, 130.6, 130.1, 129.5, 129.4, 128.2, 128.0, 127.8, 127.2, 126.9, 126.6, 122.8, 121.6, 114.8, 48.3, 21.5, 21.3. HRMS (ESI) calcd for  $\text{C}_{30}\text{H}_{25}\text{O}_3\text{NNaS}$   $[\text{M}+\text{Na}]^+$  502.1447; found: 502.1445.

**1-(5-ethyl-2-phenyl-1-tosyl-indol-3-yl)-2-phenylethan-1-one (4c):** The title compound was prepared

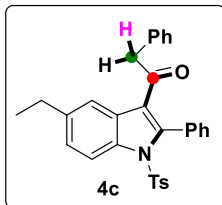

according to the general procedure B via column chromatography of silica eluting hexane-ethyl acetate (93:7) to obtain as a white solid (35 mg, yield = 70%); Mp. 103-104 °C;  $^1\text{H}$  NMR (400 MHz,  $\text{CDCl}_3$ )  $\delta$  8.26 (d,  $J = 8.7$  Hz, 1H), 7.94 (d,  $J = 1.2$  Hz, 1H), 7.58 – 7.53 (m, 1H), 7.49 – 7.44 (m, 2H), 7.35 – 7.26 (m, 5H), 7.22 – 7.12 (m, 3H), 7.10 (d,  $J = 8.0$  Hz, 2H),

6.86 (dd,  $J = 7.9, 1.6$  Hz, 2H), 3.29 (s, 2H), 2.73 (q,  $J = 7.6$  Hz, 2H), 2.34 (s, 3H), 1.26 (t,  $J = 7.6$  Hz, 3H).  $^{13}\text{C}$  NMR (101 MHz,  $\text{CDCl}_3$ )  $\delta$  196.9, 145.3, 143.1, 141.4, 135.5, 134.7, 134.3, 131.8, 130.7, 130.2, 129.7, 129.4, 128.2, 128.0, 127.9, 127.0, 126.6, 126.3, 122.8, 120.6, 114.9, 48.4, 28.8, 21.6, 16.0. HRMS (ESI) calcd for  $\text{C}_{31}\text{H}_{27}\text{O}_3\text{NNaS}$   $[\text{M}+\text{Na}]^+$  516.1603; found: 516.1602.

**1-(5-chloro-2-phenyl-1-tosyl-indol-3-yl)-2-phenylethan-1-one (4d):** The title compound was prepared

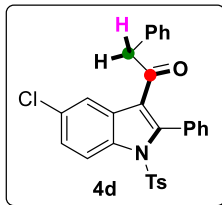

according to the general procedure B via column chromatography of silica eluting hexane-ethyl acetate (92:8) to obtain as a white solid (35 mg, yield = 69%); Mp. 161-162 °C;  $^1\text{H}$  NMR (400 MHz,  $\text{CDCl}_3$ )  $\delta$  8.29 (dd,  $J = 9.0, 0.5$  Hz, 1H), 8.16 (dd,  $J = 2.2, 0.5$  Hz, 1H), 7.60 – 7.56 (m, 1H), 7.50 – 7.45 (m, 2H), 7.39 (dd,  $J = 9.0, 2.2$  Hz, 1H), 7.33 (ddd,  $J = 7.4,$

2.8, 1.6 Hz, 2H), 7.29 – 7.26 (m, 2H), 7.22 – 7.14 (m, 3H), 7.12 (dd,  $J = 8.6, 0.7$  Hz, 2H), 6.84 (dd,  $J = 7.8, 1.7$  Hz, 2H), 3.27 (s, 2H), 2.36 (s, 3H).  $^{13}\text{C}$  NMR (101 MHz,  $\text{CDCl}_3$ )  $\delta$  196.3, 145.7, 144.3, 135.2, 134.6, 133.9, 131.7, 131.0, 130.5, 130.0, 129.7, 129.4, 129.0, 128.3, 128.0, 127.0, 126.8, 126.2, 121.9, 121.8, 116.2, 48.24, 21.63. HRMS (ESI) calcd for  $\text{C}_{29}\text{H}_{22}\text{O}_3\text{NCINaS}$   $[\text{M}+\text{Na}]^+$  522.0901; found: 522.0900.



**1-(5-bromo-2-phenyl-1-tosyl-indol-3-yl)-2-phenylethan-1-one (4e):** The title compound was prepared

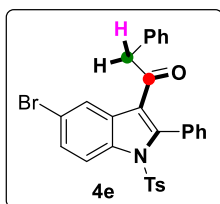

according to the general procedure B via column chromatography of silica eluting hexane-ethyl acetate (92:8) to obtain as a white solid (39 mg, yield = 70%); Mp. 147-148 °C;  $^1\text{H}$  NMR (400 MHz,  $\text{CDCl}_3$ )  $\delta$  8.34 – 8.31 (m, 1H), 8.24 (d,  $J$  = 9.0 Hz, 1H), 7.60 – 7.55 (m, 1H), 7.52 (dd,  $J$  = 9.0, 2.1 Hz, 1H), 7.50 – 7.45 (m, 2H), 7.35 – 7.30 (m, 2H), 7.29 – 7.25 (m, 2H), 7.22 – 7.14 (m, 3H), 7.12 (d,  $J$  = 8.0 Hz, 2H), 6.84 (dd,  $J$  = 7.8, 1.7 Hz, 2H), 3.27 (s, 2H), 2.35 (s, 3H).  $^{13}\text{C}$  NMR (101 MHz,  $\text{CDCl}_3$ )  $\delta$  196.3, 145.7, 144.1, 135.2, 135.0, 133.9, 131.7, 130.5, 130.0, 129.7, 129.4, 129.4, 128.8, 128.3, 128.0, 127.0, 126.7, 124.8, 121.8, 118.8, 116.5, 48.2, 21.6. HRMS (ESI) calcd for  $\text{C}_{29}\text{H}_{22}\text{O}_3\text{NBrNaS}$   $[\text{M}+\text{Na}]^+$  566.0396; found: 566.0394.

**2-phenyl-1-(2-(m-tolyl)-1-tosyl-indol-3-yl)ethan-1-one (4f):** The title compound was prepared according to

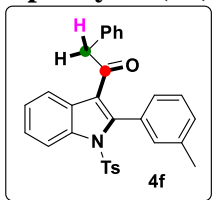

the general procedure B via column chromatography of silica eluting hexane-ethyl acetate (93:7) to obtain as a colorless gummy compound (31 mg, yield = 63%);  $^1\text{H}$  NMR (400 MHz,  $\text{CDCl}_3$ )  $\delta$  8.38 (d,  $J$  = 8.4 Hz, 1H), 8.26 (d,  $J$  = 8.0 Hz, 1H), 7.49 – 7.42 (m, 2H), 7.41 – 7.31 (m, 4H), 7.28 – 7.11 (m, 6H), 6.99 (d,  $J$  = 6.7 Hz, 1H), 6.84 (d,  $J$  = 6.3 Hz, 2H), 3.33 – 3.22 (m, 2H), 2.35 (s, 3H), 2.11 (s, 3H).  $^{13}\text{C}$  NMR (101 MHz,  $\text{CDCl}_3$ )  $\delta$  196.2, 145.5, 142.9, 139.9, 136.2, 135.6, 134.2, 131.2, 130.5, 130.4, 130.2, 129.6, 129.4, 128.2, 127.9, 127.2, 126.6, 125.8, 125.2, 124.9, 122.3, 121.9, 114.8, 47.9, 21.6, 20.3. HRMS (ESI) calcd for  $\text{C}_{30}\text{H}_{25}\text{O}_3\text{NNaS}$   $[\text{M}+\text{Na}]^+$  502.1447; found: 502.1445.

**2-phenyl-1-(2-(p-tolyl)-1-tosyl-indol-3-yl)ethan-1-one (4g):** The title compound was prepared according to

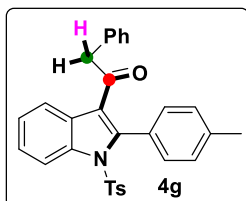

the general procedure B via column chromatography of silica eluting hexane-ethyl acetate (93:7) to obtain as a white solid (35 mg, yield = 71%); Mp. 151-152 °C;  $^1\text{H}$  NMR (400 MHz,  $\text{CDCl}_3$ )  $\delta$  8.35 (d,  $J$  = 8.4 Hz, 1H), 8.08 (d,  $J$  = 7.4 Hz, 1H), 7.42 (ddd,  $J$  = 8.6, 7.3, 1.4 Hz, 1H), 7.36 – 7.30 (m, 3H), 7.28 (d,  $J$  = 8.1 Hz, 2H), 7.26 – 7.22 (m, 2H), 7.22 – 7.13 (m, 3H), 7.10 (d,  $J$  = 8.1 Hz, 2H), 6.87 (d,  $J$  = 6.3 Hz, 2H), 3.32 (s, 2H), 2.48 (s, 3H), 2.38 – 2.38 (m, 1H), 2.34 (s, 3H).  $^{13}\text{C}$  NMR (101 MHz,  $\text{CDCl}_3$ )  $\delta$  197.0, 145.3, 143.4, 140.5, 136.3, 135.4, 134.3, 131.6, 129.5, 129.4, 128.6, 128.2, 128.0, 127.5, 127.0, 126.6, 125.8, 125.0, 122.8, 121.9, 115.2, 48.4, 21.6, 21.6. HRMS (ESI) calcd for  $\text{C}_{30}\text{H}_{25}\text{O}_3\text{NNaS}$   $[\text{M}+\text{Na}]^+$  502.1447; found: 502.1445.

**1-(2-(4-ethylphenyl)-1-tosyl-indol-3-yl)-2-phenylethan-1-one (4h):** The title compound was prepared

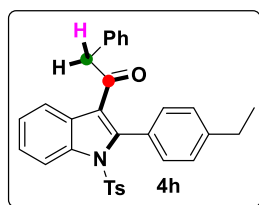

according to the general procedure B via column chromatography of silica eluting hexane-ethyl acetate (93:7) to obtain as a white solid (34 mg, yield = 69%); Mp. 126-127 °C;  $^1\text{H}$  NMR (400 MHz,  $\text{CDCl}_3$ )  $\delta$  8.36 (d,  $J$  = 8.4 Hz, 1H), 8.08 (dd,  $J$  = 7.9, 0.7 Hz, 1H), 7.42 (ddd,  $J$  = 8.5, 7.2, 1.4 Hz, 1H), 7.37 – 7.23 (m, 8H), 7.21 – 7.11 (m, 3H), 7.09 (d,  $J$  = 8.0 Hz, 2H), 6.86 (dd,  $J$  = 7.8, 1.6 Hz, 2H), 3.31 (s, 2H), 2.78 (q,  $J$  = 7.6 Hz, 2H), 2.34 (s, 3H), 1.34 (t,  $J$  = 7.6 Hz, 3H).  $^{13}\text{C}$  NMR (101 MHz,  $\text{CDCl}_3$ )  $\delta$  197.0, 146.7, 145.3, 143.4, 136.4, 135.4, 134.3, 131.7, 129.5, 129.4, 128.2, 127.9, 127.6, 127.3, 127.0, 126.6, 125.8, 125.0, 122.8, 121.8, 115.2, 110.0, 48.3, 28.8, 21.6, 15.3. HRMS (ESI) calcd for  $\text{C}_{31}\text{H}_{27}\text{O}_3\text{NNaS}$   $[\text{M}+\text{Na}]^+$  516.1603; found: 516.1603.

**1-(2-(4-methoxyphenyl)-1-tosyl-indol-3-yl)-2-phenylethan-1-one (4i):** The title compound was prepared

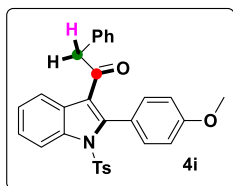

according to the general procedure B via column chromatography of silica eluting hexane-ethyl acetate (91:9) to obtain as a white solid (27 mg, yield = 53%); Mp. 131-132 °C; <sup>1</sup>H NMR (400 MHz, CDCl<sub>3</sub>) δ 8.36 (d, *J* = 8.3 Hz, 1H), 8.07 (ddd, *J* = 7.9, 1.4, 0.7 Hz, 1H), 7.42 (ddd, *J* = 8.5, 7.2, 1.4 Hz, 1H), 7.36 – 7.32 (m, 1H), 7.31 – 7.28 (m, 2H), 7.27 – 7.23 (m, 2H), 7.22 – 7.12 (m, 3H), 7.10 (s, 2H), 6.97 (d, *J* = 8.8 Hz, 2H), 6.88 (dd, *J* = 7.9, 1.6 Hz, 2H), 3.91 (s, 3H), 3.34 (s, 2H), 2.33 (s, 3H). <sup>13</sup>C NMR (101 MHz, CDCl<sub>3</sub>) δ 197.0, 161.1, 145.3, 143.3, 136.4, 135.5, 134.3, 133.2, 129.5, 129.4, 128.2, 127.9, 126.9, 126.6, 125.8, 125.0, 122.3, 121.8, 115.2, 113.3, 55.4, 48.4, 21.6. HRMS (ESI) calcd for C<sub>30</sub>H<sub>25</sub>O<sub>4</sub>NNaS [M+Na]<sup>+</sup> 518.1396; found: 518.1394.

**1-(2-butyl-1-tosyl-indol-3-yl)-2-phenylethan-1-one (4j):** The title compound was prepared according to the

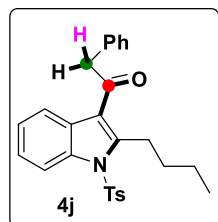

general procedure B via column chromatography of silica eluting hexane-ethyl acetate (94:6) to obtain as a white solid (20 mg, yield = 43%); Mp. 119-120 °C; <sup>1</sup>H NMR (400 MHz, CDCl<sub>3</sub>) δ 8.27 (dd, *J* = 5.6, 3.8 Hz, 1H), 7.85 (d, *J* = 9.2 Hz, 1H), 7.64 (d, *J* = 8.3 Hz, 2H), 7.39 – 7.14 (m, 9H), 4.25 (s, 2H), 3.28 – 3.20 (m, 2H), 2.36 (s, 3H), 1.66 – 1.58 (m, 2H), 1.41 (dt, *J* = 14.9, 7.4 Hz, 2H), 0.90 (t, *J* = 7.3 Hz, 3H). <sup>13</sup>C NMR (101 MHz, CDCl<sub>3</sub>) δ 196.1, 148.2, 145.3, 136.1, 136.0, 134.2, 130.0, 129.6, 128.5, 127.0, 126.9, 126.4, 124.6, 124.3, 120.5, 120.3, 115.1, 50.2, 33.2, 27.2, 22.9, 21.6, 13.7. HRMS (ESI) calcd for C<sub>27</sub>H<sub>27</sub>O<sub>3</sub>NNaS [M+Na]<sup>+</sup> 468.1603; found: 468.1601.

**1-(2-(3-chlorophenyl)-1-tosyl-indol-3-yl)-2-phenylethan-1-one (4k):** The title compound was prepared

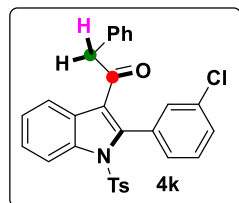

according to the general procedure B via column chromatography of silica eluting hexane-ethyl acetate (93:7) to obtain as a white solid (35 mg, yield = 68%); Mp. 120-121 °C; <sup>1</sup>H NMR (400 MHz, CDCl<sub>3</sub>) δ 8.37 (d, *J* = 8.4 Hz, 1H), 8.12 (d, *J* = 8.0 Hz, 1H), 7.53 (d, *J* = 8.1 Hz, 1H), 7.48 – 7.35 (m, 3H), 7.34 – 7.27 (m, 3H), 7.24 – 7.11 (m, 5H), 7.07 (s, 1H), 6.86 (d, *J* = 6.3 Hz, 2H), 3.38 (s, 2H), 2.36 (s, 3H). <sup>13</sup>C NMR (101 MHz, CDCl<sub>3</sub>) δ 196.3, 145.7, 140.9, 136.5, 135.3, 133.8, 132.1, 131.5, 130.2, 130.1, 129.7, 129.3, 129.1, 128.4, 127.6, 126.9, 126.8, 126.2, 125.2, 123.0, 122.0, 115.2, 48.7, 21.6. HRMS (ESI) calcd for C<sub>29</sub>H<sub>23</sub>O<sub>3</sub>ClNS [M+H]<sup>+</sup> 500.1081; found: 500.1077.

**methyl 4-(3-(2-phenylacetyl)-1-tosyl-indol-2-yl)benzoate (4l):** The title compound was prepared according to

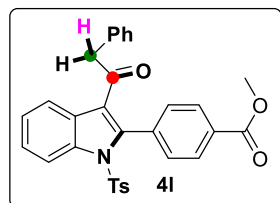

the general procedure B via column chromatography of silica eluting hexane-ethyl acetate (91:9) to obtain as a white solid (37 mg, yield = 70%); Mp. 167-168 °C; <sup>1</sup>H NMR (400 MHz, CDCl<sub>3</sub>) δ 8.36 (d, *J* = 8.5 Hz, 1H), 8.14 (d, *J* = 8.1 Hz, 2H), 8.07 (d, *J* = 8.0 Hz, 1H), 7.48 – 7.41 (m, 3H), 7.39-7.35 (m, 1H), 7.31 (d, *J* = 8.4 Hz, 2H), 7.17 (d, *J* = 6.9 Hz, 3H), 7.12 (d, *J* = 8.5 Hz, 2H), 6.83 (dd, *J* = 7.2, 1.9 Hz, 2H), 4.00 (s, 3H), 3.33 (s, 2H), 2.35 (s, 3H). <sup>13</sup>C NMR (101 MHz, CDCl<sub>3</sub>) δ 196.4, 166.4, 145.7, 141.3, 136.4, 135.2, 135.2, 133.7, 131.8, 131.6, 129.7, 129.3, 128.9, 128.3, 127.8, 126.8, 126.8, 126.2, 125.3, 123.3, 122.0, 115.2, 52.5, 48.8, 21.6. HRMS (ESI) calcd for C<sub>31</sub>H<sub>26</sub>O<sub>5</sub>NS [M+H]<sup>+</sup> 524.1526; found: 524.1520.

**2-(3-nitrophenyl)-1-(2-phenyl-1-tosyl-indol-3-yl)ethan-1-one (4m):** The title compound was prepared

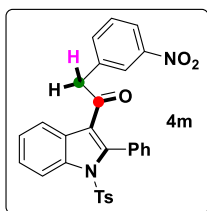

according to the general procedure B via column chromatography of silica eluting hexane-ethyl acetate (90:10) to obtain as a brown solid (37 mg, yield = 70%); Mp. 137-38 °C;  $^1\text{H}$  NMR (400 MHz,  $\text{CDCl}_3$ )  $\delta$  8.39 (d,  $J = 8.5$  Hz, 1H), 8.19 – 8.12 (m, 1H), 8.02 (ddd,  $J = 8.2, 2.2, 1.0$  Hz, 1H), 7.66 (s, 1H), 7.63 – 7.58 (m, 1H), 7.53 – 7.43 (m, 3H), 7.40 – 7.31 (m, 6H), 7.25 (dd,  $J = 4.5, 3.1$  Hz, 1H), 7.12 (d,  $J = 8.0$  Hz, 2H), 3.39 (s, 2H), 2.35 (s, 3H).  $^{13}\text{C}$  NMR (101 MHz,  $\text{CDCl}_3$ )  $\delta$  194.98, 147.9, 145.6, 143.6, 136.3, 136.1, 135.8, 135.4, 131.7, 130.5, 130.4, 129.7, 129.0, 128.1, 127.5, 127.0, 126.1, 125.2, 124.5, 122.2, 121.9, 121.8, 115.1, 47.5, 21.6. HRMS (ESI) calcd for  $\text{C}_{29}\text{H}_{22}\text{O}_5\text{N}_2\text{NaS}$   $[\text{M}+\text{Na}]^+$  533.1141; found: 533.1140.

**methyl 4-(2-oxo-2-(2-phenyl-1-tosyl-indol-3-yl)ethyl)benzoate (4n):** The title compound was prepared

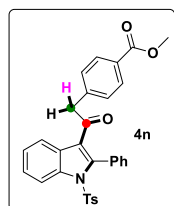

according to the general procedure B via column chromatography of silica eluting hexane-ethyl acetate (91:9) to obtain as a white solid (41 mg, yield = 77%); Mp. 160-161 °C;  $^1\text{H}$  NMR (400 MHz,  $\text{CDCl}_3$ )  $\delta$  8.37 (d,  $J = 8.4$  Hz, 1H), 8.11 (dd,  $J = 7.9, 0.6$  Hz, 1H), 7.85 (d,  $J = 8.4$  Hz, 2H), 7.60 – 7.55 (m, 1H), 7.49 – 7.42 (m, 3H), 7.39 – 7.29 (m, 5H), 7.10 (d,  $J = 8.1$  Hz, 2H), 6.92 (d,  $J = 8.4$  Hz, 2H), 3.86 (s, 3H), 3.35 (s, 2H), 2.34 (s, 3H).  $^{13}\text{C}$  NMR (101 MHz,  $\text{CDCl}_3$ )  $\delta$  195.8, 166.8, 145.5, 143.3, 139.5, 136.3, 135.4, 131.7, 130.4, 130.3, 129.6, 129.5, 129.4, 128.5, 127.9, 127.7, 126.9, 126.0, 125.1, 122.6, 121.9, 115.1, 52.0, 48.2, 21.6. HRMS (ESI) calcd for  $\text{C}_{31}\text{H}_{25}\text{O}_5\text{NNaS}$   $[\text{M}+\text{Na}]^+$  546.1345; found: 546.1344.

**2-phenyl-1-(2-phenyl-1-(phenylsulfonyl)-indol-3-yl)ethan-1-one (4o):** The title compound was prepared

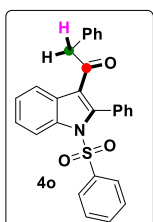

according to the general procedure B via column chromatography of silica eluting hexane-ethyl acetate (93:7) to obtain as a white solid (37 mg, yield = 80%); Mp. 155-156 °C;  $^1\text{H}$  NMR (400 MHz,  $\text{CDCl}_3$ )  $\delta$  8.38 (d,  $J = 8.4$  Hz, 1H), 8.11 (dd,  $J = 7.9, 0.7$  Hz, 1H), 7.59 – 7.49 (m, 2H), 7.48 – 7.29 (m, 10H), 7.22 – 7.12 (m, 3H), 6.85 (dd,  $J = 7.8, 1.7$  Hz, 2H), 3.30 (s, 2H).  $^{13}\text{C}$  NMR (101 MHz,  $\text{CDCl}_3$ )  $\delta$  196.8, 142.9, 138.4, 136.4, 134.1, 131.8, 130.4, 130.3, 129.4, 129.0, 128.3, 127.9, 127.8, 126.9, 126.7, 126.0, 125.1, 123.0, 122.0, 115.1, 48.4. HRMS (ESI) calcd for  $\text{C}_{28}\text{H}_{21}\text{O}_3\text{NNaS}$   $[\text{M}+\text{Na}]^+$  474.1134; found: 474.1133.

**1-(1-((4-(tert-butyl)phenyl)sulfonyl)-2-phenyl-indol-3-yl)-2-phenylethan-1-one (4p):** The title compound

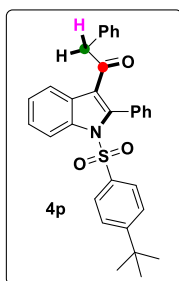

was prepared according to the general procedure B via column chromatography of silica eluting hexane-ethyl acetate (92:8) to obtain as a white solid (32 mg, yield = 63%); Mp. 168-169 °C;  $^1\text{H}$  NMR (400 MHz,  $\text{CDCl}_3$ )  $\delta$  8.38 (d,  $J = 8.4$  Hz, 1H), 8.10 (dd,  $J = 8.0, 0.7$  Hz, 1H), 7.58 – 7.53 (m, 1H), 7.48 – 7.41 (m, 3H), 7.38 – 7.29 (m, 7H), 7.21 – 7.11 (m, 3H), 6.86 (dd,  $J = 7.8, 1.6$  Hz, 2H), 3.30 (s, 2H), 1.26 (s, 9H).  $^{13}\text{C}$  NMR (101 MHz,  $\text{CDCl}_3$ )  $\delta$  196.9, 158.3, 142.9, 136.4, 135.4, 134.2, 131.8, 130.6, 130.2, 129.4, 128.2, 127.9, 127.8, 126.9, 126.7, 126.0, 125.9, 125.0, 122.8, 121.2, 115.1, 48.4, 35.3, 30.9. HRMS (ESI) calcd for  $\text{C}_{32}\text{H}_{29}\text{O}_3\text{NNaS}$   $[\text{M}+\text{Na}]^+$  530.1760; found: 530.1759.

**1-(1-((4-methoxyphenyl)sulfonyl)-2-phenyl-indol-3-yl)-2-phenylethan-1-one (4q):** The title compound was

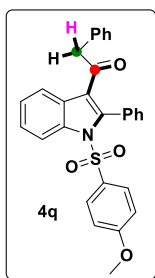

prepared according to the general procedure B via column chromatography of silica eluting hexane-ethyl acetate (92:8) to obtain as a white solid (24 mg, yield = 48%); Mp. 168-169 °C;  $^1\text{H}$  NMR (400 MHz,  $\text{CDCl}_3$ )  $\delta$  8.37 (d,  $J = 8.4$  Hz, 1H), 8.10 (dd,  $J = 7.9, 0.7$  Hz, 1H), 7.59 – 7.53 (m, 1H), 7.50 – 7.41 (m, 3H), 7.39 – 7.32 (m, 5H), 7.22 – 7.11 (m, 3H), 6.85 (dd,  $J = 7.8, 1.6$  Hz, 2H), 6.75 (d,  $J = 9.1$  Hz, 2H), 3.79 (s, 3H), 3.30 (s, 2H).  $^{13}\text{C}$  NMR (101 MHz,  $\text{CDCl}_3$ )  $\delta$  196.80, 164.01, 142.96, 136.35, 134.21, 131.77, 130.62, 130.19, 129.89, 129.37, 129.27, 128.23, 127.86, 126.64, 125.84, 125.00, 122.78, 121.91, 115.14, 114.14, 77.31, 76.99, 76.67, 55.67, 48.41. HRMS (ESI) calcd for  $\text{C}_{32}\text{H}_{29}\text{O}_3\text{NNaS}$   $[\text{M}+\text{Na}]^+$  530.1760; found: 530.1759.

**1-(1-((4-chlorophenyl)sulfonyl)-2-phenyl-indol-3-yl)-2-phenylethan-1-one (4r):** The title compound was

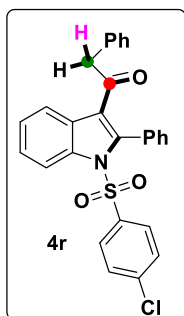

prepared according to the general procedure B via column chromatography of silica eluting hexane-ethyl acetate (92:8) to obtain as a white solid (33 mg, yield = 66%); Mp. 126-127 °C;  $^1\text{H}$  NMR (400 MHz,  $\text{CDCl}_3$ )  $\delta$  8.34 (d,  $J = 8.4$  Hz, 1H), 8.09 (dd,  $J = 7.9, 0.7$  Hz, 1H), 7.60 – 7.55 (m, 1H), 7.50 – 7.42 (m, 3H), 7.41 – 7.26 (m, 7H), 7.22 – 7.10 (m, 3H), 6.85 (dd,  $J = 7.7, 1.7$  Hz, 2H), 3.31 (s, 2H).  $^{13}\text{C}$  NMR (101 MHz,  $\text{CDCl}_3$ )  $\delta$  196.7, 142.6, 141.0, 136.7, 136.3, 134.0, 131.8, 130.4, 130.2, 129.3, 128.3, 128.3, 128.0, 127.9, 126.7, 126.2, 125.3, 122.1, 115.1, 48.5. HRMS (ESI) calcd for  $\text{C}_{28}\text{H}_{20}\text{O}_3\text{NClNaS}$   $[\text{M}+\text{Na}]^+$  508.0744; found: 508.0743.

**1-(1-((4-bromophenyl)sulfonyl)-2-phenyl-indol-3-yl)-2-phenylethan-1-one (4s):** The title compound was

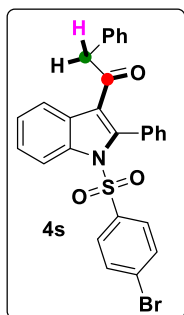

prepared according to the general procedure B via column chromatography of silica eluting hexane-ethyl acetate (92:8) to obtain as a white solid (38 mg, yield = 70%); Mp. 143-144 °C;  $^1\text{H}$  NMR (400 MHz,  $\text{CDCl}_3$ )  $\delta$  8.34 (d,  $J = 8.4$  Hz, 1H), 8.12 – 8.07 (m, 1H), 7.60 – 7.55 (m, 1H), 7.50 – 7.42 (m, 5H), 7.40 – 7.31 (m, 3H), 7.27 – 7.23 (m, 2H), 7.22 – 7.12 (m, 3H), 6.85 (dd,  $J = 7.7, 1.7$  Hz, 2H), 3.31 (s, 2H).  $^{13}\text{C}$  NMR (101 MHz,  $\text{CDCl}_3$ )  $\delta$  196.7, 142.6, 137.2, 136.3, 134.0, 132.3, 131.8, 130.4, 130.2, 129.6, 129.3, 128.3, 128.3, 128.0, 127.9, 126.7, 126.2, 125.4, 123.3, 122.1, 115.1, 48.5. HRMS (ESI) calcd for  $\text{C}_{28}\text{H}_{20}\text{O}_3\text{NBrNaS}$   $[\text{M}+\text{Na}]^+$  552.0239; found: 552.0239.

**1-(1-(naphthalen-2-ylsulfonyl)-2-phenyl-indol-3-yl)-2-phenylethan-1-one (4t):** The title compound was

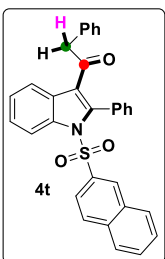

prepared according to the general procedure B via column chromatography of silica eluting hexane-ethyl acetate (89:10) to obtain as a white solid (38 mg, yield = 75%); Mp. 140-141 °C;  $^1\text{H}$  NMR (400 MHz,  $\text{CDCl}_3$ )  $\delta$  8.47 (d,  $J = 8.5$  Hz, 1H), 8.12 (dd,  $J = 8.0, 0.6$  Hz, 1H), 7.86 (d,  $J = 1.9$  Hz, 1H), 7.83 – 7.80 (m, 1H), 7.74 (dd,  $J = 8.5, 2.6$  Hz, 2H), 7.65 – 7.52 (m, 3H), 7.47 (ddd,  $J = 8.6, 7.3, 1.4$  Hz, 1H), 7.42 – 7.34 (m, 4H), 7.26 (dd,  $J = 8.2, 1.3$  Hz, 2H), 7.20 – 7.09 (m, 3H), 6.86 – 6.79 (m, 2H), 3.28 (s, 2H).  $^{13}\text{C}$  NMR (101 MHz,  $\text{CDCl}_3$ )  $\delta$  196.6, 142.9, 136.5, 135.3, 135.1, 134.1, 131.9, 131.4, 130.3, 130.3, 129.6, 129.5, 129.4, 129.3, 129.3, 128.2, 127.9, 127.8, 127.8, 127.7, 126.6, 126.0,

125.1, 122.8, 122.0, 121.1, 115.1, 48.4. HRMS (ESI) calcd for  $C_{32}H_{23}O_3NNaS$   $[M+Na]^+$  524.1290; found: 524.1289.

**1-(1-(methylsulfonyl)-2-phenyl-indol-3-yl)-2-phenylethan-1-one (4u):** The title compound was prepared

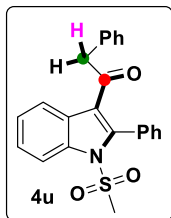

according to the general procedure B via column chromatography of silica eluting hexane-ethyl acetate (93:7) to obtain as a white solid (27 mg, yield = 68%); Mp. 168-169 °C;  $^1H$  NMR (400 MHz,  $CDCl_3$ )  $\delta$  8.23 – 8.19 (m, 1H), 8.13 – 8.10 (m, 1H), 7.62 – 7.49 (m, 5H), 7.46 – 7.38 (m, 2H), 7.24 – 7.13 (m, 3H), 6.90 (dd,  $J$  = 7.9, 1.5 Hz, 2H), 3.39 (s, 2H), 2.95 (s, 3H).  $^{13}C$  NMR (101 MHz,  $CDCl_3$ )  $\delta$  196.5, 142.8, 135.9, 134.1, 131.1, 130.6, 130.4, 129.4, 128.3, 128.3, 127.9, 126.7, 126.1, 125.3, 122.7, 122.4, 114.4, 48.6, 41.8. HRMS (ESI) calcd for  $C_{23}H_{19}O_3NNaS$   $[M+Na]^+$  412.0977; found: 412.0975.

**1-(1-(ethylsulfonyl)-2-phenyl-indol-3-yl)-2-phenylethan-1-one (4v):** The title compound was prepared

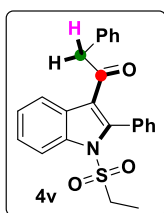

according to the general procedure B via column chromatography of silica eluting hexane-ethyl acetate (93:7) to obtain as a white solid (25 mg, yield = 60%); Mp. 178-179 °C;  $^1H$  NMR (400 MHz,  $CDCl_3$ )  $\delta$  8.24 – 8.17 (m, 1H), 8.14 – 8.08 (m, 1H), 7.65 – 7.47 (m, 5H), 7.44 – 7.36 (m, 2H), 7.24 – 7.13 (m, 3H), 6.94 – 6.86 (m, 2H), 3.38 (s, 2H), 3.13 (q,  $J$  = 7.4 Hz, 2H), 1.12 (t,  $J$  = 7.4 Hz, 3H).  $^{13}C$  NMR (101 MHz,  $CDCl_3$ )  $\delta$  196.6, 143.4, 136.2, 134.1, 131.3, 130.6, 130.3, 129.4, 128.3, 128.2, 127.6, 126.7, 126.0, 125.1, 122.3, 114.3, 114.3, 114.3, 49.5, 48.5, 7.6. HRMS (ESI) calcd for  $C_{24}H_{21}O_3NNaS$   $[M+Na]^+$  426.1134; found: 426.1131.

**1-(1-(cyclopropylsulfonyl)-2-phenyl-indol-3-yl)-2-phenylethan-1-one (4w):** The title compound was

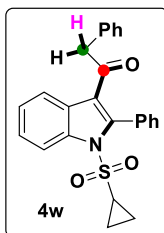

prepared according to the general procedure B via column chromatography of silica eluting hexane-ethyl acetate (93:7) to obtain as a white solid (28 mg, yield = 65%); Mp. 182-183 °C;  $^1H$  NMR (400 MHz,  $CDCl_3$ )  $\delta$  8.22 – 8.17 (m, 1H), 8.17 – 8.12 (m, 1H), 7.61 – 7.47 (m, 5H), 7.43 – 7.36 (m, 2H), 7.24 – 7.13 (m, 3H), 6.90 (dd,  $J$  = 7.9, 1.5 Hz, 2H), 3.38 (s, 2H), 2.45 (tt,  $J$  = 8.0, 4.8 Hz, 1H), 1.21 – 1.08 (m, 2H), 0.97 – 0.83 (m, 2H).  $^{13}C$  NMR (101 MHz,  $CDCl_3$ )  $\delta$  196.7, 143.0, 136.2, 134.2, 131.5, 130.8, 130.3, 129.4, 128.3, 128.1, 127.8, 126.7, 125.9, 125.0, 122.5, 122.1, 114.5, 48.5, 32.1, 6.1. HRMS (ESI) calcd for  $C_{25}H_{21}O_3NNaS$   $[M+Na]^+$  438.1134; found: 438.1131.

**N,N-dimethyl-2-phenyl-3-(2-phenylacetyl)-indole-1-sulfonamide (4x):** The title compound was prepared

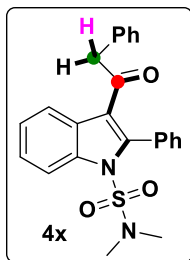

according to the general procedure B via column chromatography of silica eluting hexane-ethyl acetate (92:8) to as a white solid (26 mg, yield = 60%); Mp. 124-125 °C;  $^1H$  NMR (400 MHz,  $CDCl_3$ )  $\delta$  8.22 – 8.15 (m, 2H), 7.56 – 7.52 (m, 4H), 7.44 – 7.31 (m, 3H), 7.23 – 7.14 (m, 4H), 6.94 – 6.88 (m, 2H), 3.34 (s, 2H), 2.50 (d,  $J$  = 1.5 Hz, 6H).  $^{13}C$  NMR (101 MHz,  $CDCl_3$ )  $\delta$  196.7, 131.4, 131.4, 130.1, 129.4, 129.0, 129.0, 128.2, 128.1, 128.0, 127.8, 126.6, 125.5, 124.5, 121.9, 114.9, 48.5, 37.4. HRMS (ESI) calcd for  $C_{24}H_{22}O_3NNaS$   $[M+Na]^+$  441.1243;

found: 441.1241.

**2-phenyl-1-(2-phenyl-1-tosyl-indol-3-yl)ethan-1-ol (5):** The title compound was prepared according to the

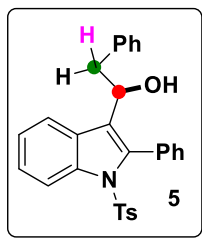

procedure C via column chromatography of silica eluting hexane-ethyl acetate (86:14) to obtain as a white solid (66 mg, yield = 93%); Mp. 160-161 °C;  $^1\text{H}$  NMR (400 MHz,  $\text{CDCl}_3$ )  $\delta$  8.36 (d,  $J$  = 8.4 Hz, 1H), 7.95 (d,  $J$  = 7.8 Hz, 1H), 7.44 – 7.30 (m, 4H), 7.30 – 7.11 (m, 6H), 7.08 (t,  $J$  = 7.5 Hz, 4H), 6.80 (d,  $J$  = 7.0 Hz, 2H), 6.27 (s, 1H), 4.63 (t,  $J$  = 6.7 Hz, 1H), 3.20 – 3.08 (m, 2H), 2.34 (s, 3H).  $^{13}\text{C}$  NMR (101 MHz,  $\text{CDCl}_3$ )  $\delta$  144.5, 137.6, 137.2, 137.0, 135.5,

131.2, 130.2, 129.4, 129.4, 128.7, 128.3, 128.0, 127.2, 126.8, 126.3, 124.9, 123.8, 123.4, 121.3, 115.8, 69.7, 43.3, 21.5. HRMS (ESI) calcd for  $\text{C}_{29}\text{H}_{25}\text{O}_3\text{NNaS}$   $[\text{M}+\text{Na}]^+$  490.1447; found: 490.1445.

**4-methyl-N'-(2-phenyl-1-(2-phenyl-1-tosyl-indol-3-yl)ethylidene)benzenesulfonylhydrazide (6):** The title

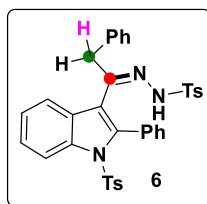

compound was prepared according to the procedure D via column chromatography of silica eluting hexane-ethyl acetate (85:15) to obtain as a white solid (39 mg, yield = 41%); Mp. 131-132 °C;  $^1\text{H}$  NMR (400 MHz,  $\text{CDCl}_3$ )  $\delta$  8.32 (d,  $J$  = 8.5 Hz, 1H), 7.74 (s, 1H), 7.45 (ddd,  $J$  = 8.8, 4.8, 3.0 Hz, 3H), 7.37 – 7.27 (m, 7H), 7.26 – 7.17 (m, 3H), 7.16 – 7.11 (m, 2H), 7.06

(d,  $J$  = 8.1 Hz, 2H), 7.04 – 6.98 (m, 1H), 6.85 (d,  $J$  = 7.6 Hz, 1H), 6.70 (d,  $J$  = 7.1 Hz, 2H), 3.12 (s, 2H), 2.51 (s, 3H), 2.33 (s, 3H).  $^{13}\text{C}$  NMR (101 MHz,  $\text{CDCl}_3$ )  $\delta$  150.7, 145.2, 144.2, 139.5, 136.6, 135.2, 135.2, 133.8, 131.9, 130.5, 129.7, 129.5, 129.4, 128.3, 127.7, 127.6, 127.4, 126.9, 125.4, 124.1, 121.8, 121.0, 115.5, 35.7, 21.7, 21.6. HRMS (ESI) calcd for  $\text{C}_{36}\text{H}_{31}\text{O}_4\text{N}_3\text{NaS}_2$   $[\text{M}+\text{Na}]^+$  656.1648; found: 656.1644.

**2-phenyl-1-(2-phenyl-1-tosyl-indol-3-yl)ethan-1-one oxime (7):** The title compound was prepared according

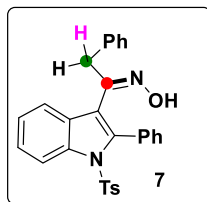

to the procedure E via column chromatography of silica eluting hexane-ethyl acetate (80:20) to obtain as a white solid (62 mg, yield = 85%); Mp. 159-160 °C;  $^1\text{H}$  NMR (400 MHz,  $\text{CDCl}_3$ )  $\delta$  8.47 (brs, 1H), 8.30 (d,  $J$  = 8.4 Hz, 1H), 7.54 (dd,  $J$  = 7.9, 0.5 Hz, 1H), 7.45 – 7.40 (m, 1H), 7.38 – 7.30 (m, 3H), 7.28 – 7.22 (m, 3H), 7.17 (dt,  $J$  = 8.4, 1.6 Hz, 2H), 7.09 – 6.99

(m, 5H), 6.79 (dd,  $J$  = 7.4, 2.1 Hz, 2H), 3.51 (s, 2H), 2.28 (s, 3H).  $^{13}\text{C}$  NMR (101 MHz,  $\text{CDCl}_3$ )  $\delta$  153.6, 144.8, 139.0, 136.8, 135.8, 135.1, 131.6, 130.5, 129.4, 129.1, 128.7, 128.2, 127.3, 126.8, 126.2, 125.3, 124.4, 120.3, 119.4, 115.8, 33.3, 21.5. HRMS (ESI) calcd for  $\text{C}_{29}\text{H}_{24}\text{O}_3\text{N}_2\text{NaS}$   $[\text{M}+\text{Na}]^+$  503.1399; found: 503.1398.

**1-phenyl-2-(2-phenyl-1H-indol-3-yl)ethane-1,2-dione (8a)<sup>2</sup>:** The title compound was prepared according to

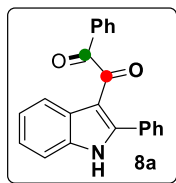

the procedure F via column chromatography of silica eluting hexane-ethyl acetate (86:14) to obtain as a pale-yellow solid (10 mg, yield = 20%); Mp. 198-199 °C;  $^1\text{H}$  NMR (400 MHz,  $\text{DMSO-d}_6$ )  $\delta$  12.63 (brs, 1H), 8.17 (d,  $J$  = 7.8 Hz, 1H), 7.70 – 7.64 (m, 3H), 7.53 (d,  $J$  = 7.7 Hz, 1H), 7.50-7.46 (m, 2H), 7.40 – 7.28 (m, 5H), 7.23-7.19 (m, 2H).  $^{13}\text{C}$  NMR (101 MHz,  $\text{DMSO-d}_6$ )  $\delta$  193.6, 190.3, 148.7, 136.0, 134.2, 133.1, 130.5, 130.1, 129.7, 129.2, 128.8, 127.9, 126.8, 123.8, 122.9,

121.0, 112.3, 110.2. HRMS (ESI) calcd for  $\text{C}_{22}\text{H}_{15}\text{O}_2\text{NNa}$   $[\text{M}+\text{Na}]^+$  348.0995; found: 348.0993.

## 7. References

1. M. R. Mutra, J.-J. Wang, *Nat. Commun.*, 2022, **13**, 2345.
2. R.-Y. Tang, X.-K. Guo, J.-N. Xiang, and J.-H. Li, *J. Org. Chem.*, 2013, **78**, 11163–11171.

Solvent  $\text{CDCl}_3$   
Spectrometer Frequency 400.39  
Nucleus  $^1\text{H}$

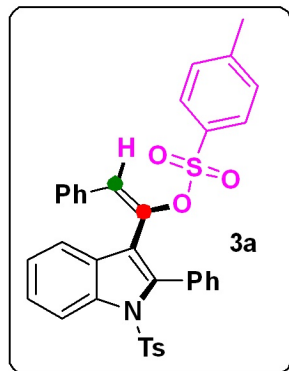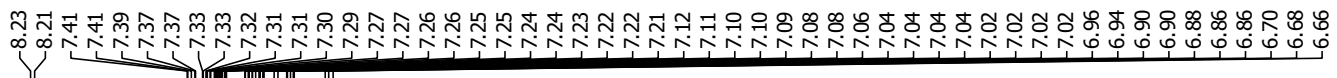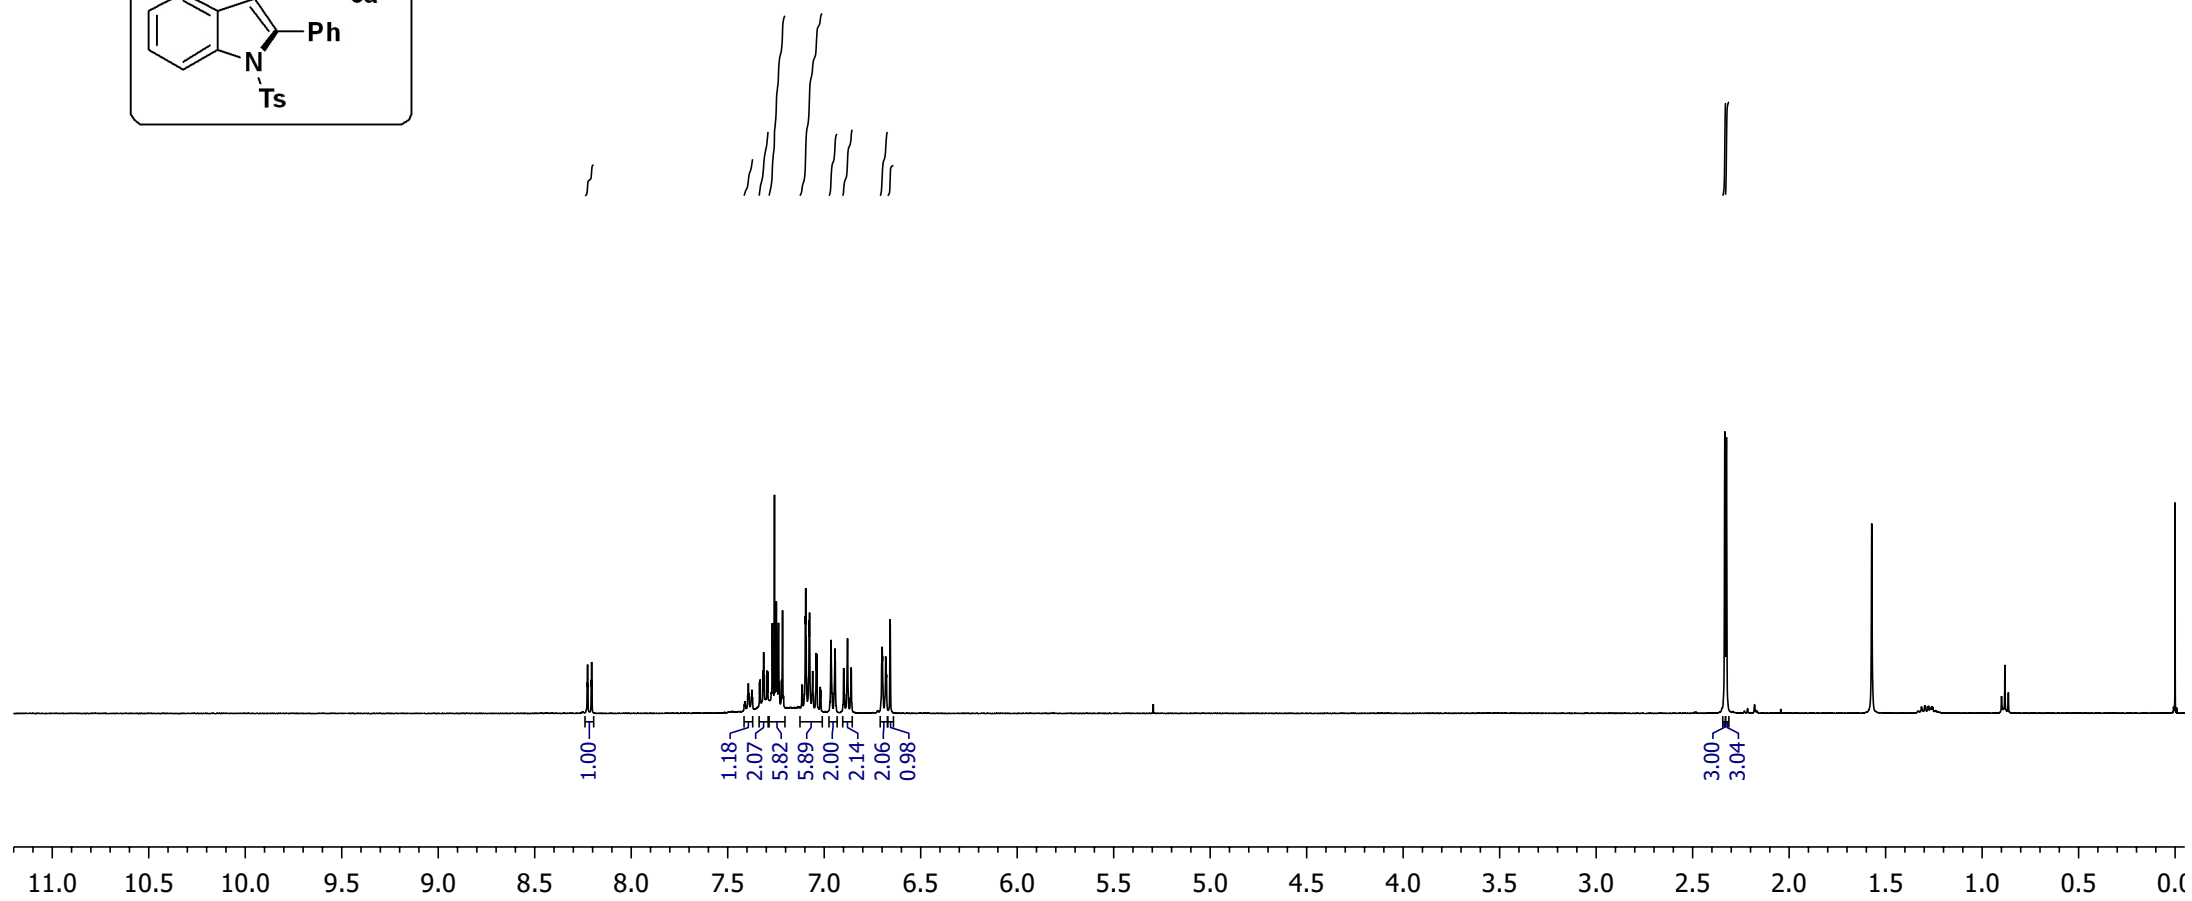



144.85  
144.63  
140.95  
139.12  
137.24  
134.94  
133.14  
132.73  
130.01  
129.31  
129.16  
128.98  
128.40  
128.32  
128.14  
127.79  
127.71  
127.29  
126.88  
126.70  
125.26  
124.50  
120.76  
118.01  
116.45

77.31  
76.99  
76.67

21.58  
21.54

Solvent  $\text{CDCl}_3$   
Spectrometer Frequency 100.69  
Nucleus  $^{13}\text{C}$

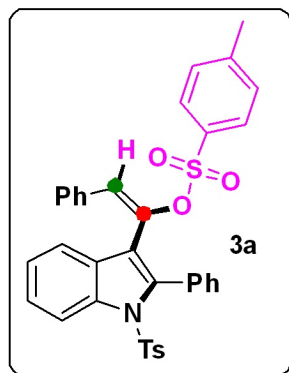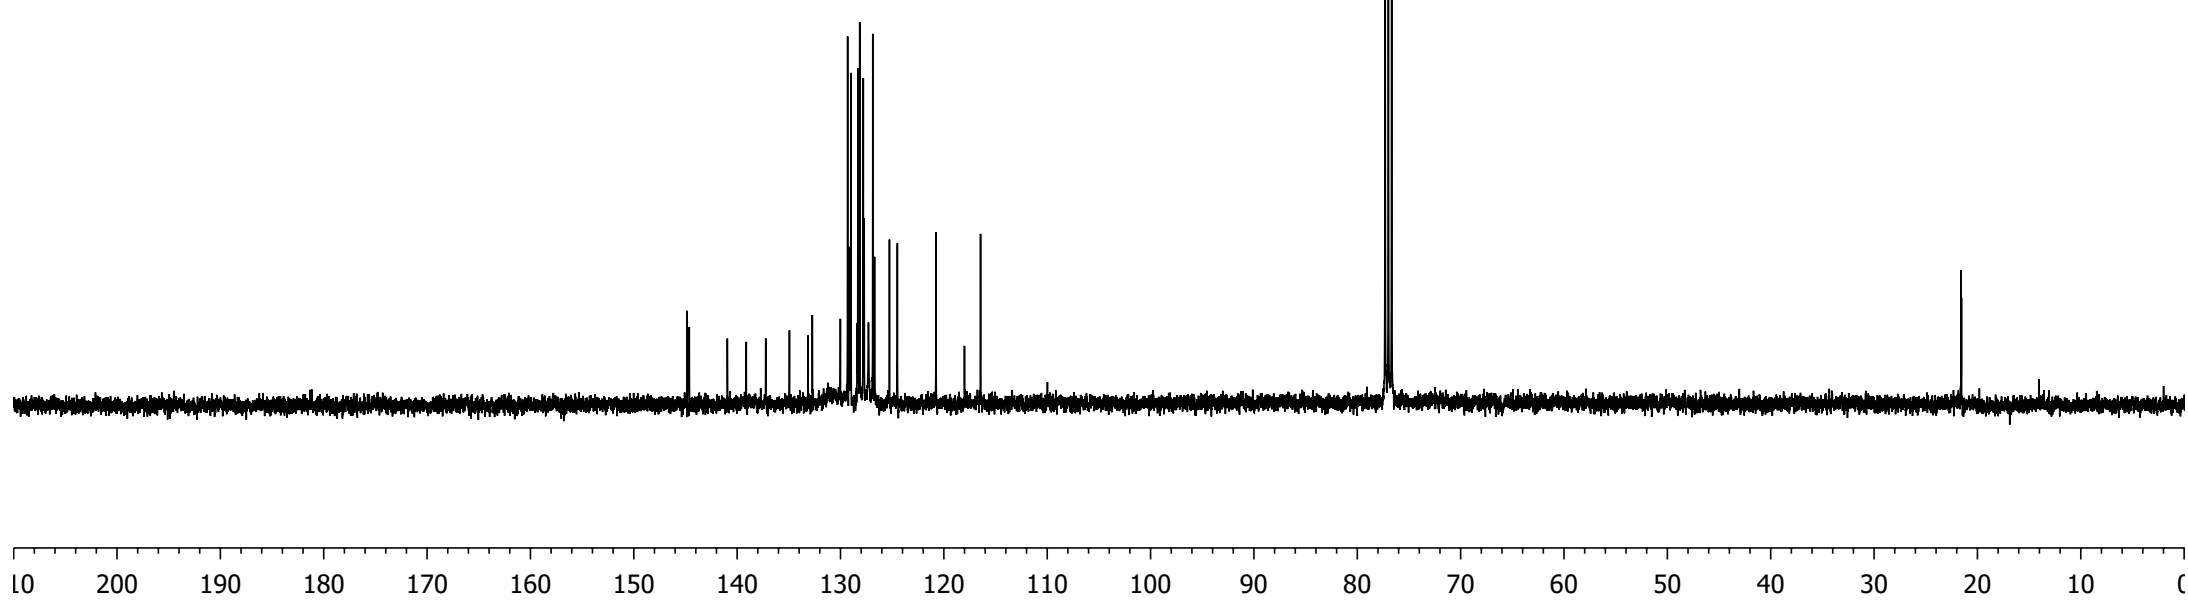

Solvent  $\text{CDCl}_3$   
Spectrometer Frequency 400.39  
Nucleus  $^1\text{H}$

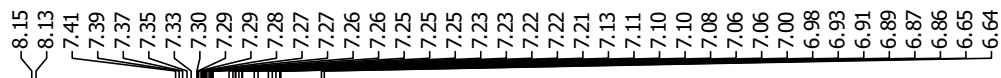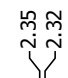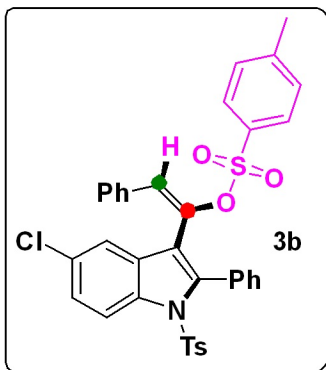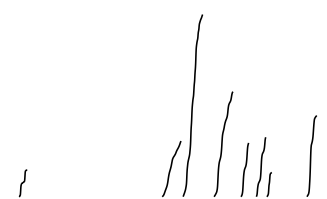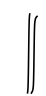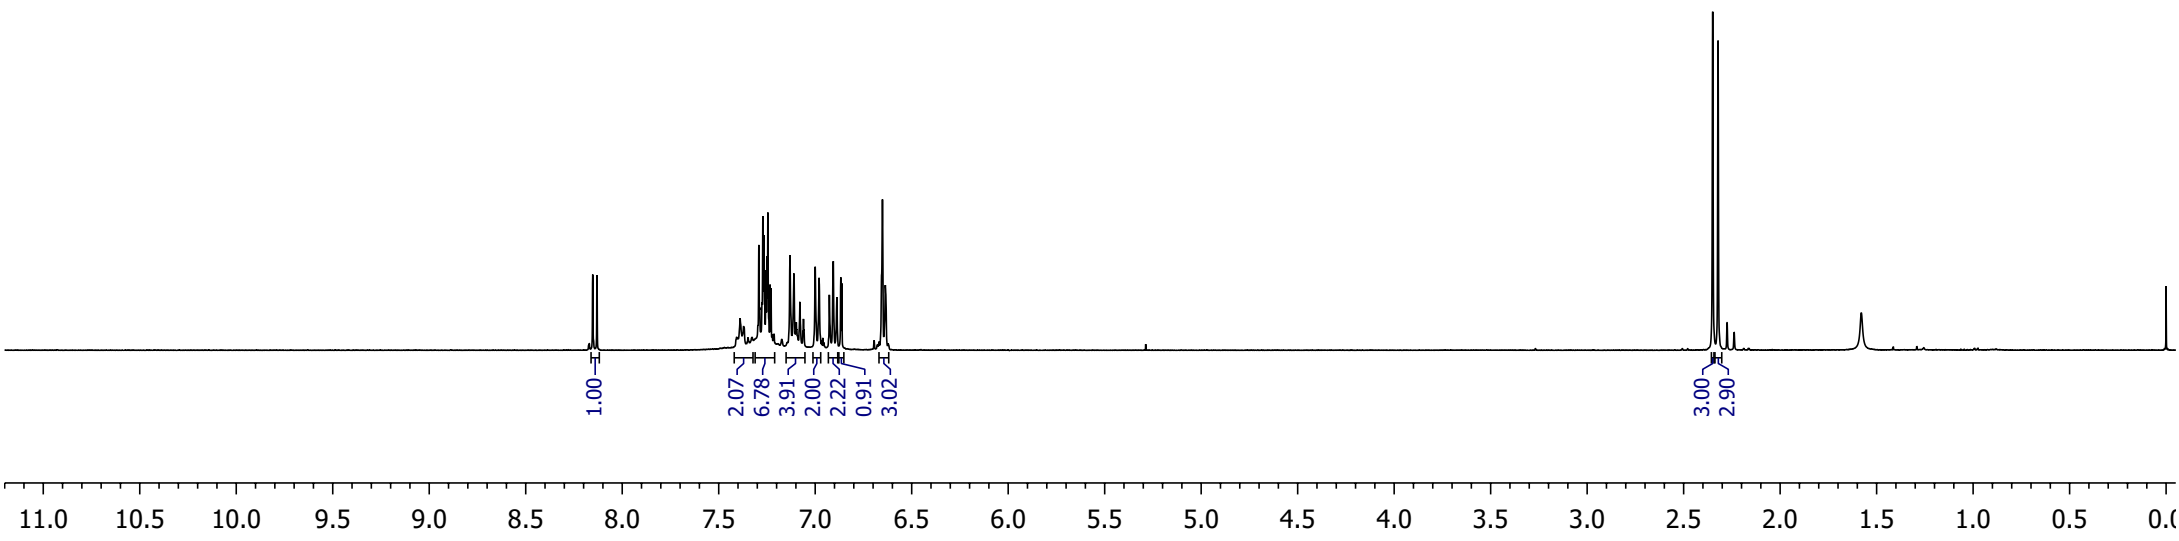

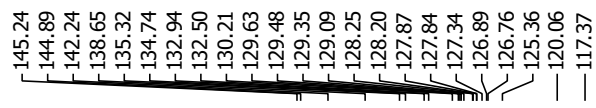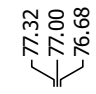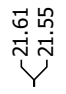

Solvent  $\text{CDCl}_3$   
Spectrometer Frequency 100.66  
Nucleus  $^{13}\text{C}$

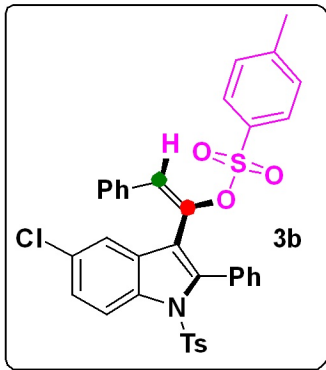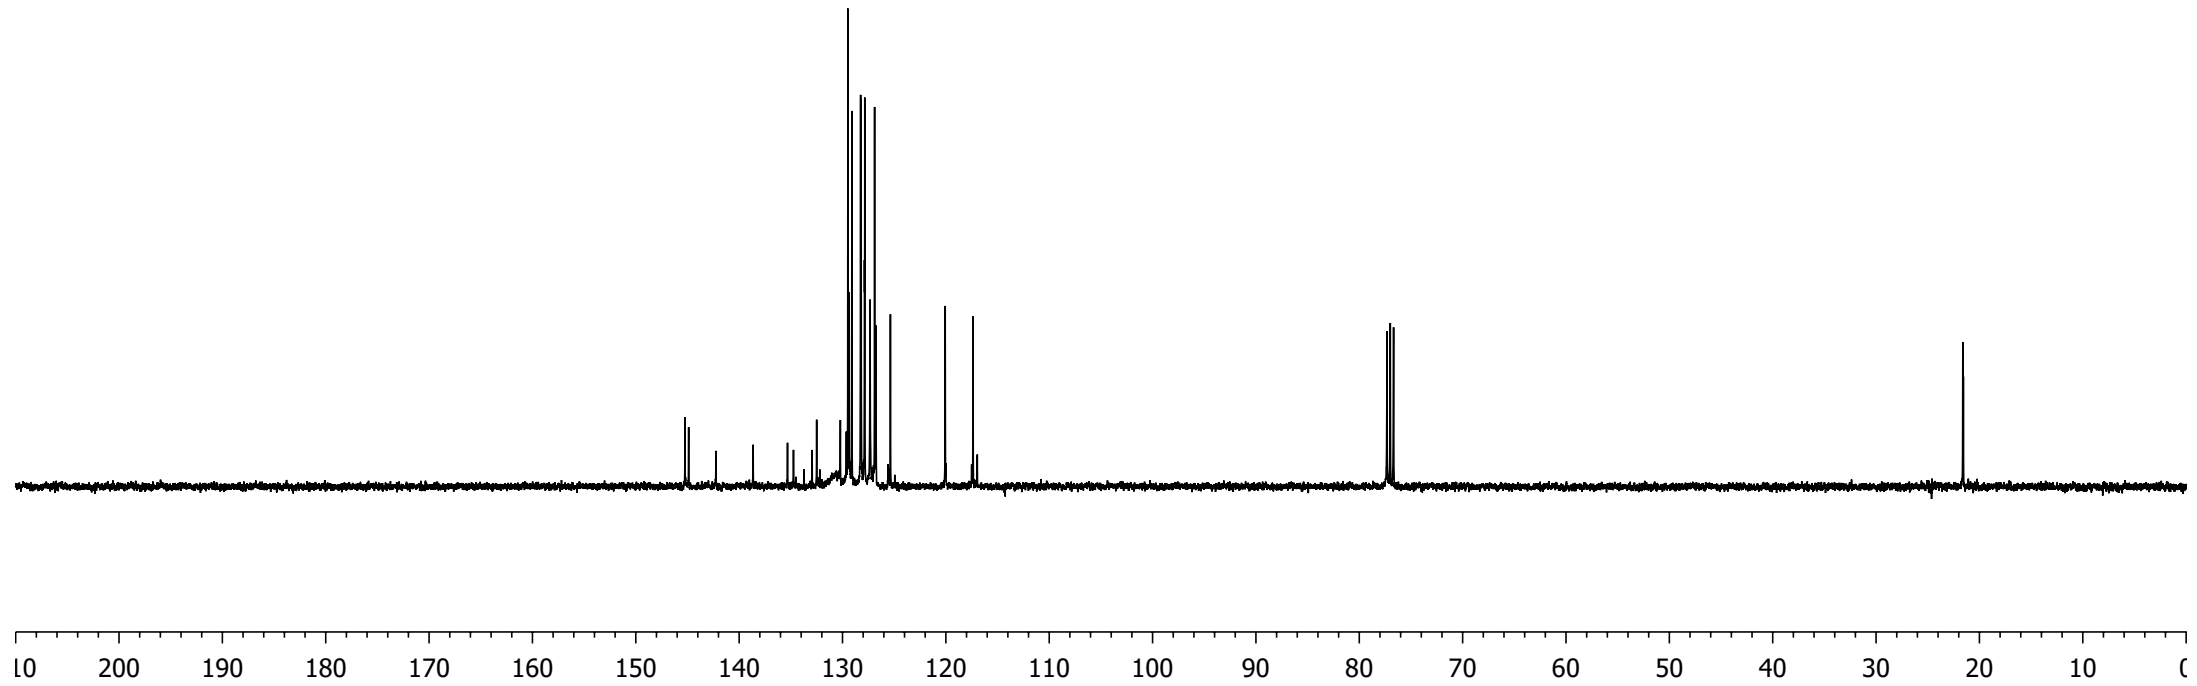

Solvent  $\text{CDCl}_3$   
Spectrometer Frequency 400.39  
Nucleus  $^1\text{H}$

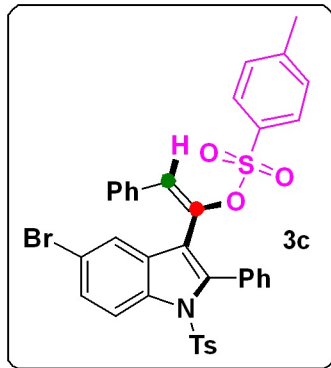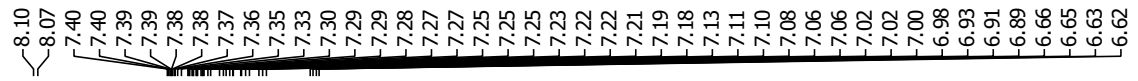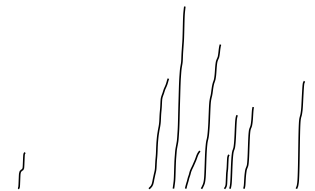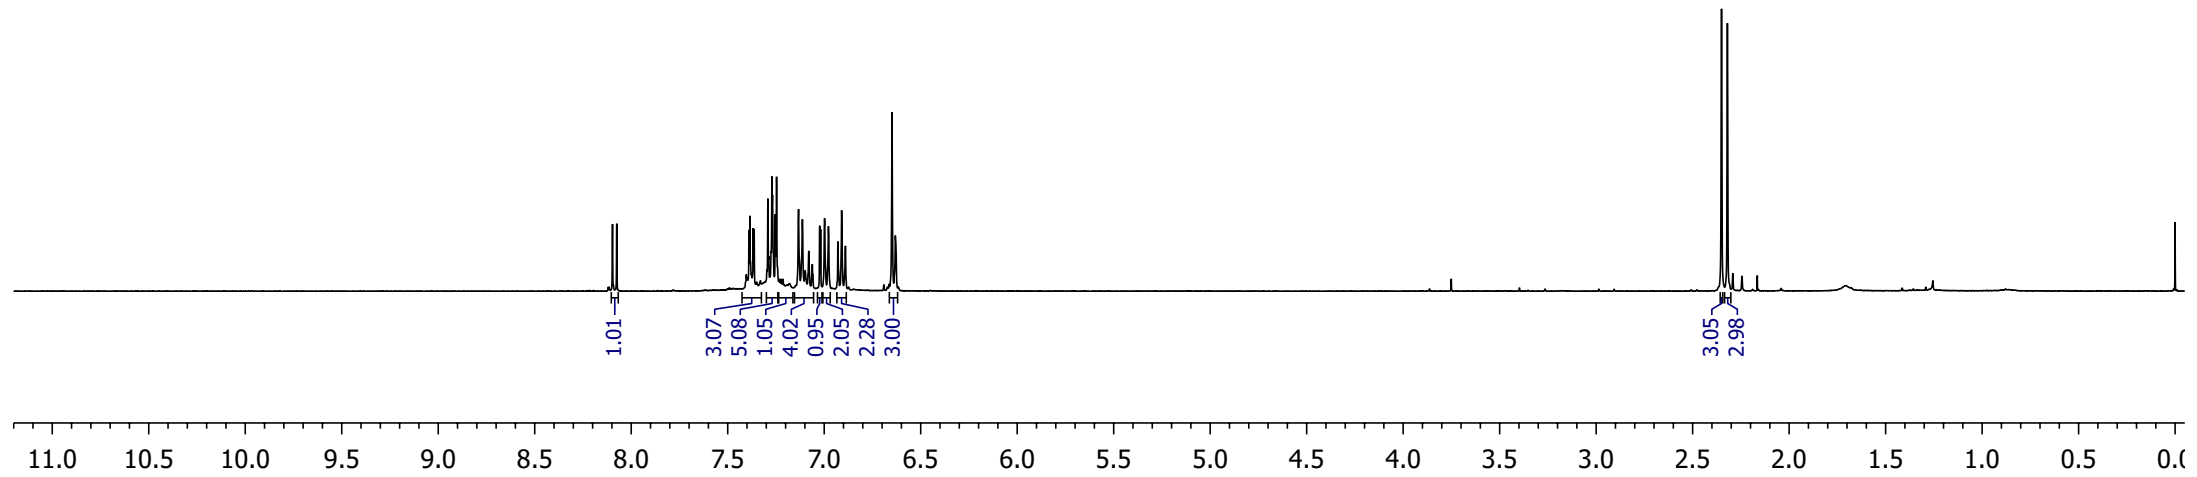

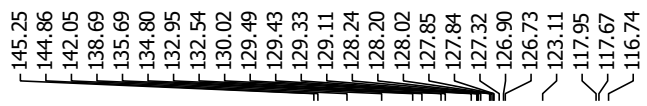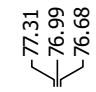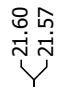

Solvent  $\text{CDCl}_3$   
Spectrometer Frequency 100.69  
Nucleus  $^{13}\text{C}$

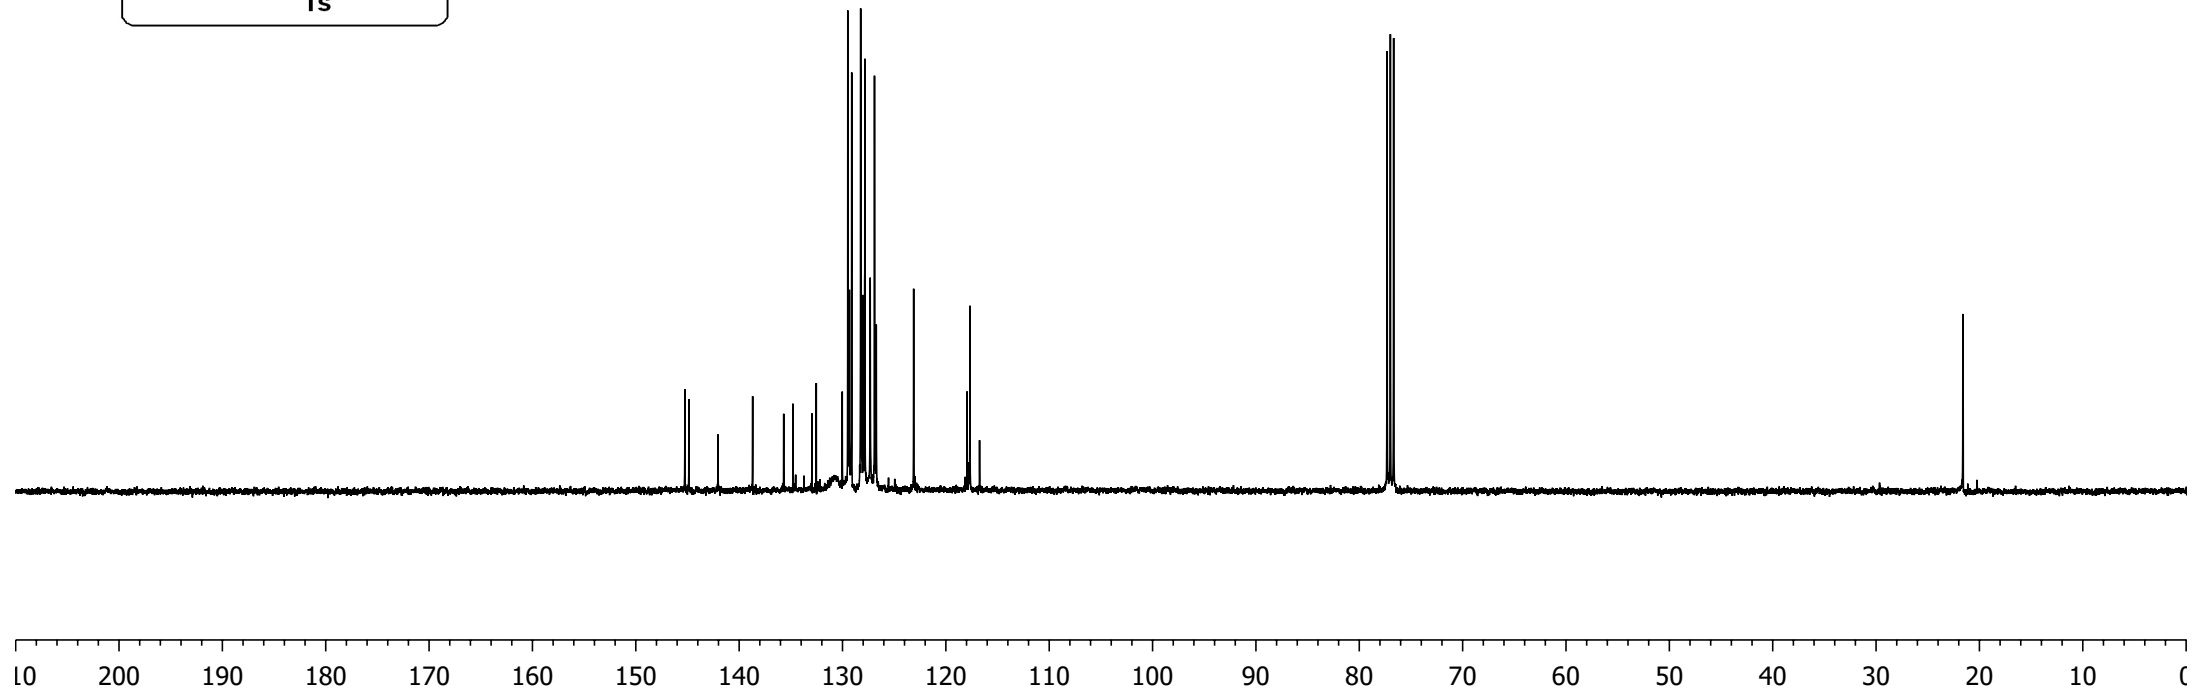

8.23  
8.21  
7.43  
7.41  
7.38  
7.36  
7.26  
7.26  
7.19  
7.17  
7.15  
6.74  
6.72

—5.82

2.79  
2.77  
2.75  
2.73  
2.33  
2.23

1.35  
1.33  
1.31

Solvent  $\text{CDCl}_3$   
Spectrometer Frequency 400.39  
Nucleus  $^1\text{H}$

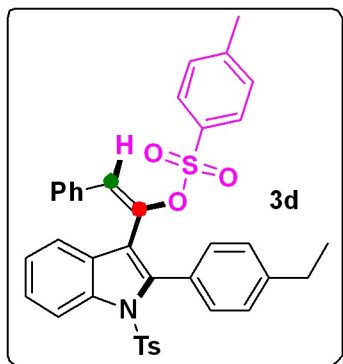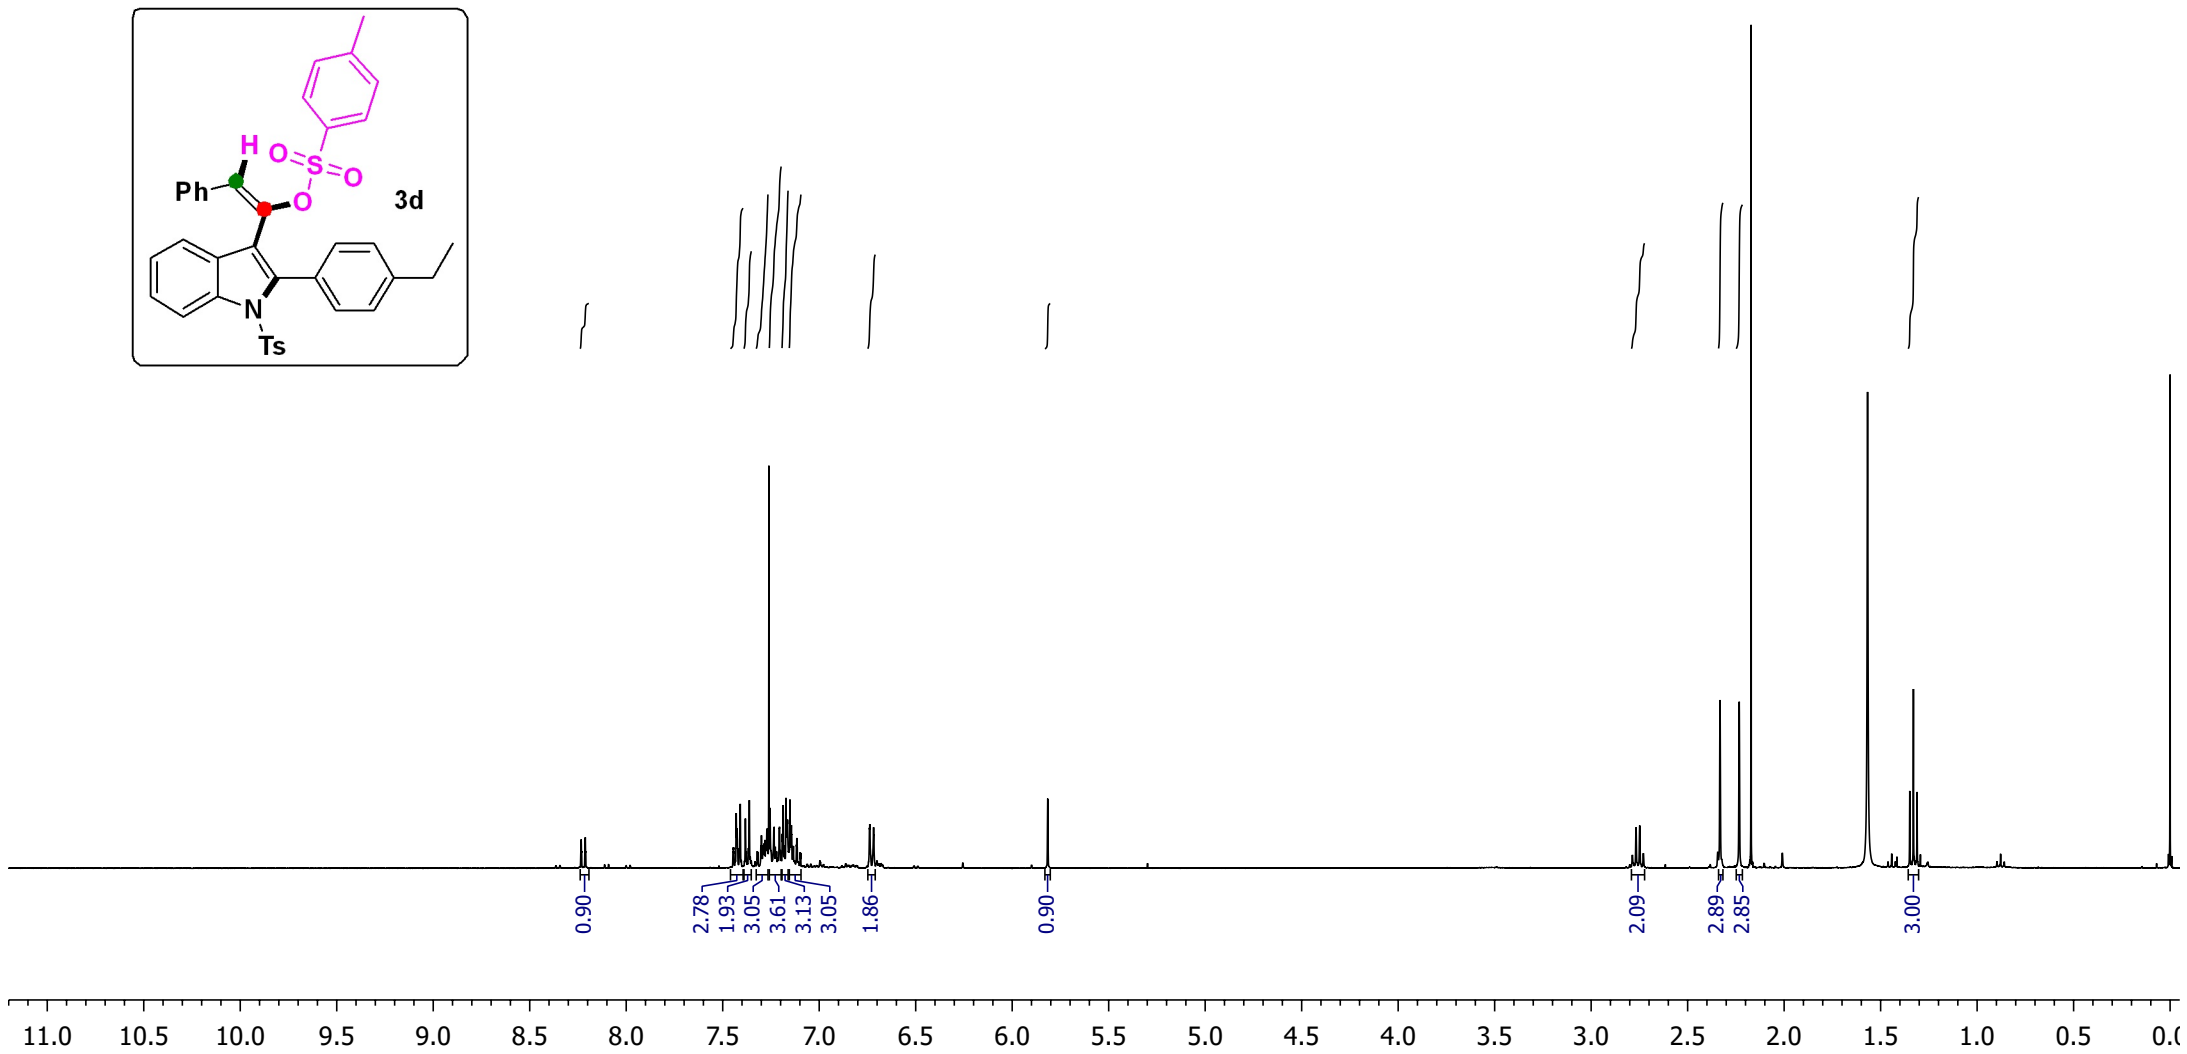

145.27  
144.85  
144.54  
131.48  
129.44  
129.08  
128.74  
128.20  
127.90  
127.07  
124.82  
124.60  
119.43

77.31  
76.99  
76.68

28.80

21.58  
21.42

15.41

Solvent  $\text{CDCl}_3$   
Spectrometer Frequency 100.69  
Nucleus  $^{13}\text{C}$

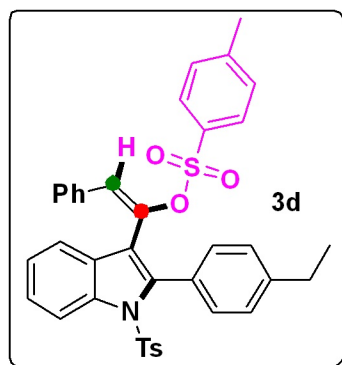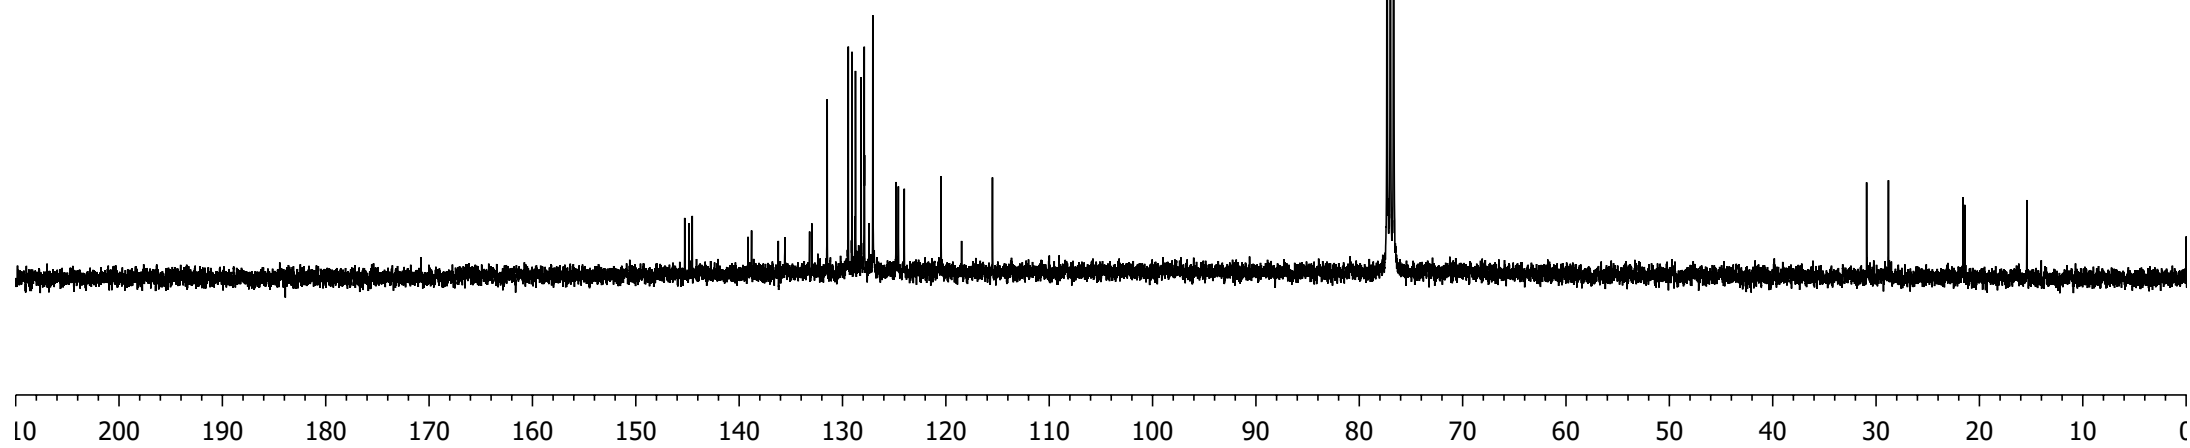

8.25  
8.23  
7.38  
7.36  
7.34  
7.30  
7.28  
7.26  
7.19  
7.17  
7.15  
7.12  
7.10  
7.07  
7.05  
6.92  
6.90  
6.88  
6.63  
6.61  
6.55

2.37  
2.34

Solvent  $\text{CDCl}_3$   
Spectrometer Frequency 400.39  
Nucleus  $^1\text{H}$

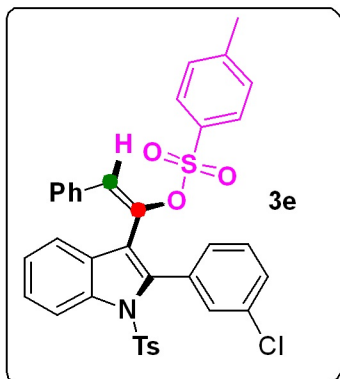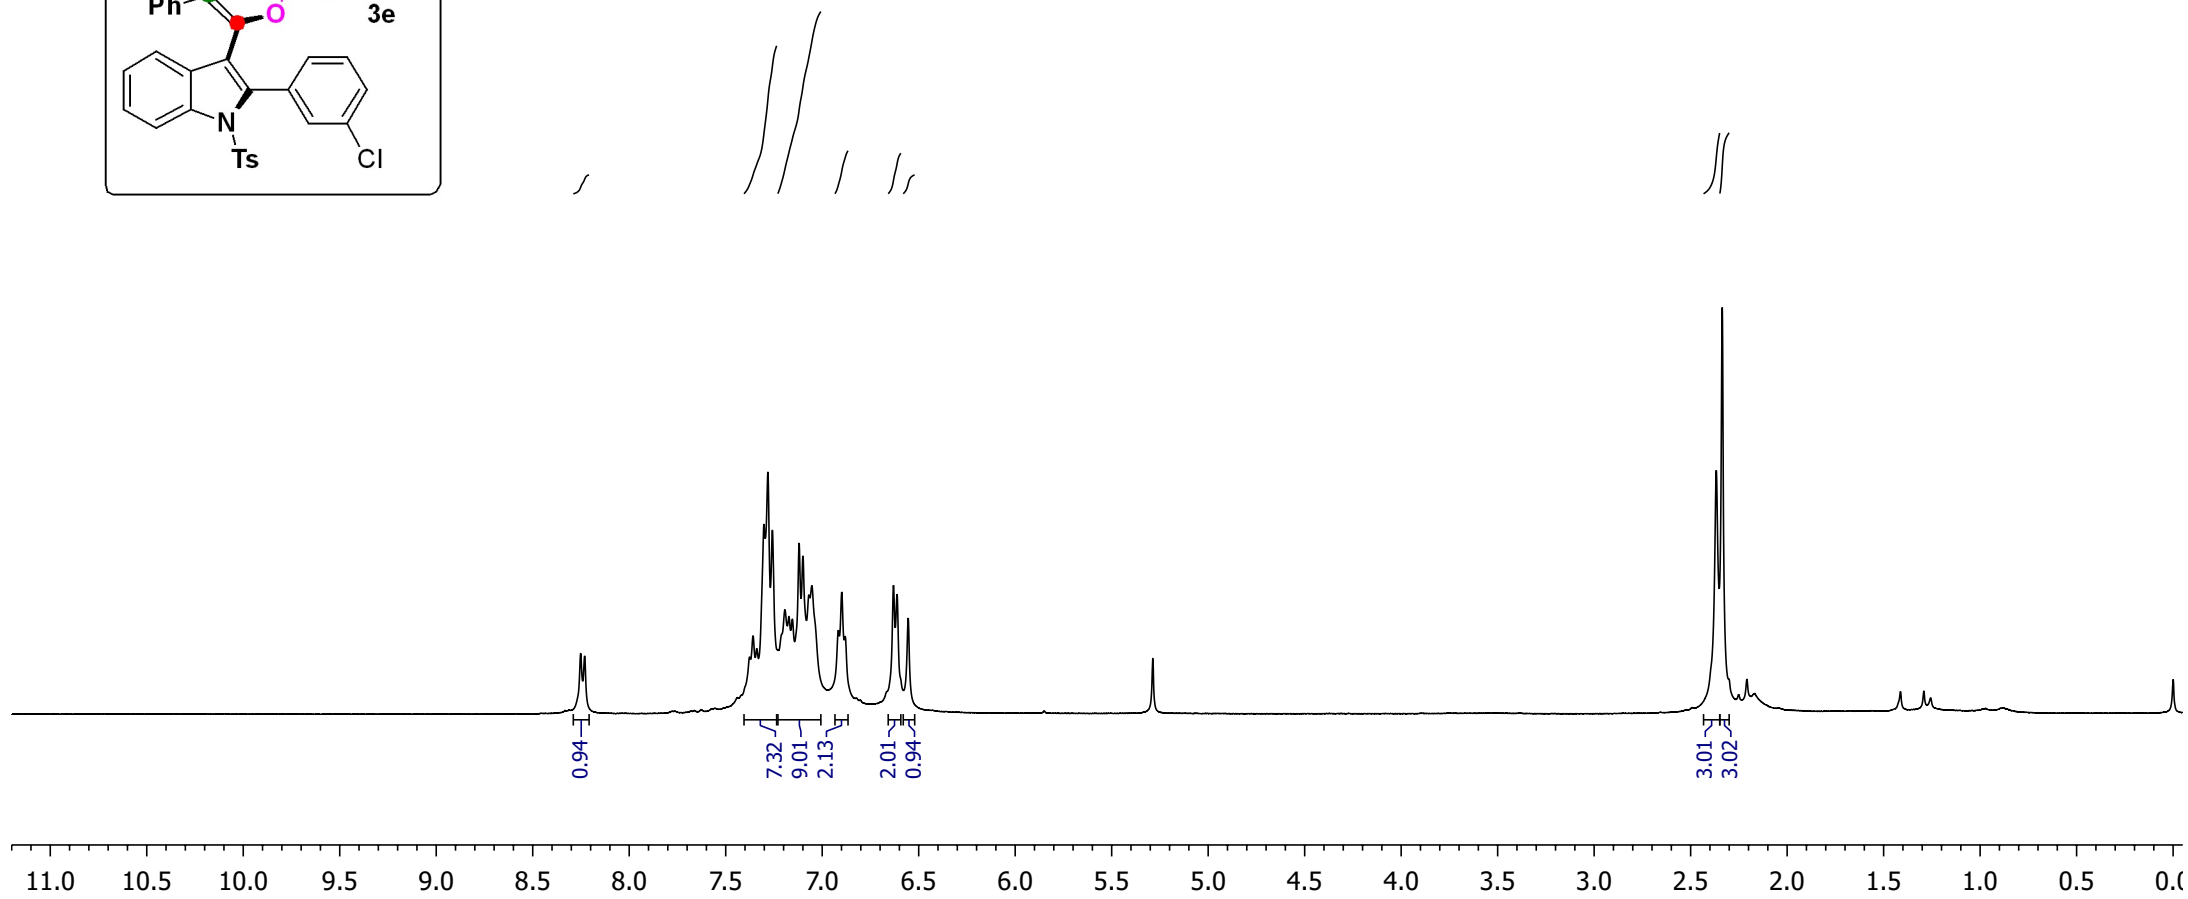



145.10  
144.86  
139.06  
138.79  
137.25  
134.87  
133.17  
132.94  
132.61  
131.65  
129.45  
129.23  
128.94  
128.41  
128.20  
127.78  
126.81  
126.61  
125.64  
124.66  
120.93  
116.32

77.31  
76.99  
76.67

21.58

Solvent  $\text{CDCl}_3$   
Spectrometer Frequency 100.69  
Nucleus  $^{13}\text{C}$

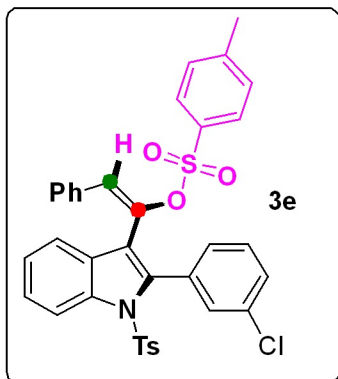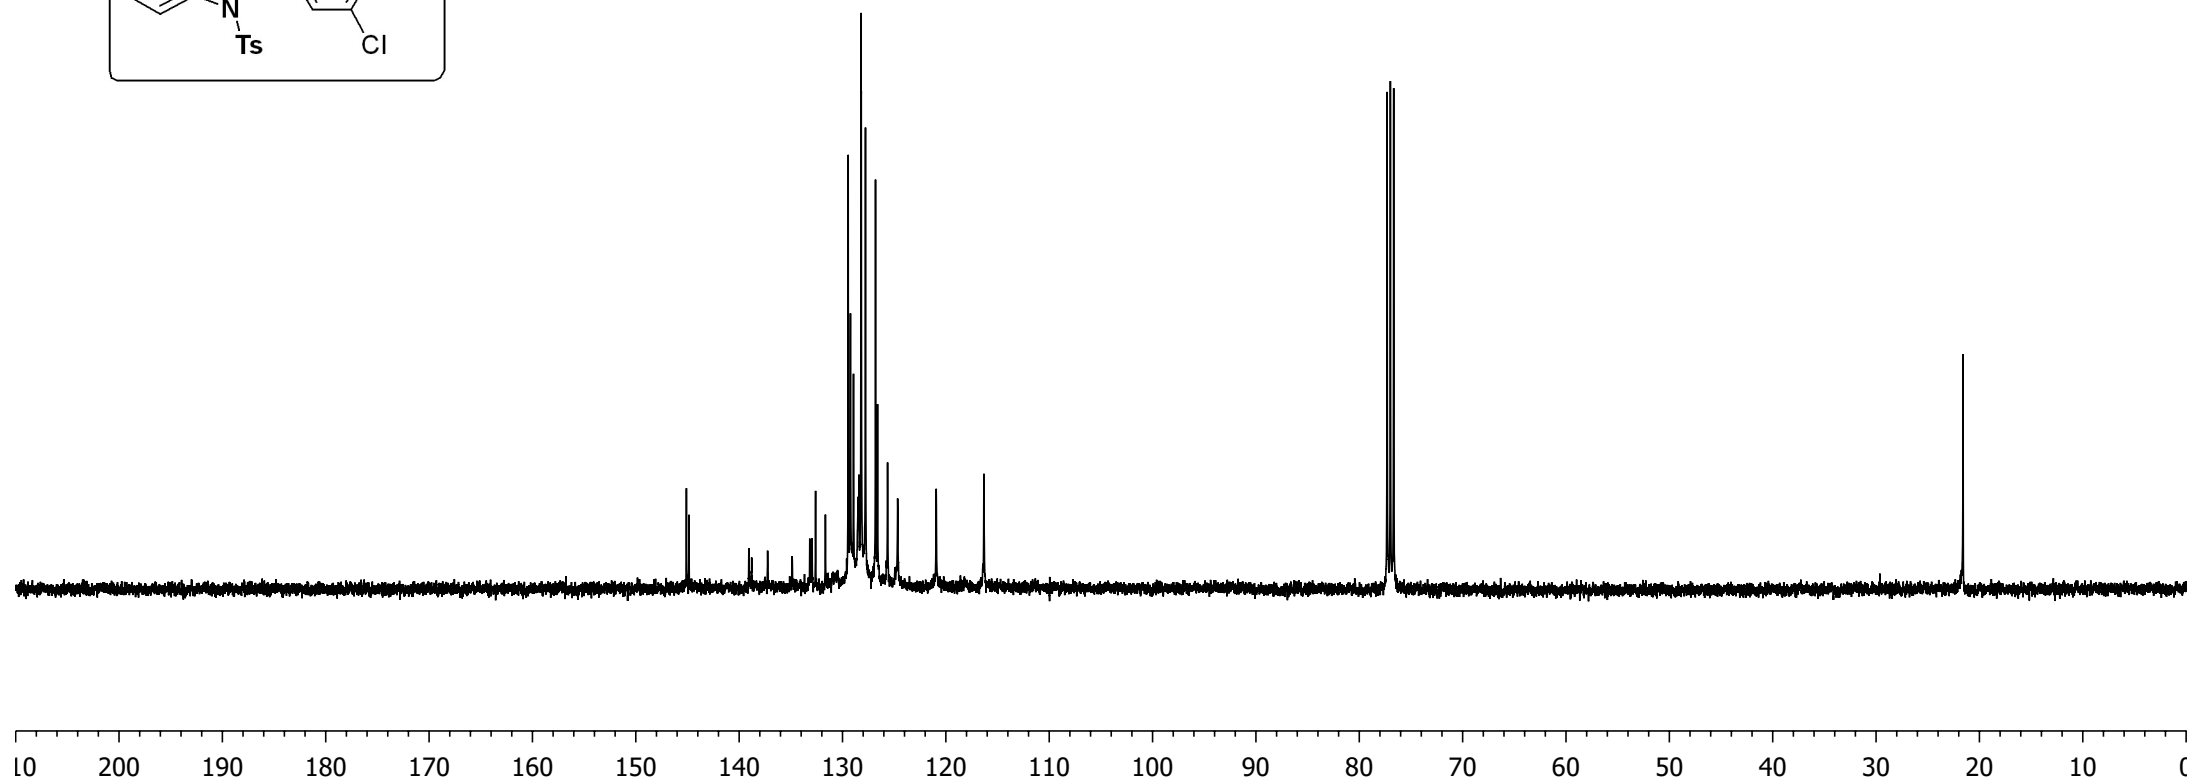

8.26  
8.24  
7.91  
7.88  
7.88  
7.36  
7.34  
7.29  
7.27  
7.14  
7.04  
6.99

2.36  
2.31

Solvent  $\text{CDCl}_3$   
Spectrometer Frequency 400.39  
Nucleus  $^1\text{H}$

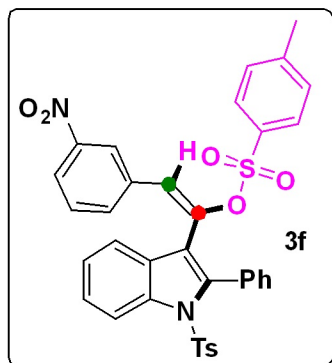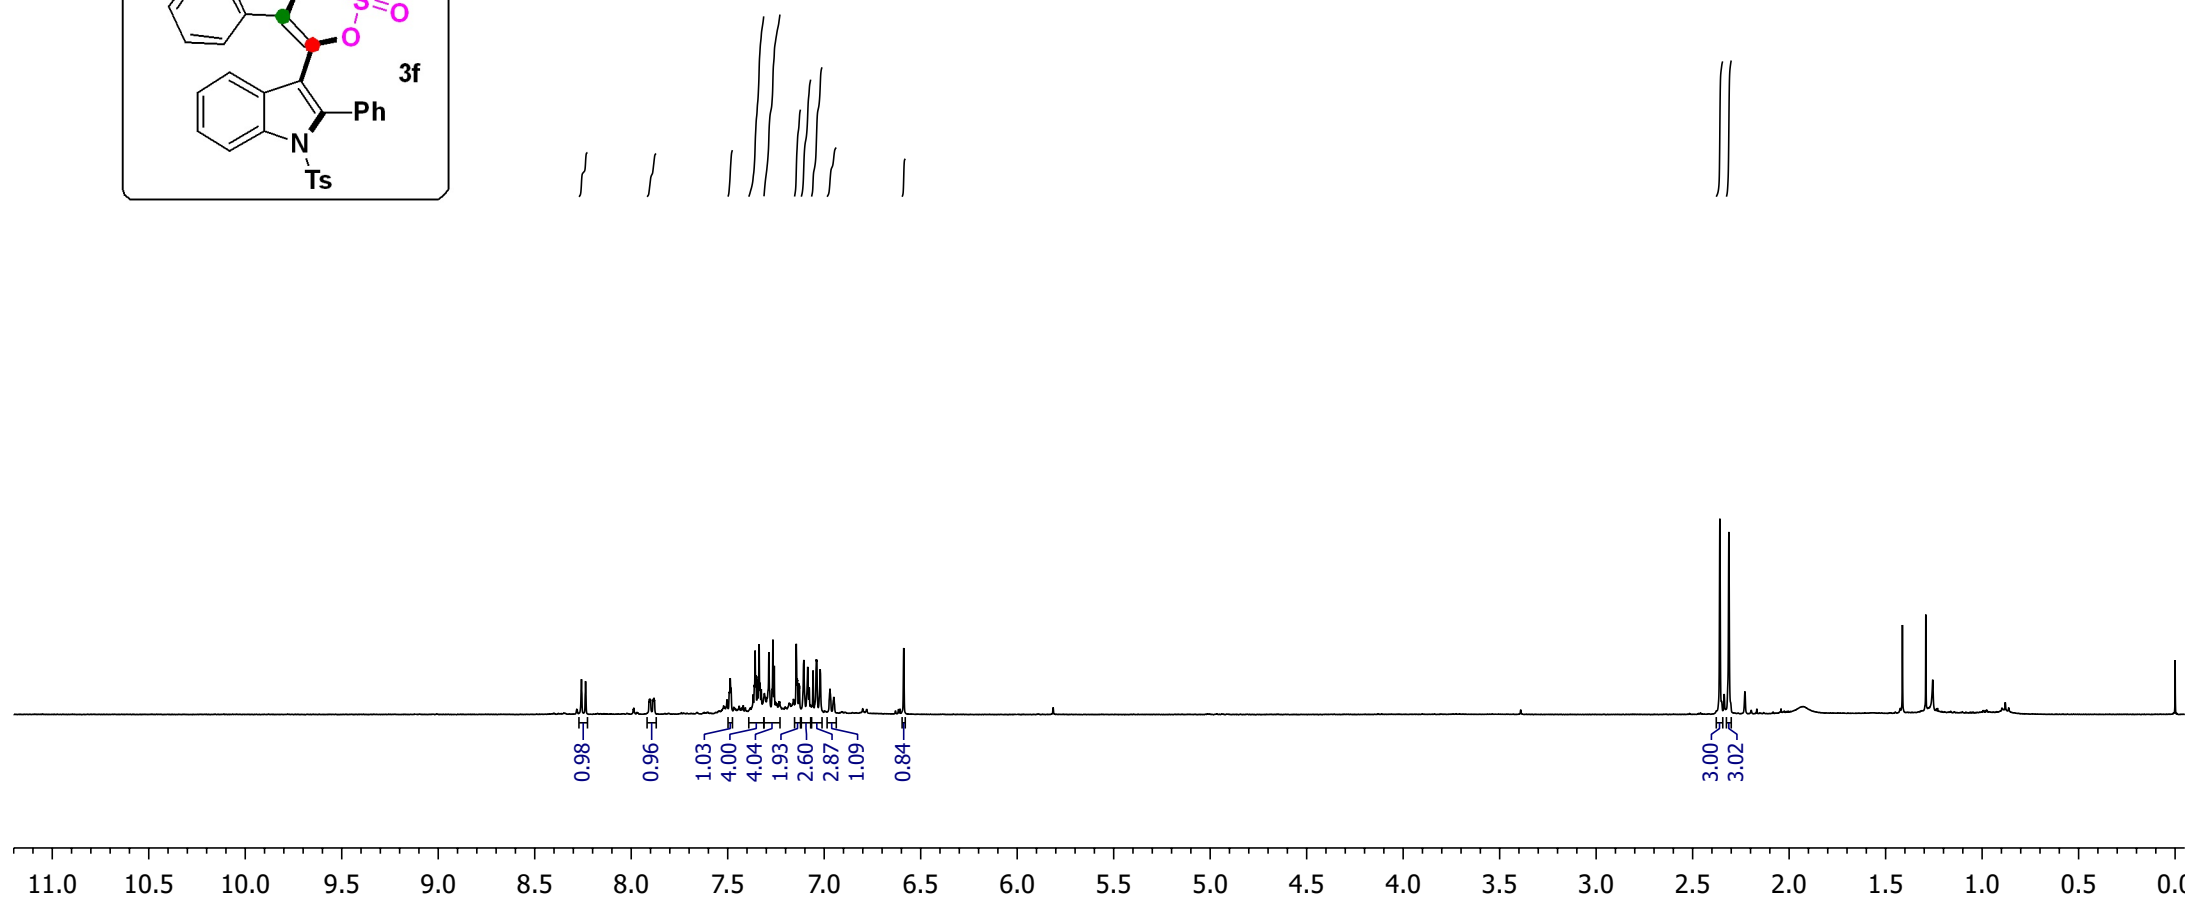

145.13  
145.11  
134.90  
133.69  
130.70  
129.53  
129.45  
129.26  
129.11  
128.96  
127.83  
127.72  
127.25  
126.83  
125.50  
124.50  
123.17  
123.05  
122.12  
120.26  
116.22

77.31  
76.99  
76.67

21.57  
21.55

Solvent  $\text{CDCl}_3$   
Spectrometer Frequency 100.69  
Nucleus  $^{13}\text{C}$

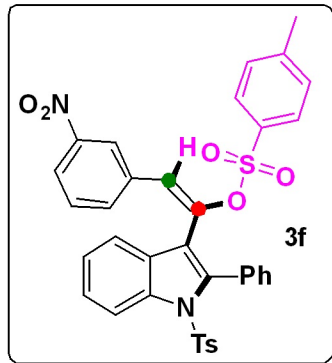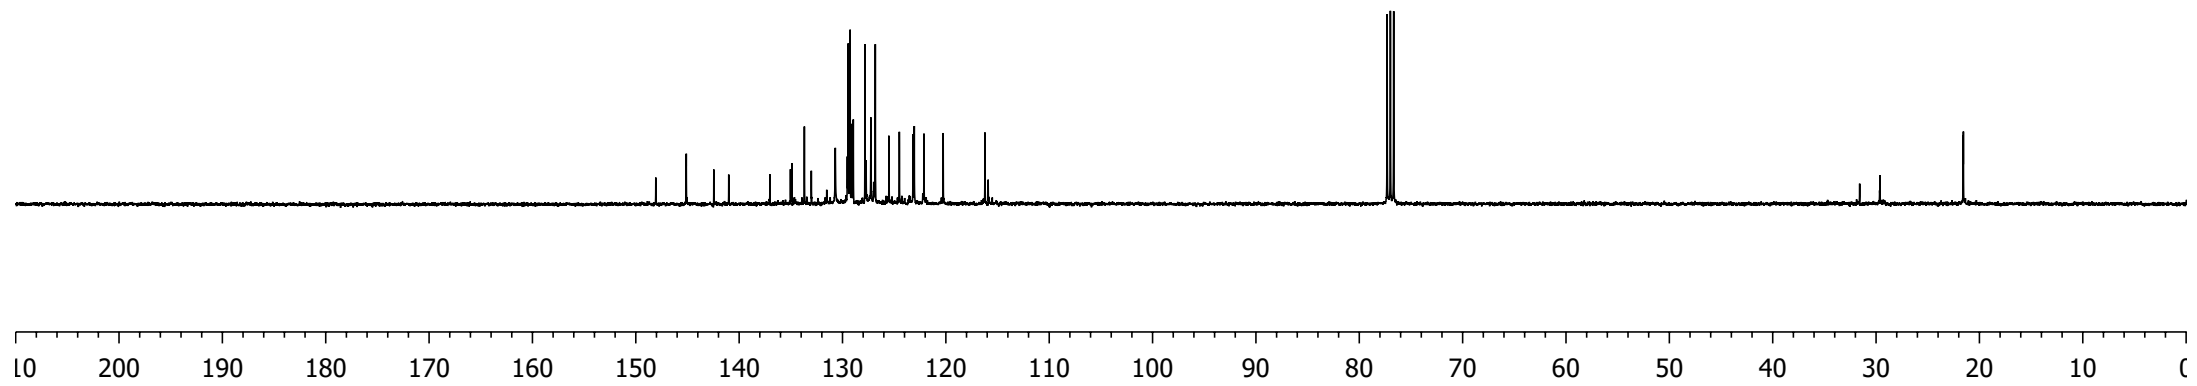

Solvent  $\text{CDCl}_3$   
Spectrometer Frequency 400.39  
Nucleus  $^1\text{H}$

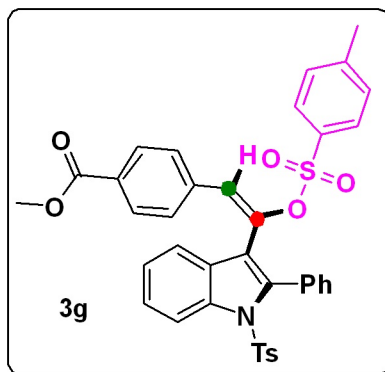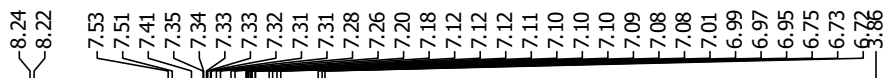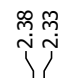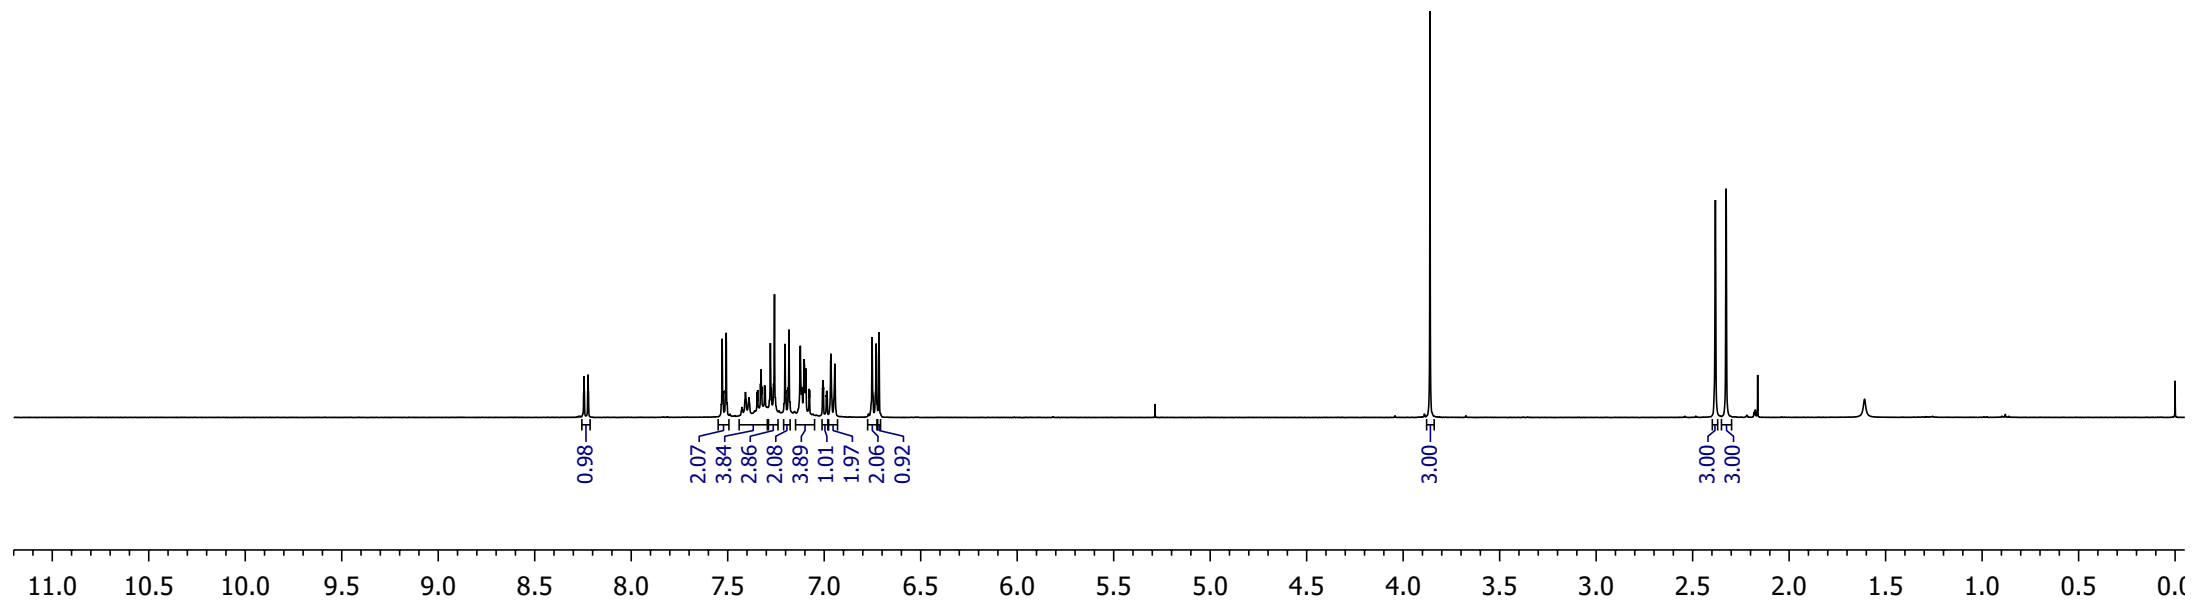

Solvent  $\text{CDCl}_3$   
Spectrometer Frequency 100.69  
Nucleus  $^{13}\text{C}$

166.36  
145.22  
144.80  
141.22  
140.92  
137.41  
137.29  
134.72  
132.97  
129.87  
129.41  
129.38  
129.30  
129.02  
128.87  
128.23  
128.10  
127.72  
127.39  
126.88  
125.50  
125.45  
124.73  
120.49  
117.76  
116.68

77.31  
76.99  
76.67

52.05

21.53  
21.47

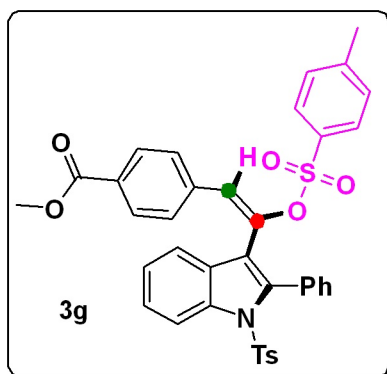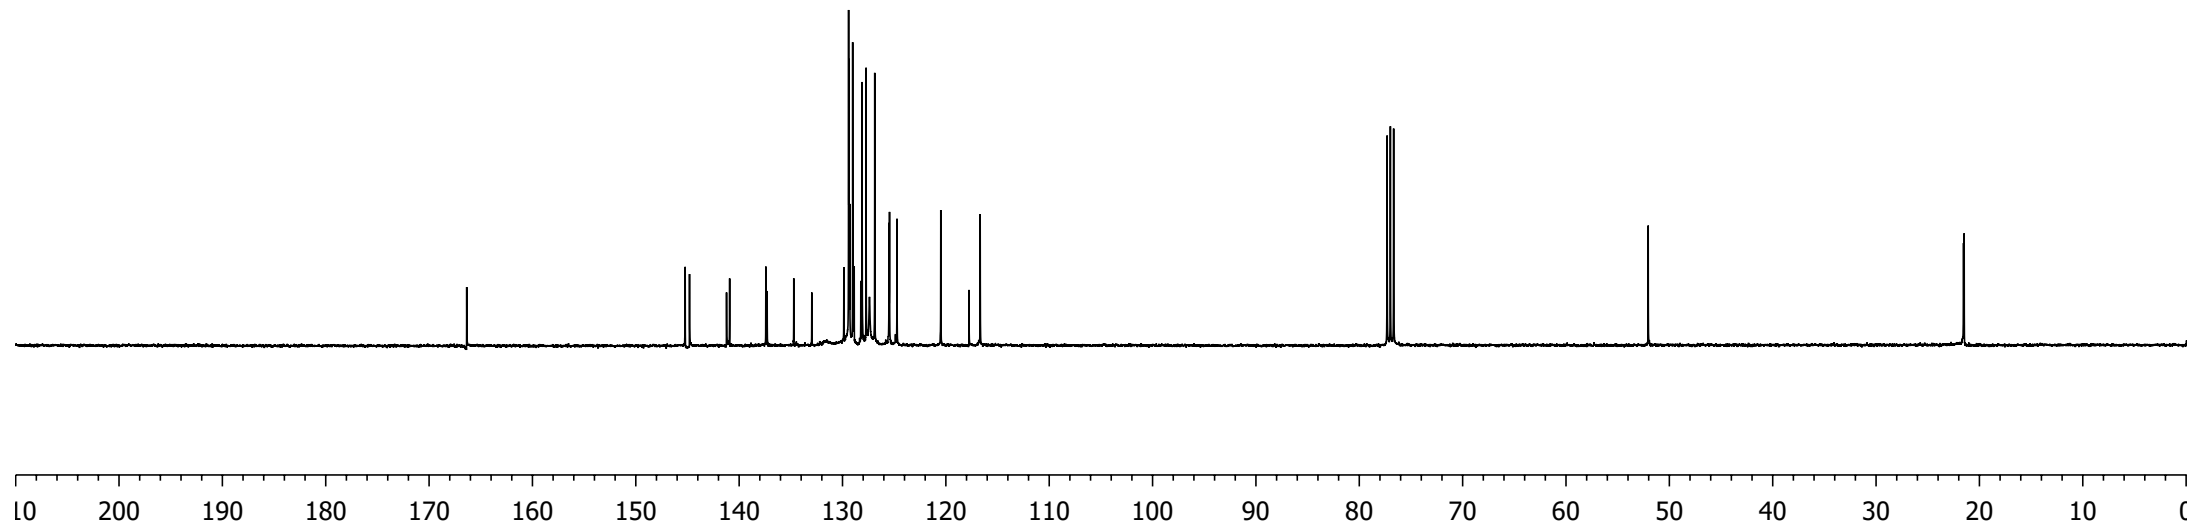

Solvent  $\text{CDCl}_3$   
Spectrometer Frequency 400.39  
Nucleus  $^1\text{H}$

8.24 8.22 7.53 7.51 7.51 7.49 7.39 7.39 7.38 7.37 7.34 7.34 7.33 7.32 7.31 7.30 7.29 7.28 7.26 7.25 7.24 7.23 7.22 7.12 7.12 7.10 7.10 7.09 7.08 7.07 7.05 7.05 7.05 7.03 7.03 6.97 6.95 6.91 6.89 6.87 6.69 6.67 6.65 2.95

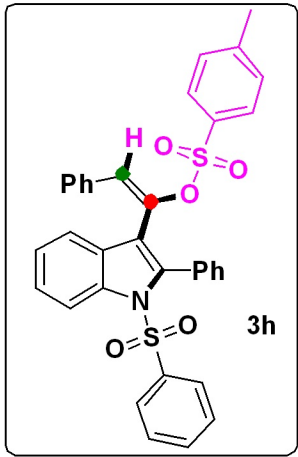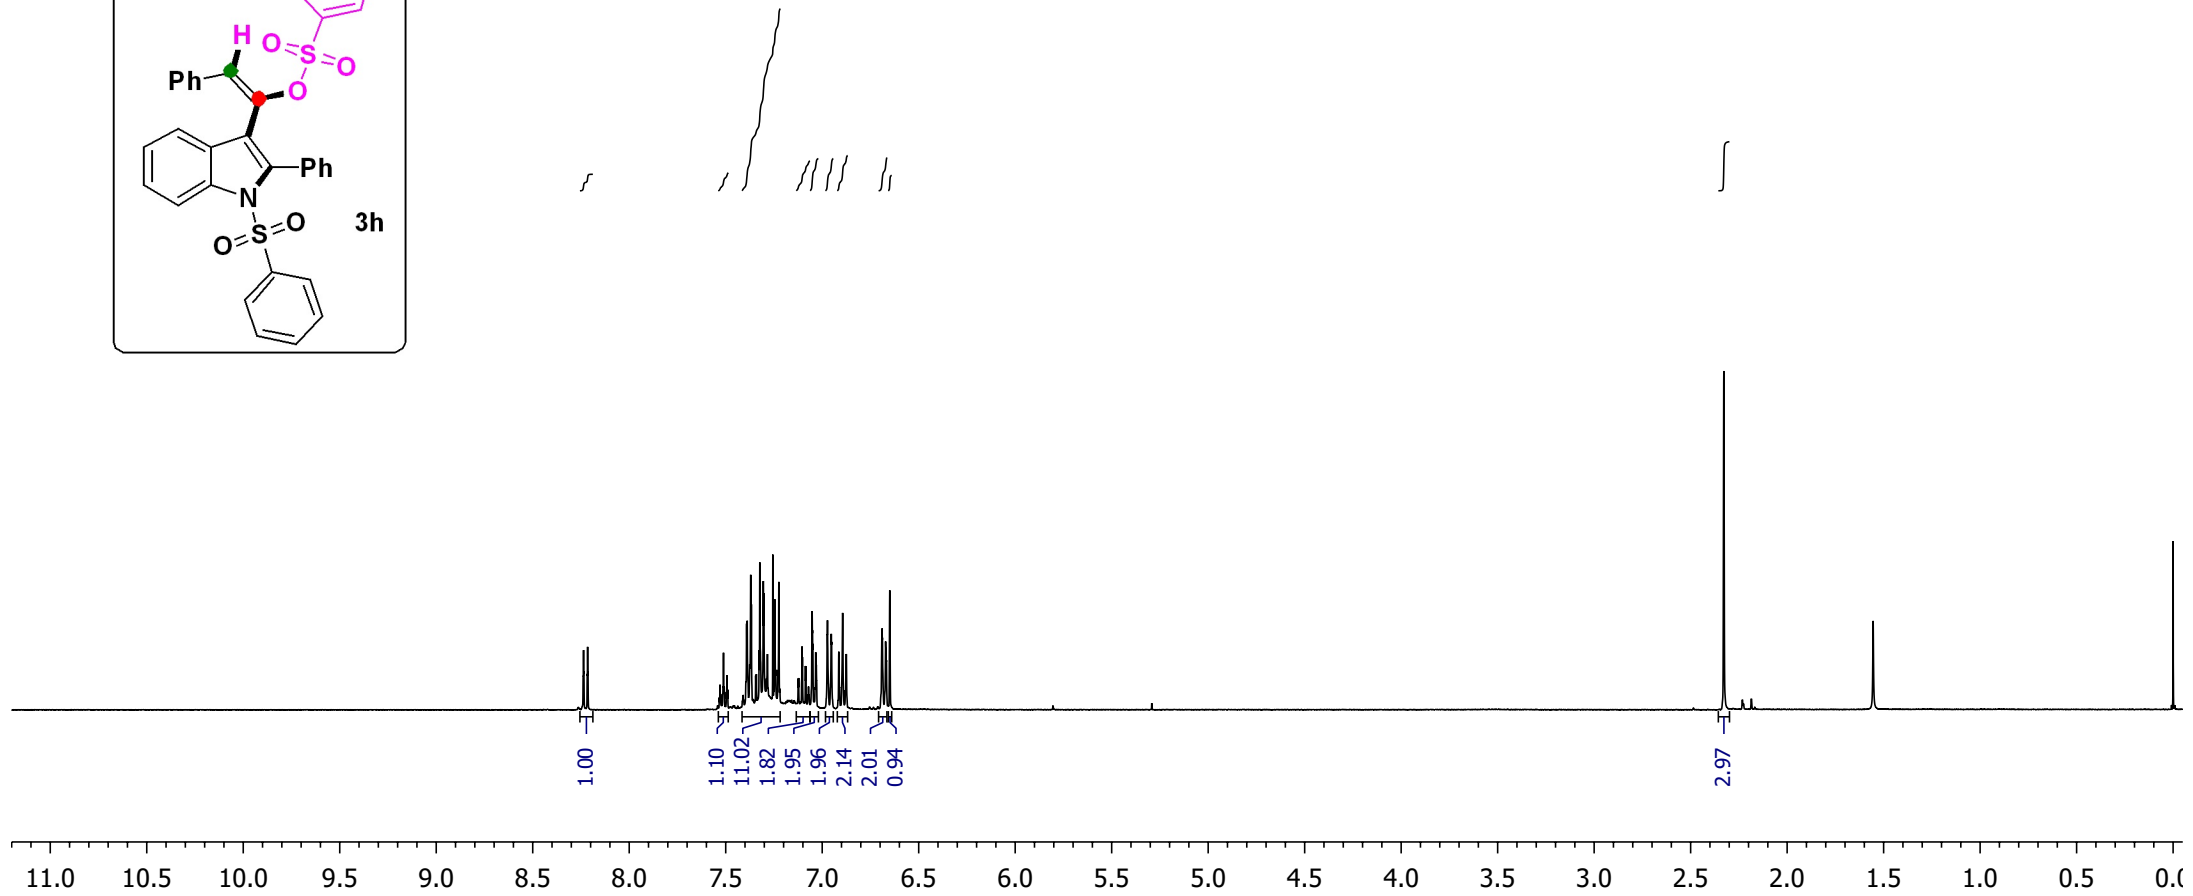

144.65  
140.89  
139.02  
137.83  
137.22  
133.79  
133.13  
132.67  
129.90  
129.20  
129.00  
128.71  
128.40  
128.26  
128.24  
127.80  
127.72  
127.33  
126.82  
126.78  
125.35  
124.59  
120.81  
118.14  
116.41

77.31  
76.99  
76.67

21.55

Solvent  $\text{CDCl}_3$   
Spectrometer Frequency 100.69  
Nucleus  $^{13}\text{C}$

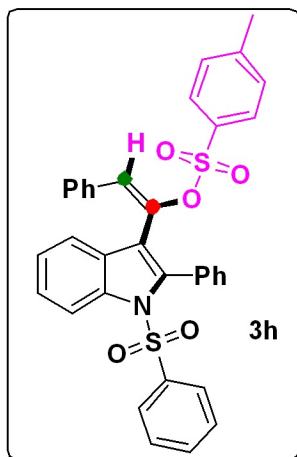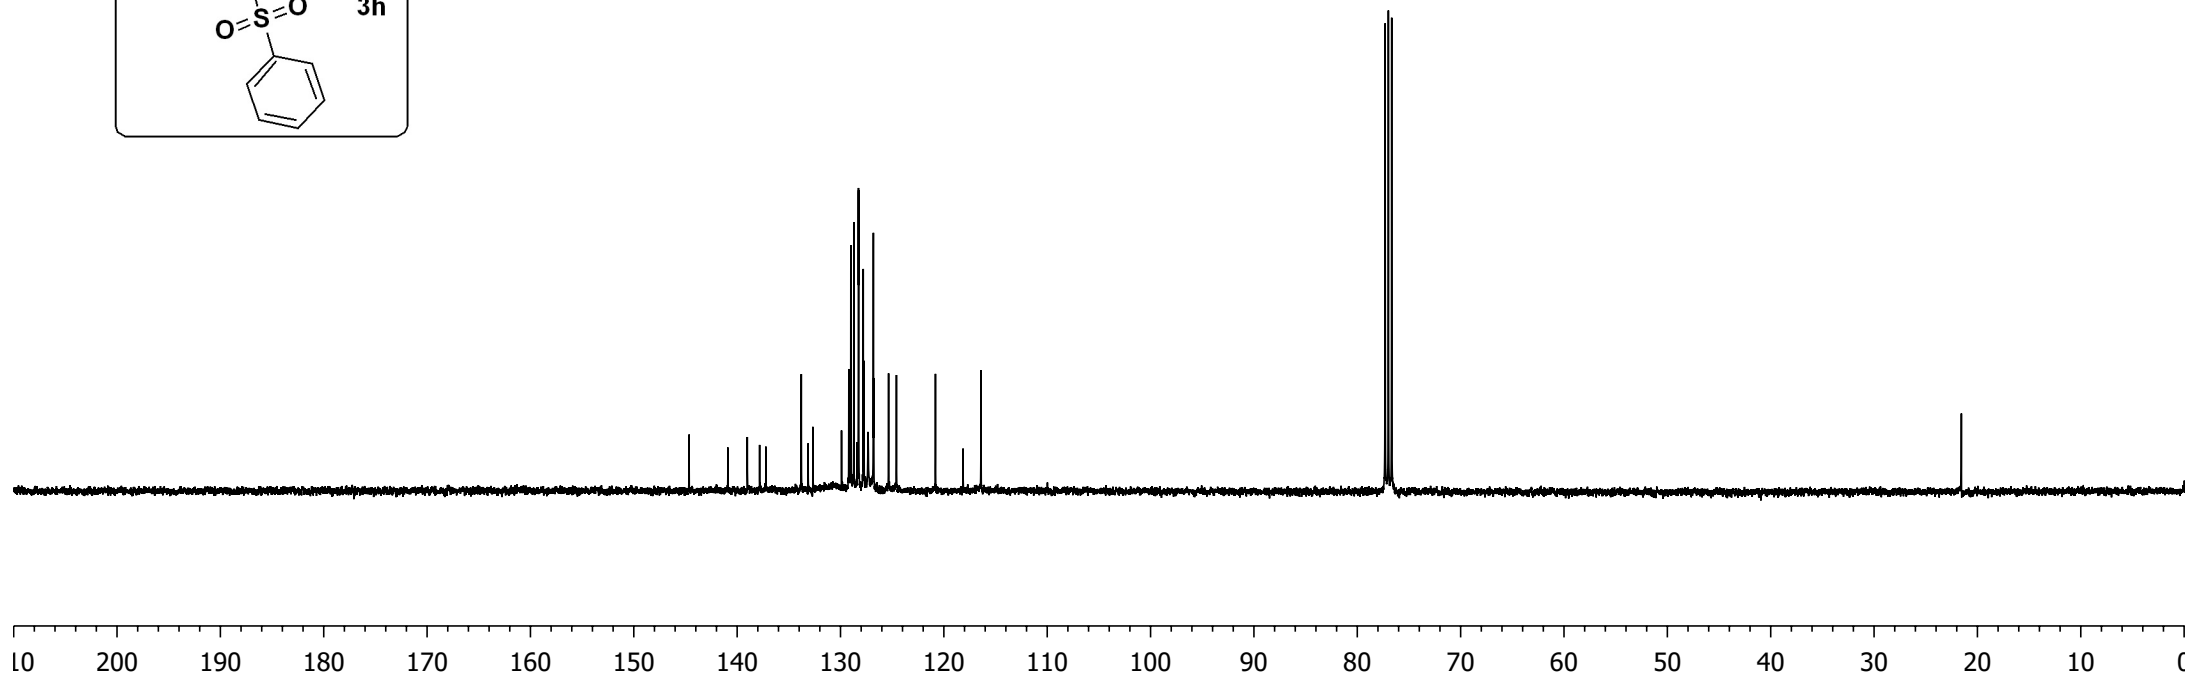

MC-20-6

Pulse Sequence: s2pu1  
Mercury-400BB "MerPlus400"  
Date: Jun 20 2024  
Solvent: cdcl3  
Ambient temperature  
Total 32 repetitions

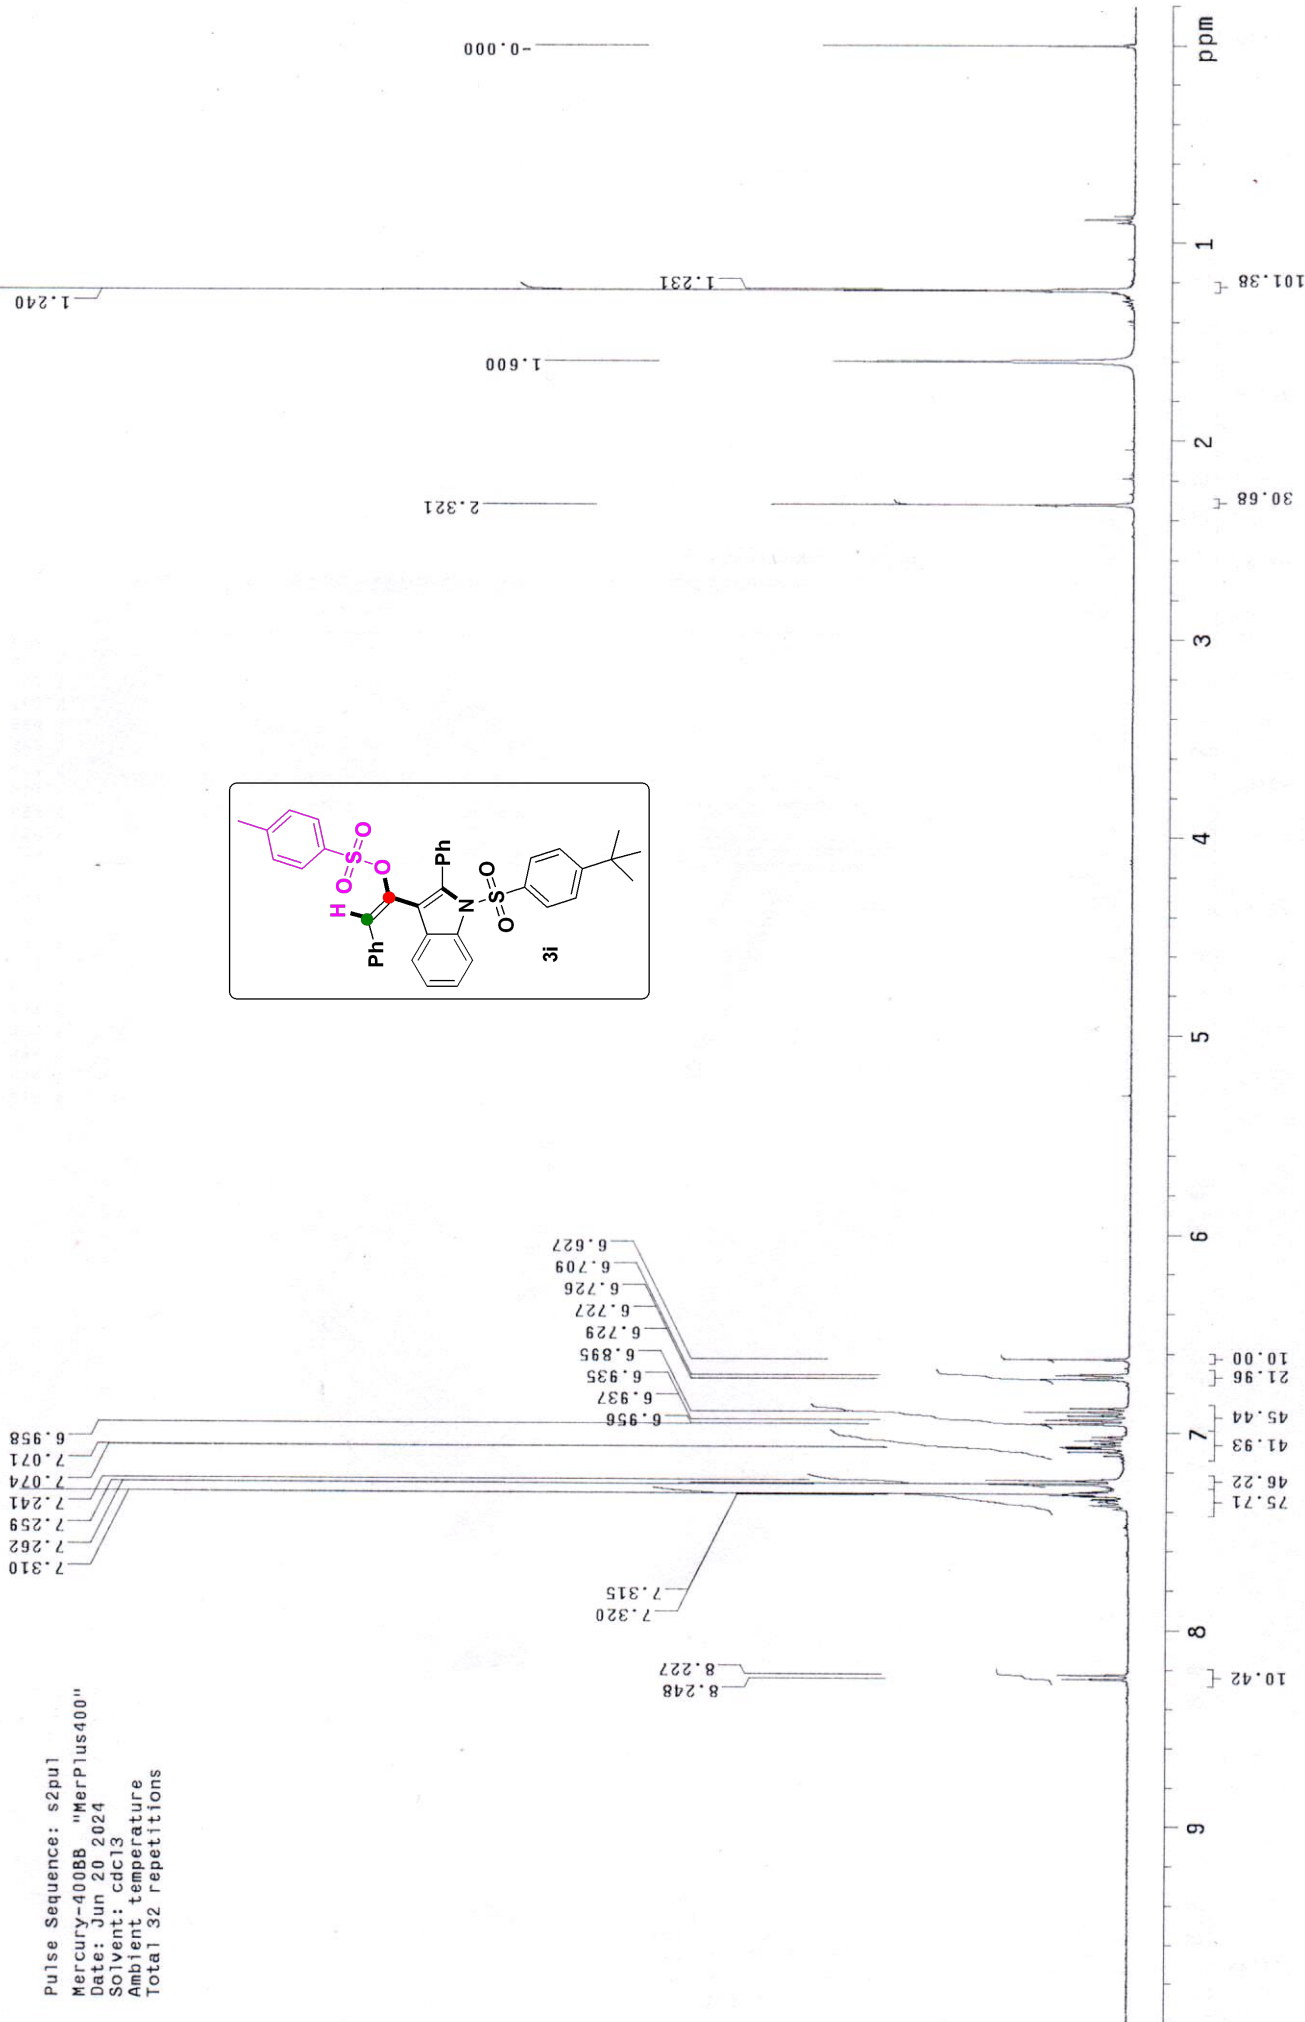



157.80  
144.63  
140.73  
139.39  
137.06  
135.31  
133.21  
132.82  
129.90  
129.02  
128.31  
128.23  
128.18  
127.85  
127.60  
127.22  
126.79  
126.45  
125.78  
125.22  
124.32  
120.71  
116.16

77.31  
76.99  
76.67

35.22

30.93

21.53

Solvent  $\text{CDCl}_3$   
Spectrometer Frequency 100.69  
Nucleus  $^{13}\text{C}$

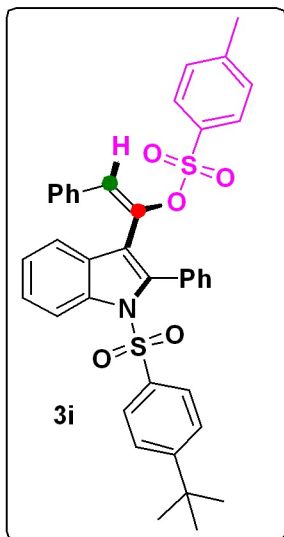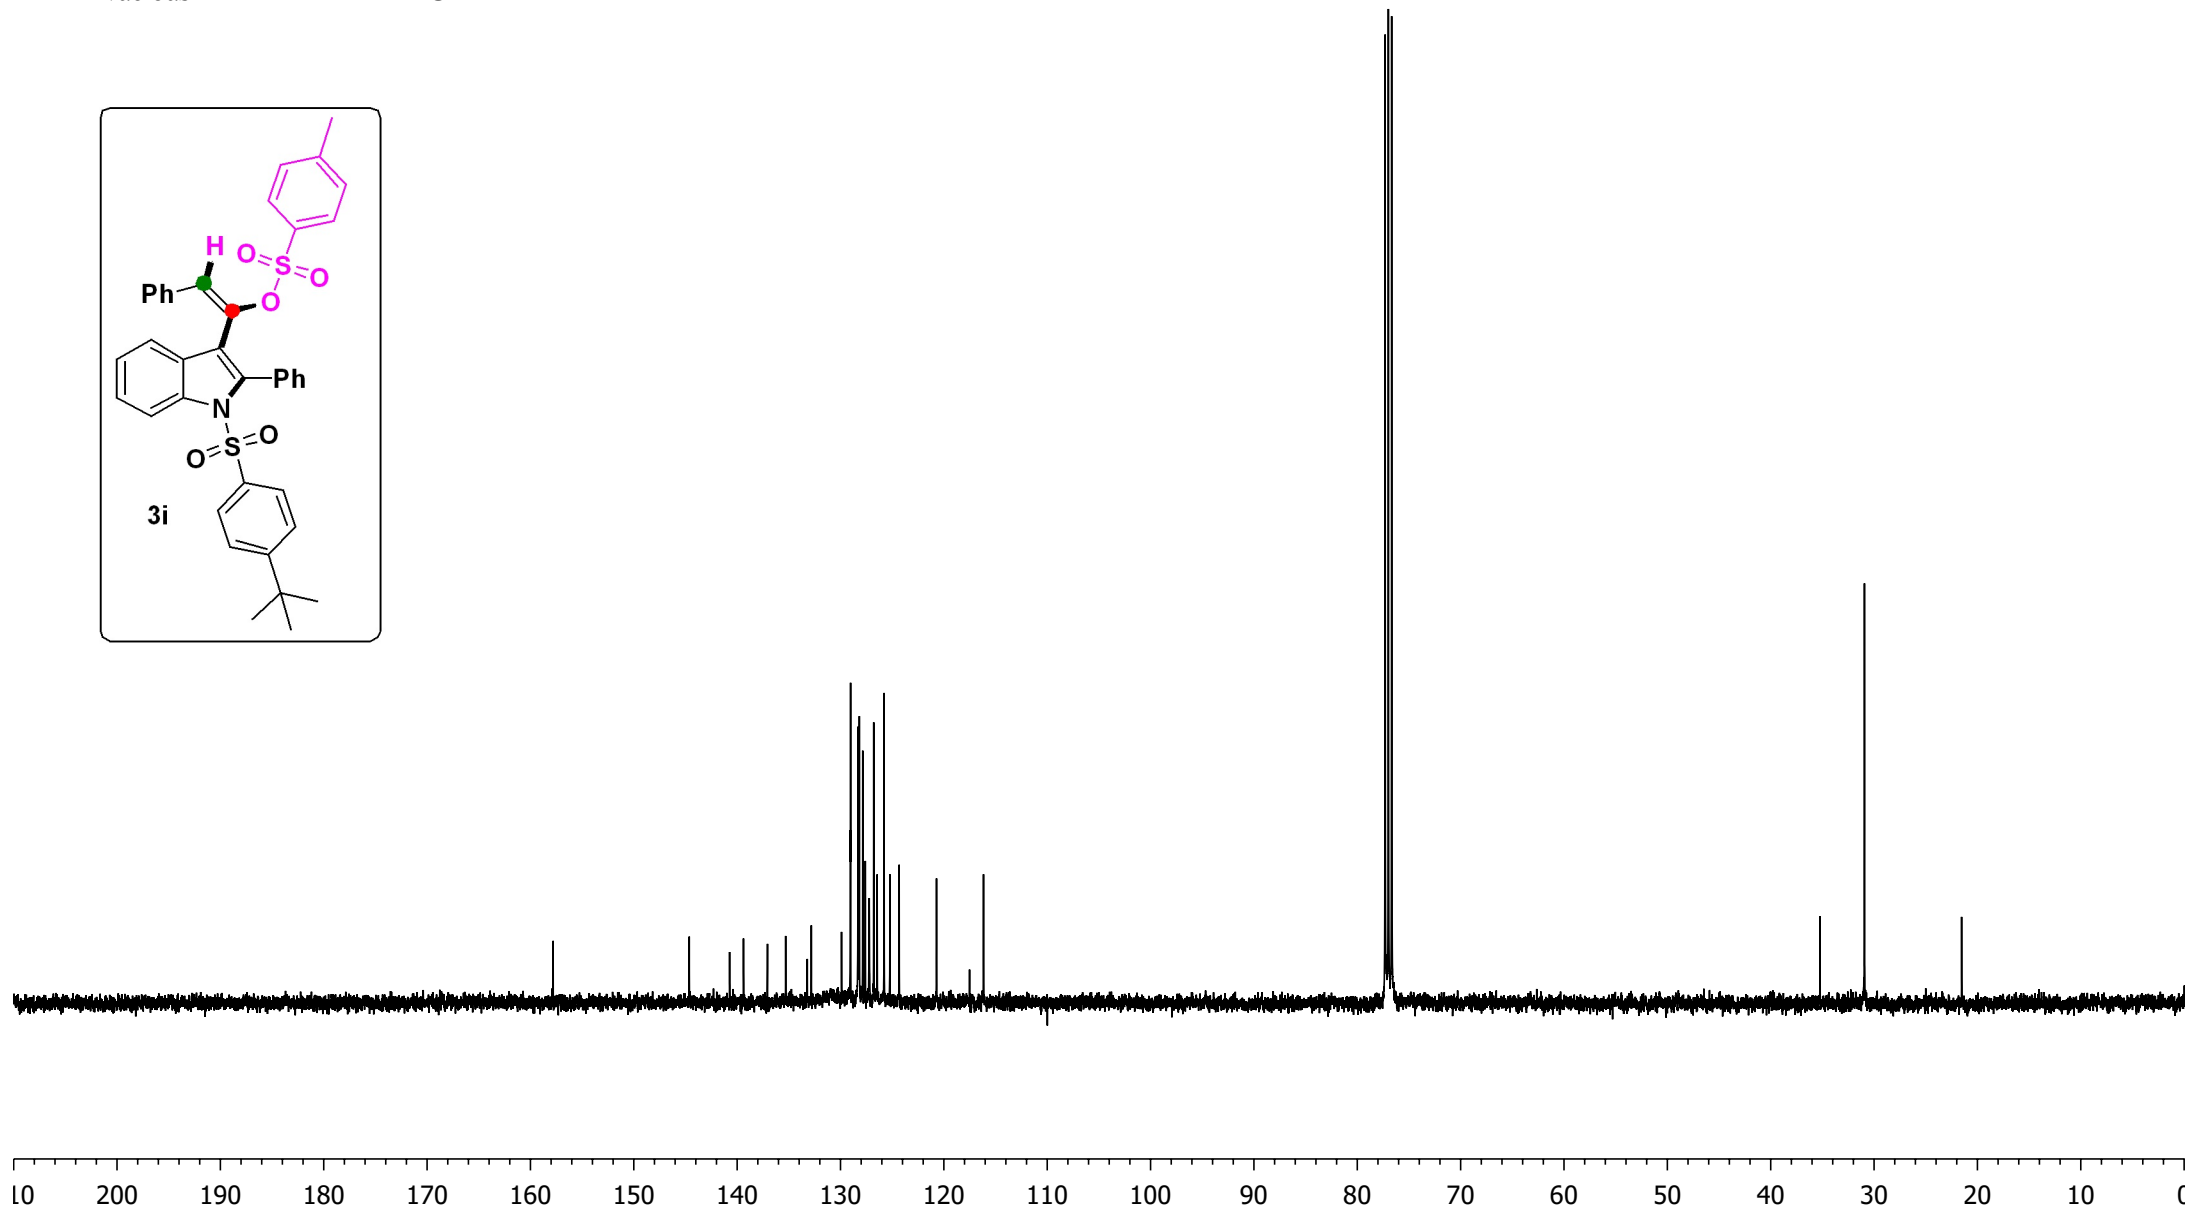

Solvent  $\text{CDCl}_3$   
Spectrometer Frequency 400.39  
Nucleus  $^1\text{H}$

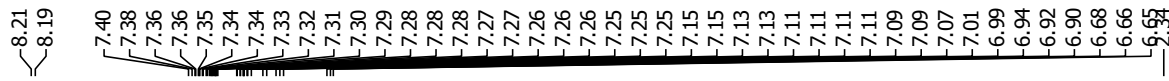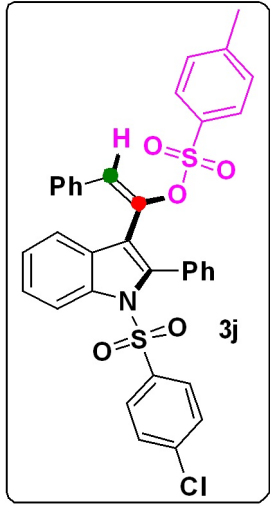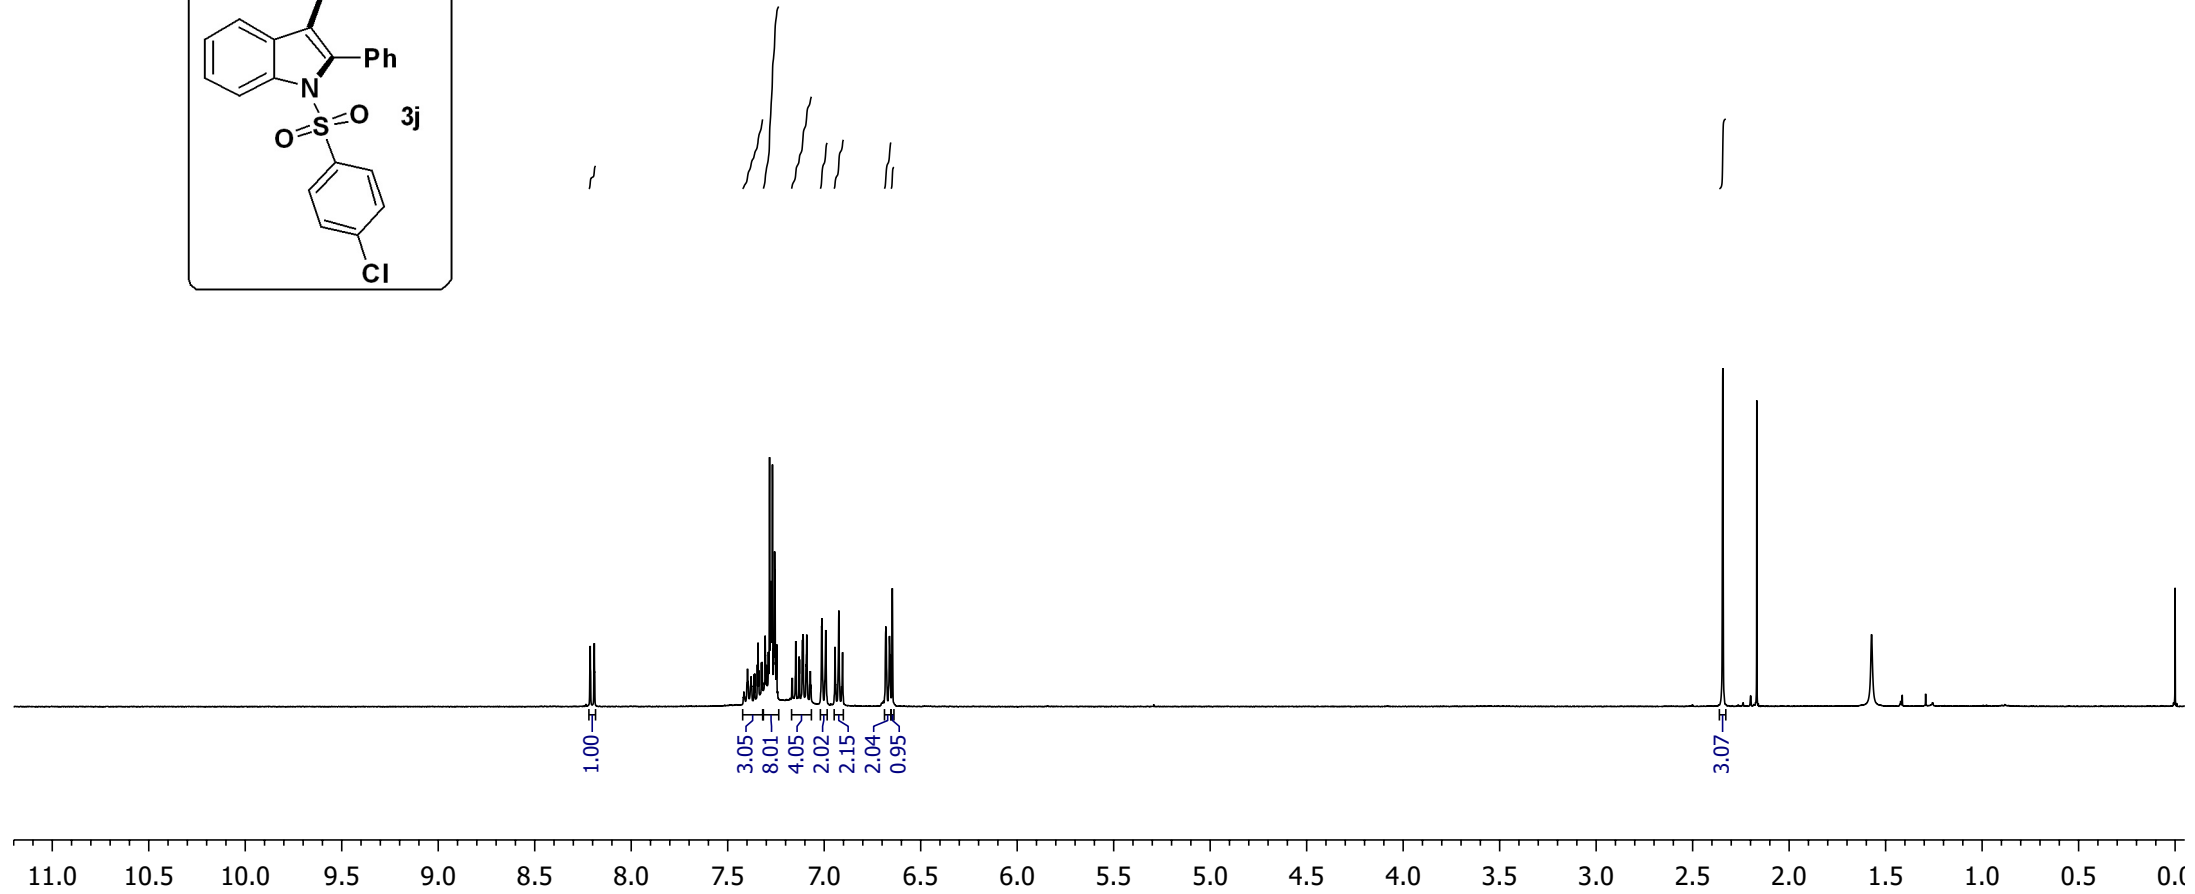

144.73  
140.73  
140.53  
138.83  
137.15  
135.96  
133.12  
132.63  
129.80  
129.31  
129.06  
129.04  
128.69  
128.25  
128.24  
128.19  
127.92  
127.80  
127.41  
126.93  
125.57  
124.90  
120.96  
118.59  
116.46

77.31  
76.99  
76.68

21.56

Solvent  $\text{CDCl}_3$   
Spectrometer Frequency 100.69  
Nucleus  $^{13}\text{C}$

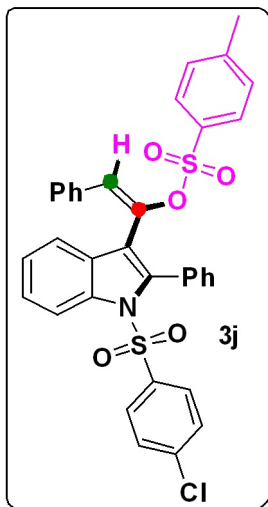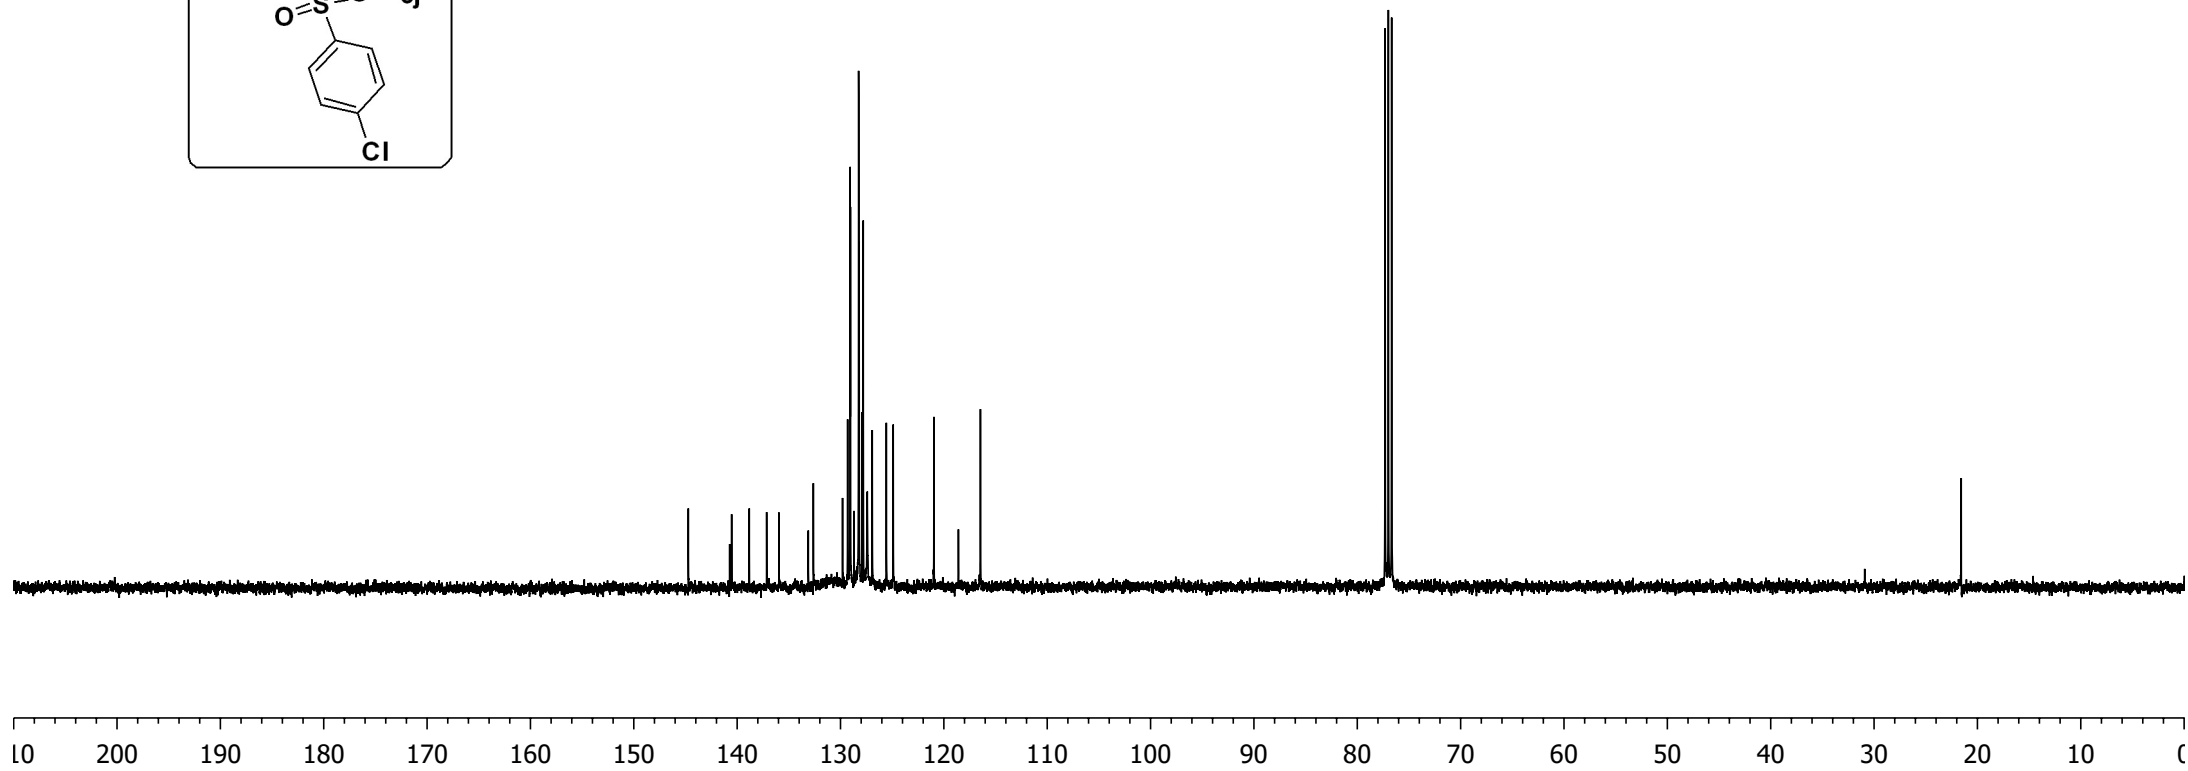

Solvent  $\text{CDCl}_3$   
Spectrometer Frequency 400.39  
Nucleus  $^1\text{H}$

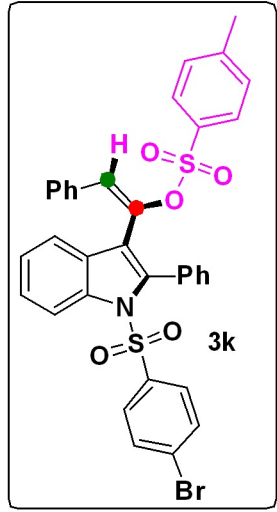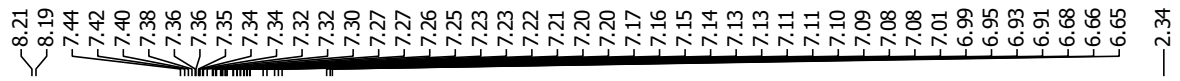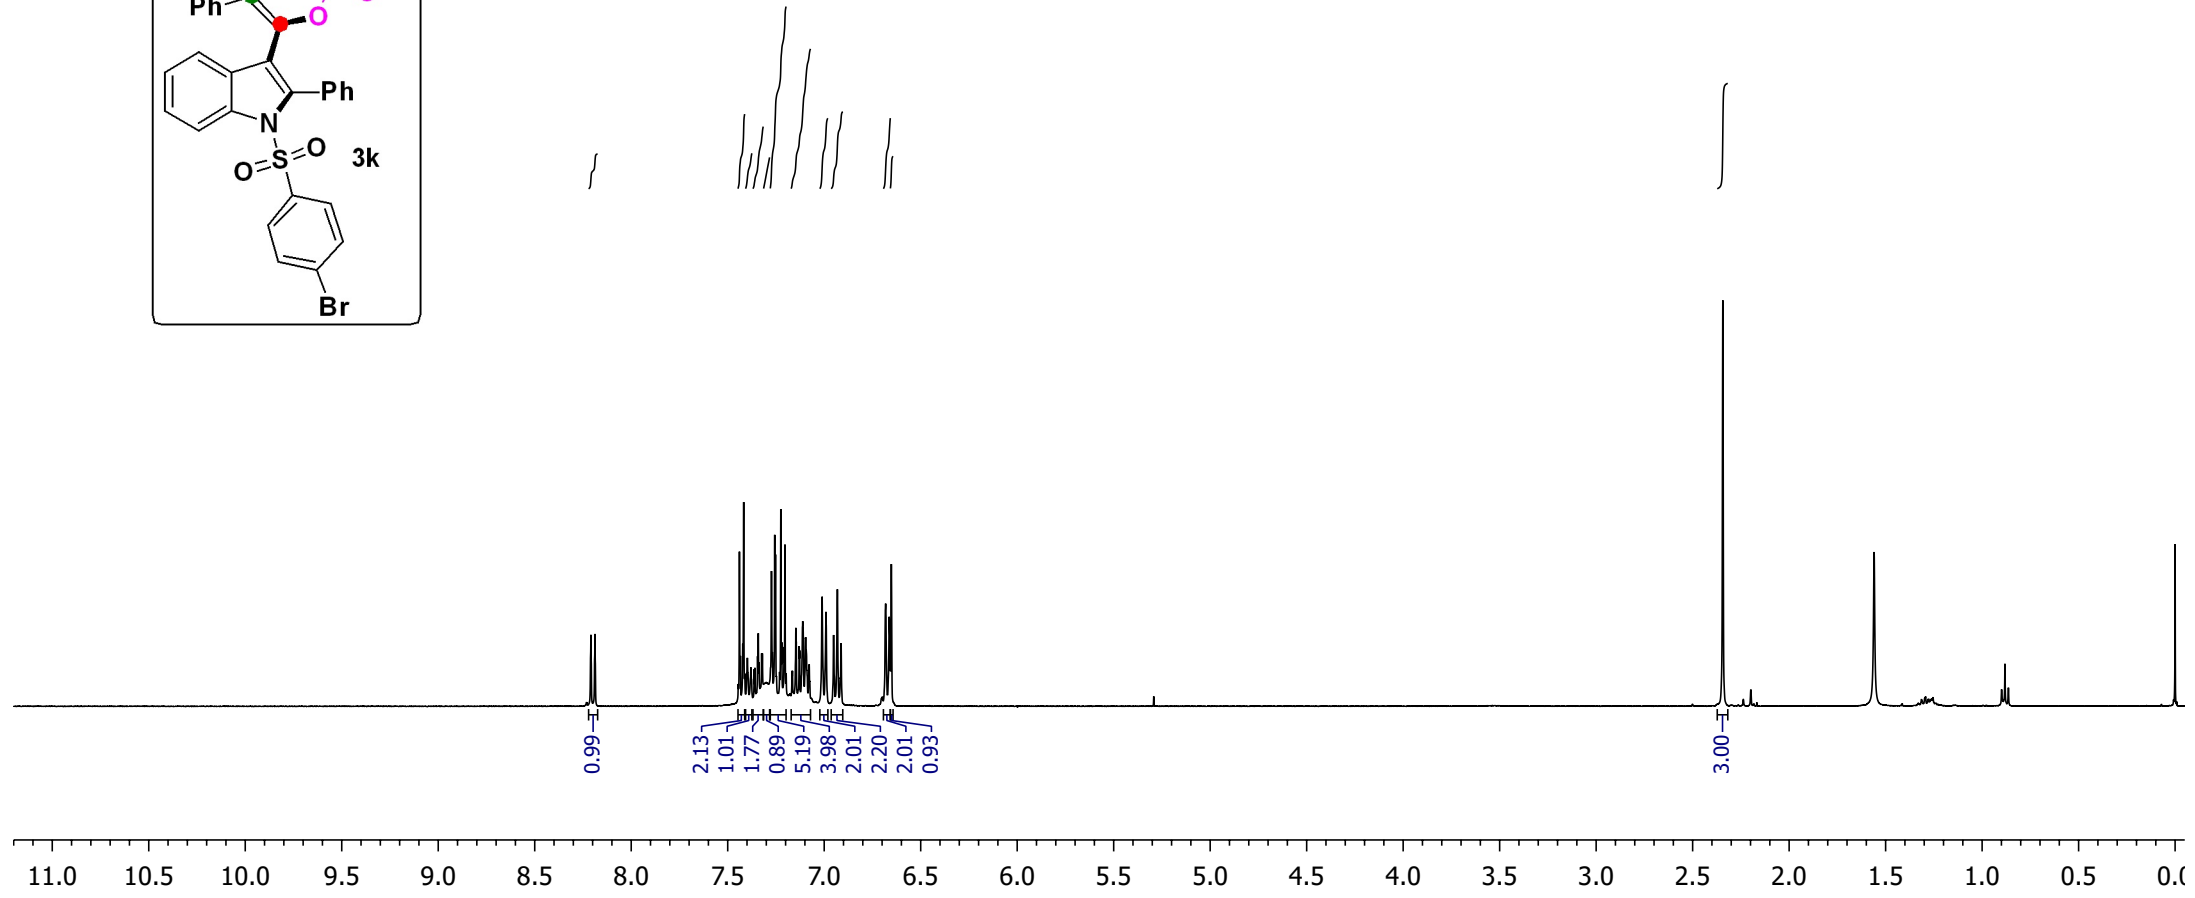

144.72  
140.71  
138.81  
137.14  
136.50  
133.13  
132.63  
132.03  
129.81  
129.32  
129.18  
129.07  
128.71  
128.29  
128.26  
128.19  
127.93  
127.80  
127.42  
126.95  
125.58  
124.91  
120.97  
118.62  
116.46

77.31  
76.99  
76.67

21.56

Solvent  $\text{CDCl}_3$   
Spectrometer Frequency 100.69  
Nucleus  $^{13}\text{C}$

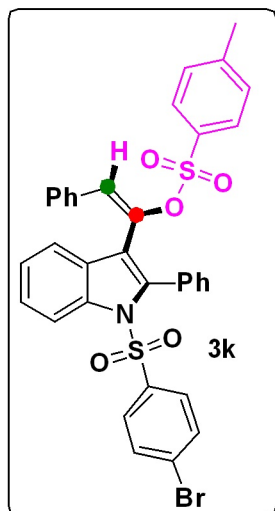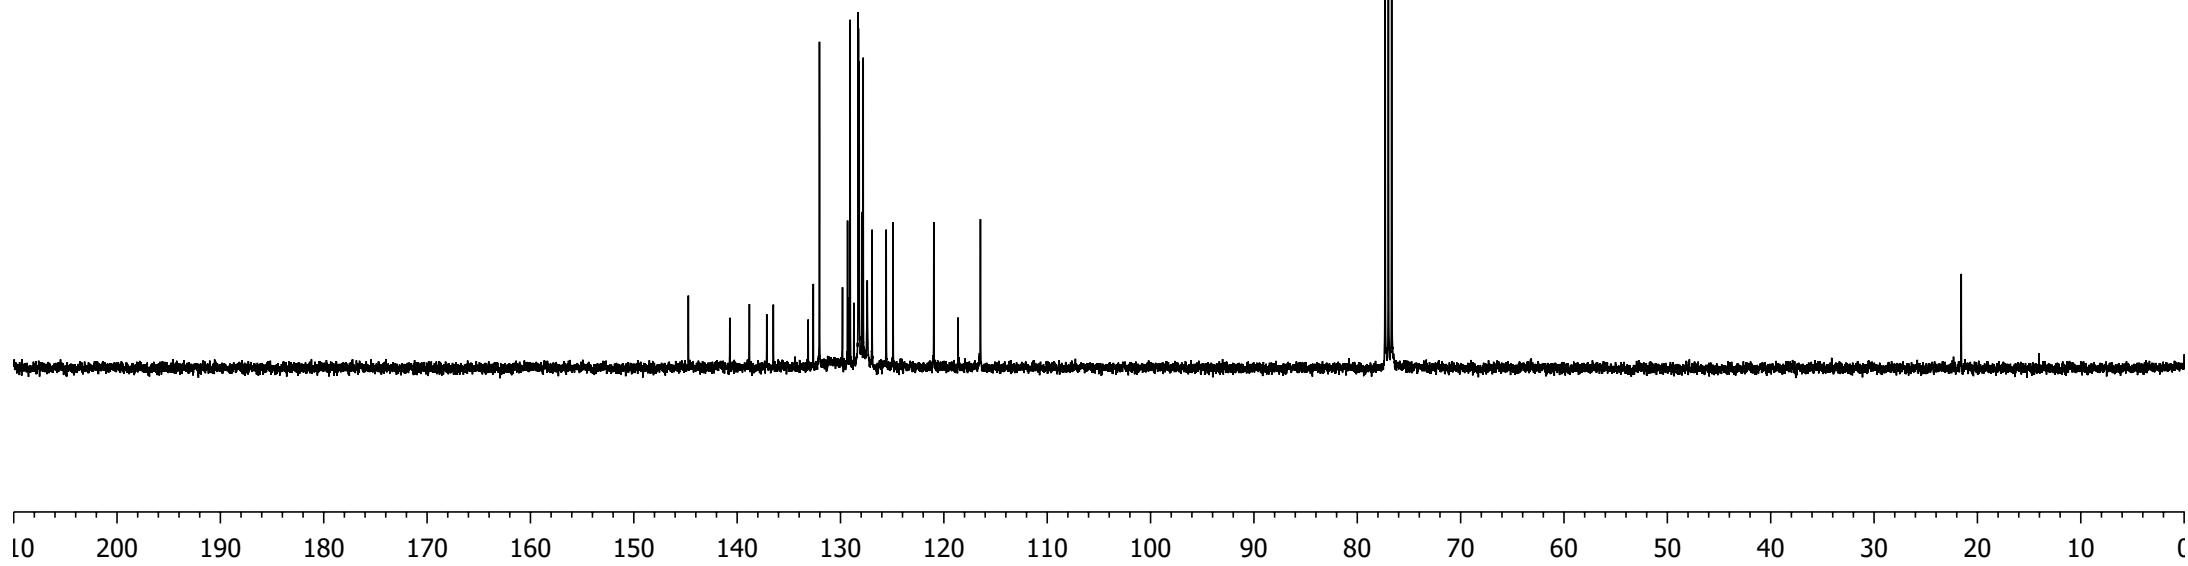

Solvent  $\text{CDCl}_3$   
Spectrometer Frequency 400.39  
Nucleus  $^1\text{H}$

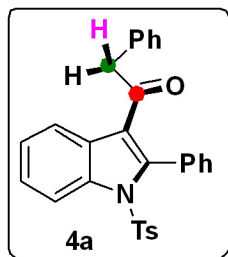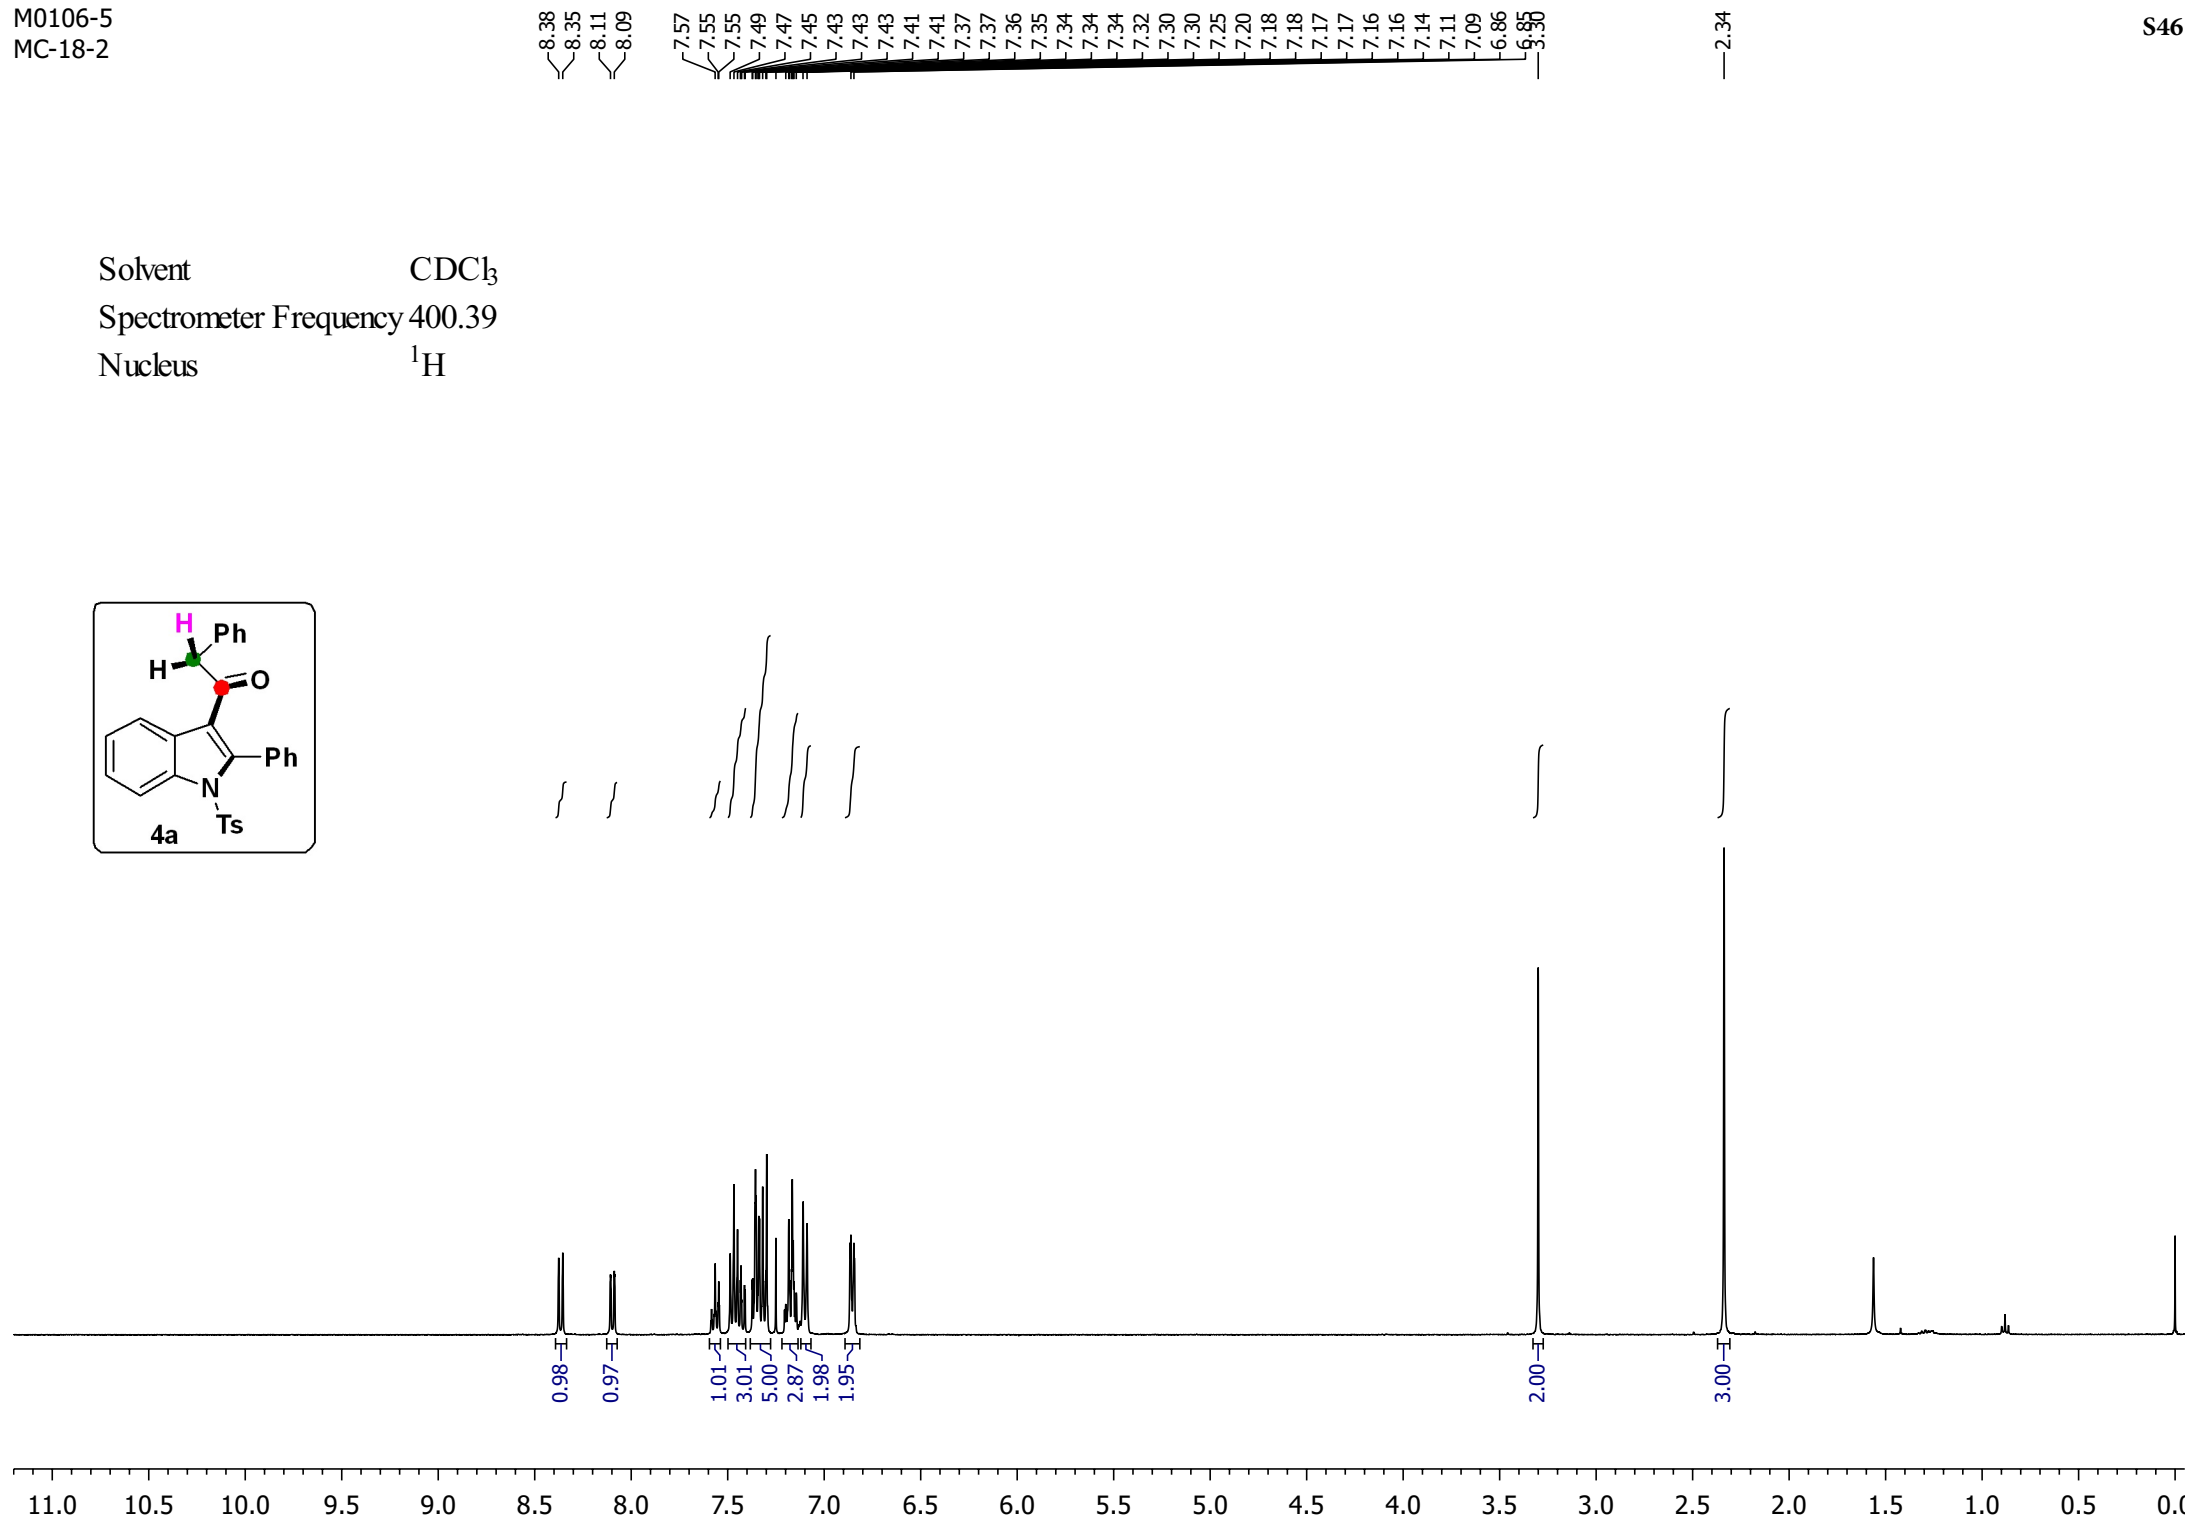

M0106-6  
MC-18-2

— 196.80  
—

— 145.40  
— 142.97  
— 131.75  
— 130.21  
— 129.58  
— 129.36  
— 128.23  
— 127.85  
— 126.93  
— 126.64  
— 125.88  
— 125.04

— 77.31  
— 76.99  
— 76.67

— 48.40

— 21.58

S47

Solvent  $\text{CDCl}_3$   
Spectrometer Frequency 100.69  
Nucleus  $^{13}\text{C}$

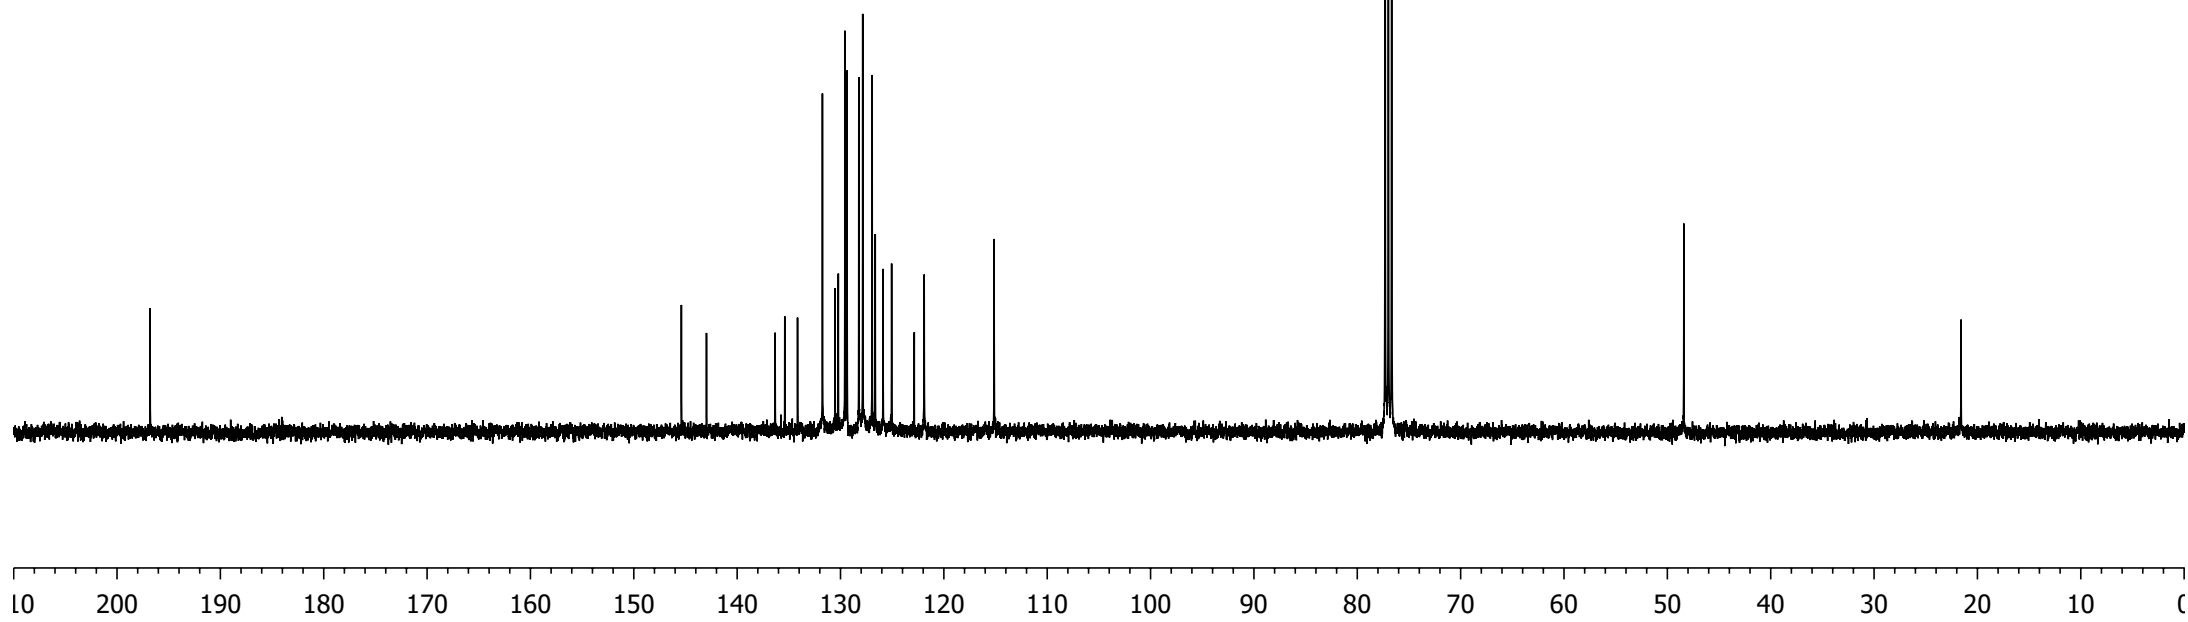

Solvent  $\text{CDCl}_3$   
Spectrometer Frequency 400.28  
Nucleus  $^1\text{H}$

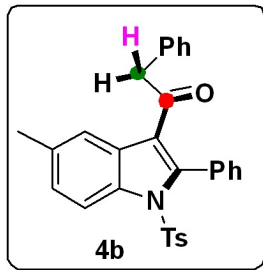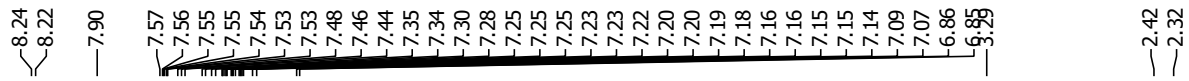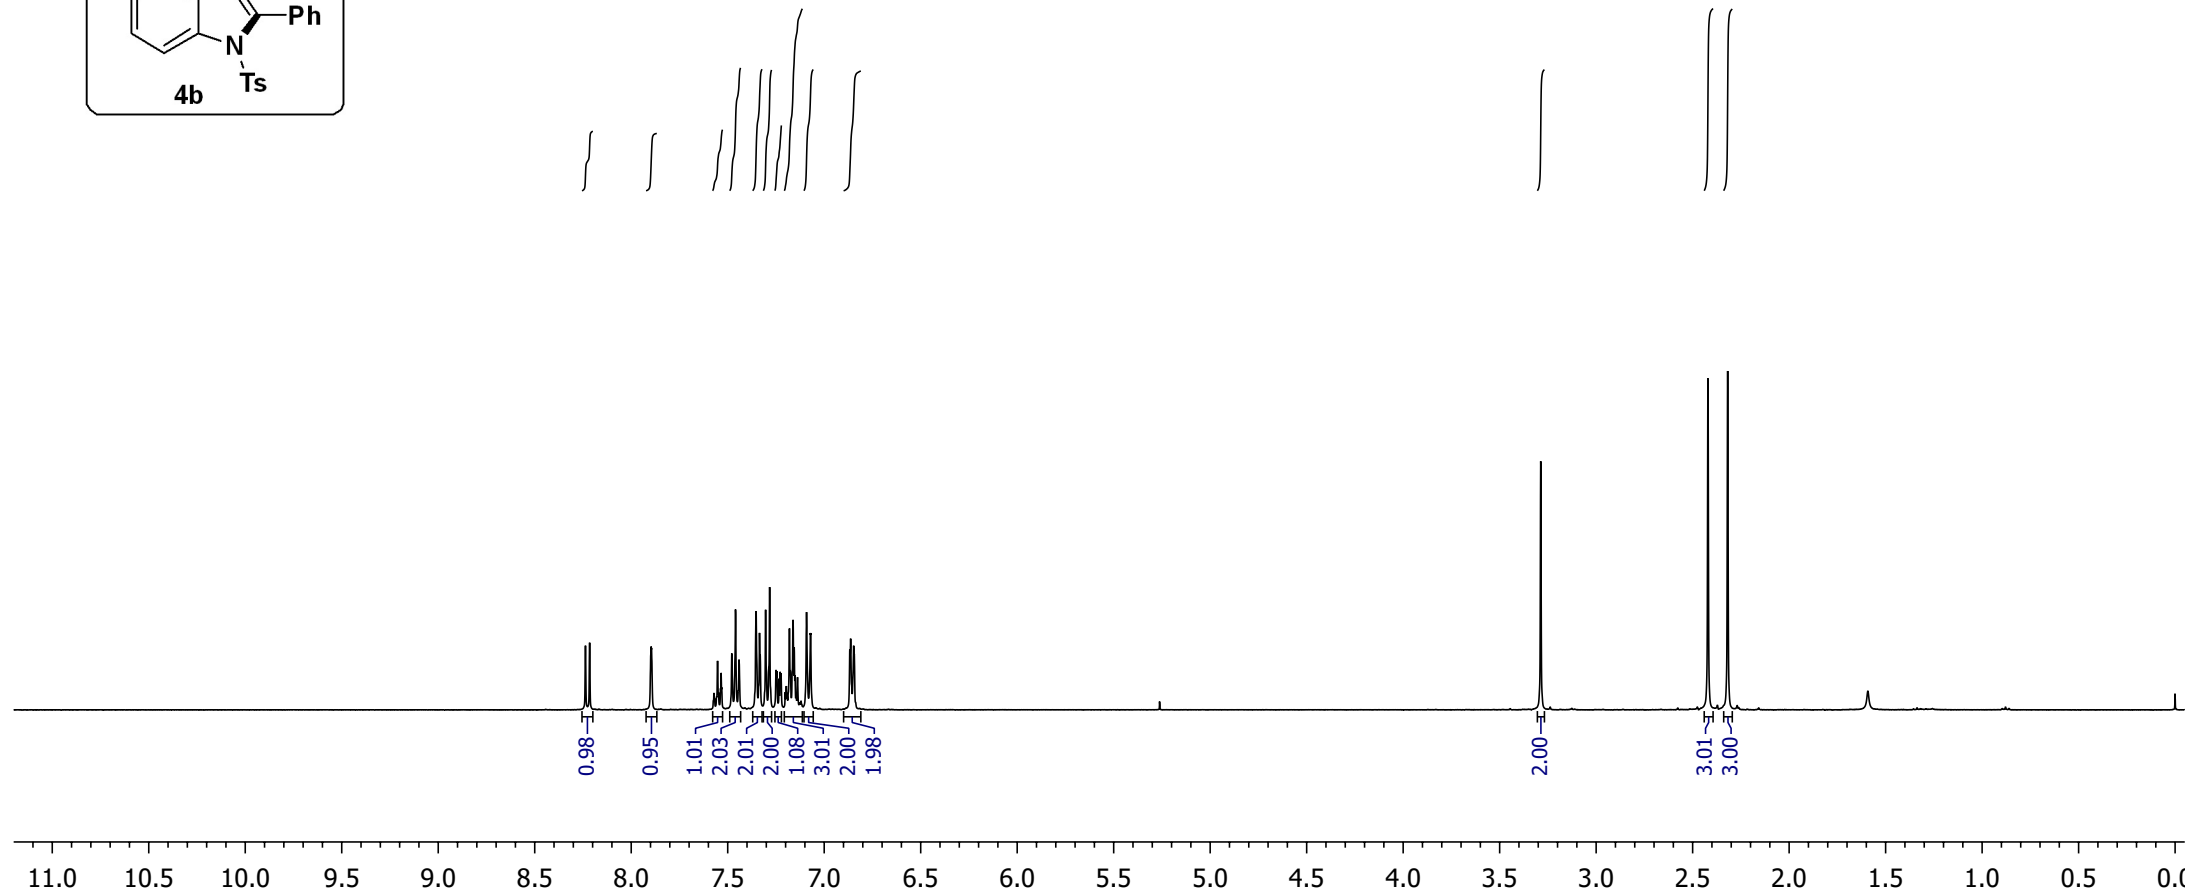



U0220-6  
MC-20-12

—196.96

—145.27  
—143.06  
131.73  
130.14  
129.51  
129.36  
128.18  
127.81  
127.23  
126.87  
126.58  
124.99

77.31  
77.00  
76.68

—48.34

21.53  
21.29

S49

Solvent  $\text{CDCl}_3$   
Spectrometer Frequency 100.66  
Nucleus  $^{13}\text{C}$

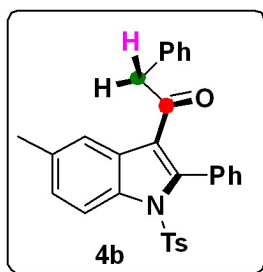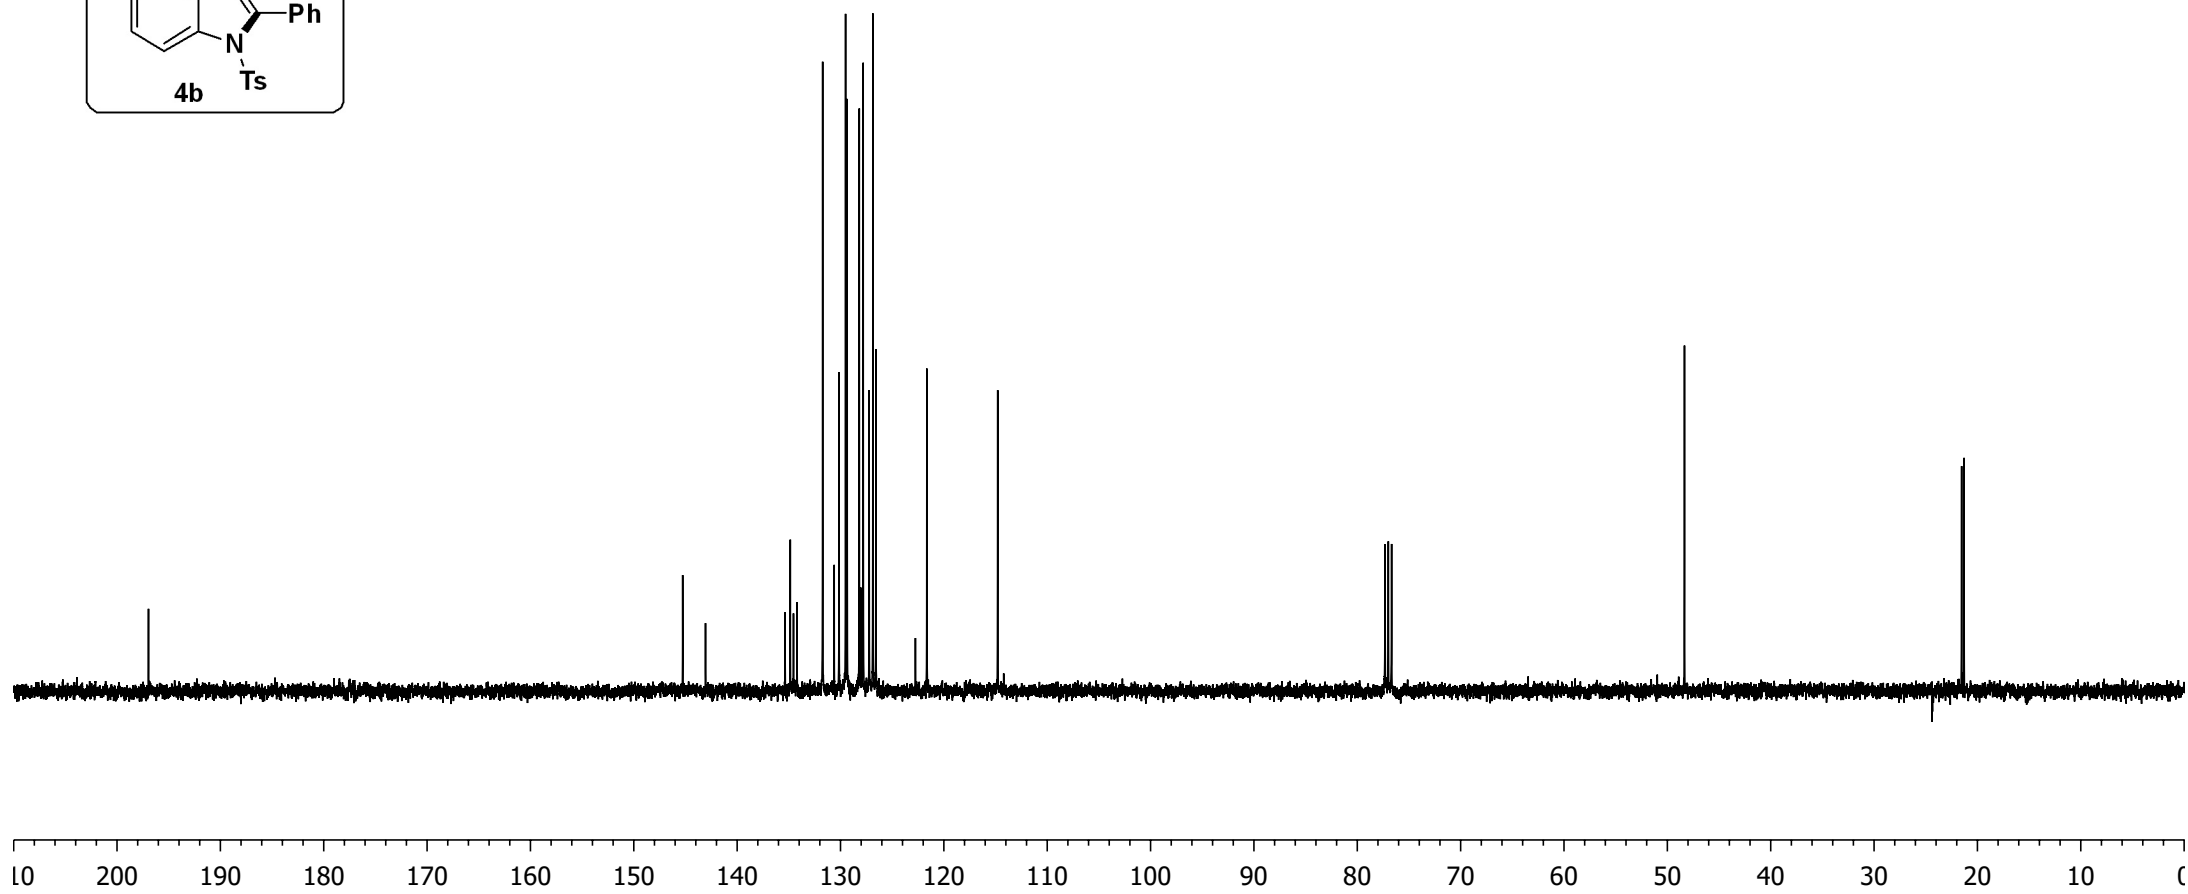

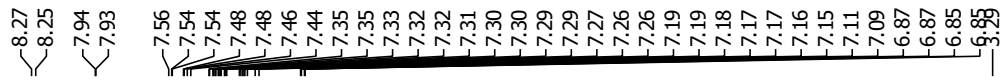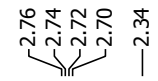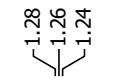

Solvent  $\text{CDCl}_3$   
Spectrometer Frequency 400.39  
Nucleus  $^1\text{H}$

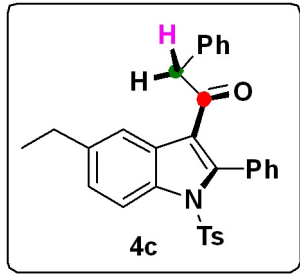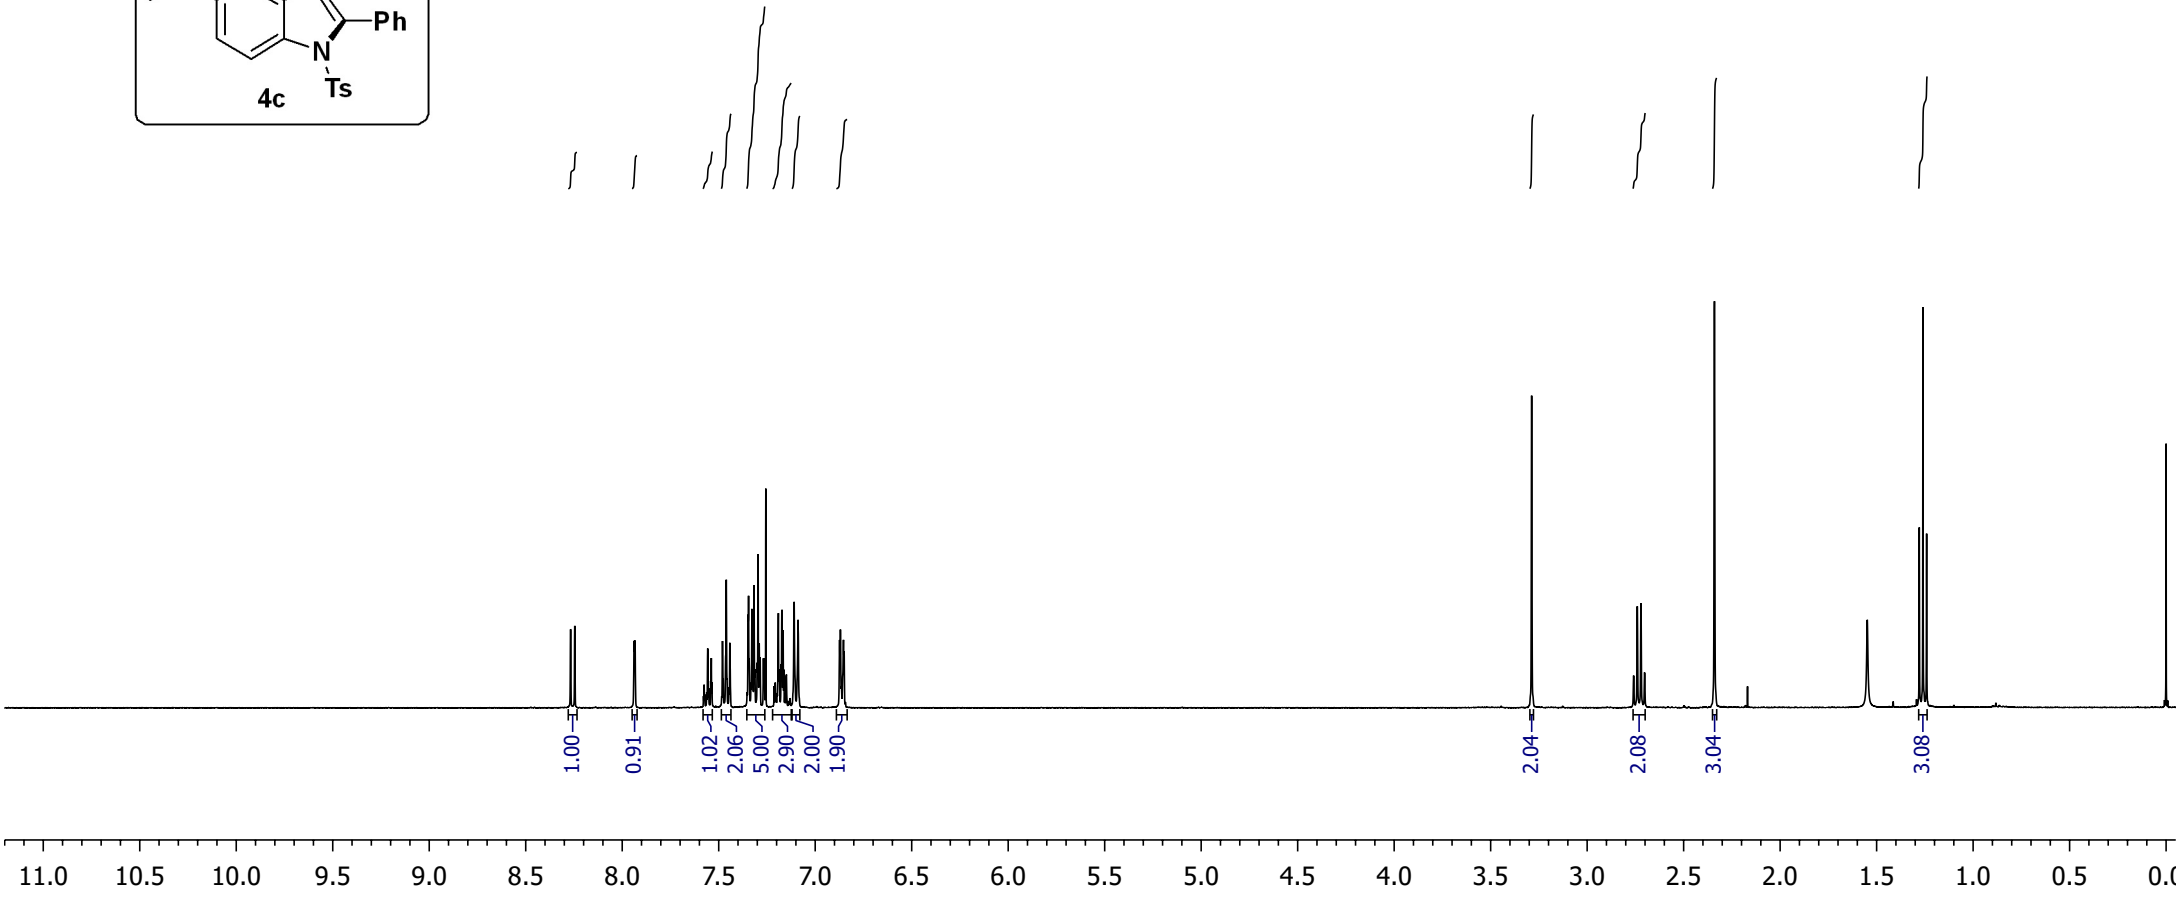

M0470-10  
MC-20-35

145.30  
143.10  
141.41  
131.76  
129.56  
129.43  
128.22  
127.85  
126.96  
126.62  
126.26  
124.51

77.31  
76.99  
76.67

48.41

28.84

21.59

15.98

S51

Solvent  $\text{CDCl}_3$   
Spectrometer Frequency 100.69  
Nucleus  $^{13}\text{C}$

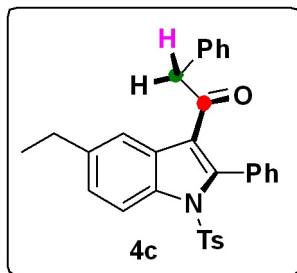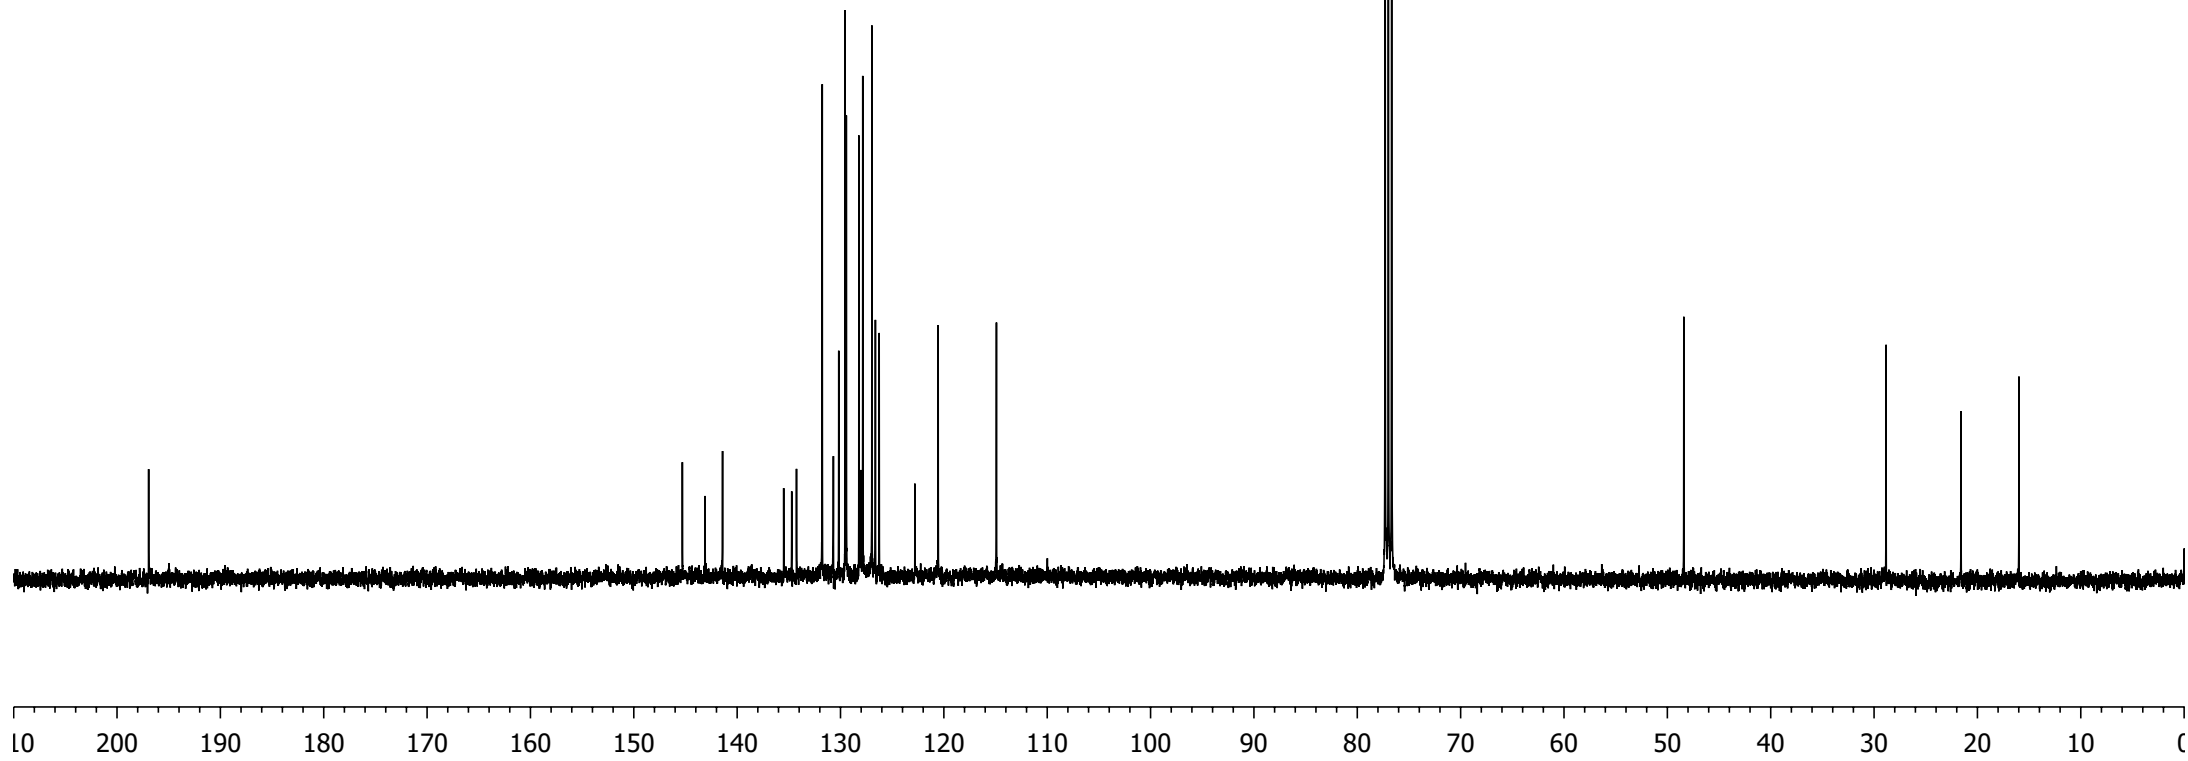

8.30 8.30 8.28 8.28 8.16 8.16 8.15 8.15 7.58 7.56 7.49 7.48 7.47 7.45 7.40 7.39 7.38 7.37 7.33 7.33 7.33 7.31 7.31 7.28 7.26 7.26 7.19 7.18 7.18 7.17 7.17 7.17 7.17 7.13 7.13 7.11 7.11 6.85 6.85 6.83 6.83 6.83 6.83 2.36

Solvent  $\text{CDCl}_3$   
Spectrometer Frequency 400.39  
Nucleus  $^1\text{H}$

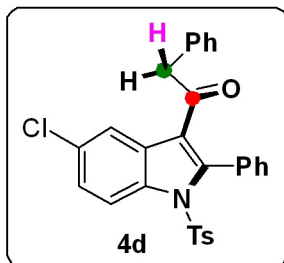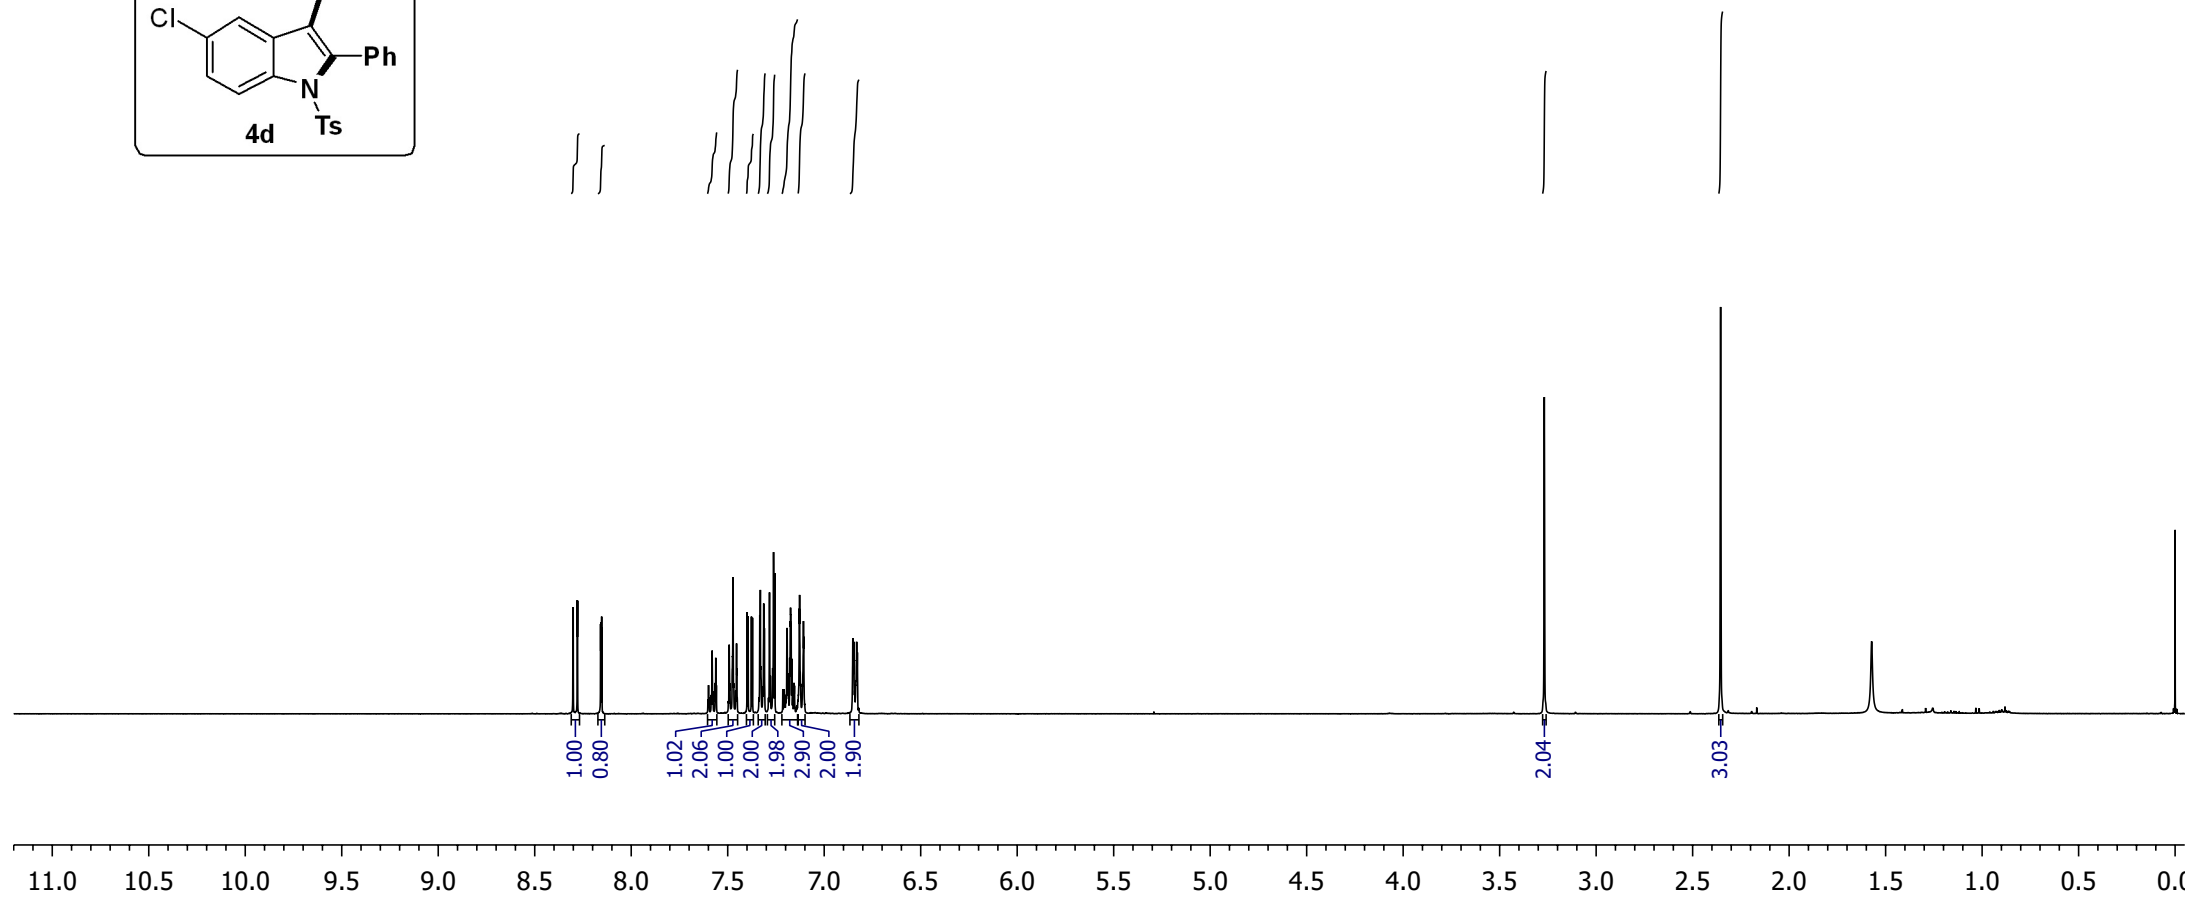

M0461-14  
MC-20-22

—196.32

—145.74  
—144.25  
—131.71  
—130.48  
—129.70  
—129.35  
—128.29  
—127.96  
—126.96  
—126.75  
—126.16  
—121.75  
—116.19

—77.32  
—77.00  
—76.68

—48.24

—21.63

S53

Solvent  $\text{CDCl}_3$   
Spectrometer Frequency 100.66  
Nucleus  $^{13}\text{C}$

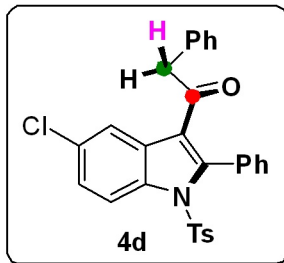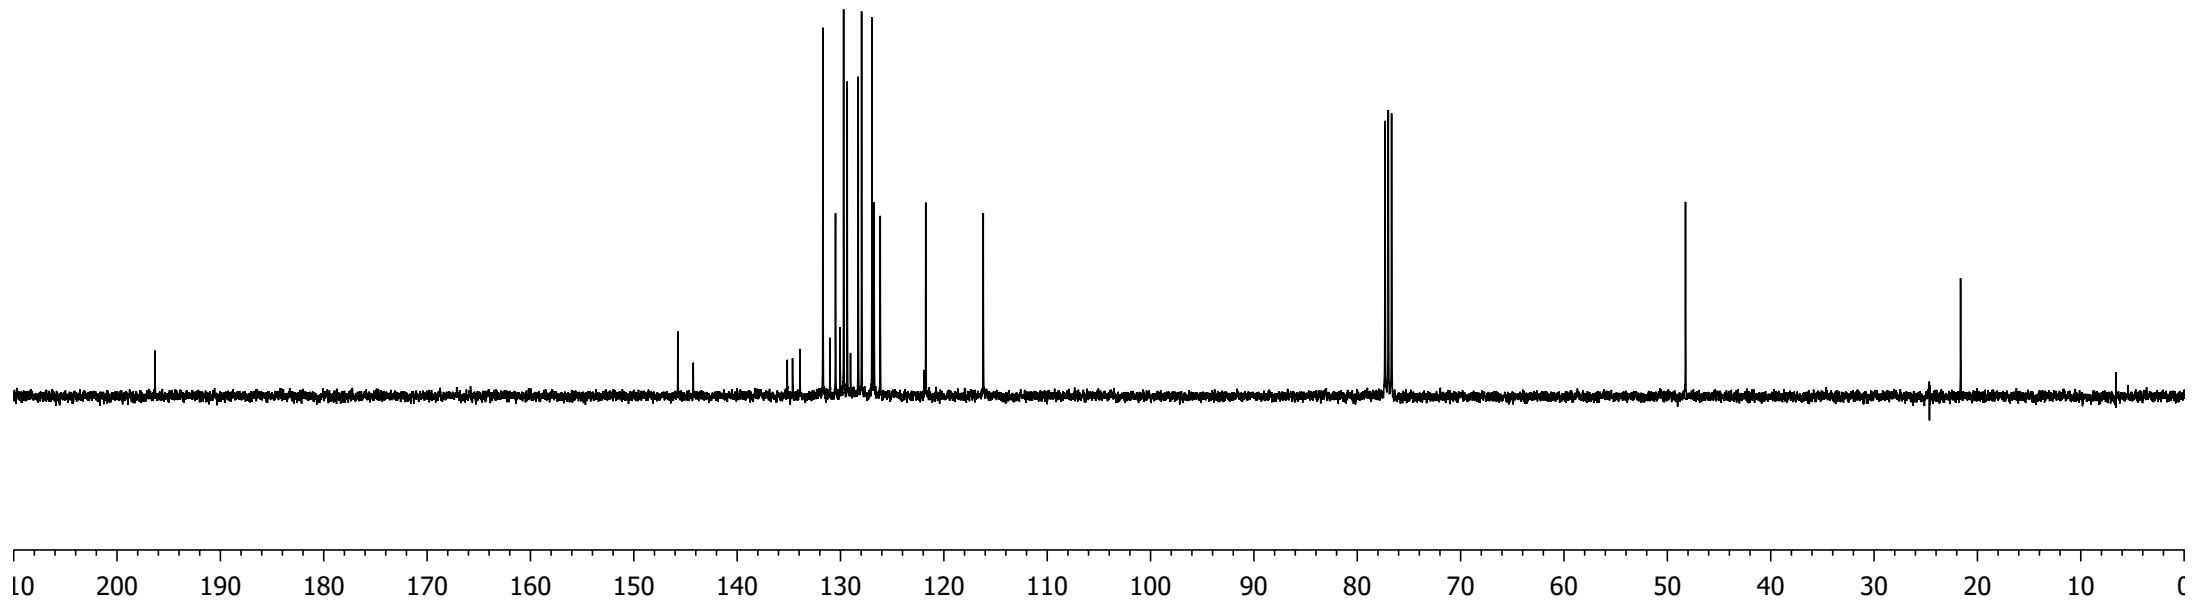

Solvent  $\text{CDCl}_3$   
Spectrometer Frequency 400.39  
Nucleus  $^1\text{H}$

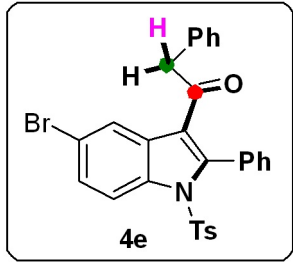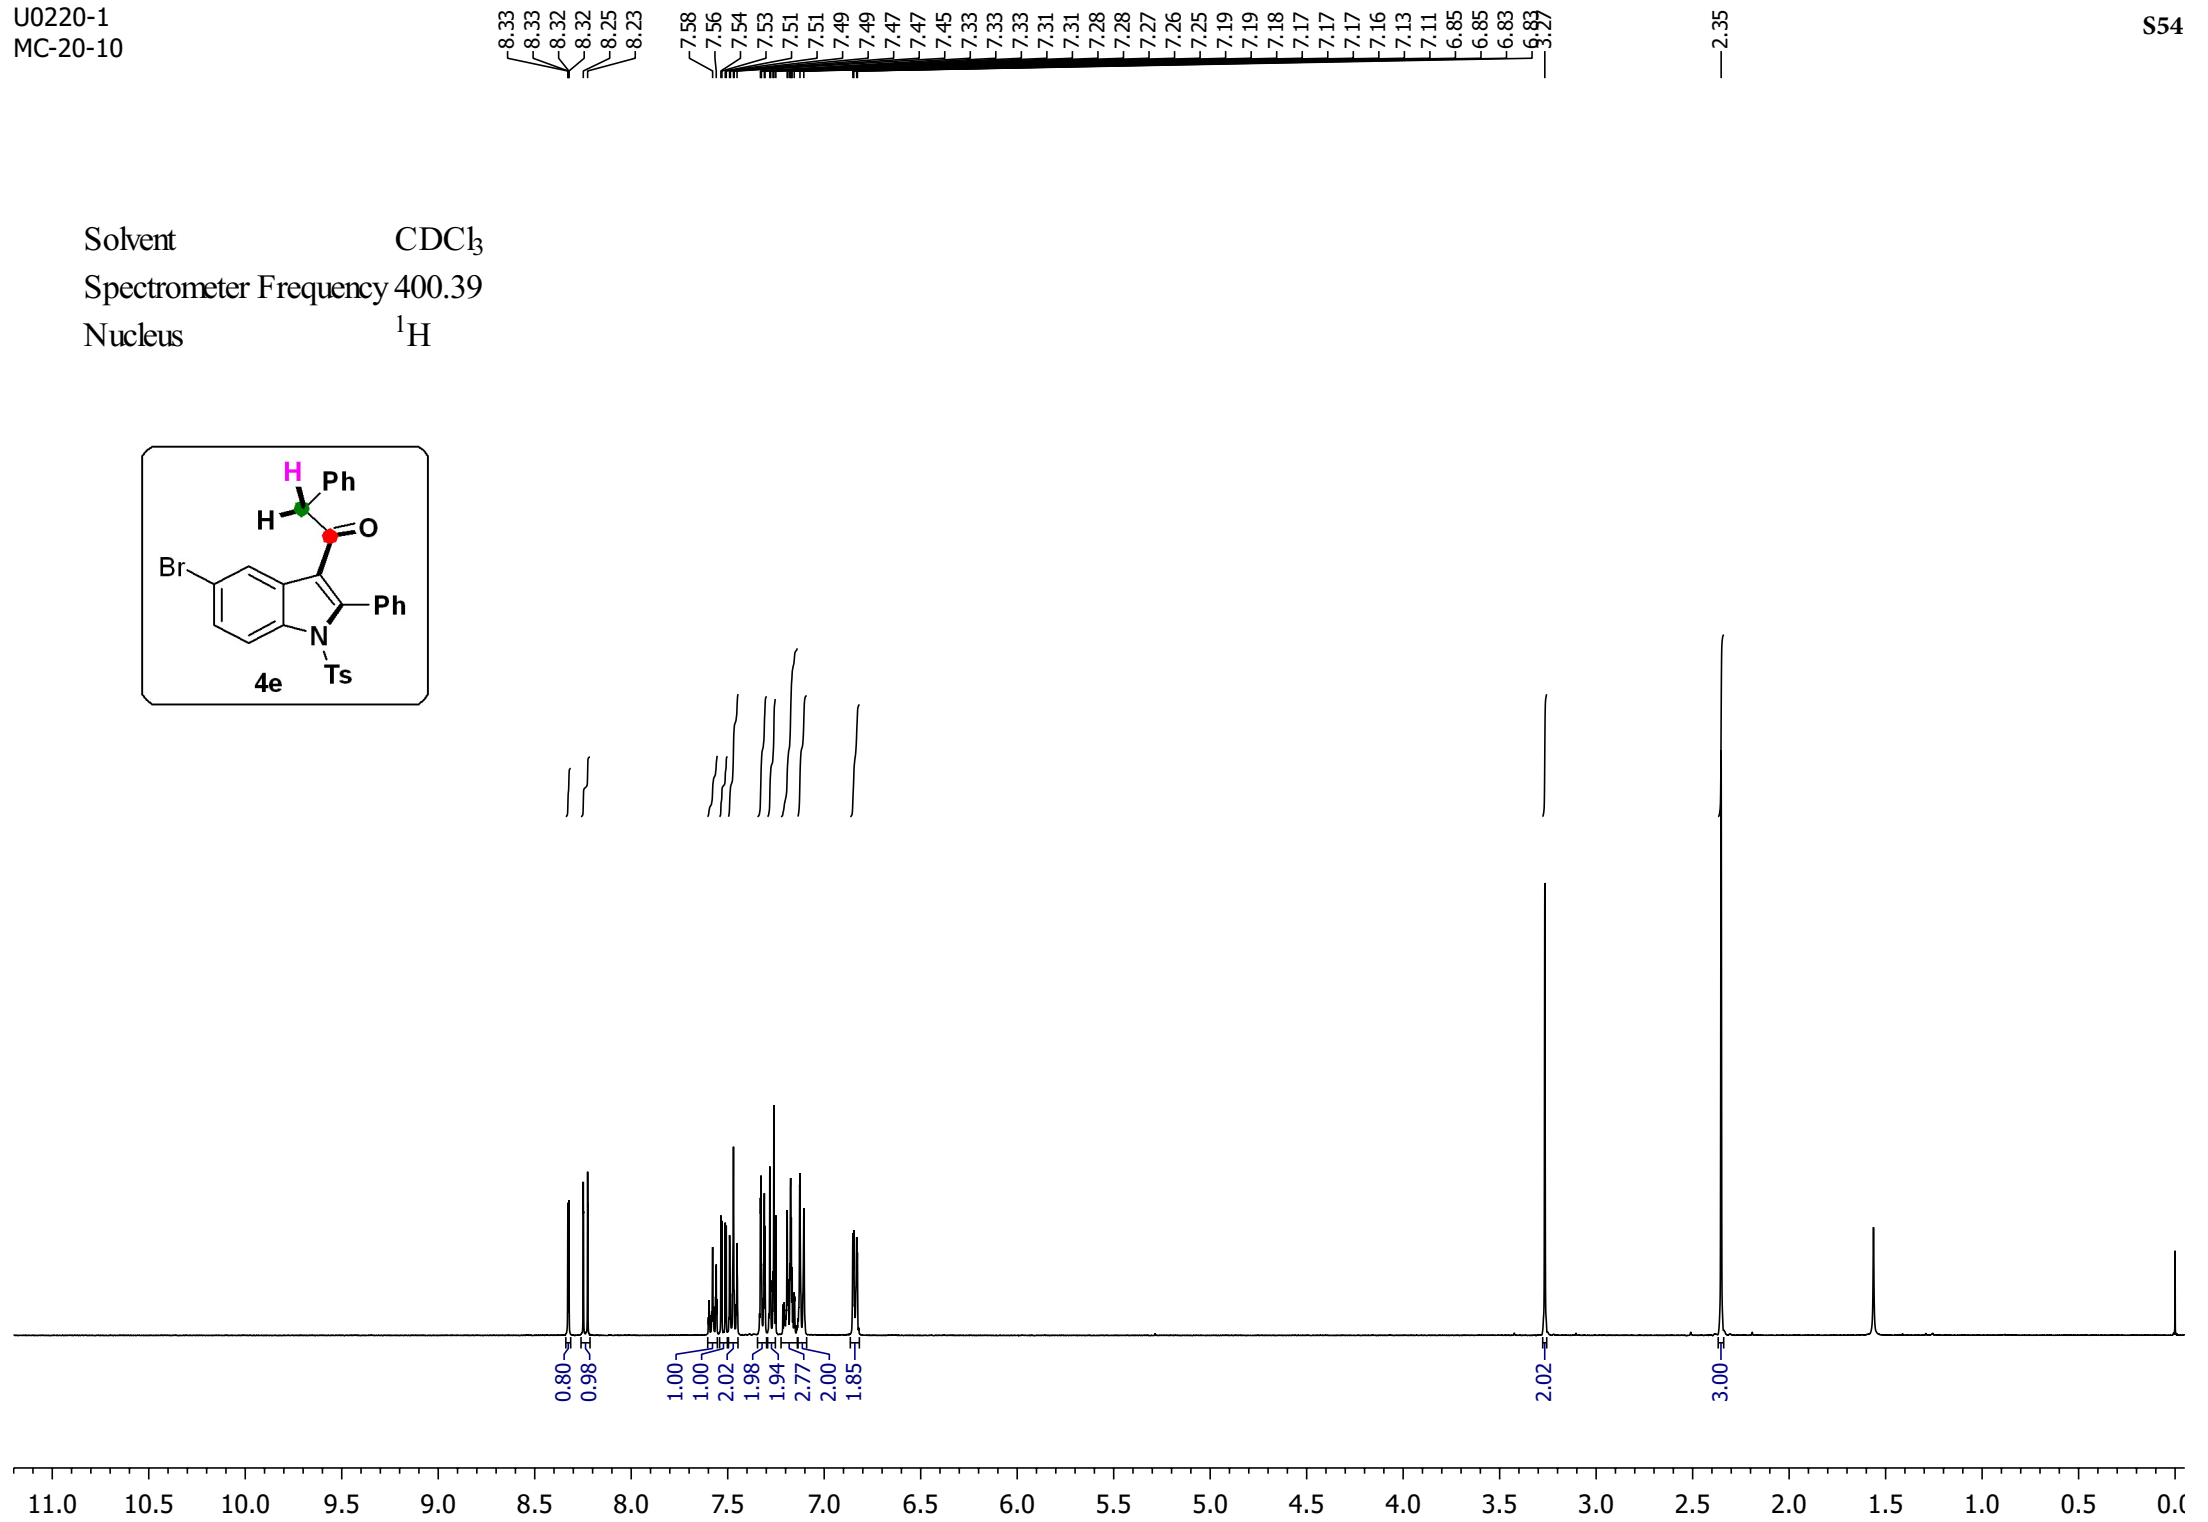

Solvent  $\text{CDCl}_3$   
Spectrometer Frequency 100.69  
Nucleus  $^{13}\text{C}$

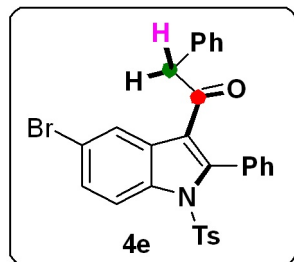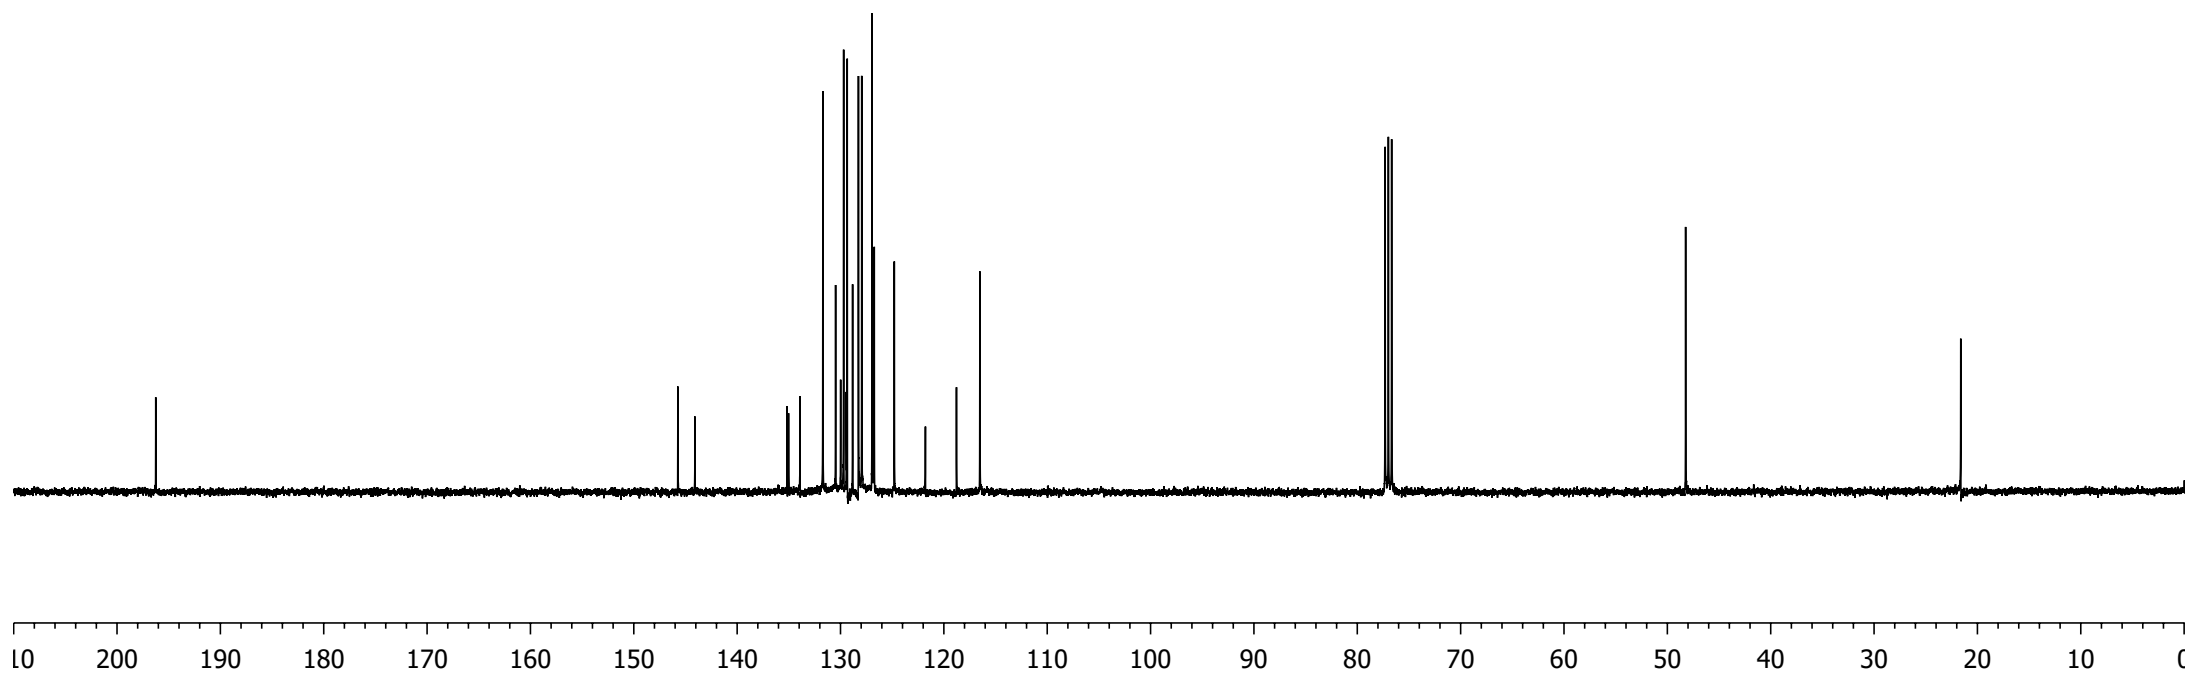

Solvent  $\text{CDCl}_3$   
Spectrometer Frequency 400.39  
Nucleus  $^1\text{H}$

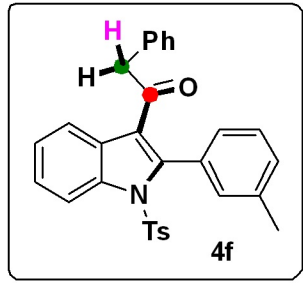

8.40  
8.37  
8.27  
8.25  
7.49  
7.49  
7.47  
7.47  
7.46  
7.46  
7.45  
7.45  
7.45  
7.44  
7.43  
7.42  
7.39  
7.37  
7.36  
7.35  
7.34  
7.32  
7.26  
7.25  
7.24  
7.22  
7.21  
7.20  
7.19  
7.17  
7.17  
7.16  
7.15  
7.13  
7.00  
6.98  
6.85  
6.83  
3.28  
3.27  
3.23

2.35  
2.11

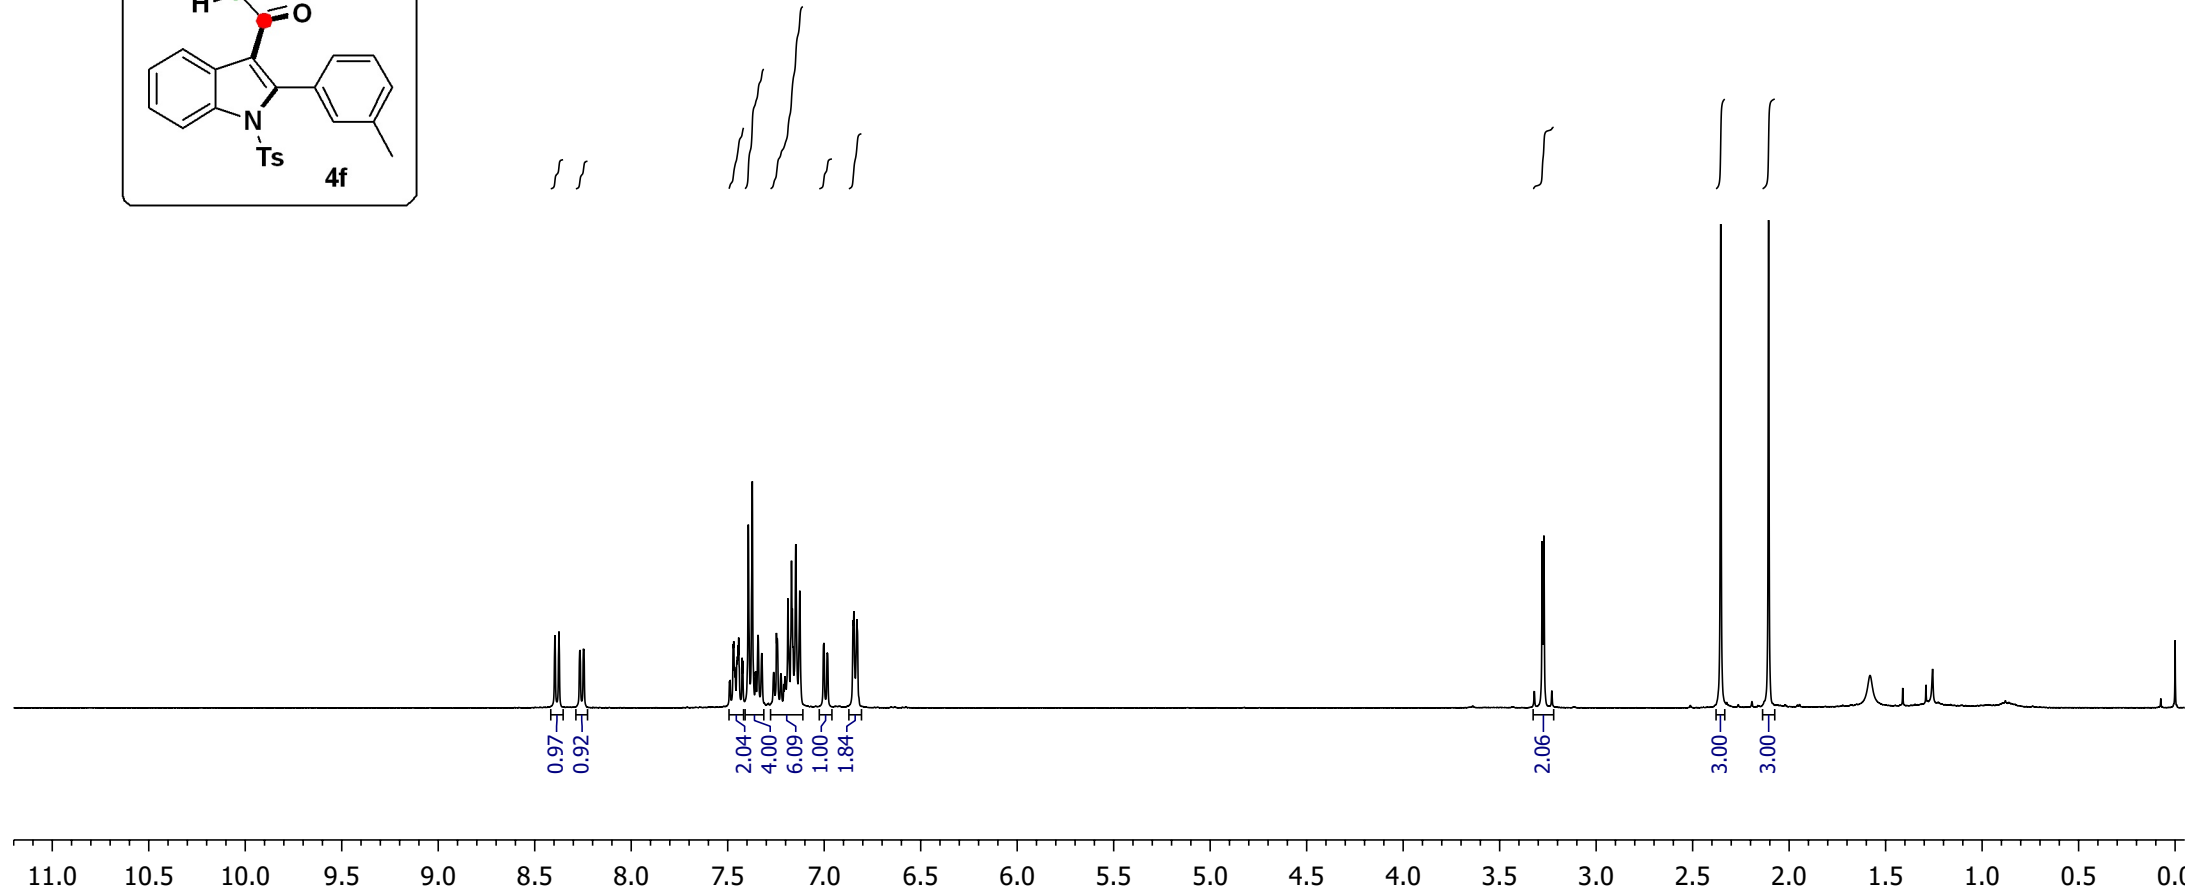



M0461-2  
MC-20-16

— 196.19

145.50  
142.94  
139.90  
136.22  
135.63  
134.16  
131.29  
130.53  
130.43  
130.20  
129.60  
129.42  
128.19  
127.86  
127.15  
126.60  
125.78  
125.21  
124.93  
122.34  
121.88  
— 114.80

77.31  
76.99  
76.67

— 47.86

21.59  
20.29

S57

Solvent  $\text{CDCl}_3$   
Spectrometer Frequency 100.69  
Nucleus  $^{13}\text{C}$

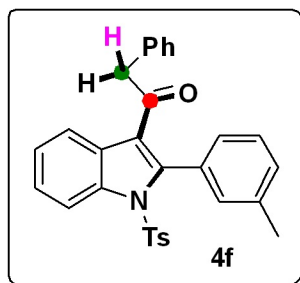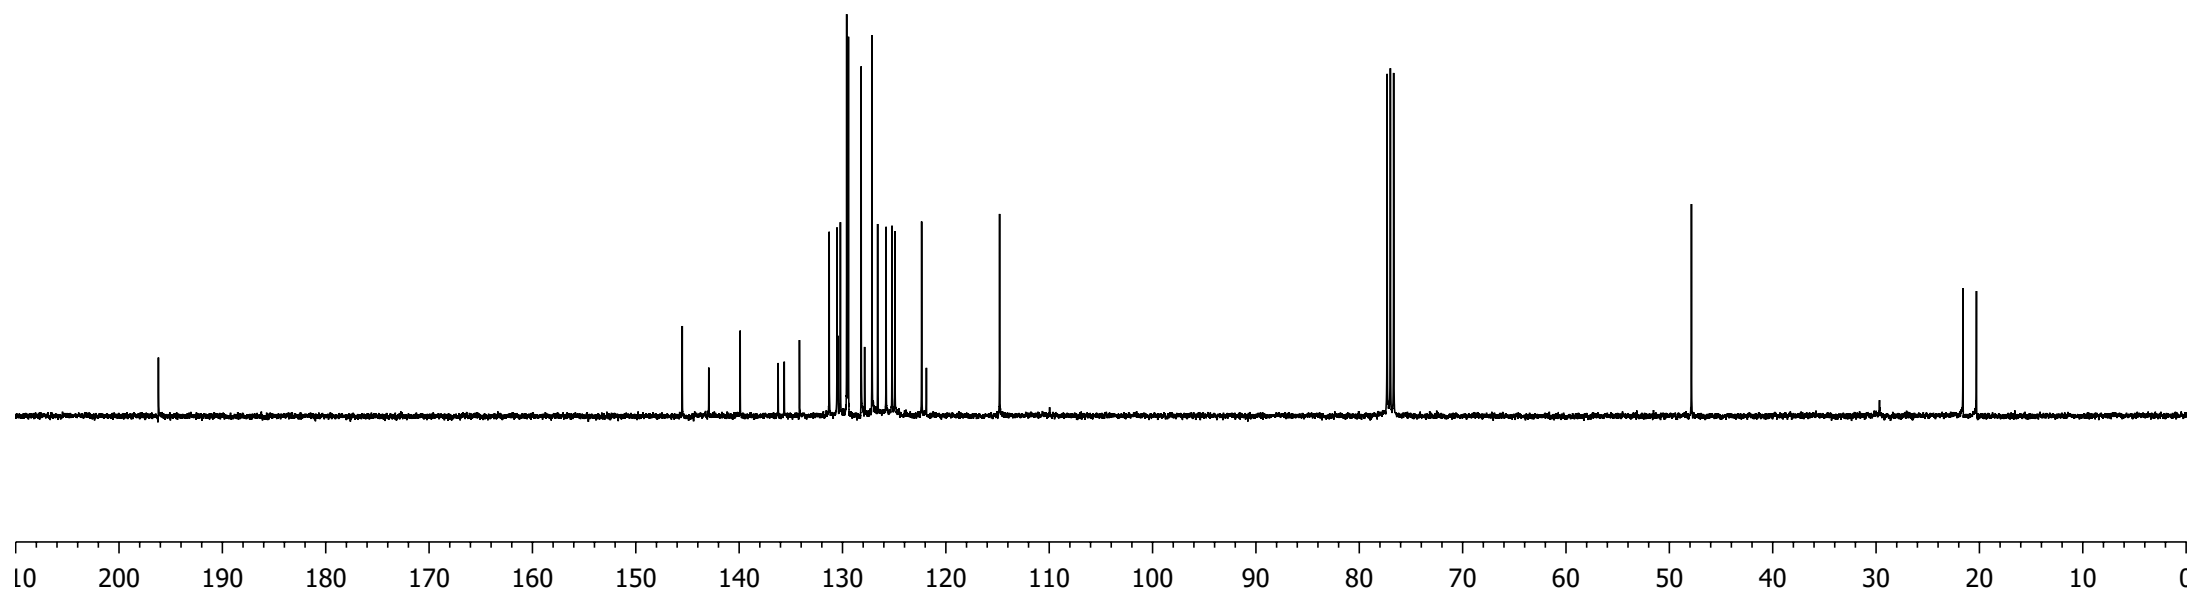

Solvent  $\text{CDCl}_3$   
Spectrometer Frequency 400.39  
Nucleus  $^1\text{H}$

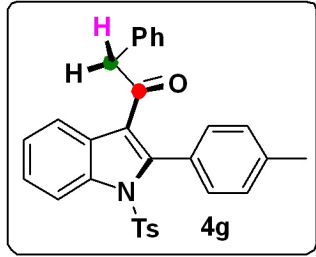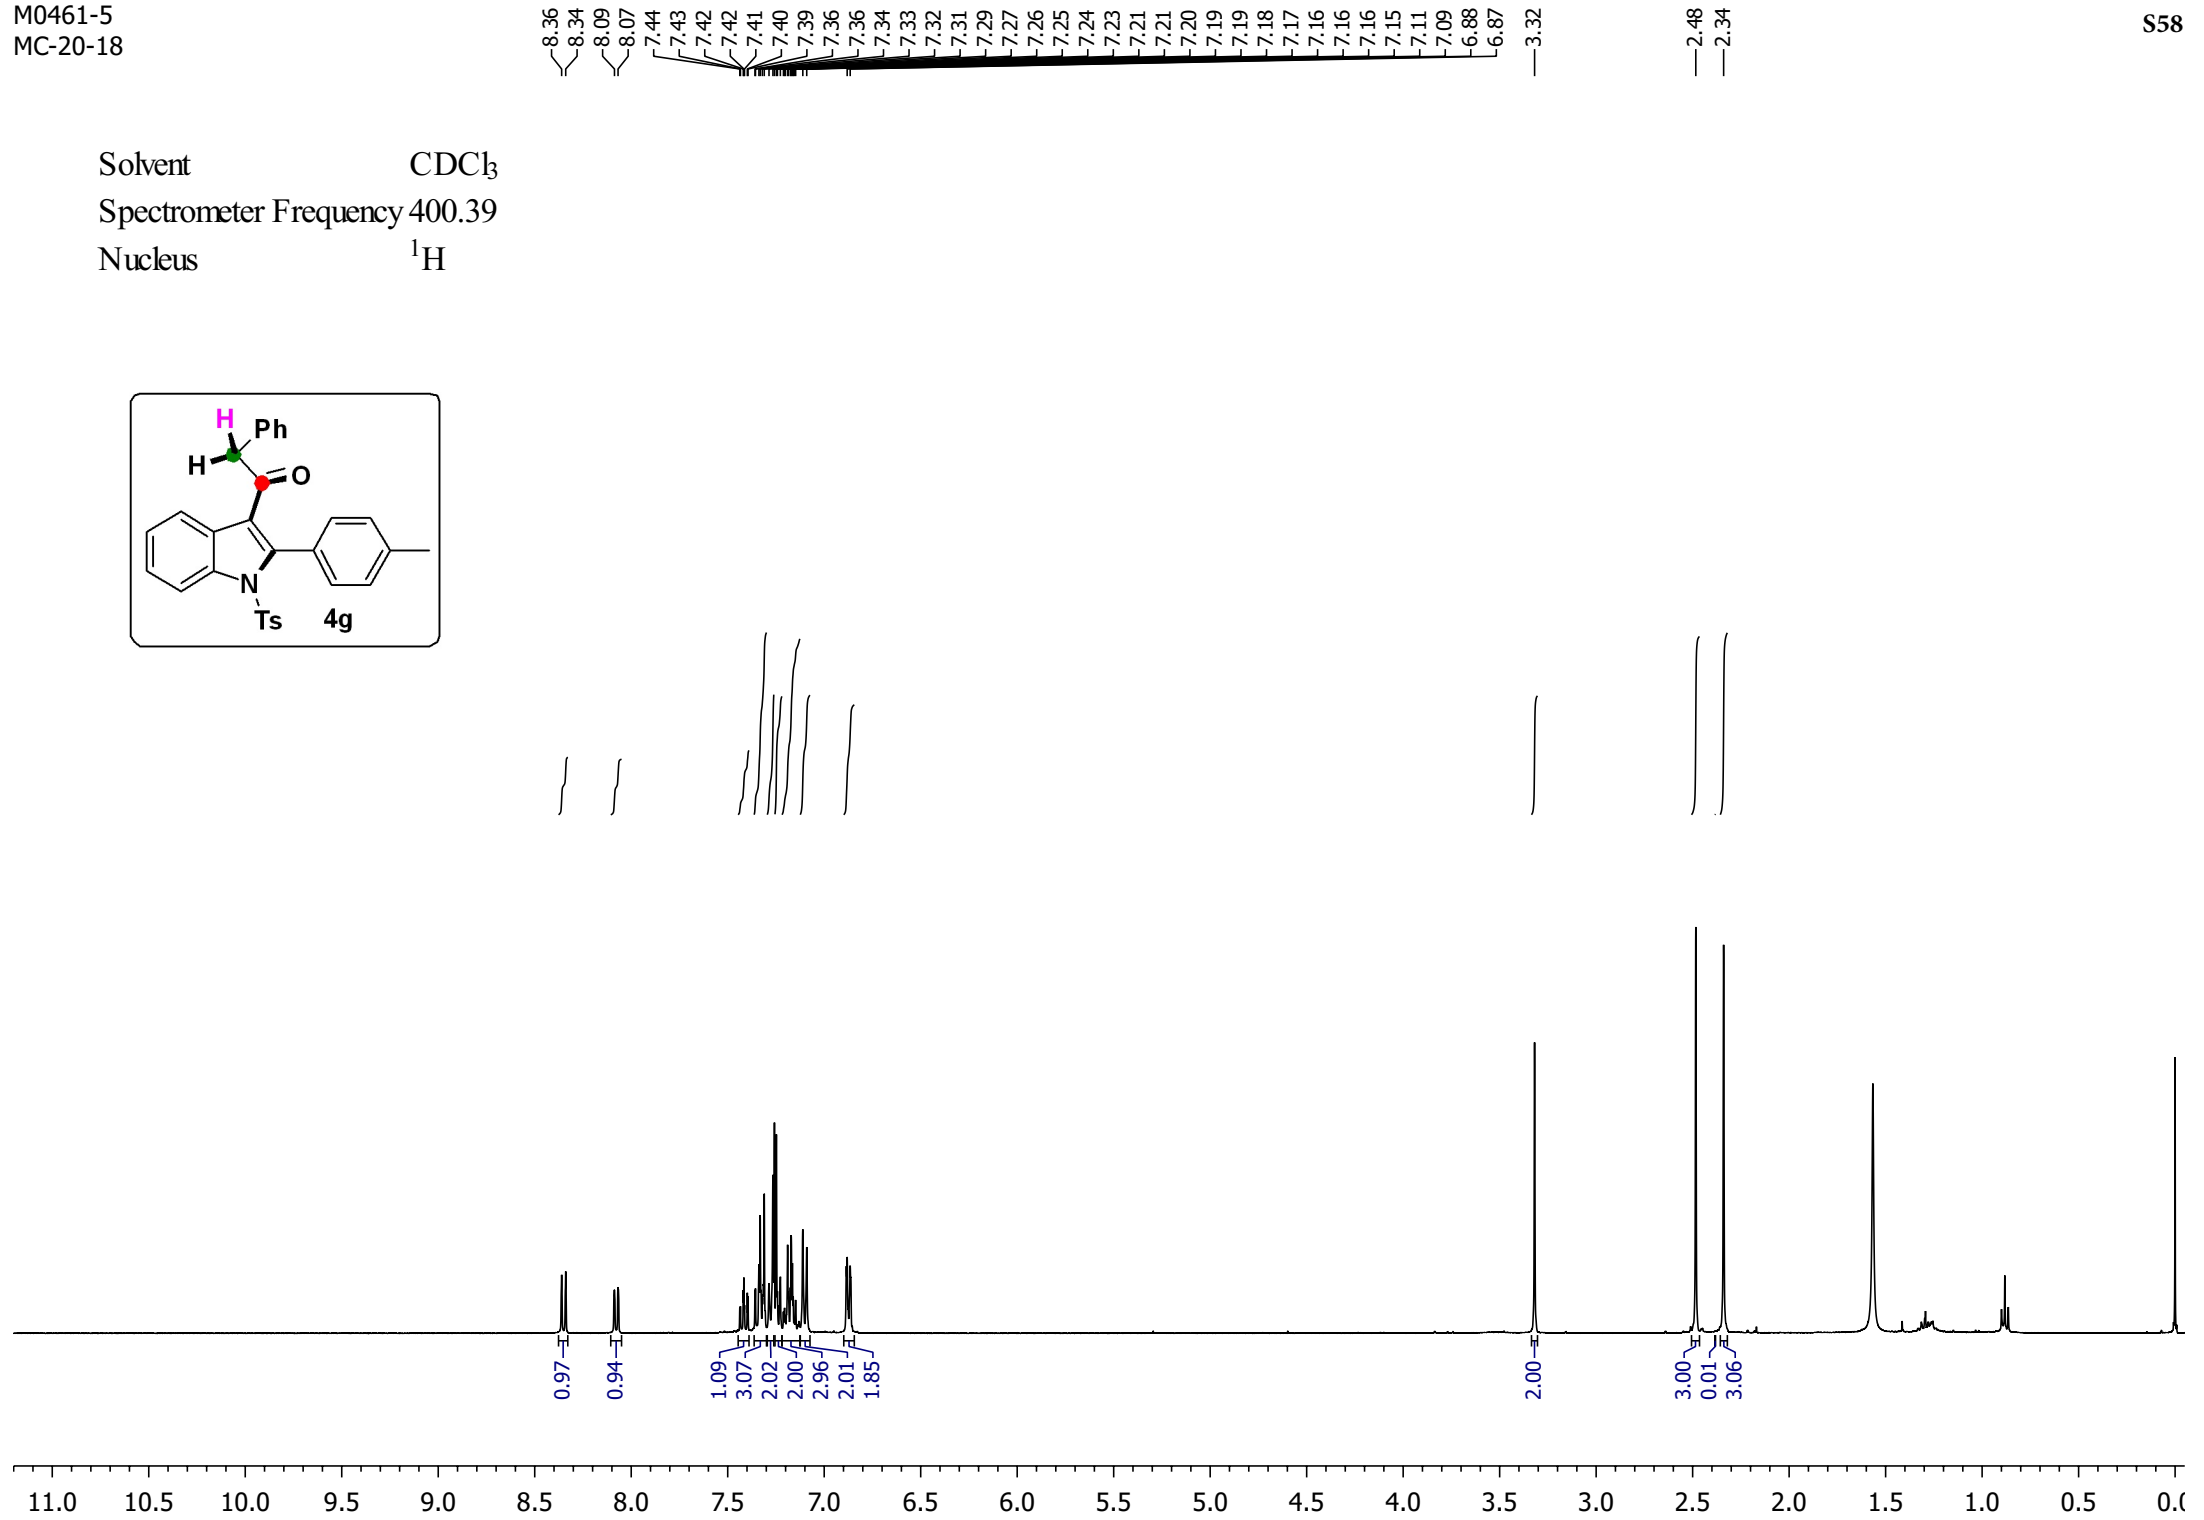

M0461-6  
MC-20-18

— 196.95

145.34  
143.42  
140.45  
136.32  
135.43  
134.33  
131.61  
129.54  
129.42  
128.61  
128.23  
127.98  
127.52  
126.96  
126.63  
125.77  
125.03  
122.81  
121.87  
— 115.18

77.31  
76.99  
76.68

— 48.39

21.62  
21.59

S59

Solvent  $\text{CDCl}_3$   
Spectrometer Frequency 100.69  
Nucleus  $^{13}\text{C}$

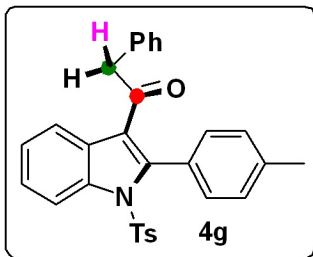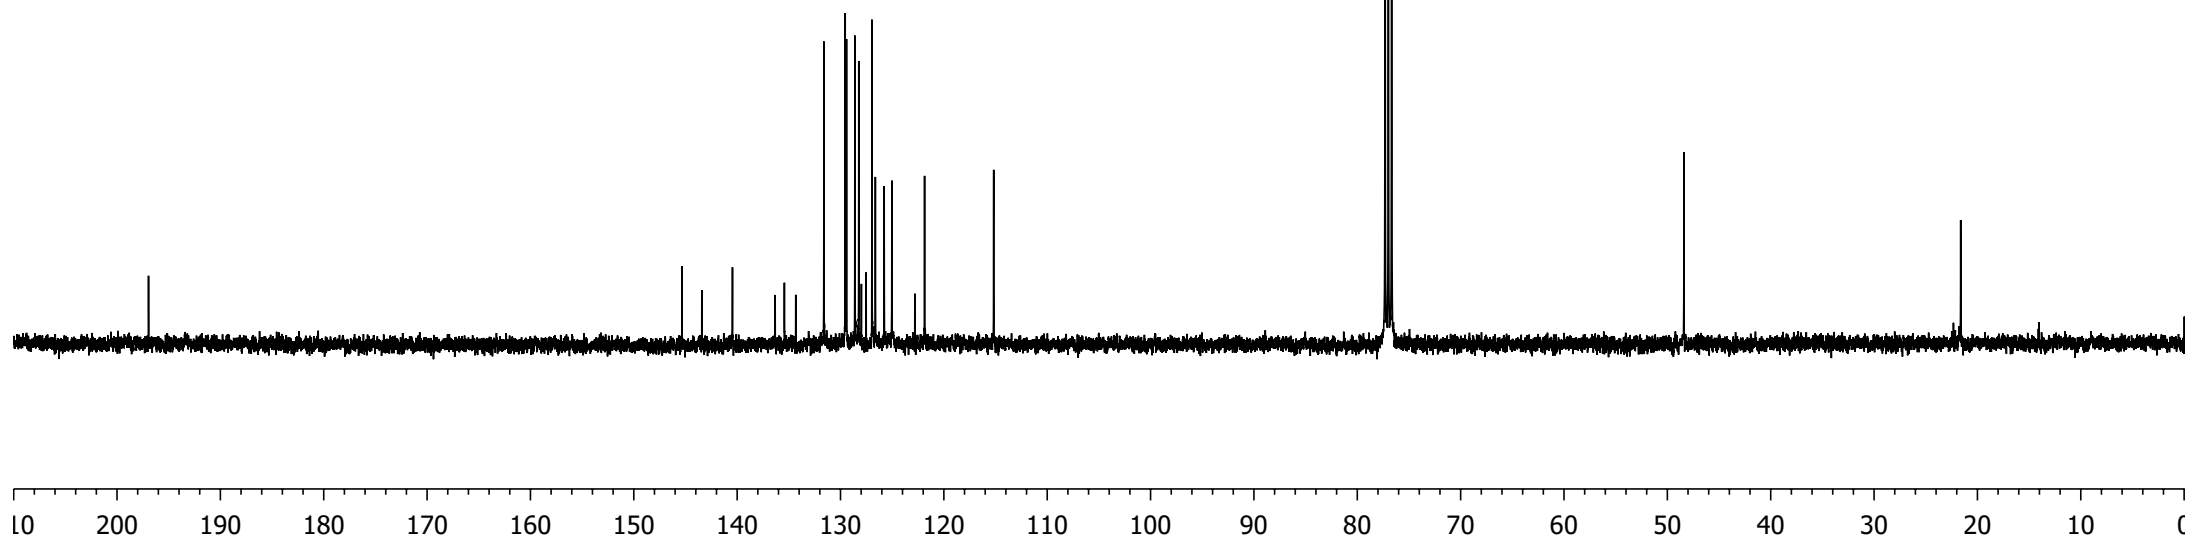

Solvent  $\text{CDCl}_3$   
Spectrometer Frequency 400.39  
Nucleus  $^1\text{H}$

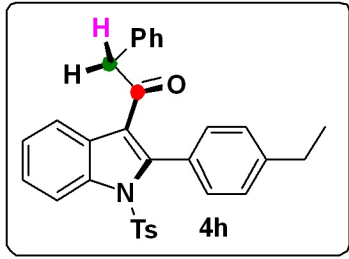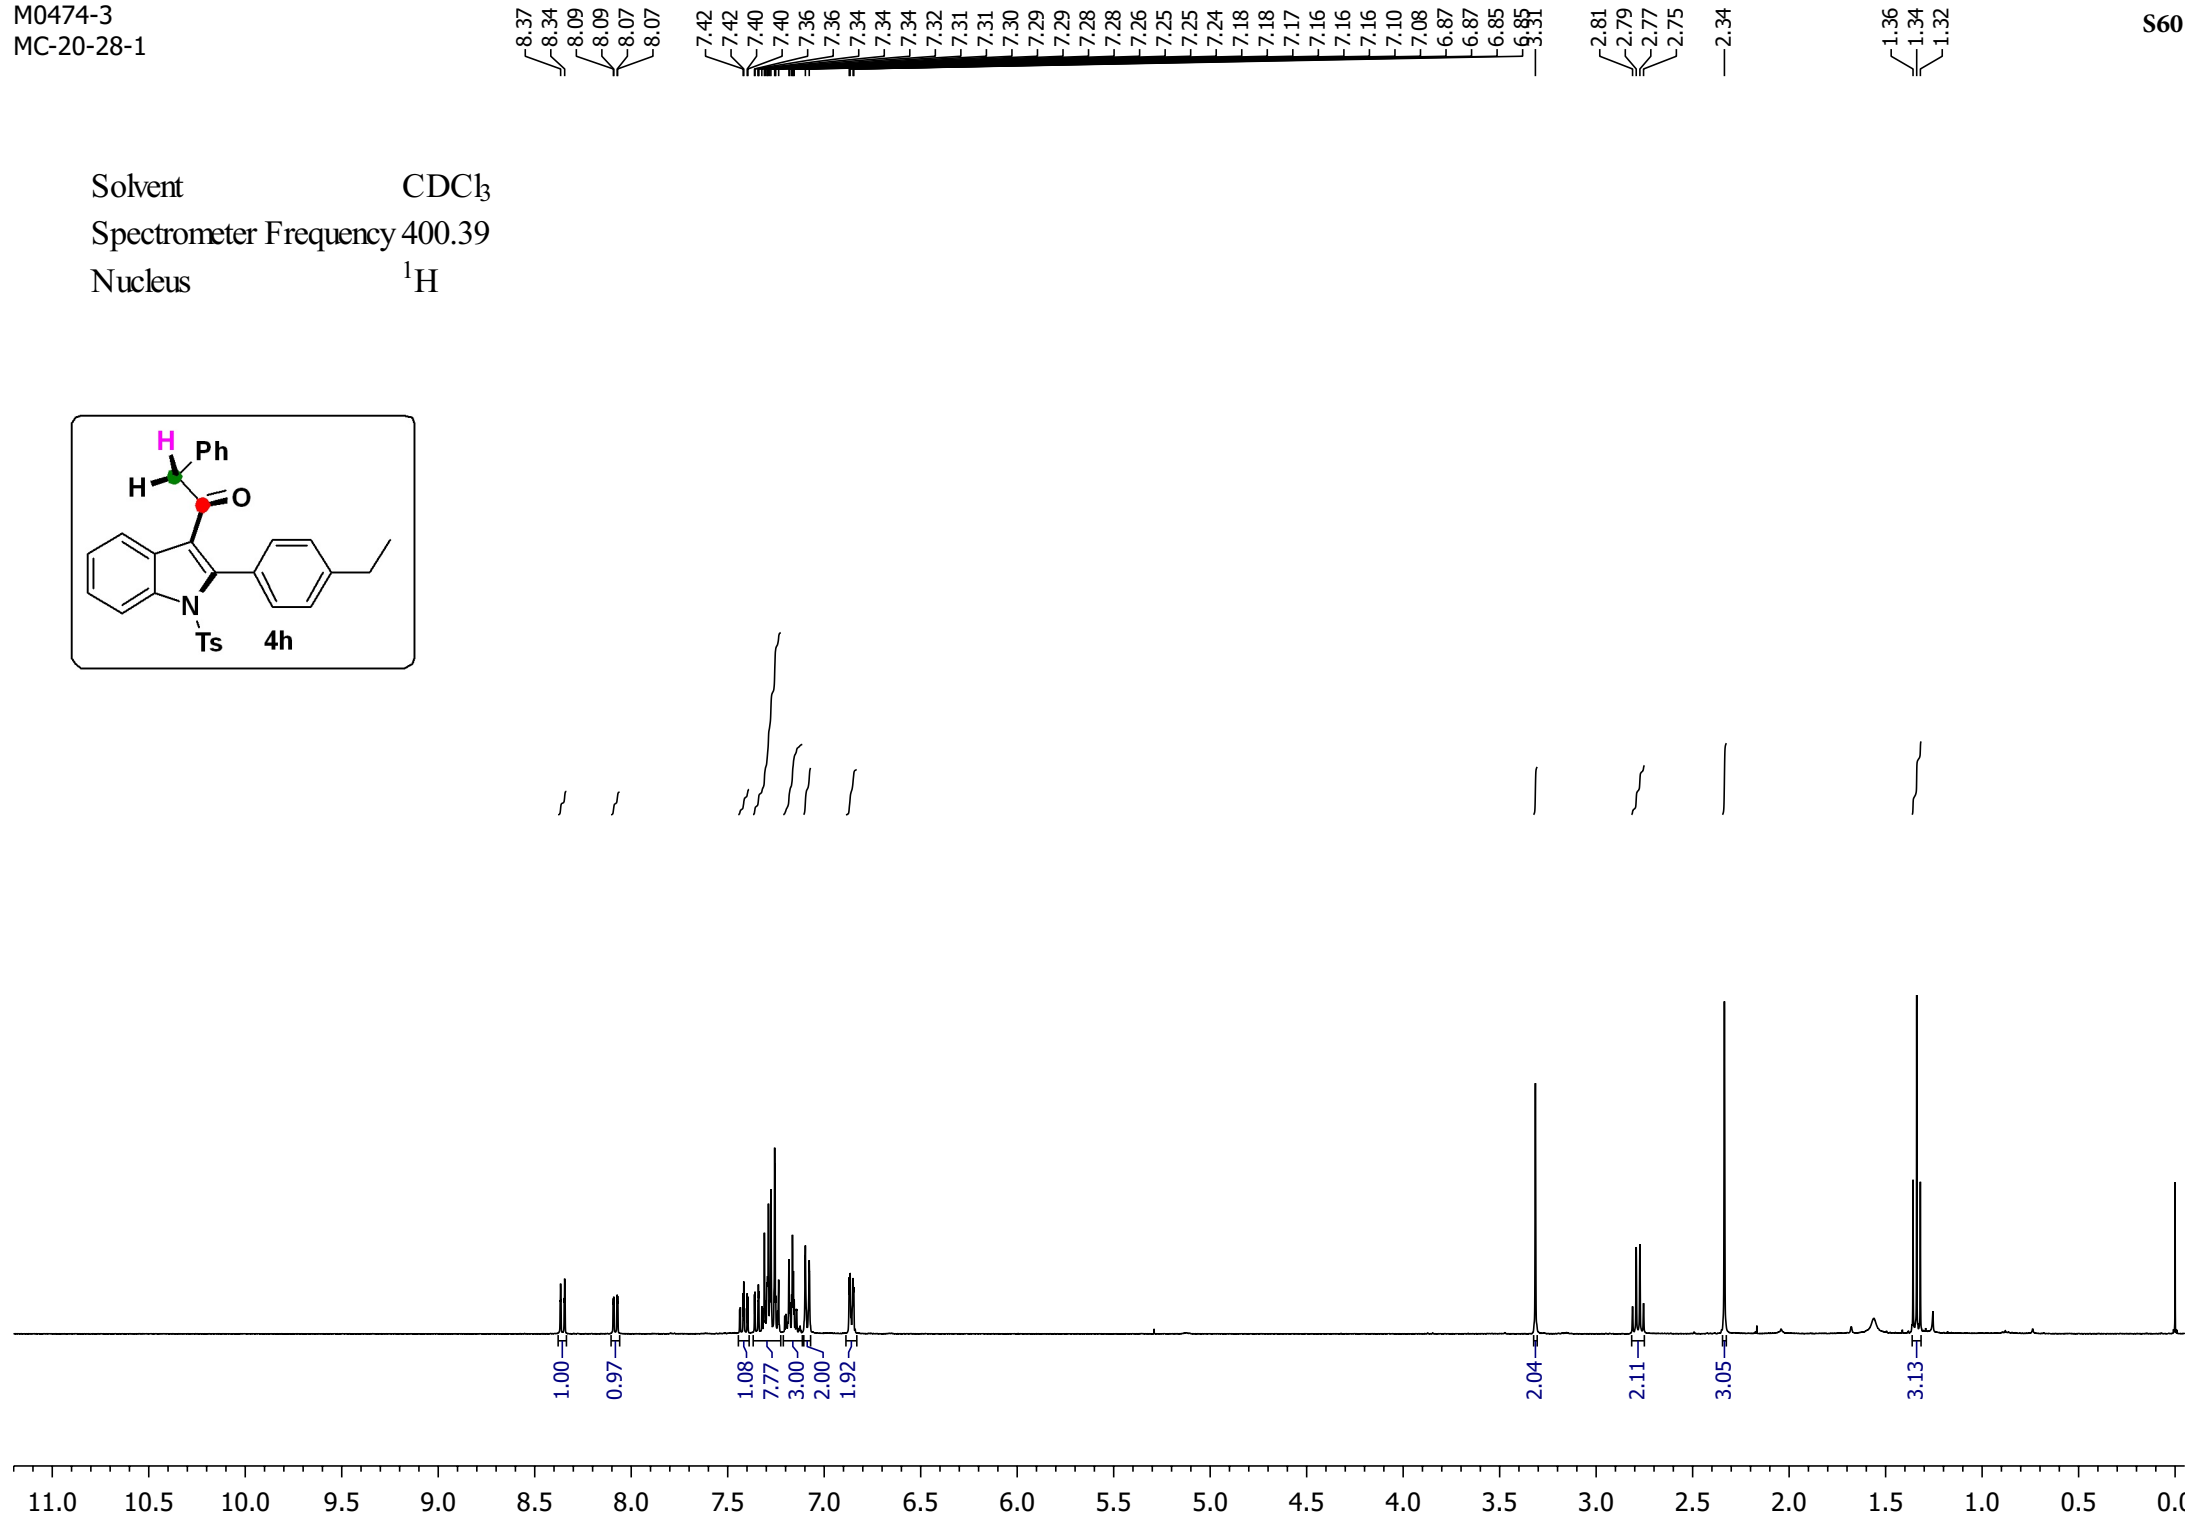

M0474-4  
MC-20-28-

156.98

146.66  
145.28  
143.41  
131.74  
129.52  
129.39  
128.20  
127.34  
126.98  
126.60  
125.76  
124.99  
121.88  
121.83  
109.97

77.31  
76.99  
76.67

48.34

28.79

21.58

15.33

S61

Solvent  $\text{CDCl}_3$   
Spectrometer Frequency 100.69  
Nucleus  $^{13}\text{C}$

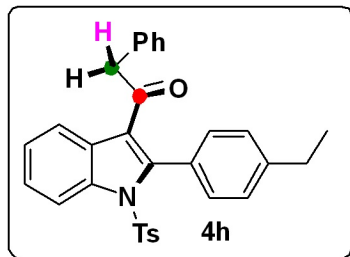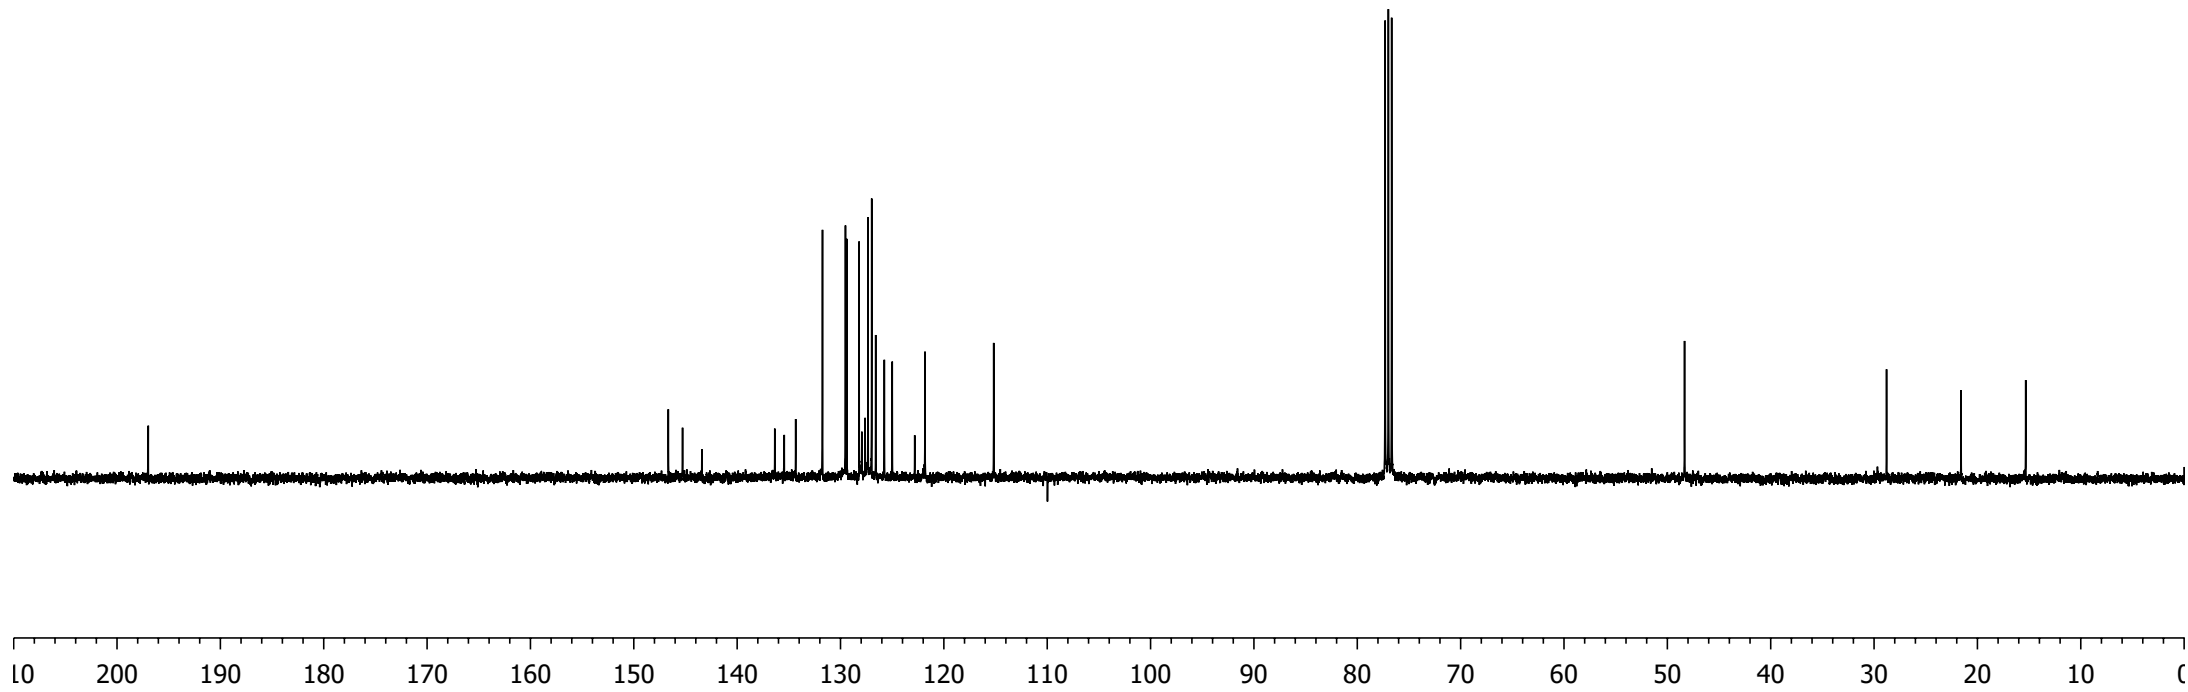

Solvent  $\text{CDCl}_3$   
Spectrometer Frequency 400.39  
Nucleus  $^1\text{H}$

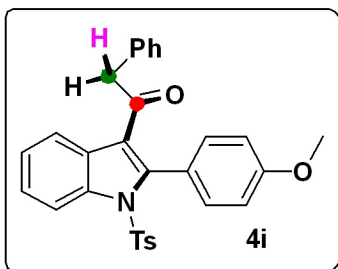

8.37  
8.35  
8.09  
8.09  
8.08  
8.08  
8.07  
8.07  
8.06  
8.06  
7.42  
7.42  
7.40  
7.39  
7.36  
7.36  
7.34  
7.34  
7.31  
7.29  
7.28  
7.26  
7.26  
7.25  
7.24  
7.24  
7.19  
7.17  
7.17  
7.17  
7.16  
7.10  
6.99  
6.96  
6.90  
6.89  
6.88  
6.87

3.34

2.33

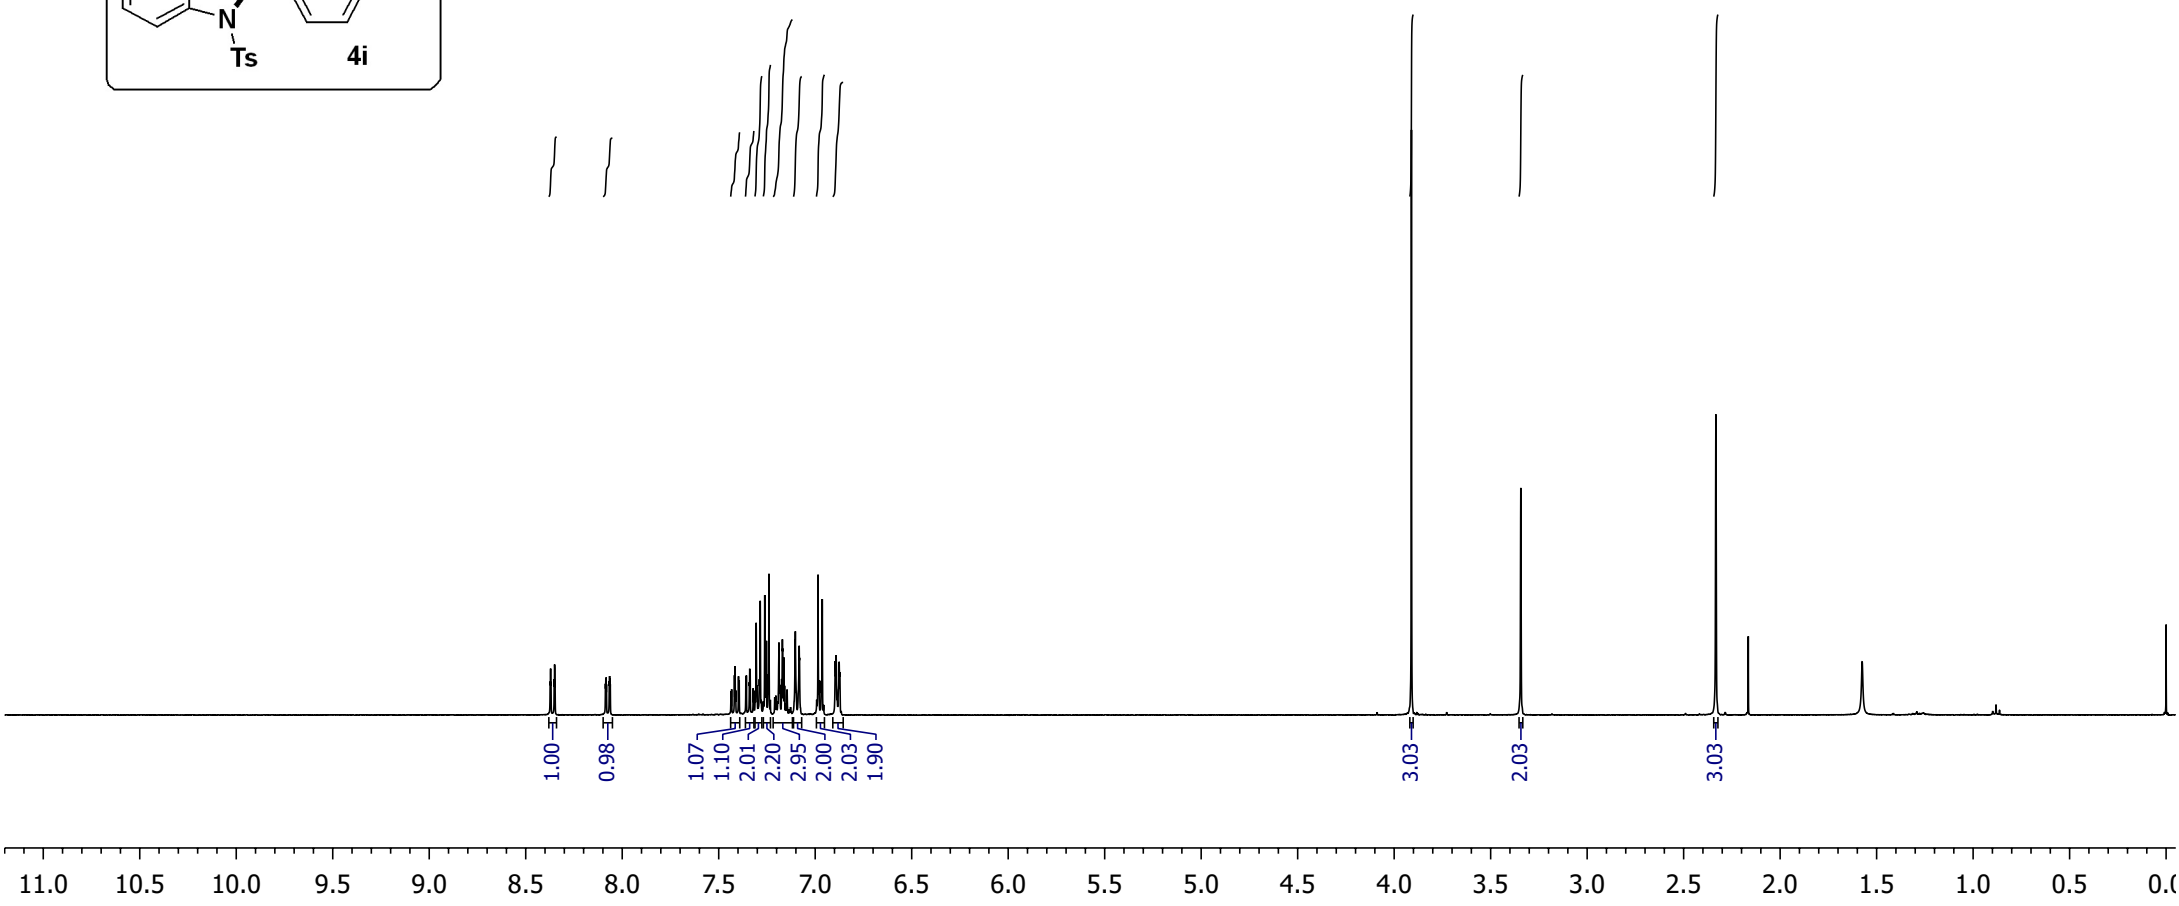

M0466-2  
MC-20-23

—196.99

—161.09

—145.30

—143.25

—133.17

—129.53

—129.38

—128.23

—126.92

—126.62

—125.76

—125.02

—122.29

—121.78

—115.22

—113.31

—77.31

—76.99

—76.67

—55.36

—48.39

—21.57

S63

Solvent  $\text{CDCl}_3$   
Spectrometer Frequency 100.69  
Nucleus  $^{13}\text{C}$

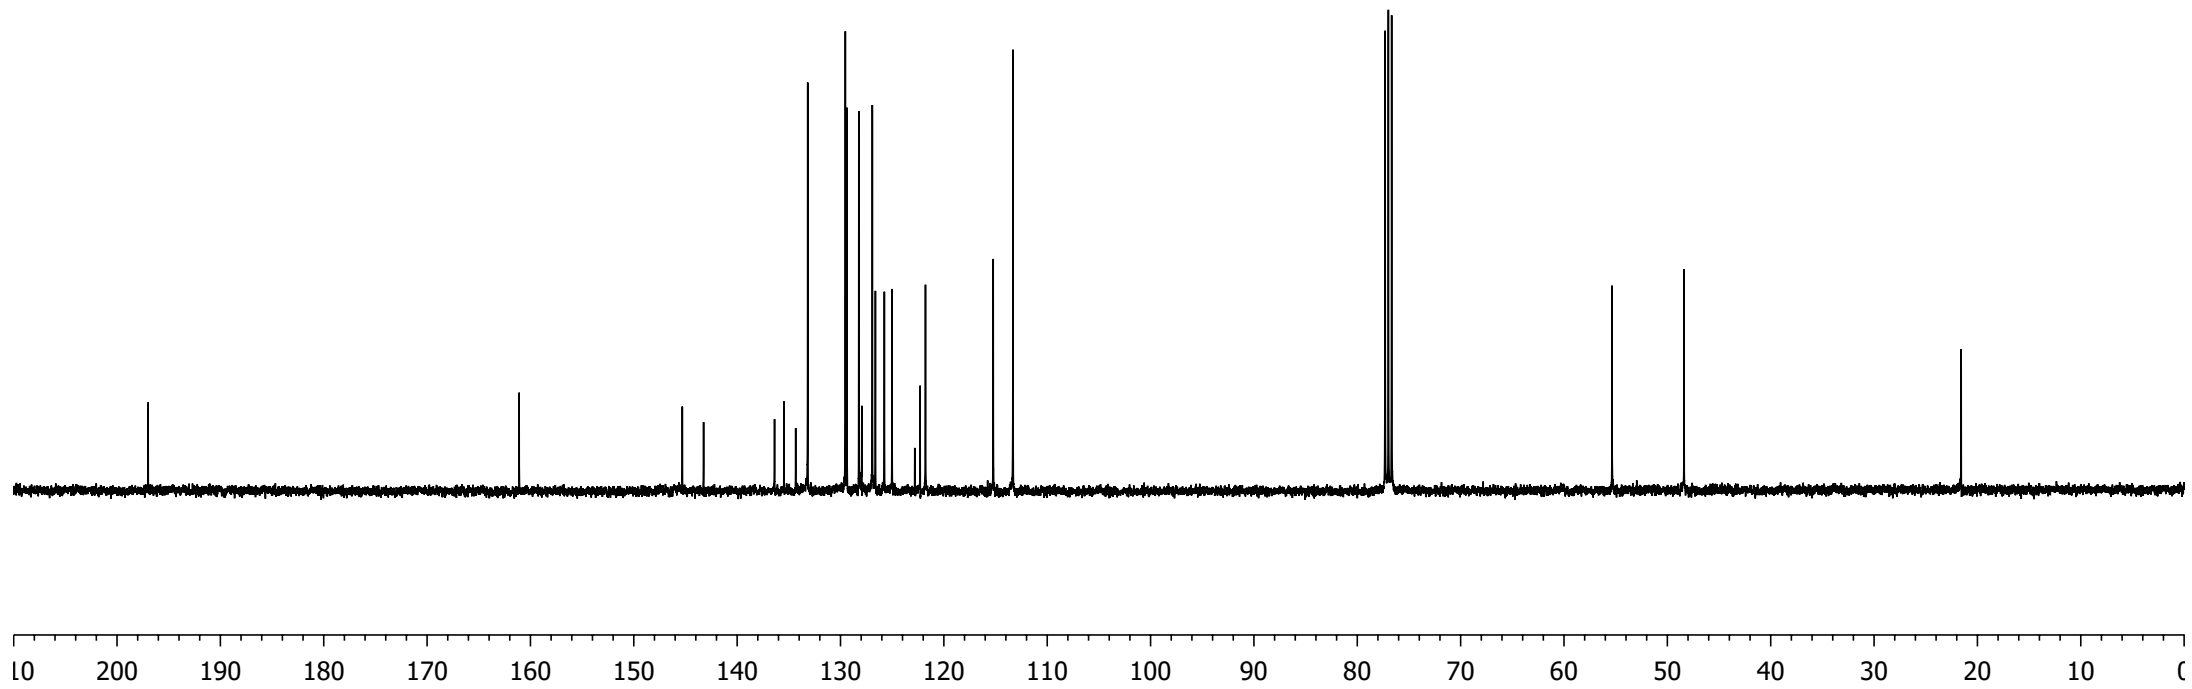

8.28  
8.27  
8.27  
8.25  
7.86  
7.84  
7.65  
7.63  
7.36  
7.34  
7.33  
7.32  
7.30  
7.28  
7.26  
7.26  
7.25  
7.23  
7.21  
7.19  
7.18

4.25

3.25  
3.23  
3.21

2.36  
1.63  
1.62  
1.61  
1.60  
1.59  
1.43  
1.41  
1.39  
1.38  
0.99  
0.90  
0.88

Solvent  $\text{CDCl}_3$   
Spectrometer Frequency 400.39  
Nucleus  $^1\text{H}$

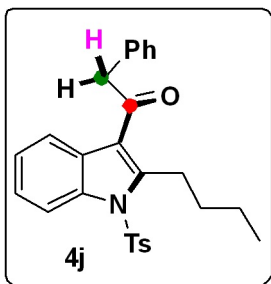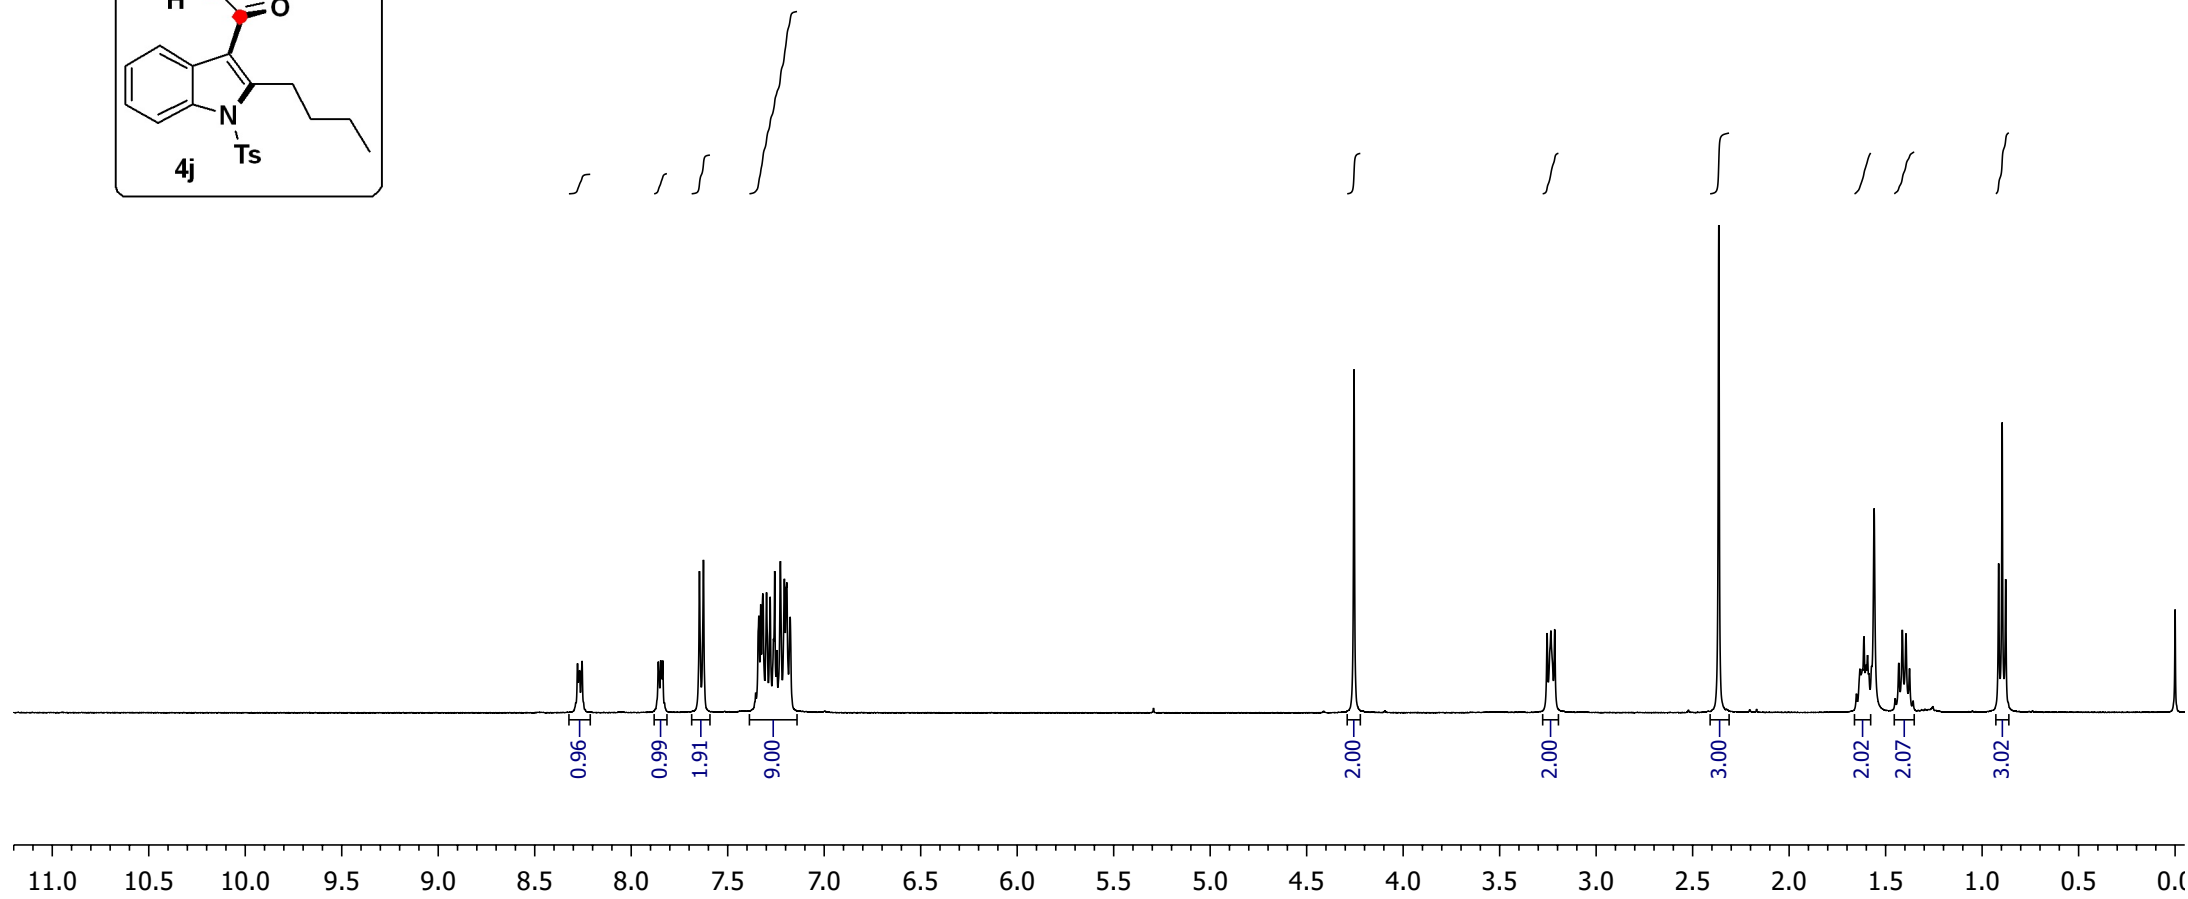



—196.07

—148.24  
—145.31  
136.09  
134.20  
130.01  
129.55  
128.54  
126.96  
126.91  
126.40  
126.63  
124.34  
124.43

77.31  
76.99  
76.67

—50.23

—33.18

27.15  
22.94  
21.59

—13.74

Solvent  $\text{CDCl}_3$   
Spectrometer Frequency 100.69  
Nucleus  $^{13}\text{C}$

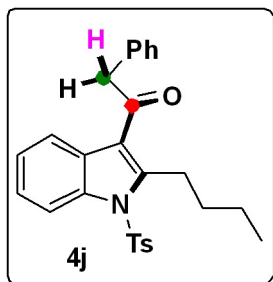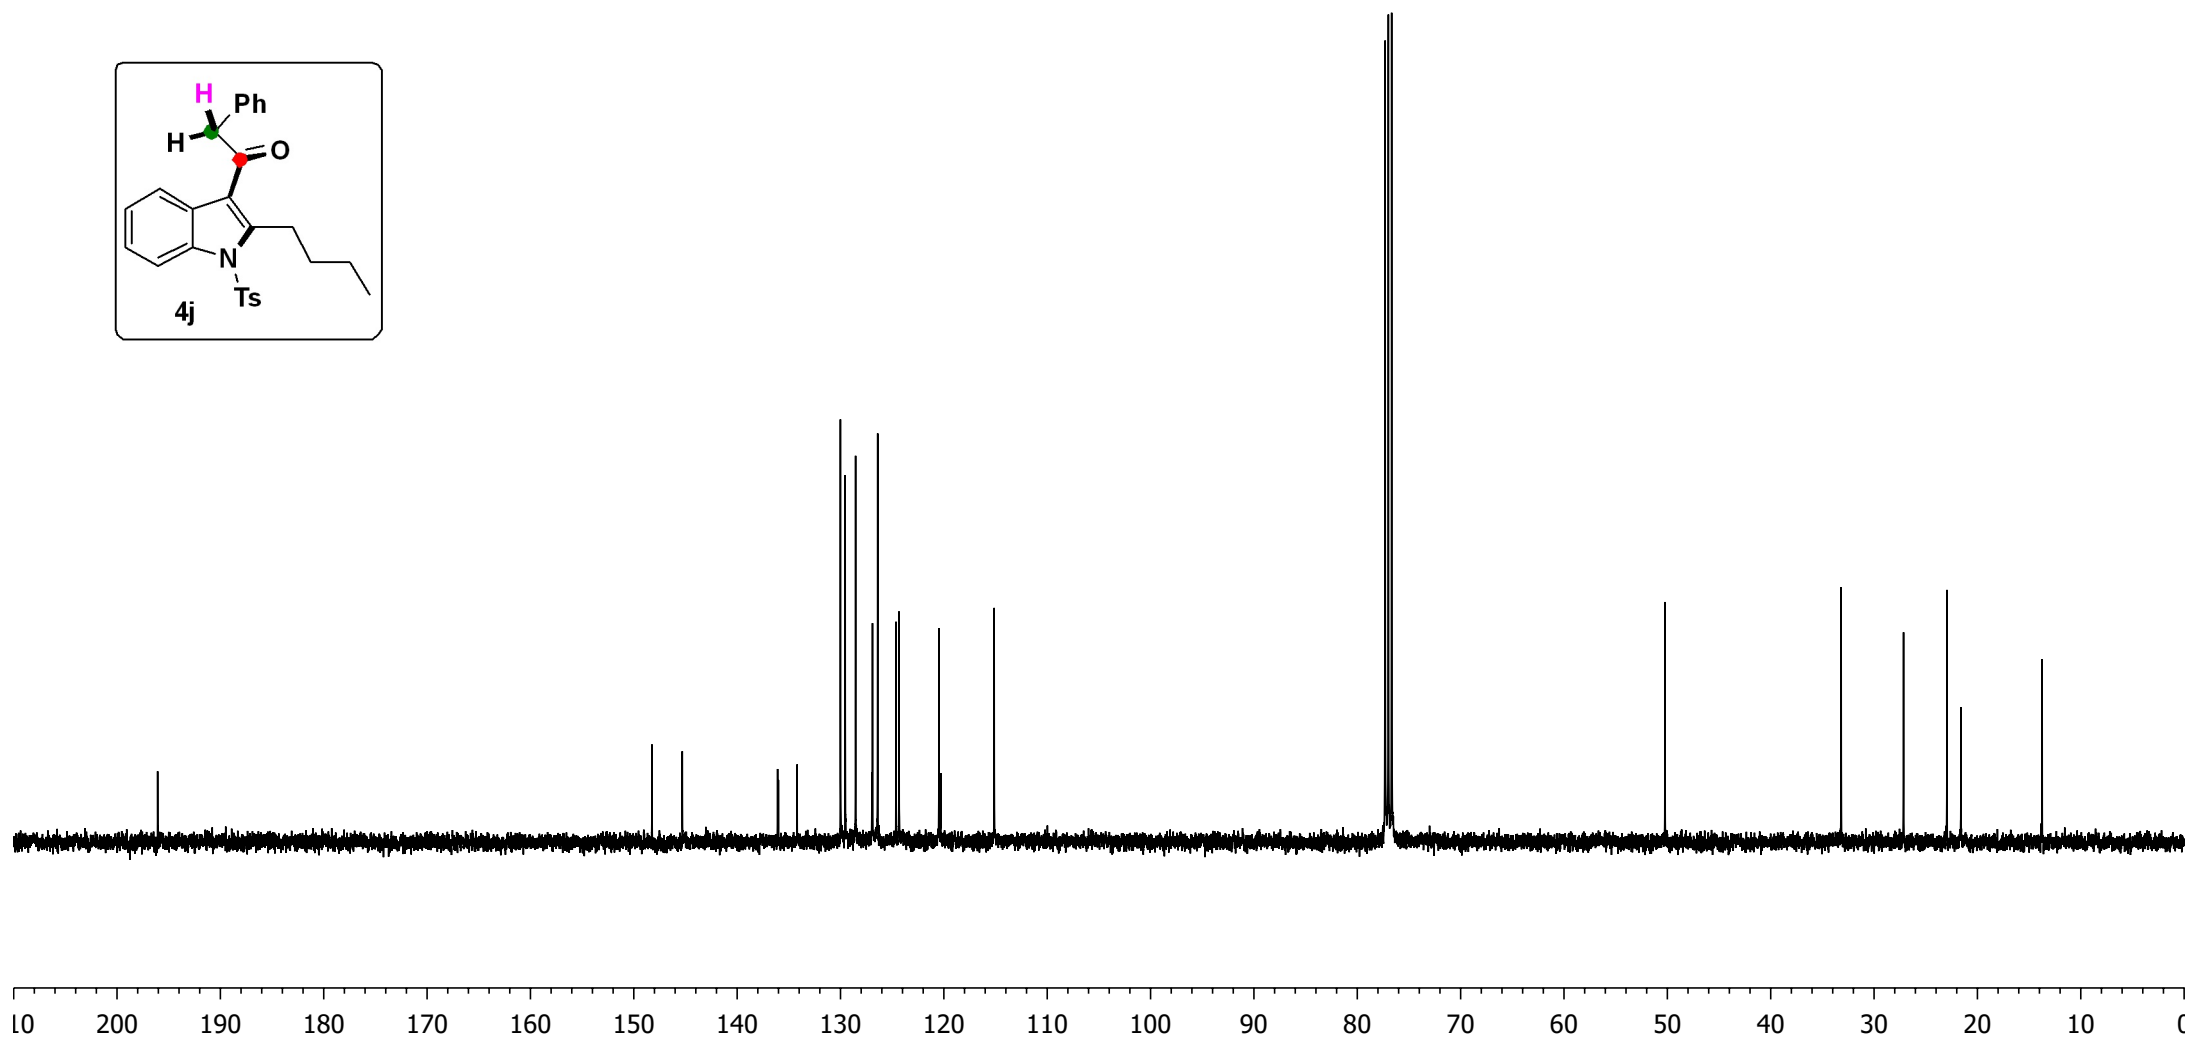

Solvent  $\text{CDCl}_3$   
Spectrometer Frequency 400.28  
Nucleus  $^1\text{H}$

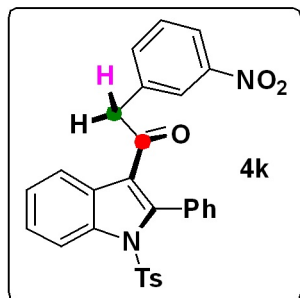

8.40 8.38 8.16 8.16 8.14 8.14 8.14 8.04 8.03 8.03 8.02 8.01 8.01 8.01 7.66 7.61 7.59 7.52 7.50 7.48 7.48 7.46 7.46 7.45 7.44 7.44 7.40 7.40 7.39 7.38 7.38 7.37 7.36 7.36 7.35 7.34 7.34 7.33 7.32 7.32 7.26 7.26 7.25 7.24 7.13 7.11 7.11 3.39 2.35

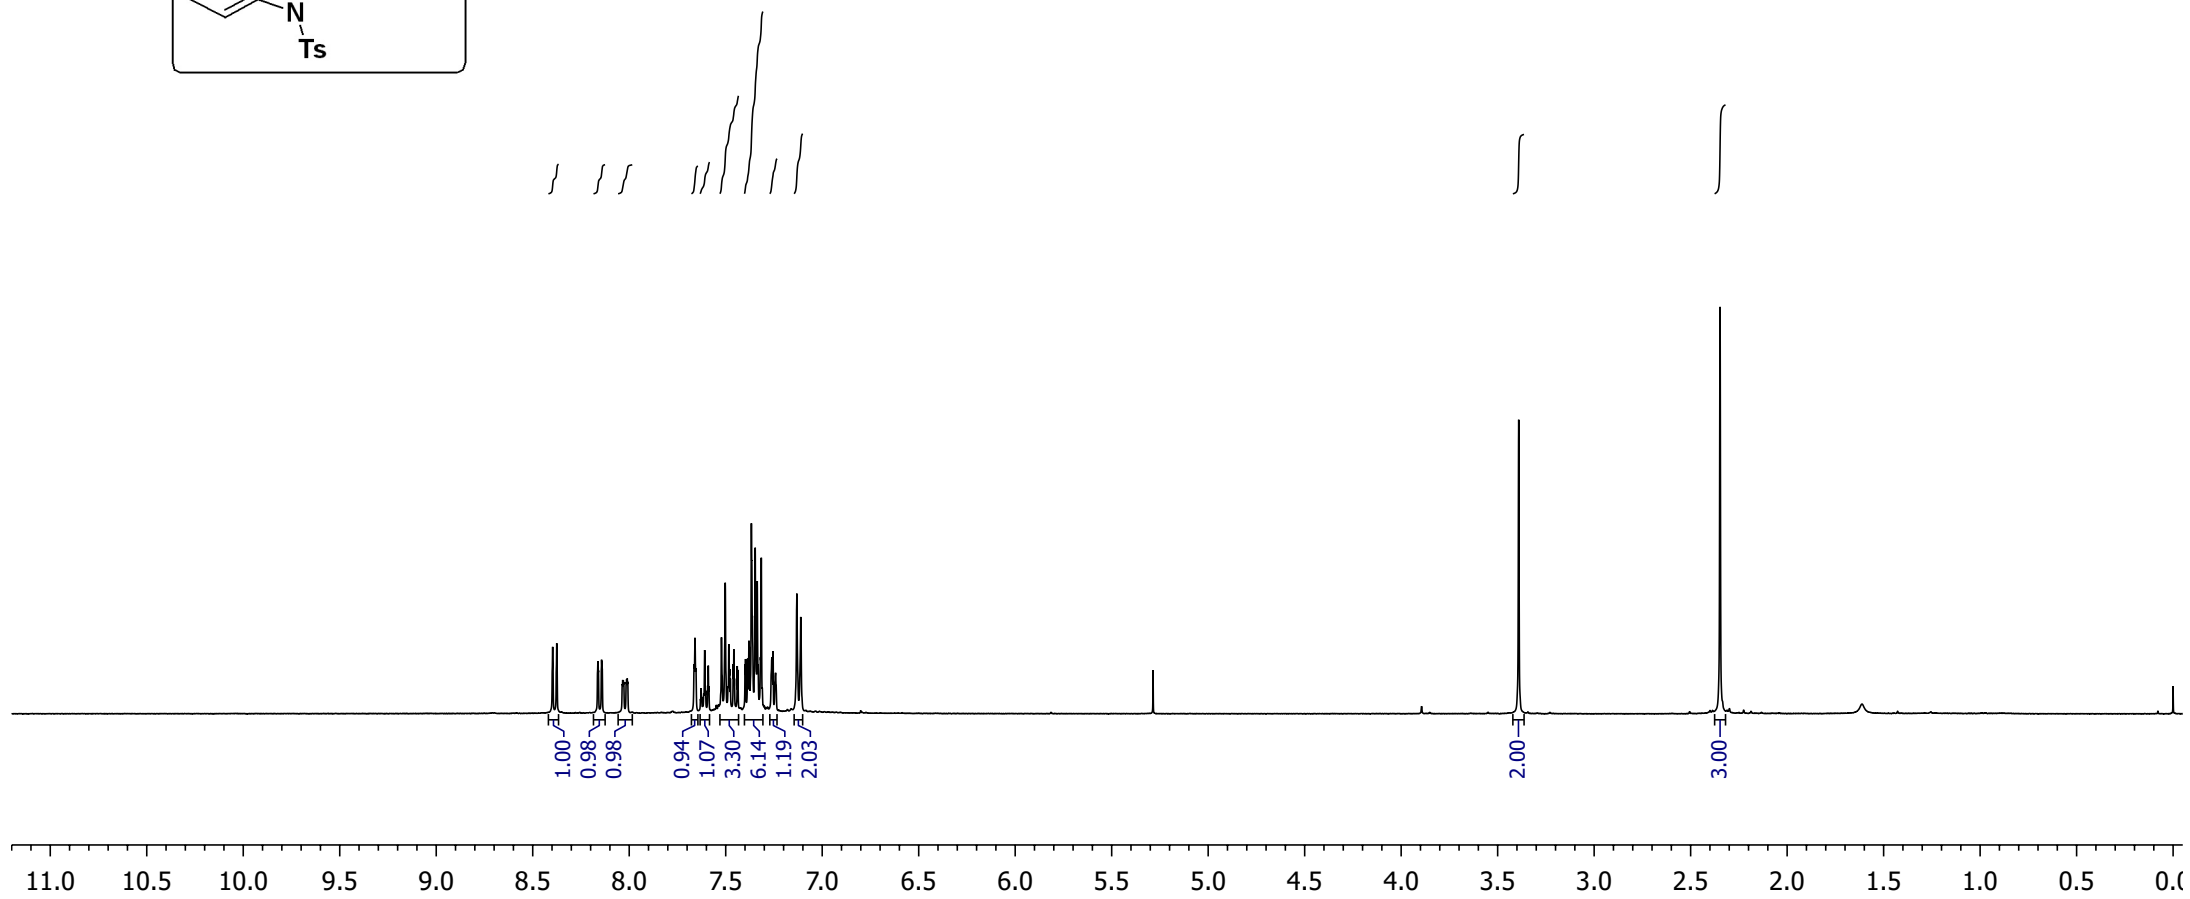

—194.98

—147.94  
—145.61  
—143.63  
—135.79  
—131.65  
—129.65  
—128.95  
—128.07  
—126.95  
—126.12  
—124.50  
—121.93  
—115.78

77.32  
—77.00  
—76.68

—47.51

—21.59

Solvent  $\text{CDCl}_3$   
Spectrometer Frequency 100.66  
Nucleus  $^{13}\text{C}$

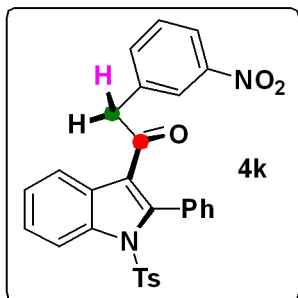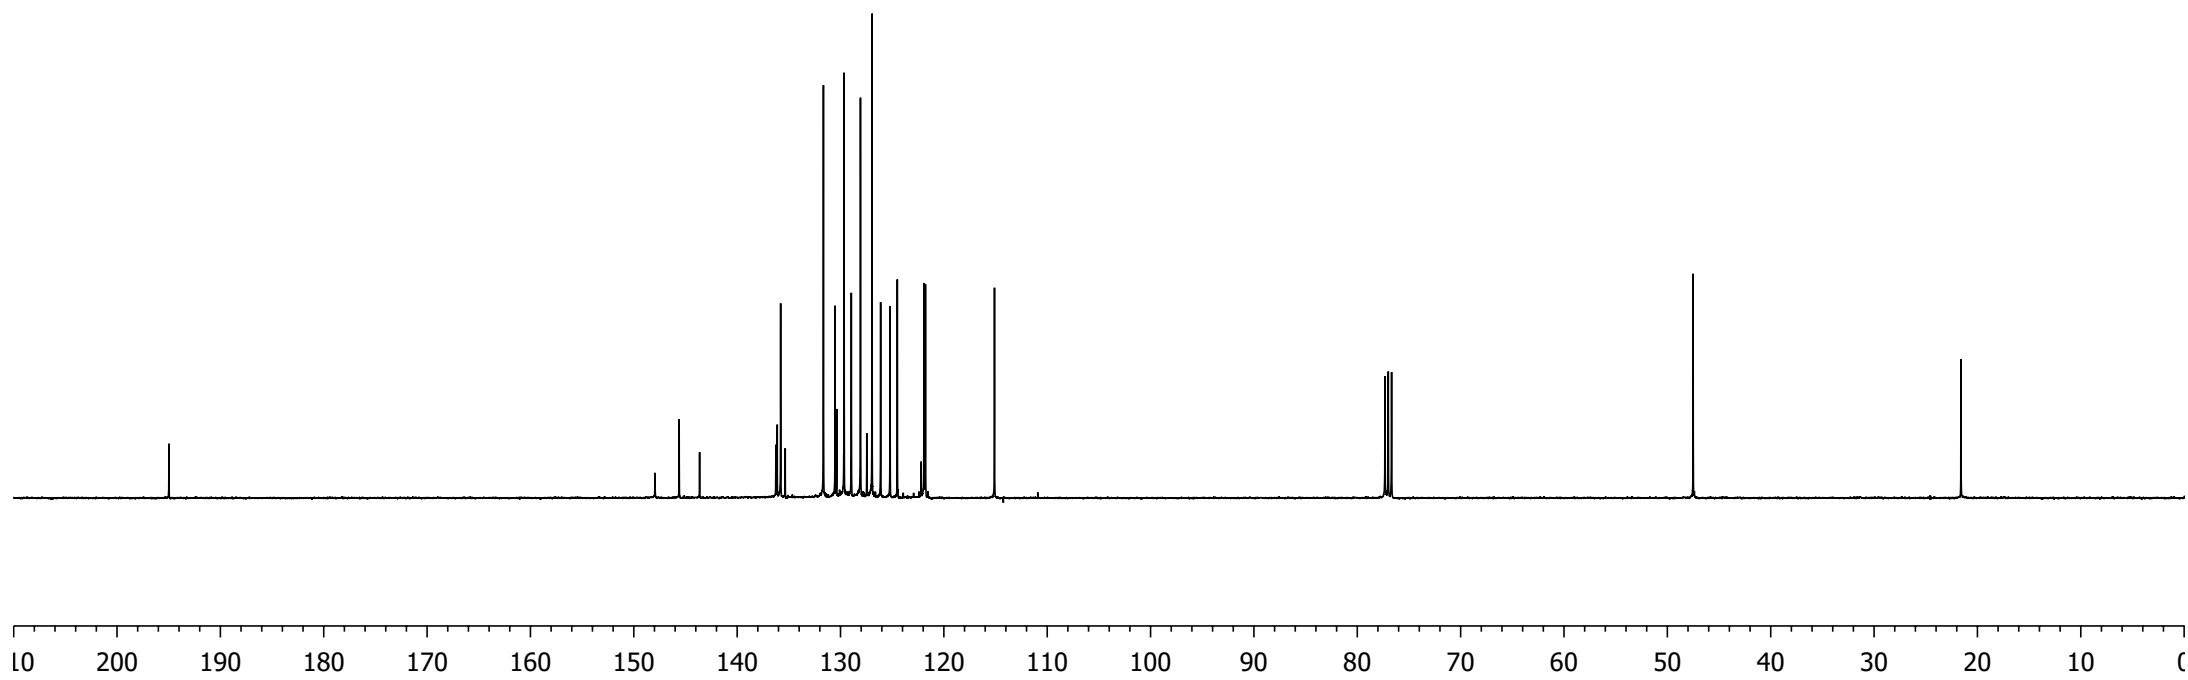

Solvent  $\text{CDCl}_3$   
Spectrometer Frequency 400.28  
Nucleus  $^1\text{H}$

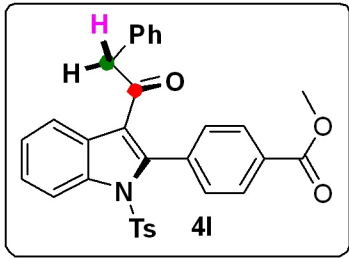

8.37  
8.35  
8.15  
8.13  
8.08  
8.06  
7.44  
7.42  
7.30  
7.26  
7.17  
7.13  
6.84  
6.83  
6.82

4.00

3.33

2.35

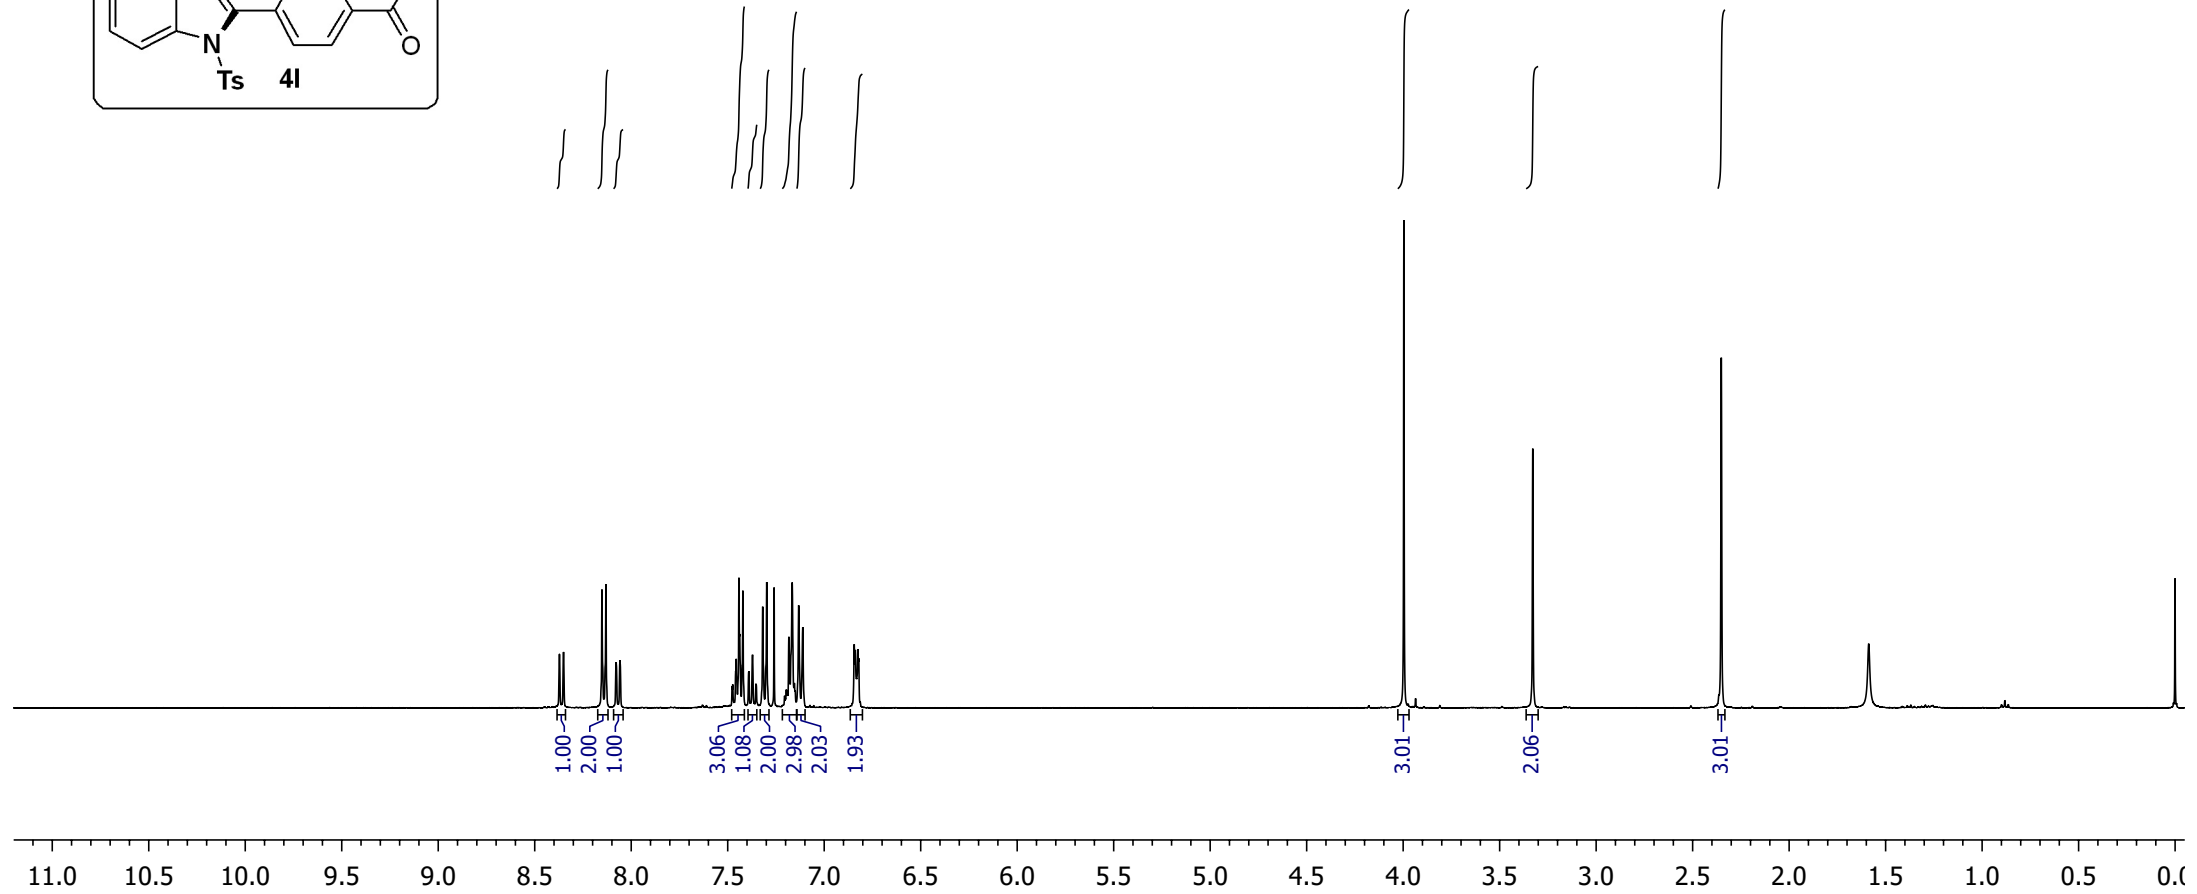

Solvent  $\text{CDCl}_3$   
Spectrometer Frequency 100.66  
Nucleus  $^{13}\text{C}$

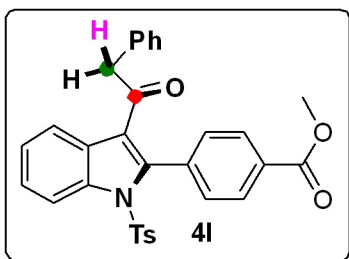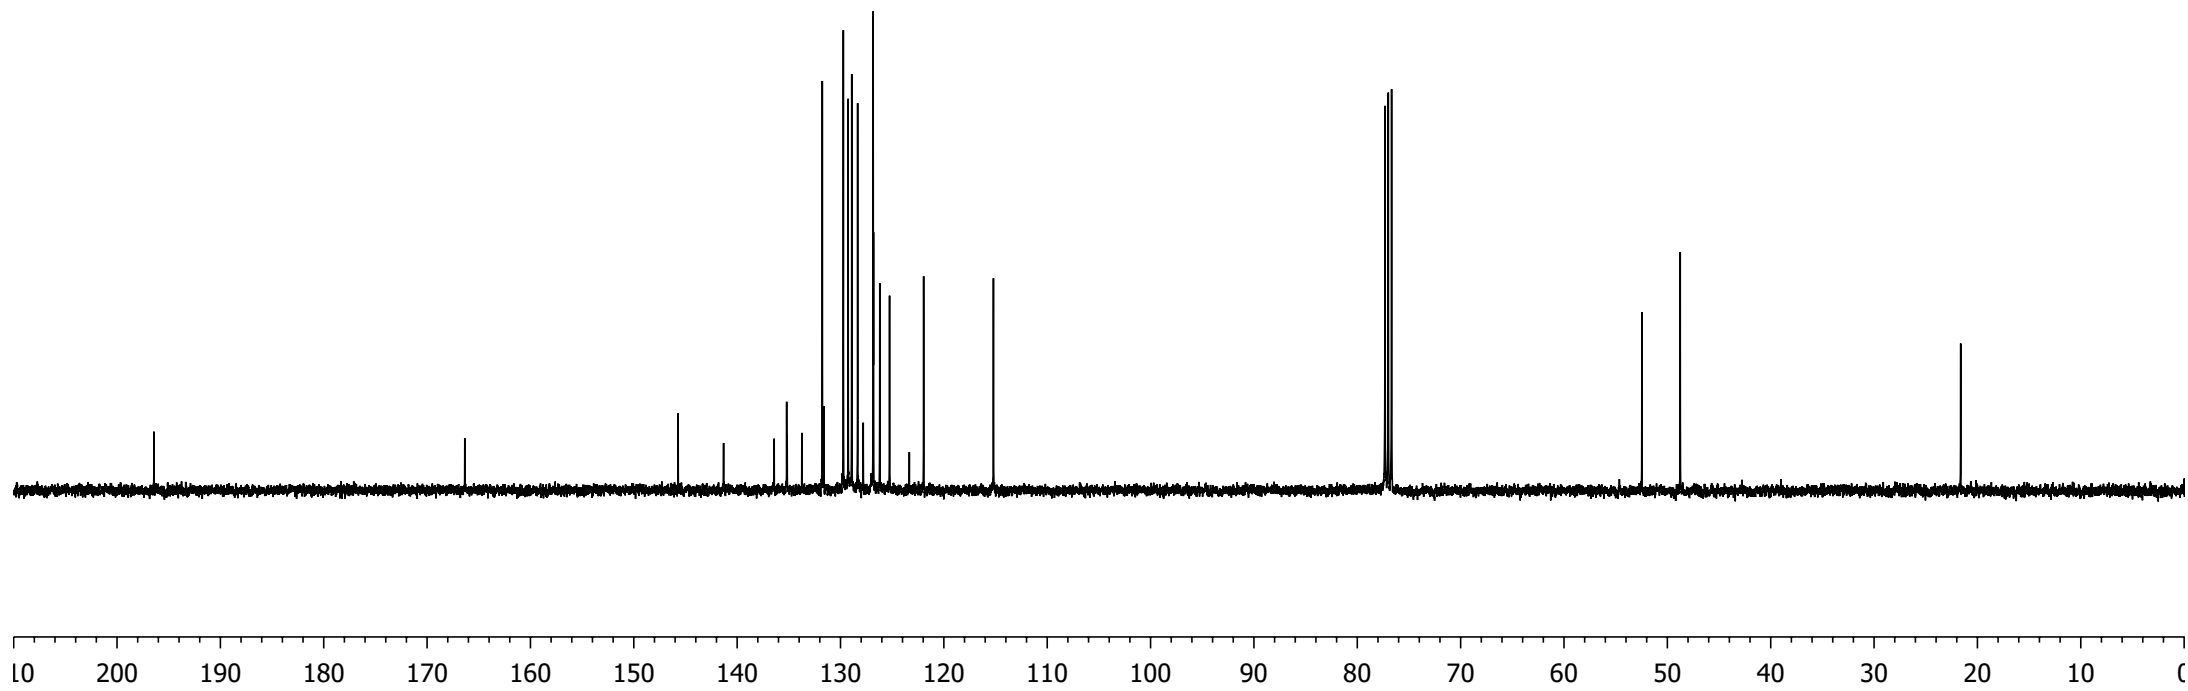

Solvent CDCl<sub>3</sub>  
Spectrometer Frequency 400.28  
Nucleus <sup>1</sup>H

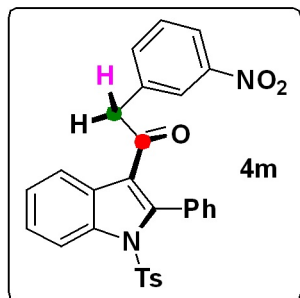

8.40 8.38 8.16 8.16 8.14 8.14 8.14 8.04 8.03 8.03 8.02 8.01 8.01 8.01 7.66 7.61 7.59 7.52 7.50 7.48 7.48 7.46 7.46 7.45 7.44 7.44 7.40 7.40 7.39 7.38 7.38 7.37 7.36 7.36 7.35 7.34 7.34 7.33 7.32 7.32 7.26 7.26 7.25 7.24 7.13 7.11 7.39

2.35

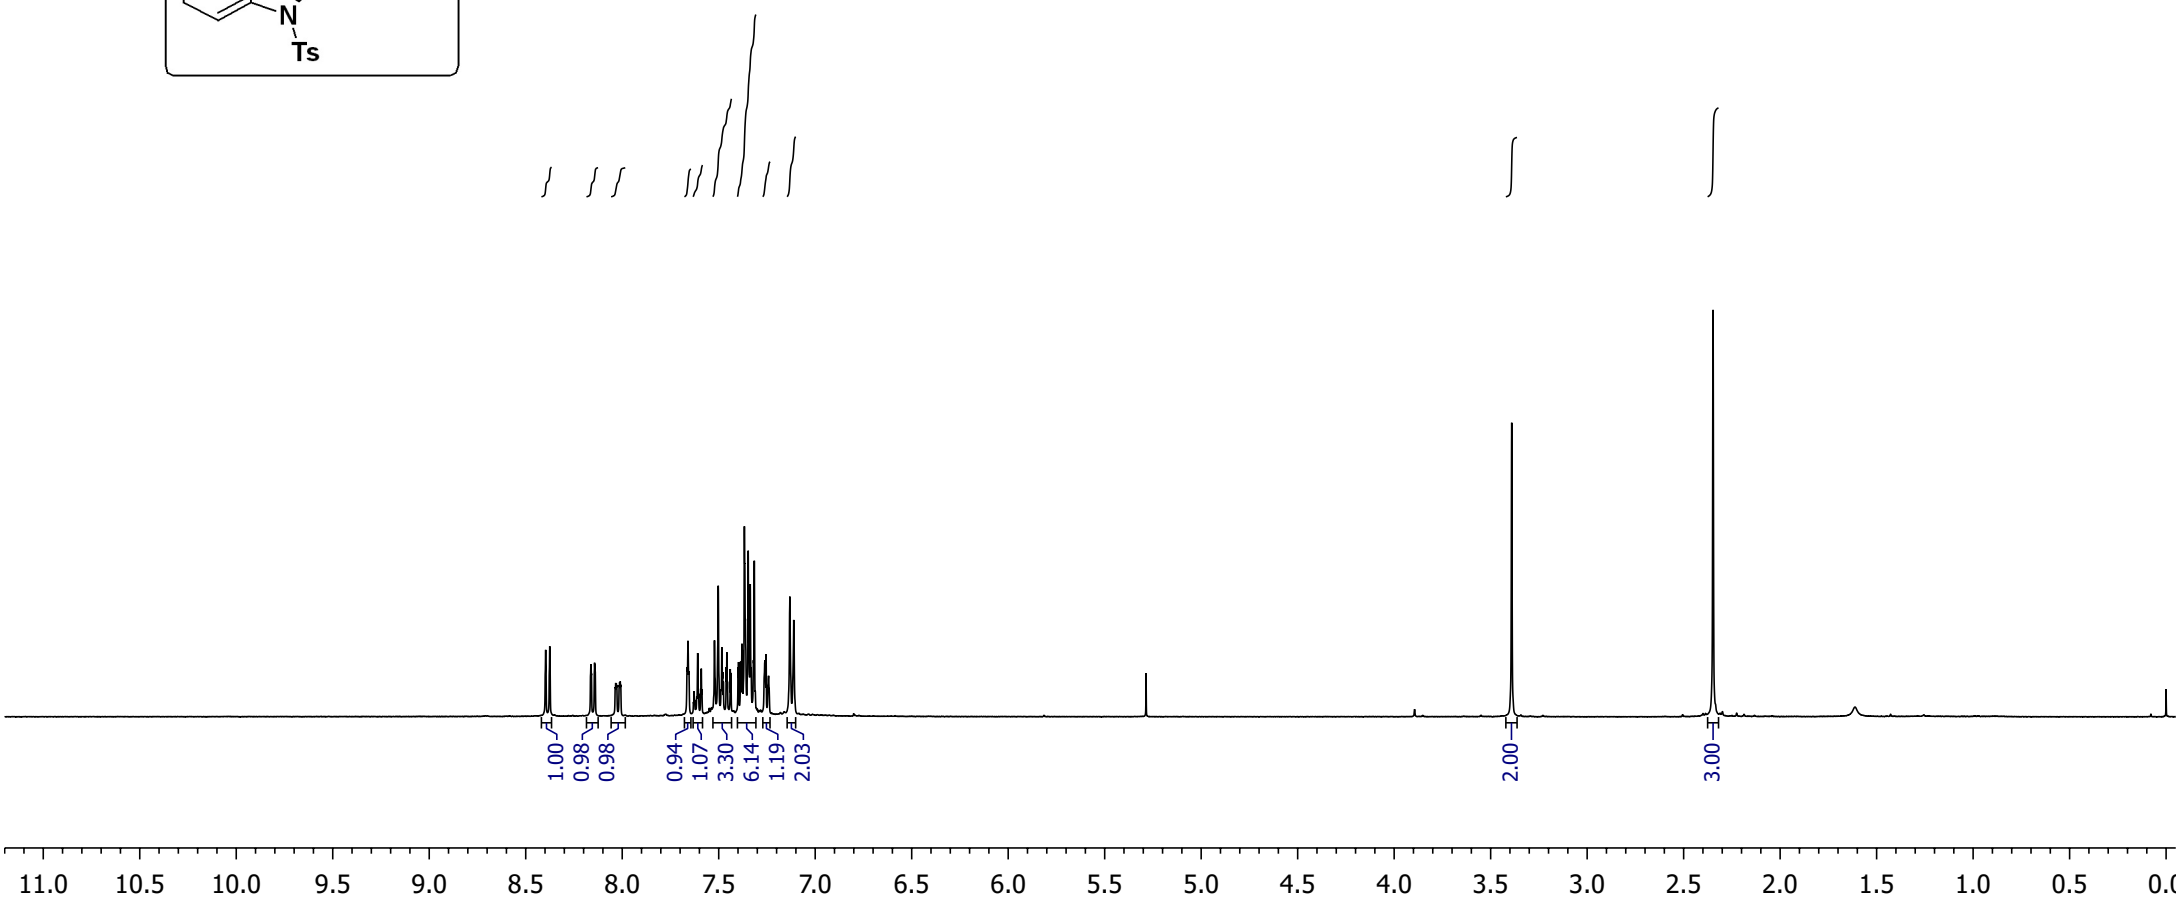

—194.98

—147.94  
—145.61  
—143.63  
—135.79  
—131.65  
—129.65  
—128.95  
—128.07  
—126.95  
—126.12  
—124.50  
—121.93  
—115.78

77.32  
—77.00  
—76.68

—47.51

—21.59

Solvent  $\text{CDCl}_3$   
Spectrometer Frequency 100.66  
Nucleus  $^{13}\text{C}$



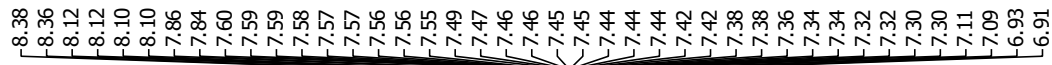

Solvent  $\text{CDCl}_3$   
Spectrometer Frequency 400.39  
Nucleus  $^1\text{H}$

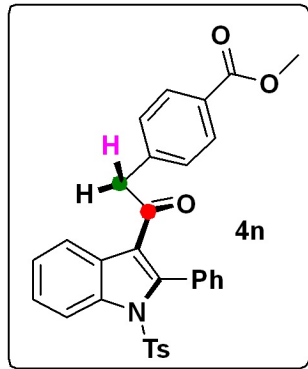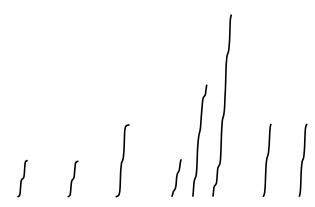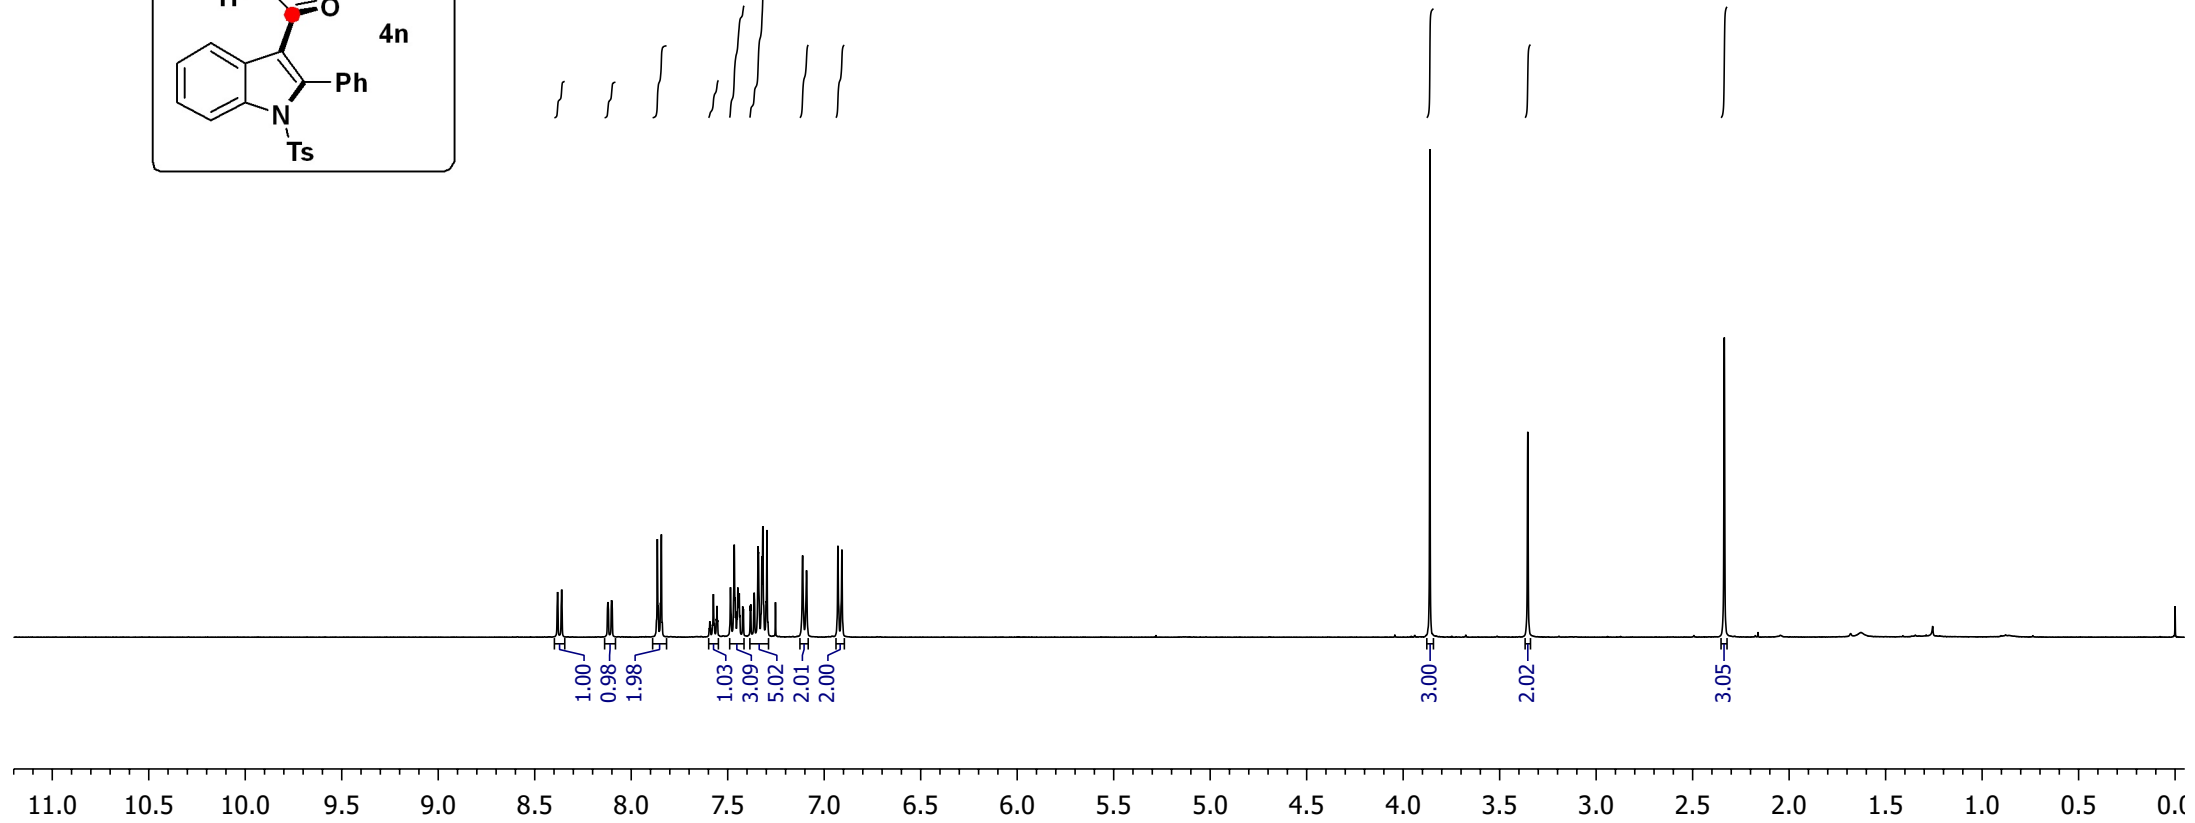



M0474-6  
MC-20-29-1

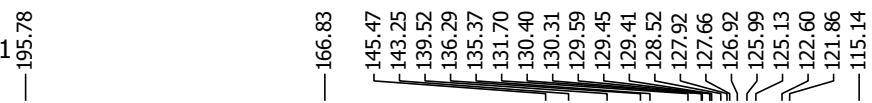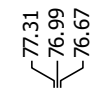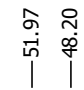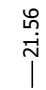

S73

Solvent  $\text{CDCl}_3$   
Spectrometer Frequency 100.69  
Nucleus  $^{13}\text{C}$

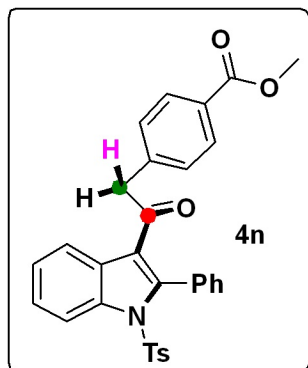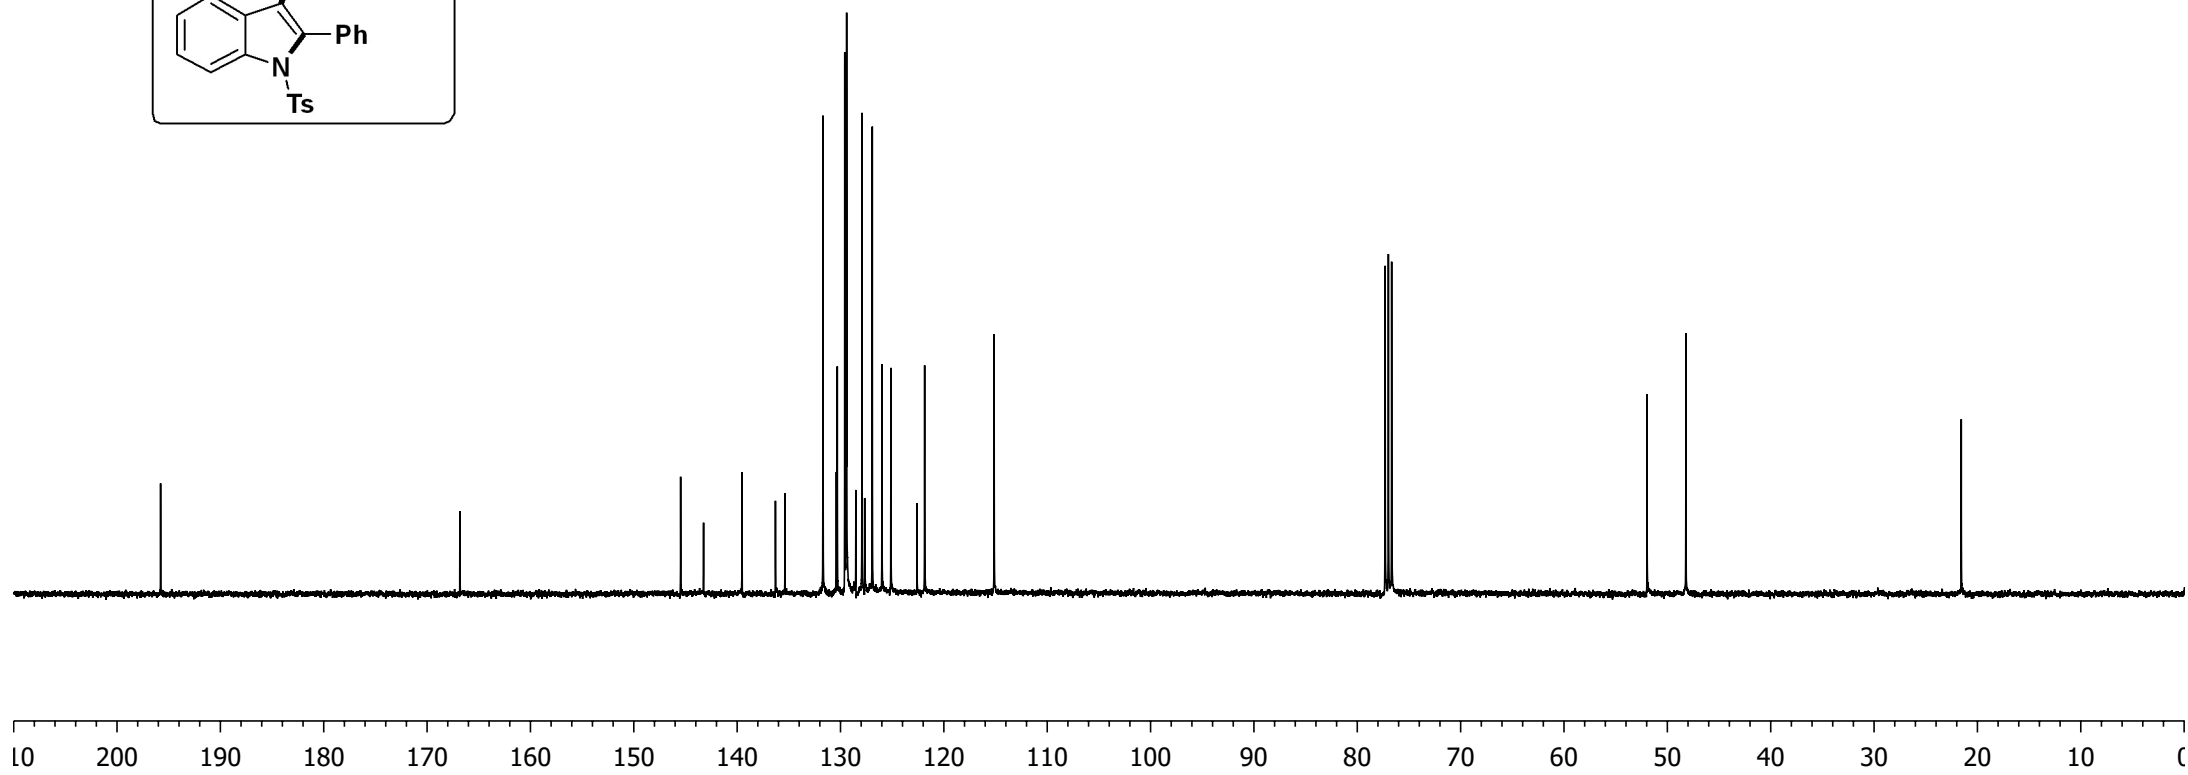

Solvent  $\text{CDCl}_3$   
Spectrometer Frequency 400.39  
Nucleus  $^1\text{H}$

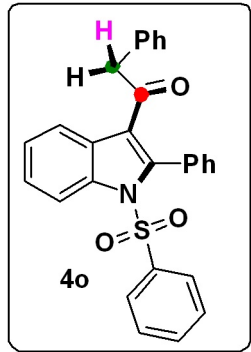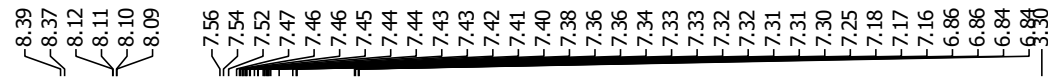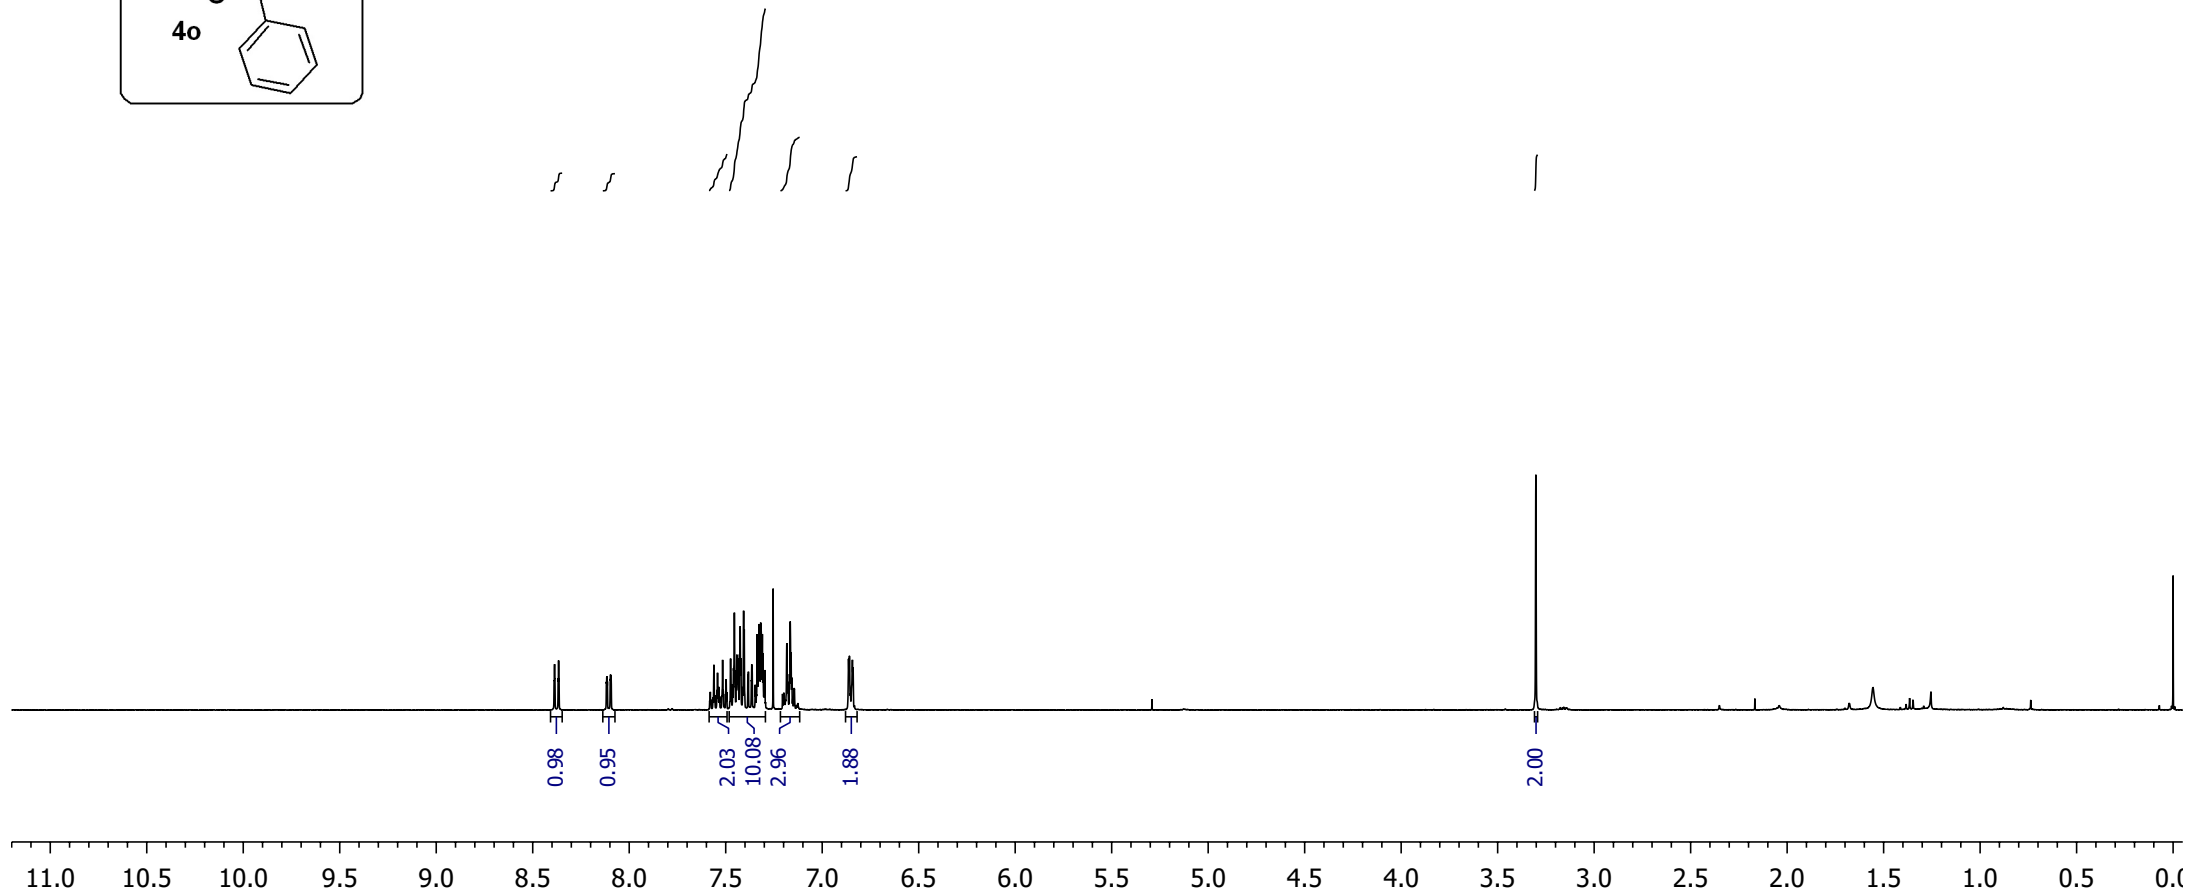

142.89  
138.42  
136.42  
134.14  
131.79  
130.37  
130.26  
129.36  
129.00  
128.25  
127.90  
127.82  
126.89  
126.67  
126.00  
125.14  
122.98  
121.97  
115.10

77.31  
76.99  
76.67

48.44

Solvent  $\text{CDCl}_3$   
Spectrometer Frequency 100.69  
Nucleus  $^{13}\text{C}$

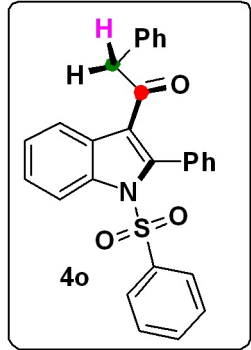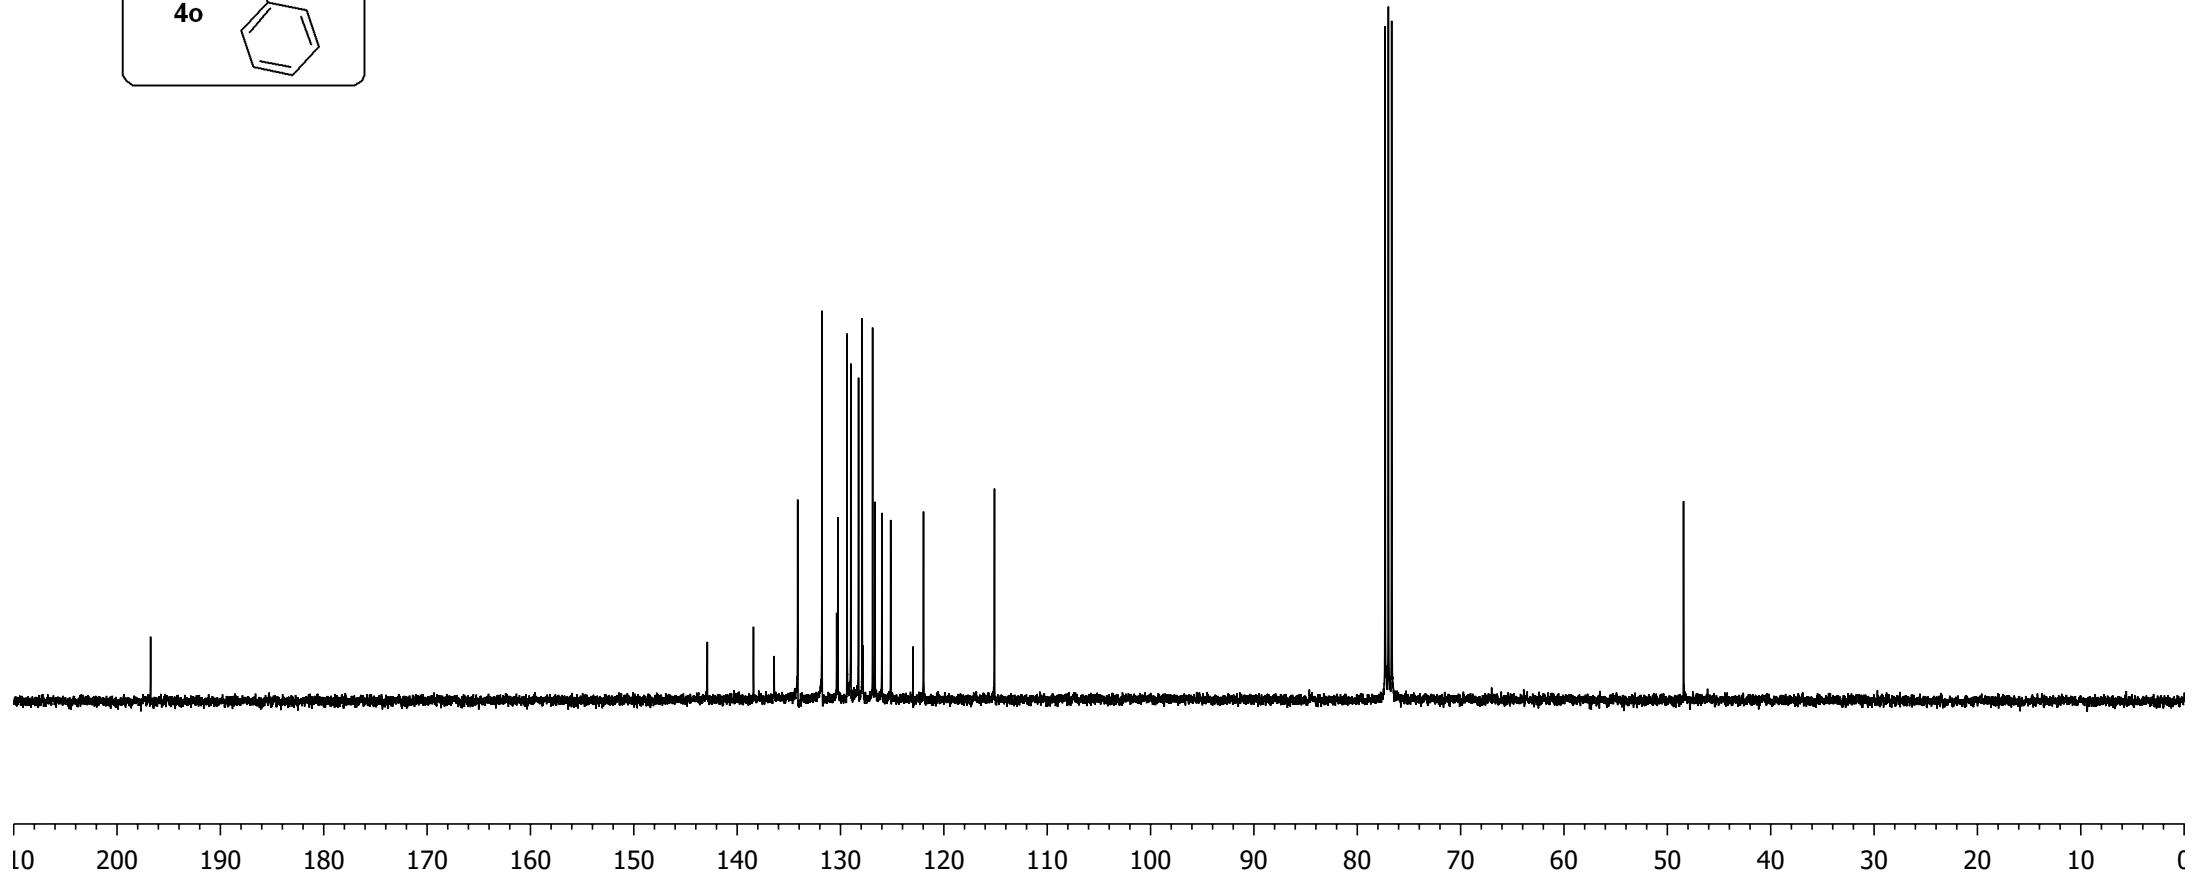

Solvent  $\text{CDCl}_3$   
Spectrometer Frequency 400.39  
Nucleus  $^1\text{H}$

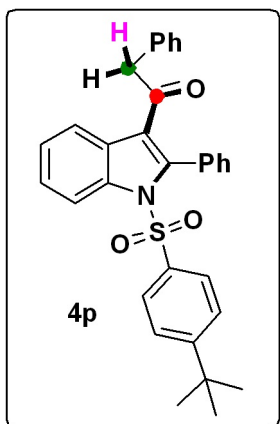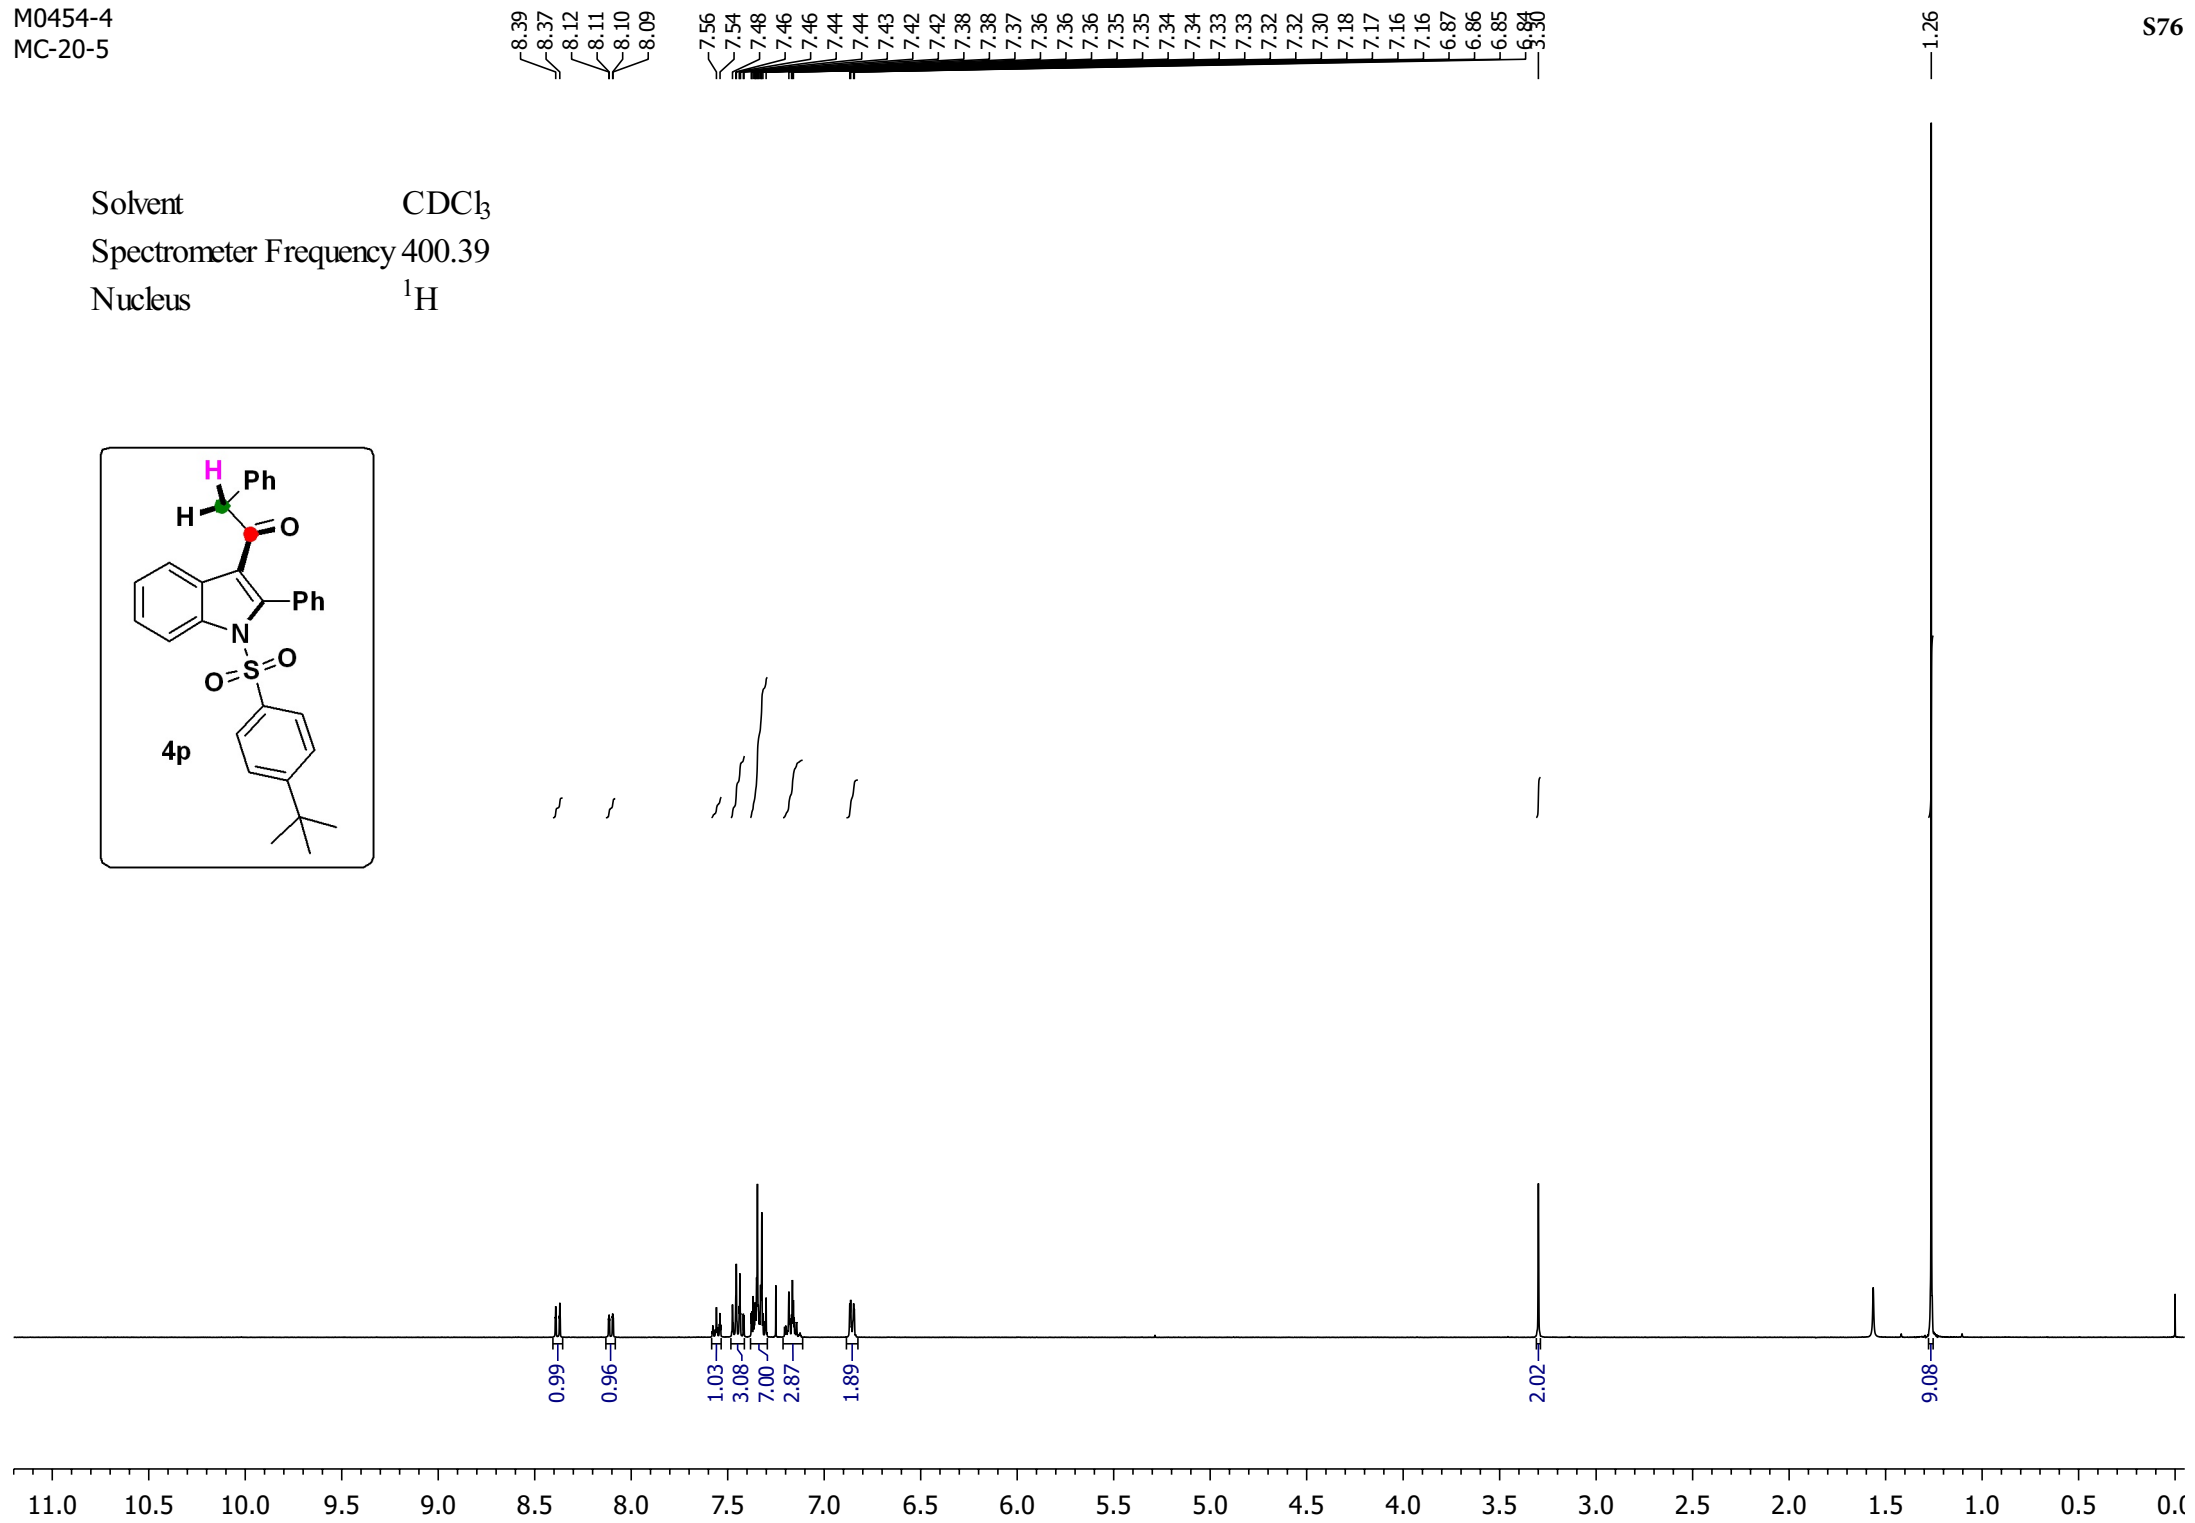

M0454-5  
MC-20-5

—196.86

—158.29

—142.93

131.76

129.38

128.24

127.85

126.86

126.65

126.03

125.89

125.02

121.88

77.31

76.99

76.67

—48.42

—35.25

—30.89

S77

Solvent  $\text{CDCl}_3$   
Spectrometer Frequency 100.69  
Nucleus  $^{13}\text{C}$

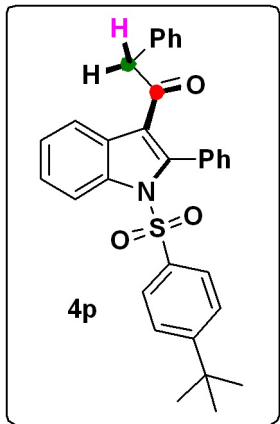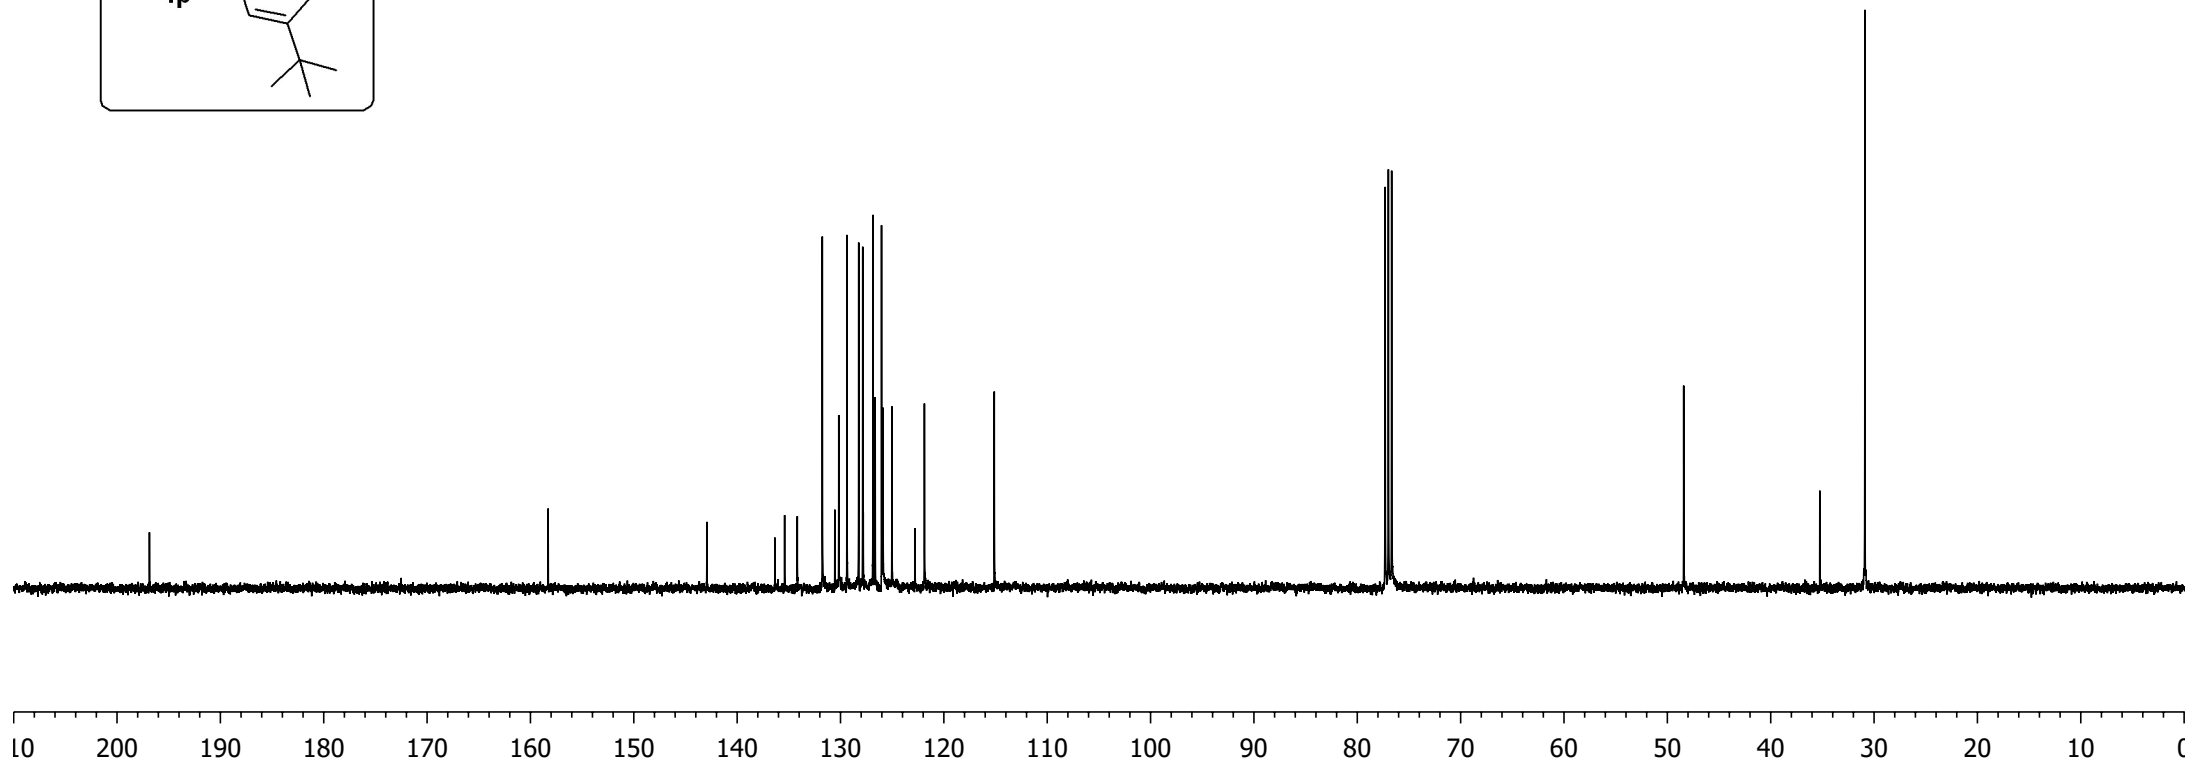

Solvent  $\text{CDCl}_3$   
Spectrometer Frequency 400.39  
Nucleus  $^1\text{H}$

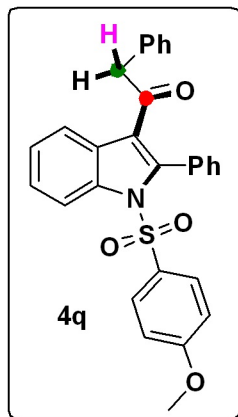

8.38  
8.36  
8.11  
8.11  
8.09  
8.09  
7.56  
7.54  
7.49  
7.47  
7.47  
7.45  
7.45  
7.43  
7.43  
7.41  
7.41  
7.37  
7.37  
7.36  
7.36  
7.35  
7.35  
7.34  
7.34  
7.18  
7.18  
7.17  
7.17  
7.16  
7.16  
7.16  
6.87  
6.86  
6.85  
6.84  
6.76  
6.76  
3.79

3.30

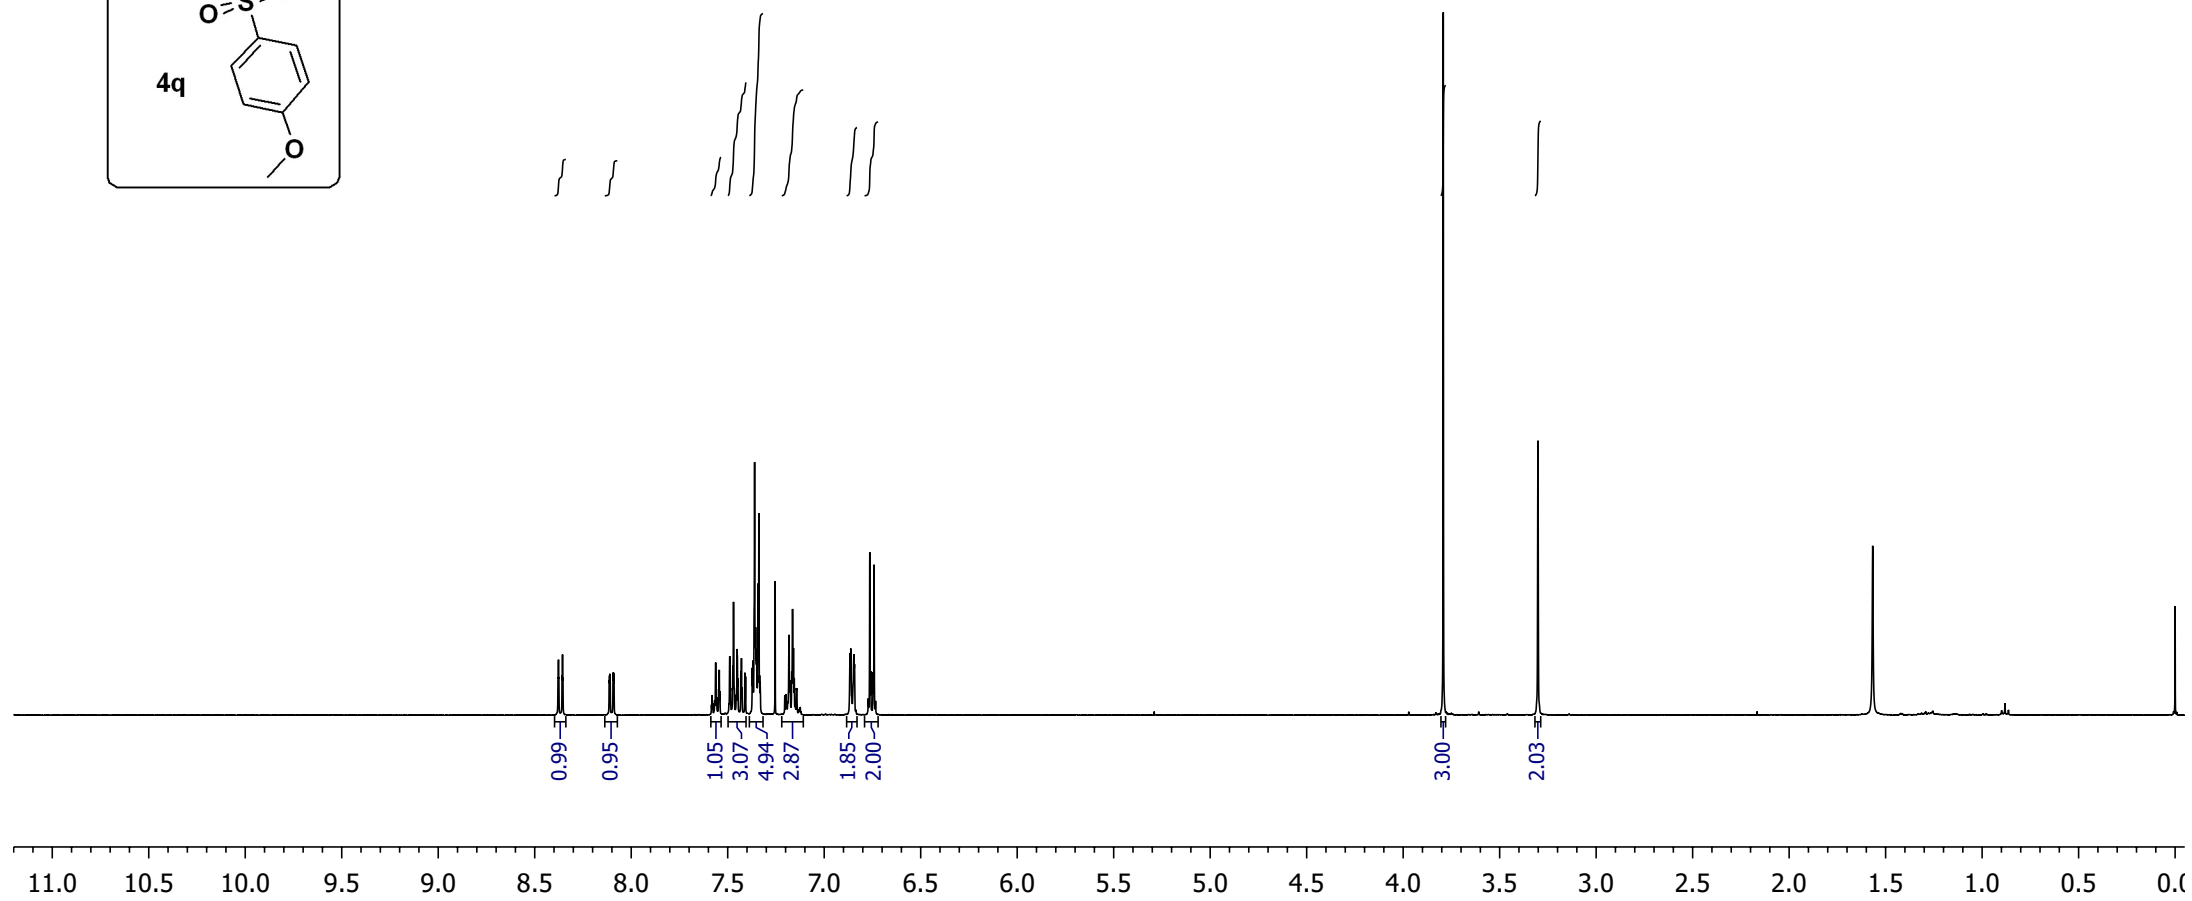

M0454-11  
MC-20-8

—196.80

—164.01

—142.96

131.77

130.19

129.37

129.27

128.23

127.86

126.64

125.84

121.94

115.74

114.14

77.31

76.99

76.67

—55.67

—48.41

S79

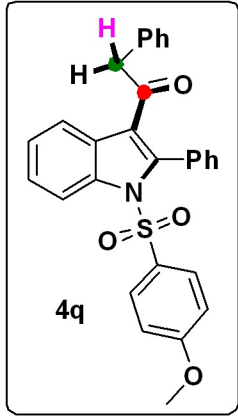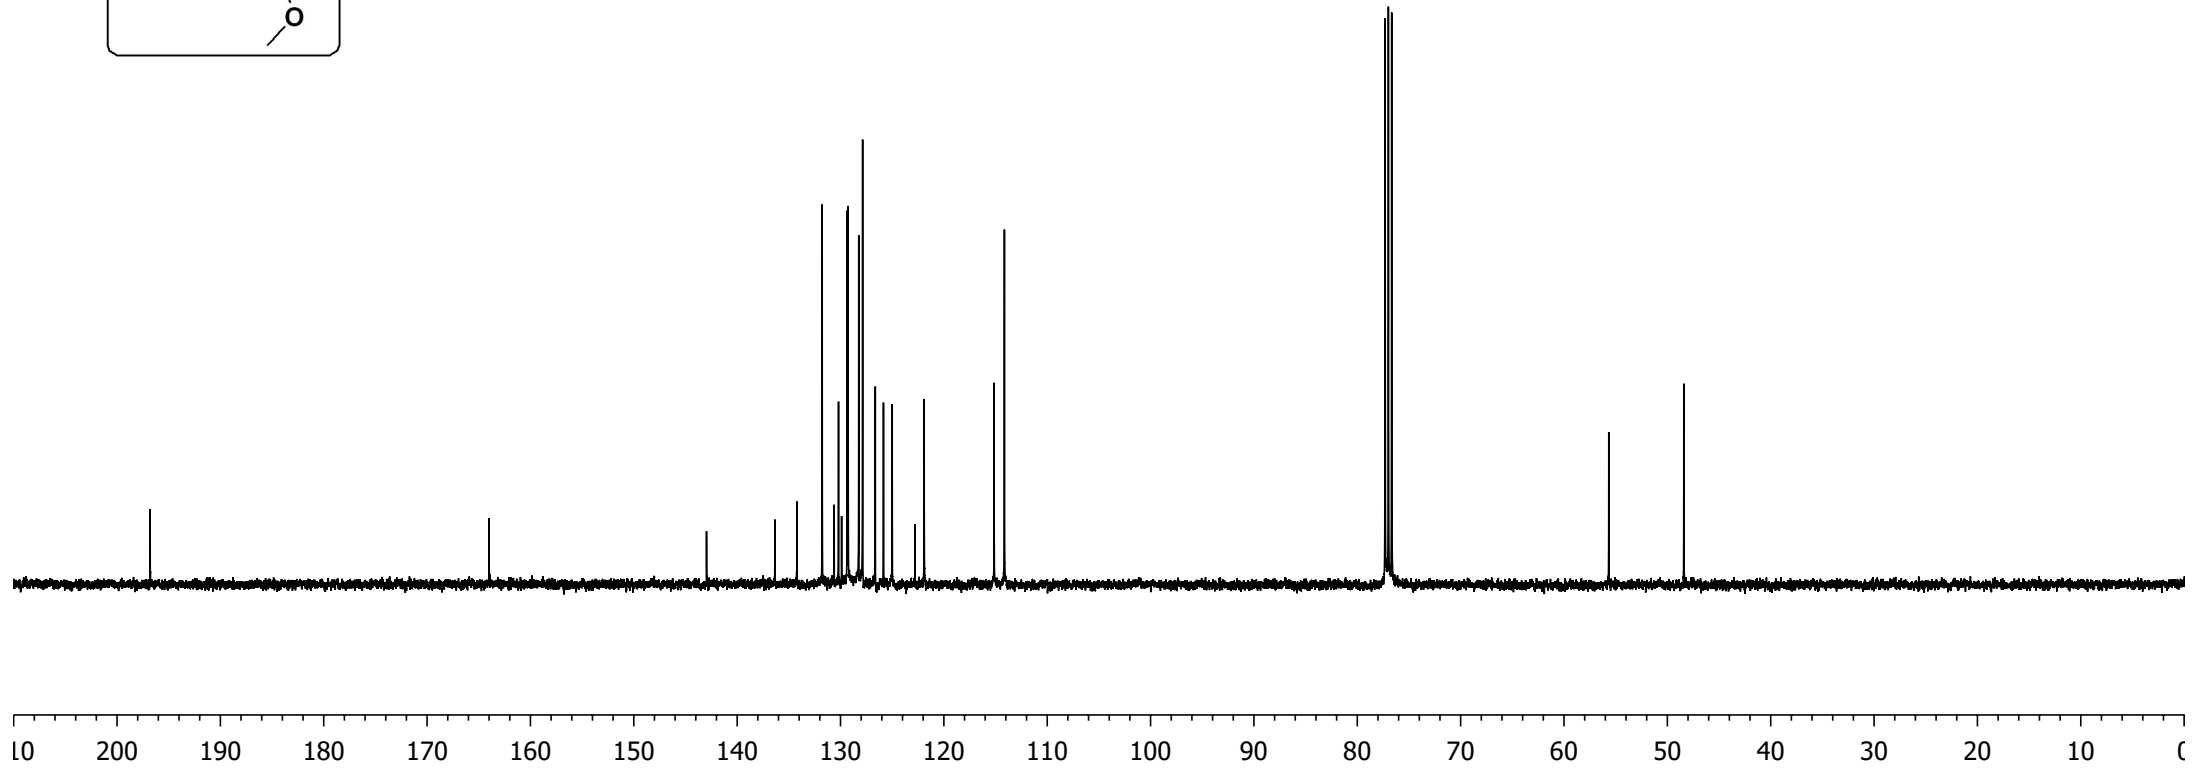

8.35  
8.33  
8.10  
8.10  
8.08  
8.08  
7.47  
7.34  
7.34  
7.32  
7.29  
7.17  
6.86  
6.84  
6.84

3.31

Solvent CDCl<sub>3</sub>  
Spectrometer Frequency 400.28  
Nucleus <sup>1</sup>H

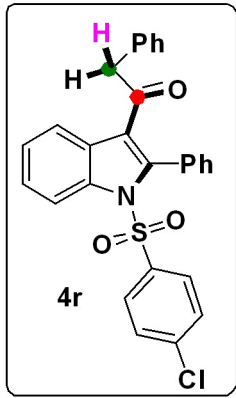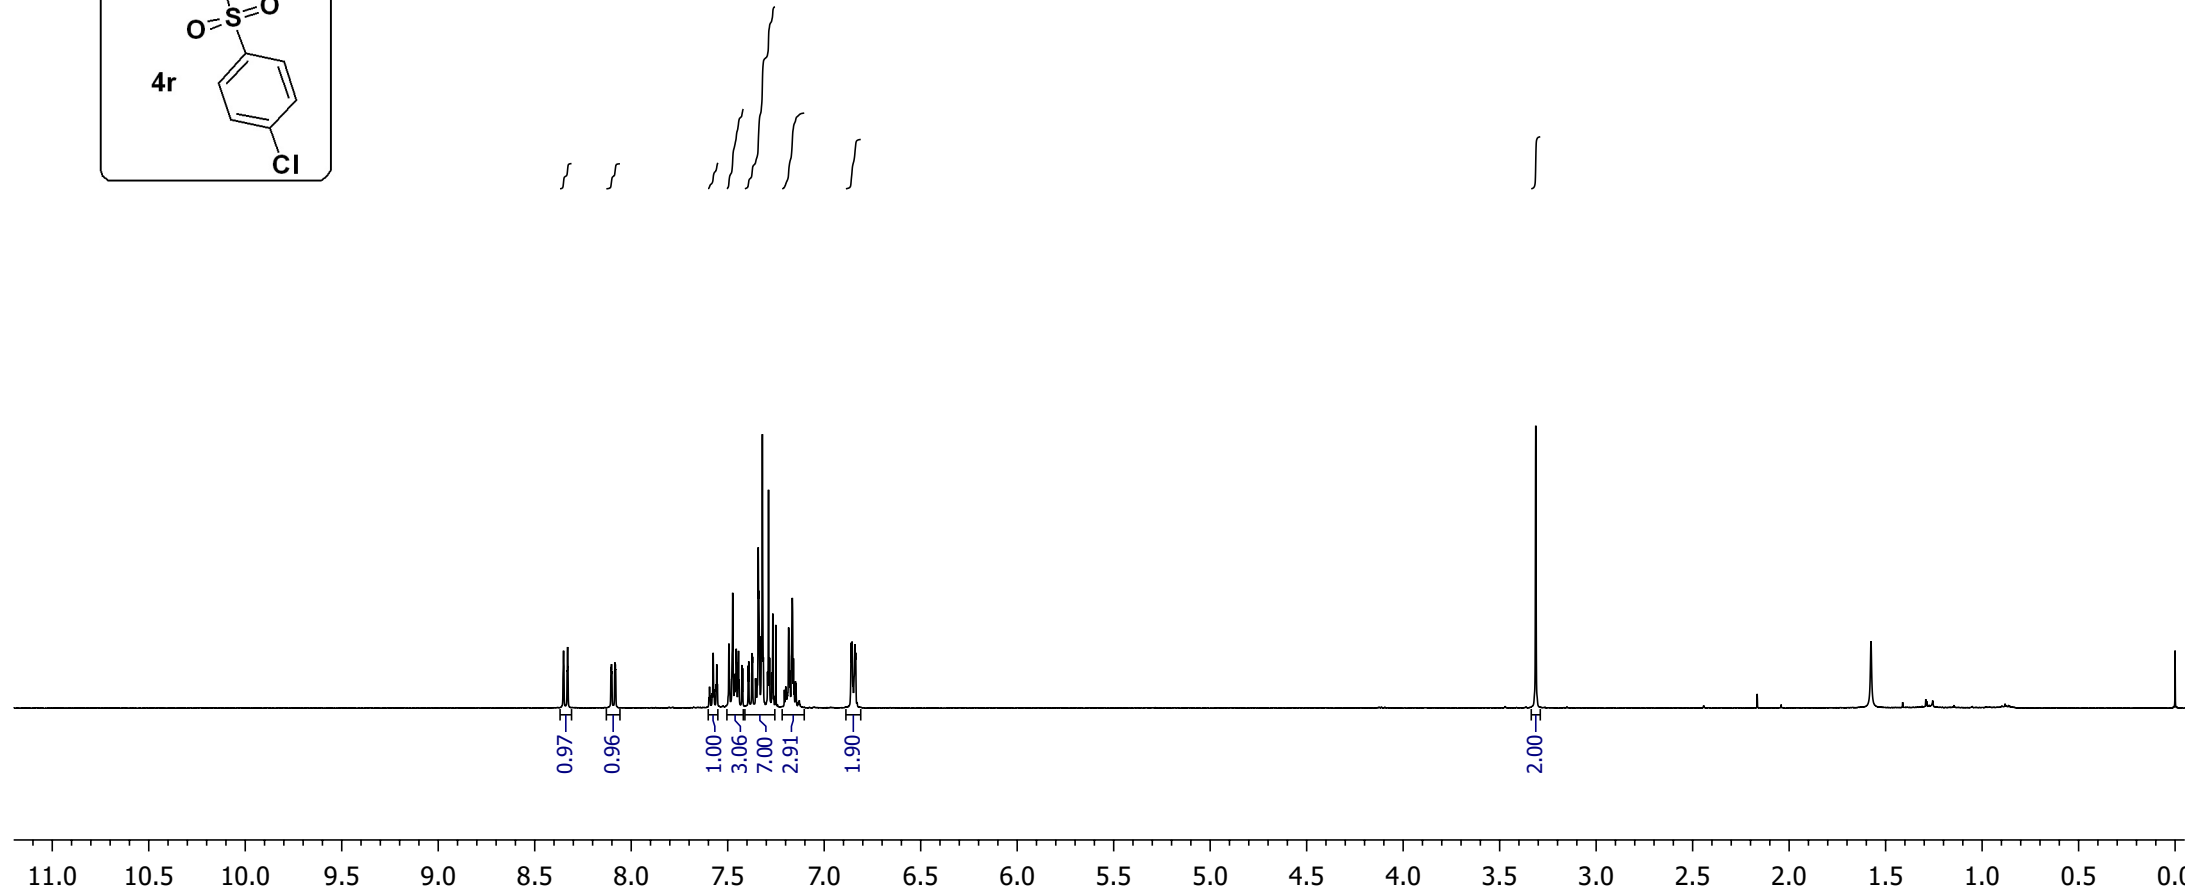



142.60  
140.95  
136.67  
136.32  
133.99  
131.77  
130.41  
130.22  
129.34  
128.31  
128.27  
127.99  
127.91  
126.71  
126.15  
125.34  
122.07  
115.08

77.32  
77.00  
76.68

48.48

Solvent  $\text{CDCl}_3$   
Spectrometer Frequency 100.66  
Nucleus  $^{13}\text{C}$

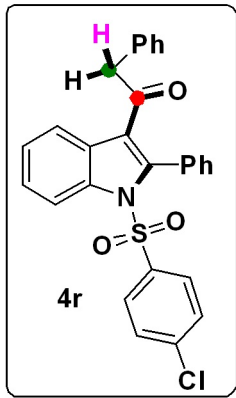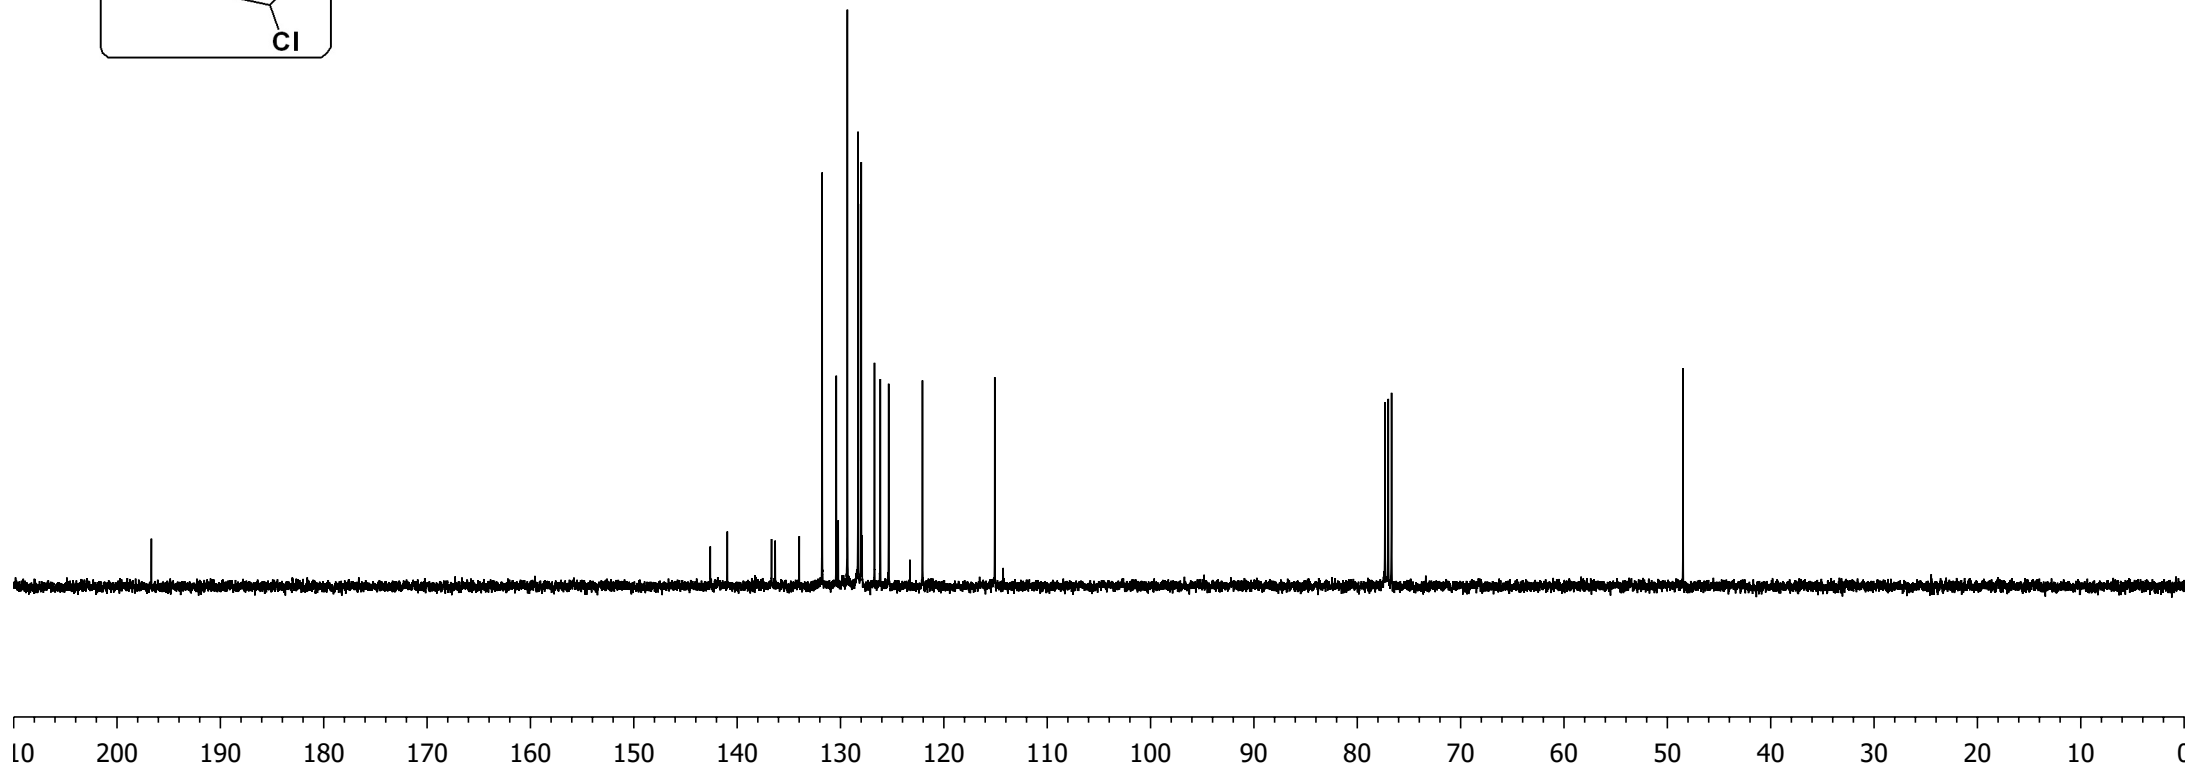

8.35  
8.33  
8.10  
8.10  
8.08  
8.08  
7.47  
7.46  
7.44  
7.26  
7.24  
7.17  
6.86  
6.84  
6.84

3.31

Solvent  $\text{CDCl}_3$   
Spectrometer Frequency 400.28  
Nucleus  $^1\text{H}$

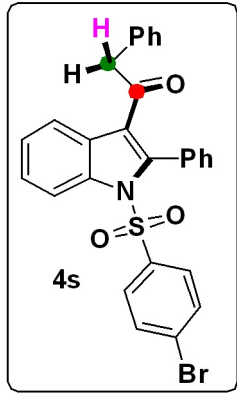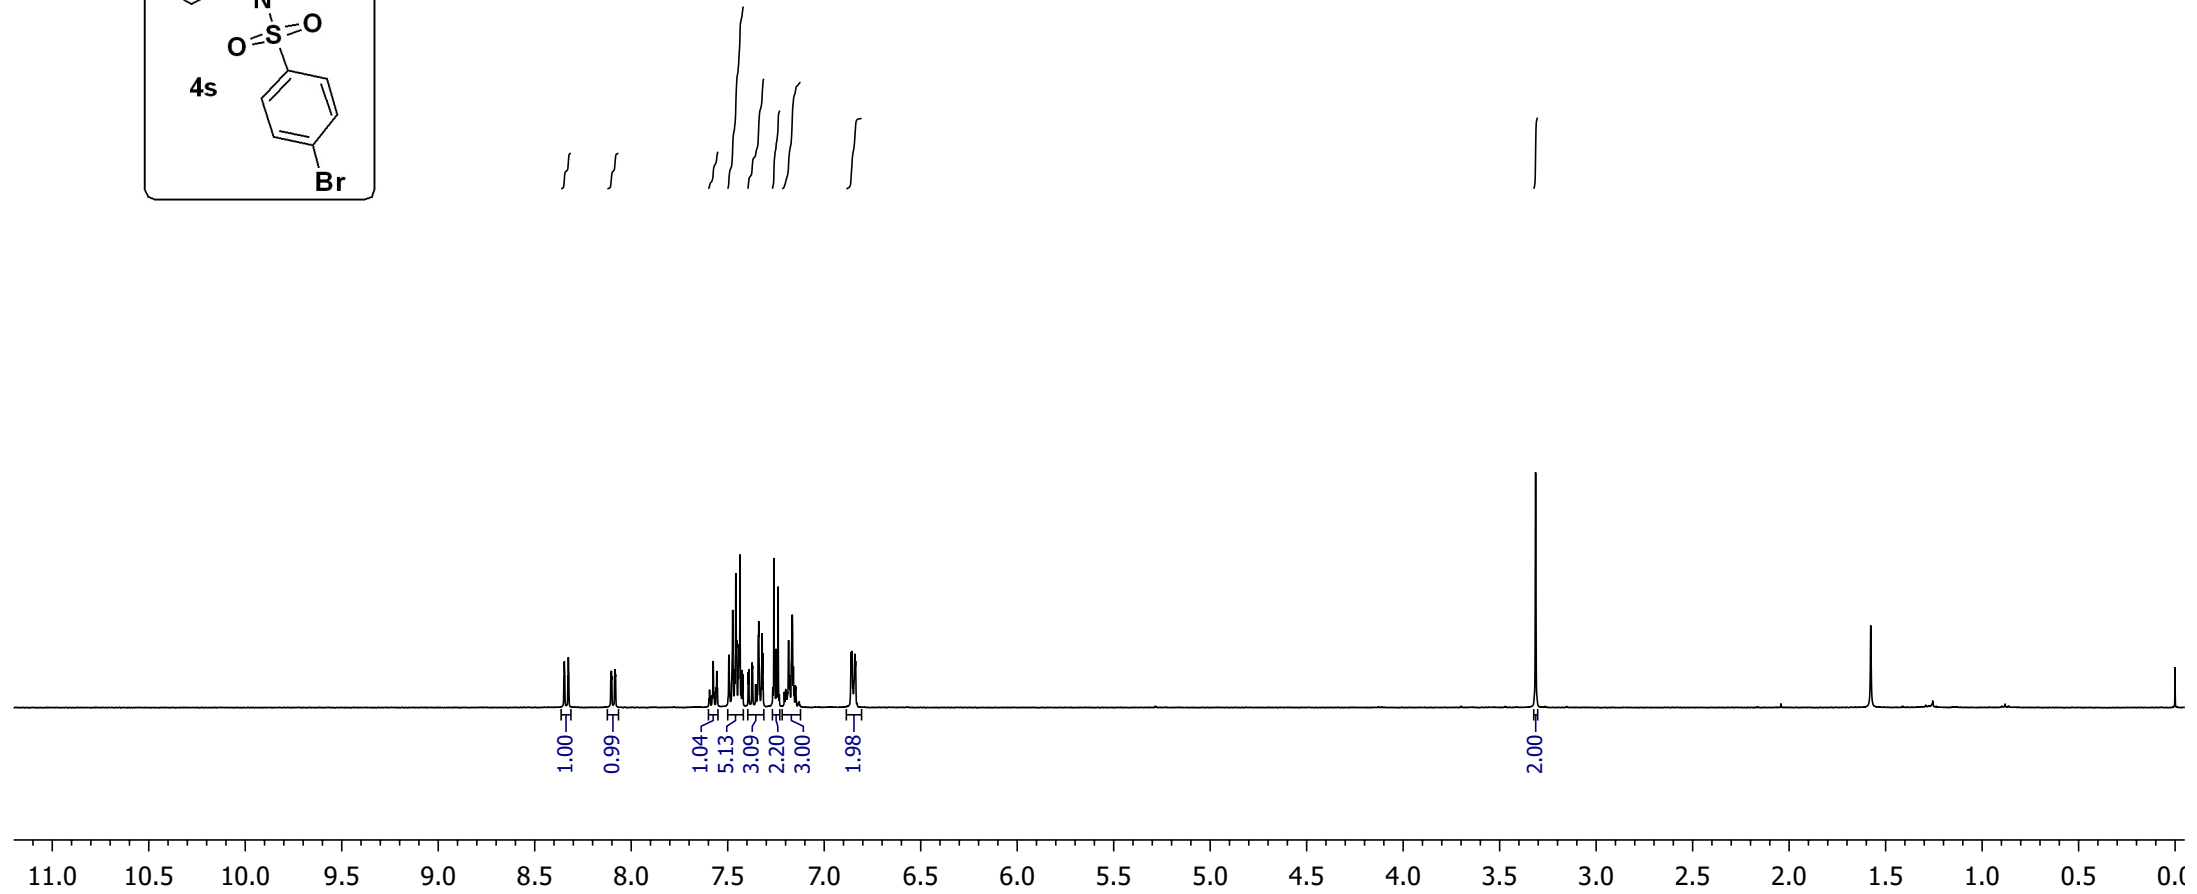

Solvent  $\text{CDCl}_3$   
Spectrometer Frequency 100.66  
Nucleus  $^{13}\text{C}$

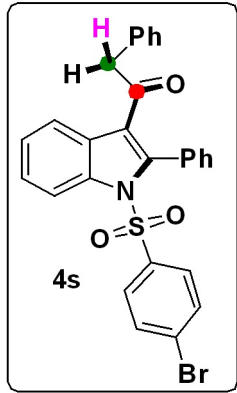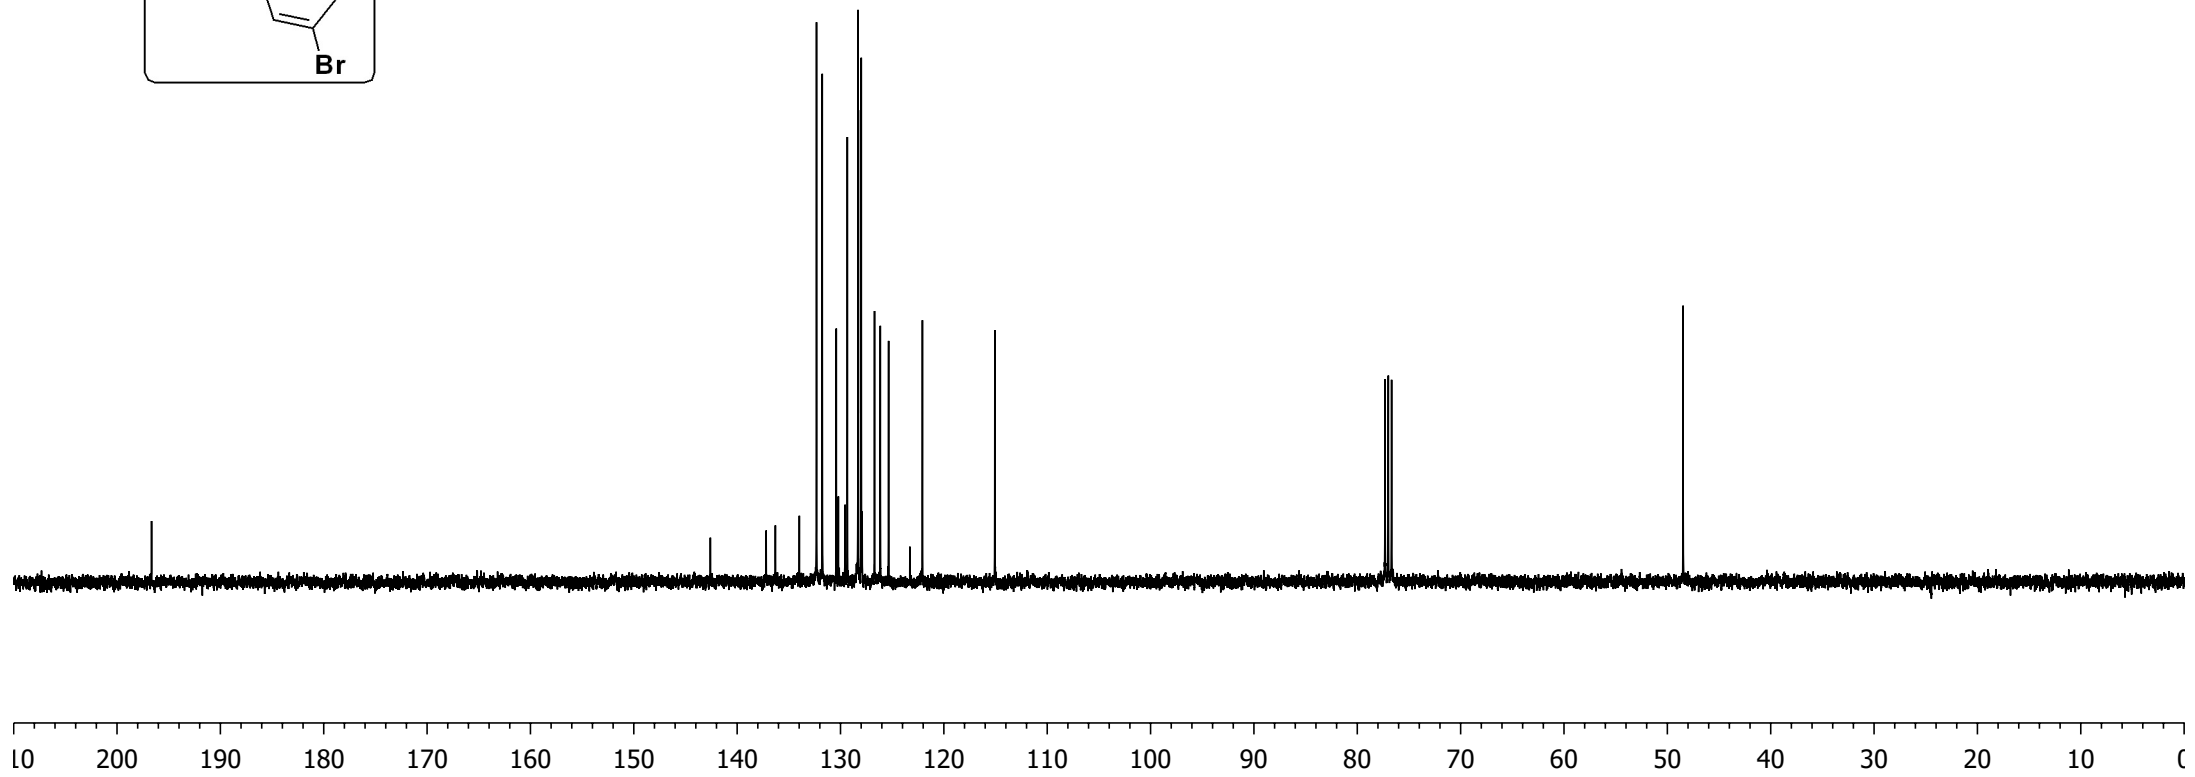

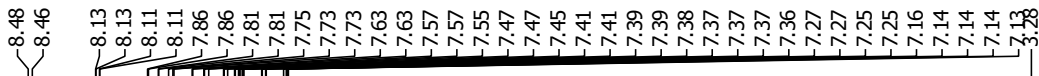

Solvent  $\text{CDCl}_3$   
Spectrometer Frequency 400.39  
Nucleus  $^1\text{H}$

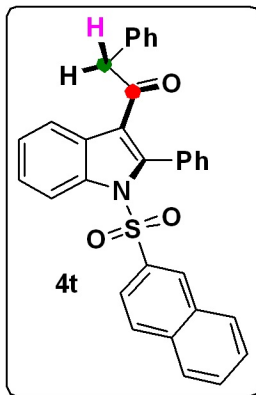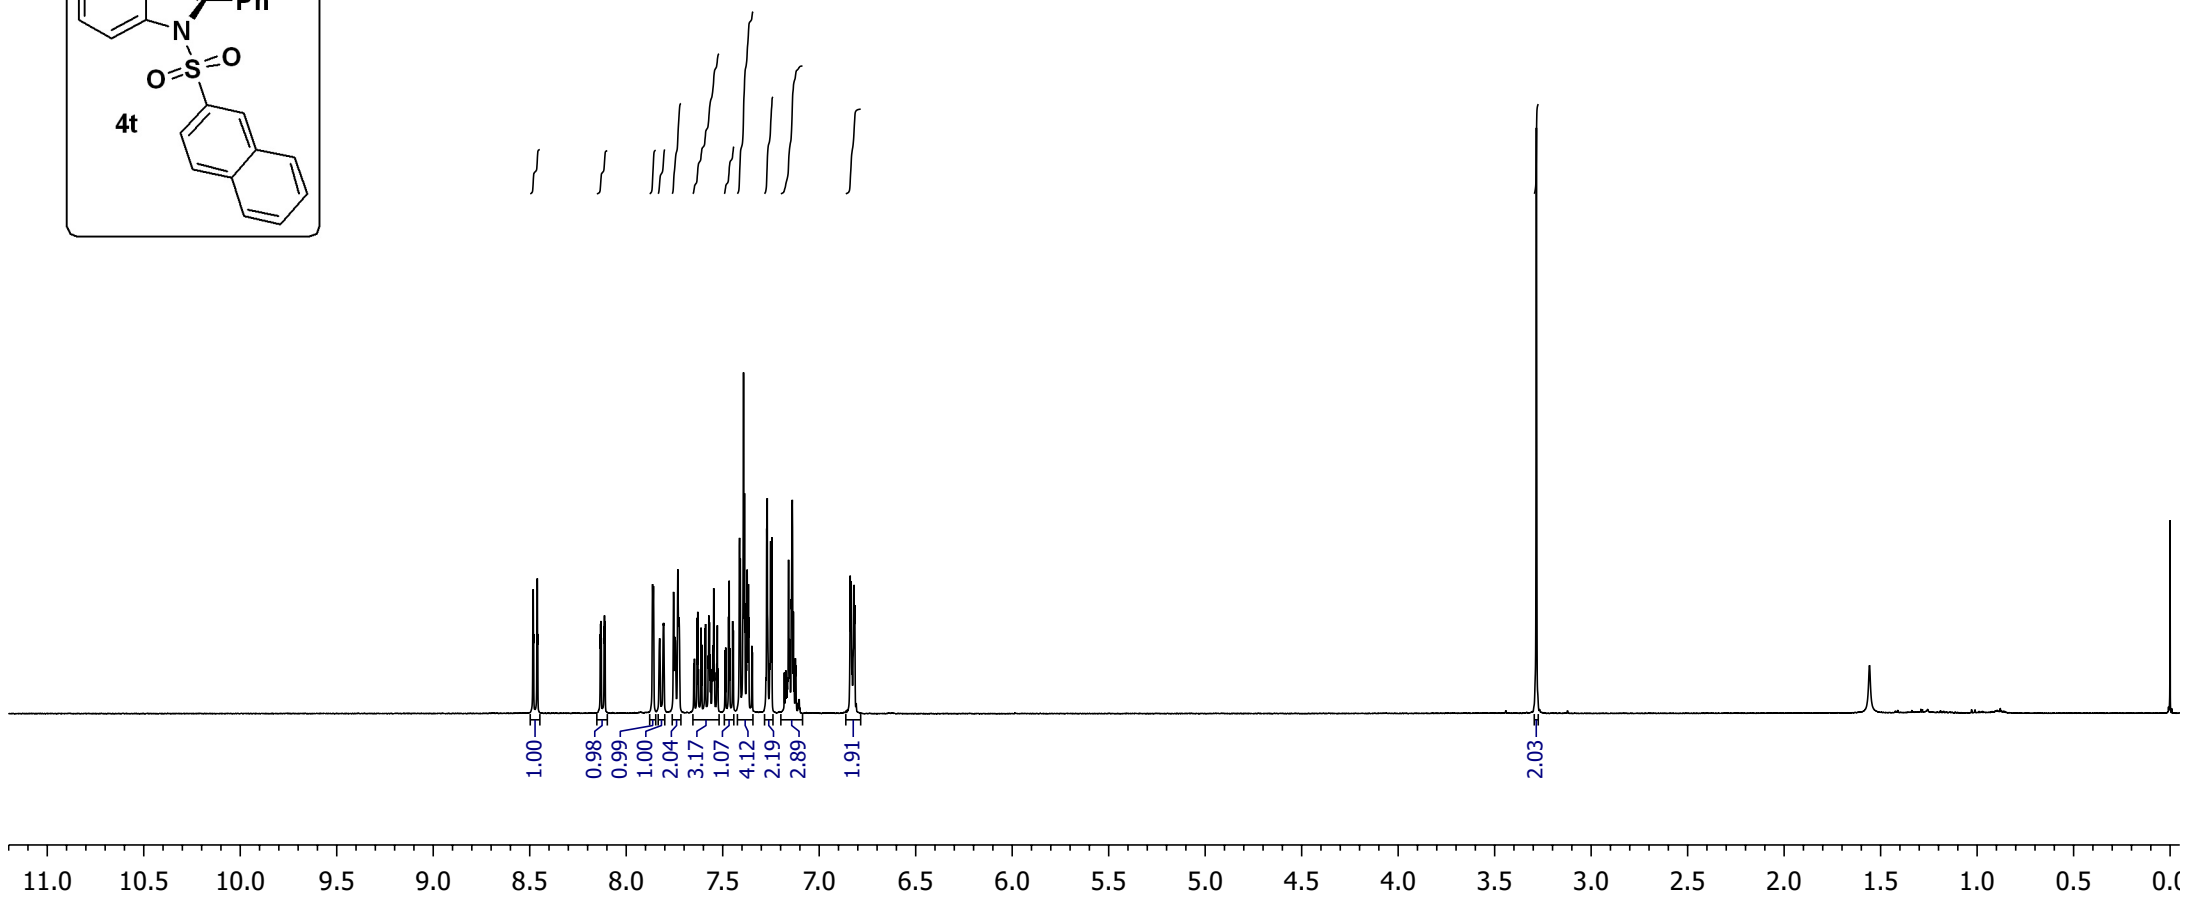

142.90  
131.91  
129.52  
129.44  
129.34  
129.27  
128.21  
127.82  
127.79  
126.62  
125.03

77.31  
76.99  
76.67

48.41

Solvent  $\text{CDCl}_3$   
Spectrometer Frequency 100.69  
Nucleus  $^{13}\text{C}$

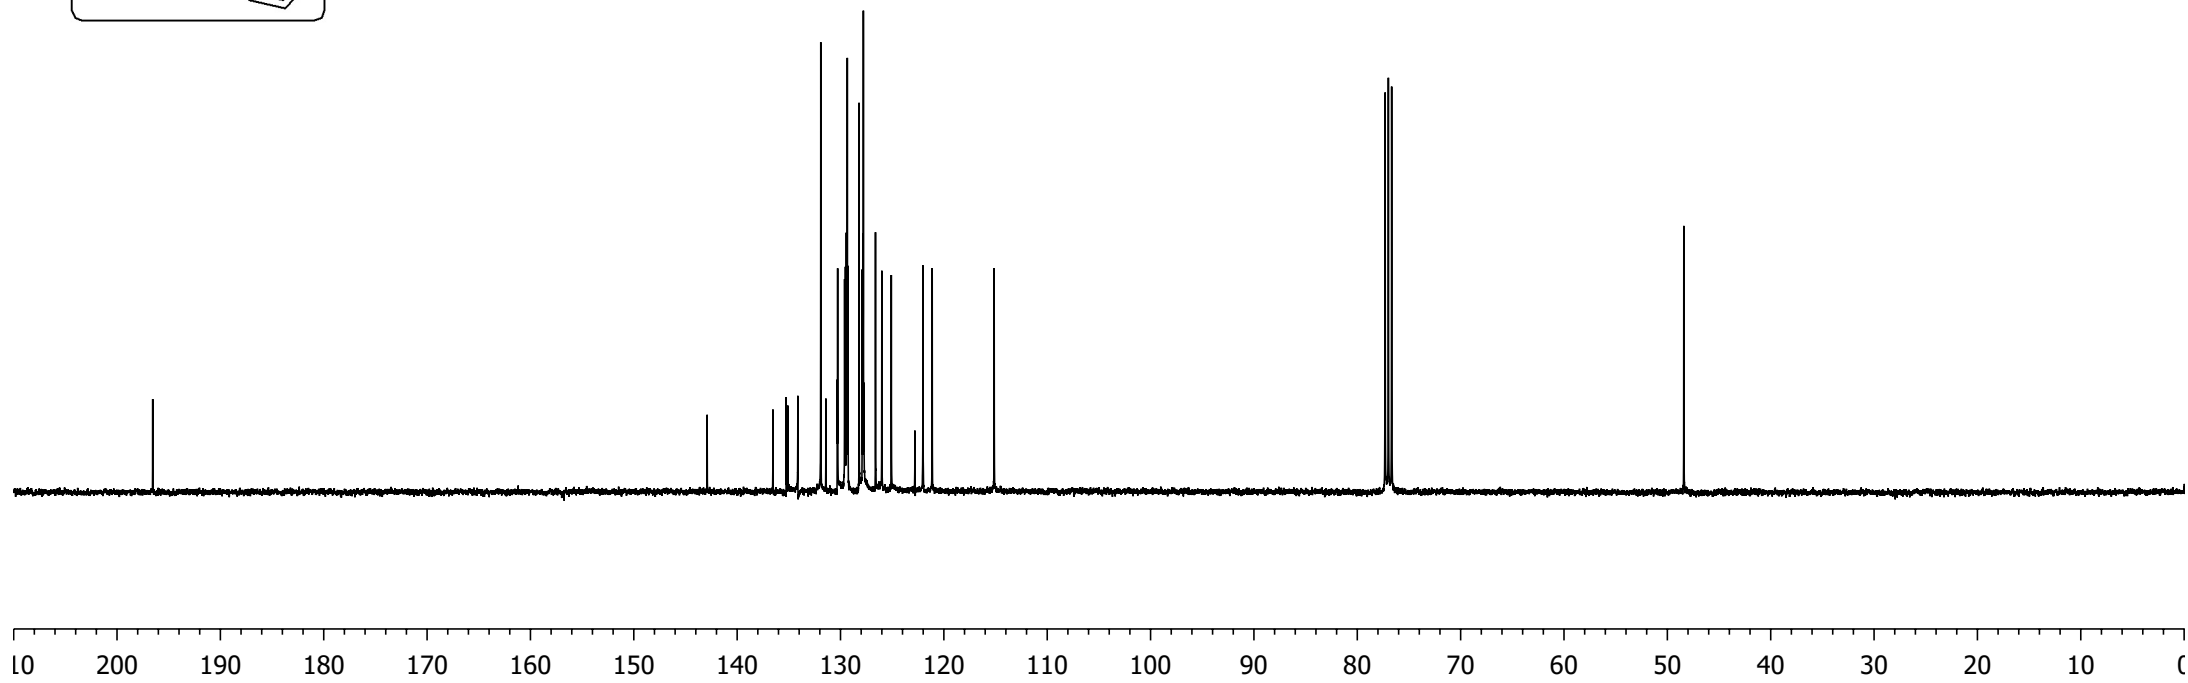

Solvent  $\text{CDCl}_3$   
Spectrometer Frequency 400.39  
Nucleus  $^1\text{H}$

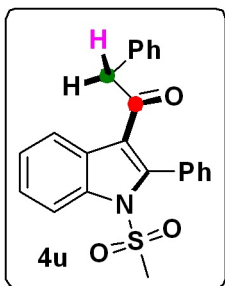

8.22 8.22 8.21 8.20 8.20 8.13 8.13 8.12 8.11 8.11 8.11 7.59 7.58 7.57 7.57 7.56 7.55 7.54 7.53 7.53 7.52 7.52 7.45 7.44 7.43 7.42 7.42 7.41 7.40 7.40 7.25 7.23 7.21 7.21 7.20 7.19 7.18 7.18 7.17 7.17 6.91 6.89 6.89 3.39

2.95

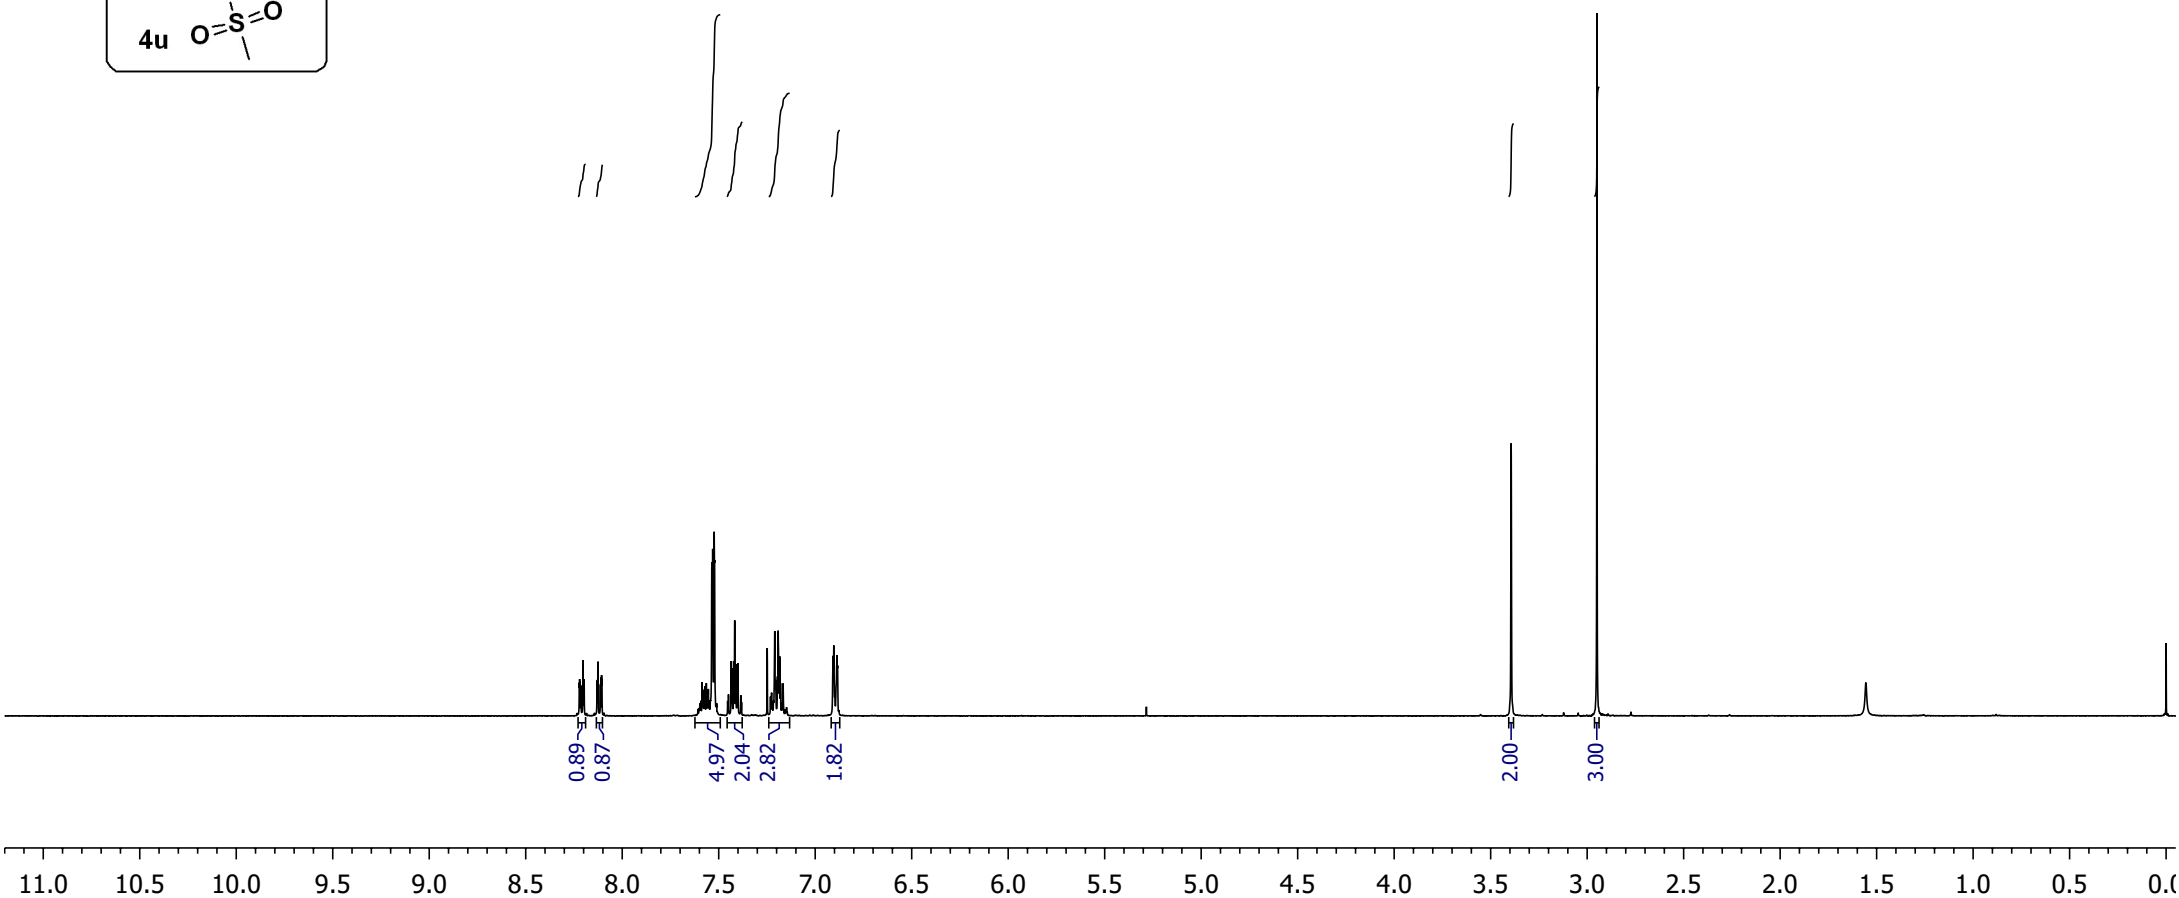

— 196.54

— 142.84

134.07

131.10

130.40

129.39

128.33

128.29

126.72

126.13

125.31

124.36

77.31

76.99

76.67

— 48.55

— 41.84

Solvent  $\text{CDCl}_3$   
Spectrometer Frequency 100.69  
Nucleus  $^{13}\text{C}$

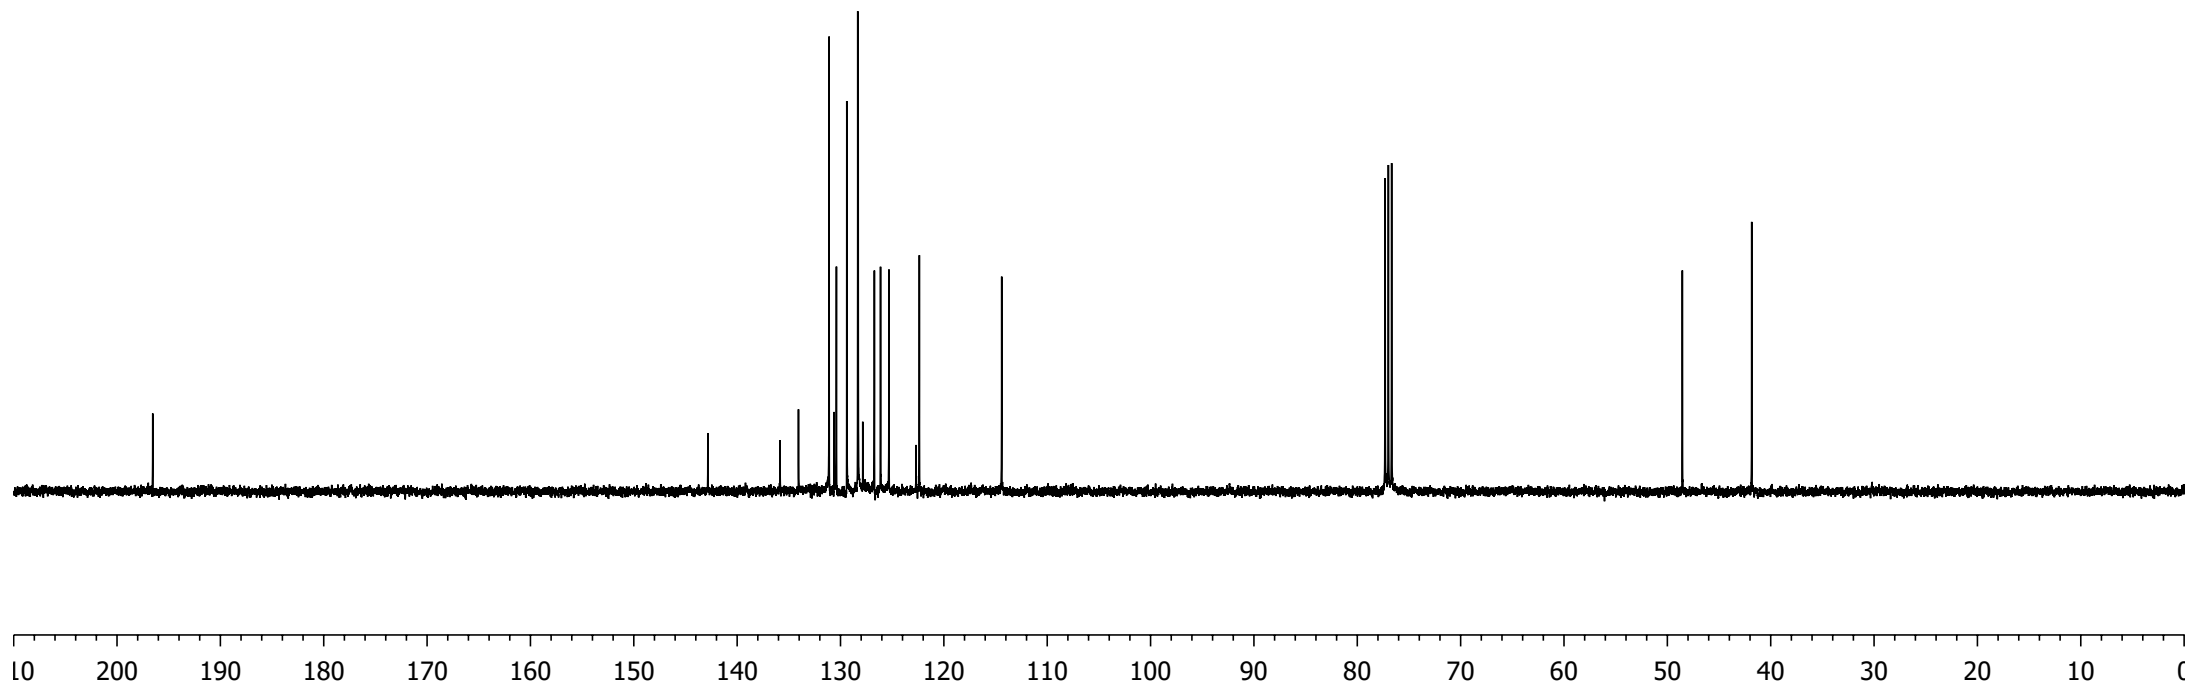

8.22  
8.21  
8.21  
8.20  
8.19  
8.12  
8.12  
8.11  
8.10  
8.10  
8.10  
8.09

7.58  
7.58  
7.57  
7.57  
7.56  
7.56  
7.54  
7.54  
7.53  
7.52  
7.52  
7.43  
7.42  
7.42  
7.41  
7.40  
7.40  
7.39  
7.39  
7.25  
7.23  
7.23  
7.21  
7.21  
7.20  
7.19  
7.18  
7.18  
7.17  
7.17  
6.91  
6.91  
5.88  
3.16  
3.14  
3.12  
3.10

1.14  
1.12  
1.10

Solvent  $\text{CDCl}_3$   
Spectrometer Frequency 400.28  
Nucleus  $^1\text{H}$

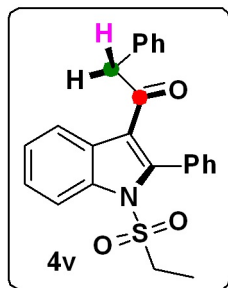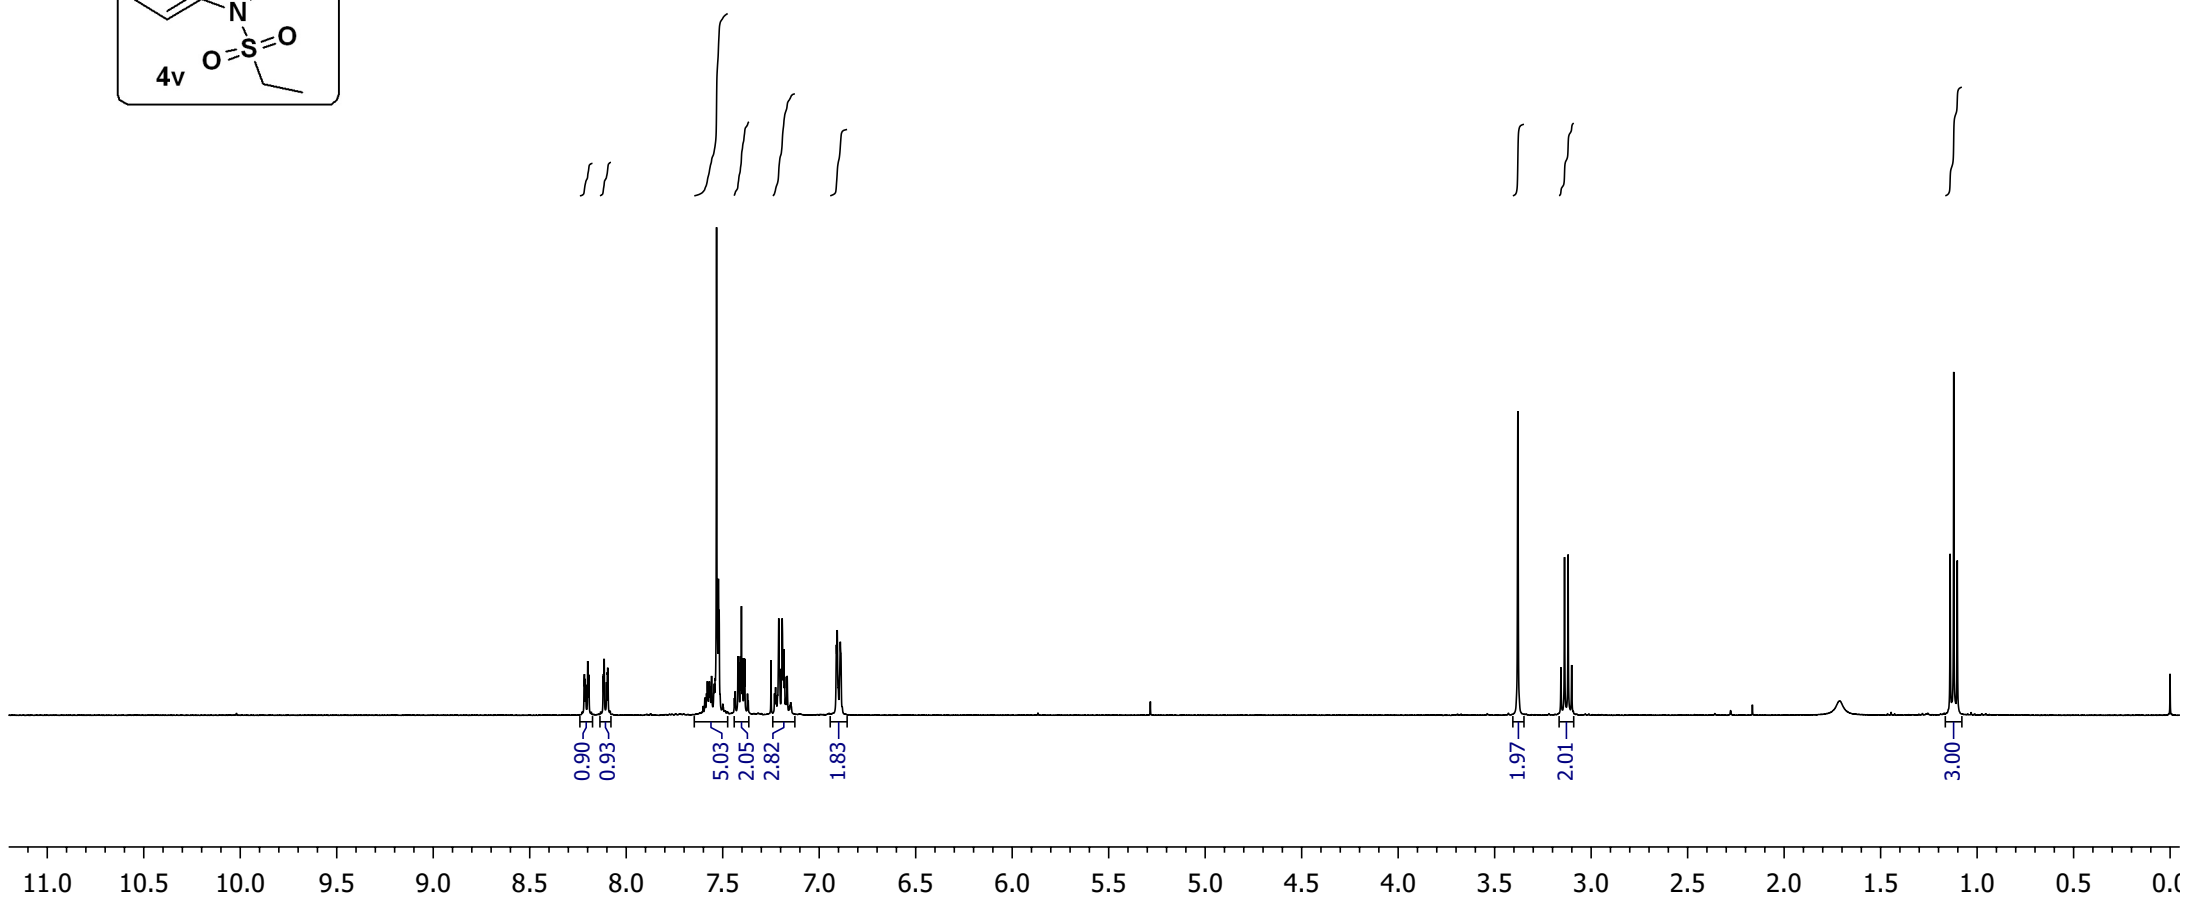



U0220-8  
MC-20-13

—196.64

—143.37

131.32  
130.33  
129.40  
128.27  
128.17  
126.70  
125.99  
125.12  
122.31  
114.34  
114.26  
114.25

77.31  
76.99  
76.68

49.52  
48.53

—7.60

S89

Solvent  $\text{CDCl}_3$   
Spectrometer Frequency 100.66  
Nucleus  $^{13}\text{C}$

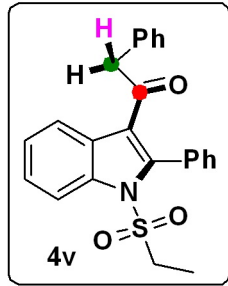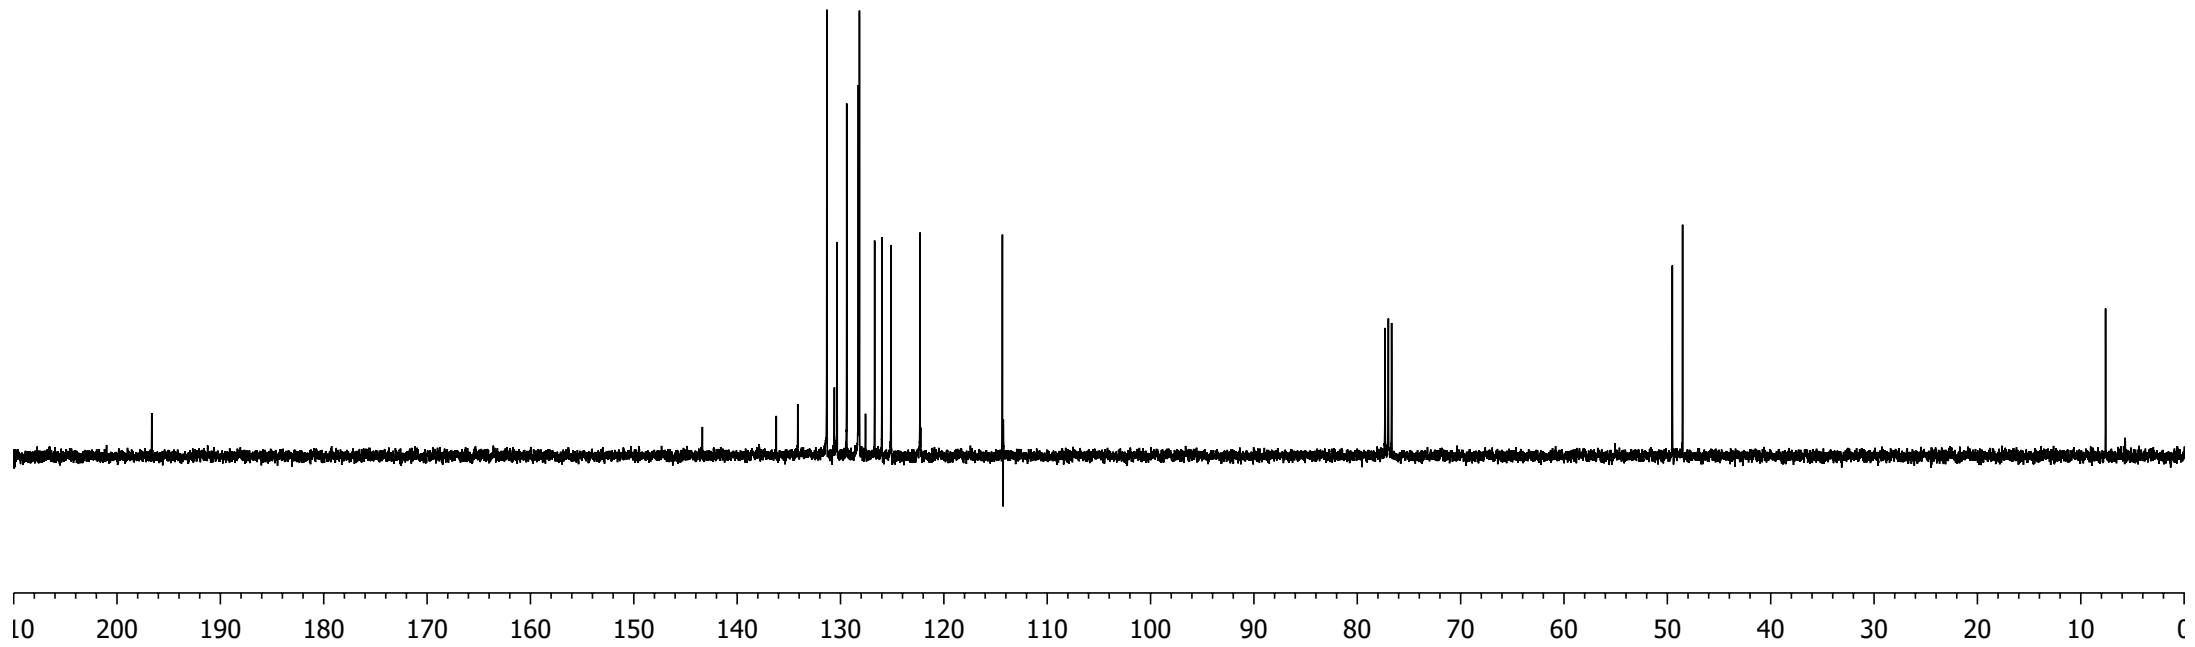

11.0 10.5 10.0 9.5 9.0 8.5 8.0 7.5 7.0 6.5 6.0 5.5 5.0 4.5 4.0 3.5 3.0 2.5 2.0 1.5 1.0 0.5 0.0

Solvent CDCl<sub>3</sub>  
Spectrometer Frequency 400.39  
Nucleus <sup>1</sup>H

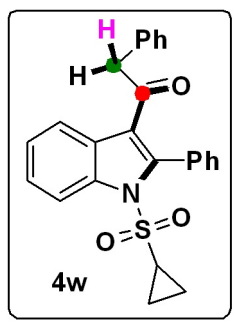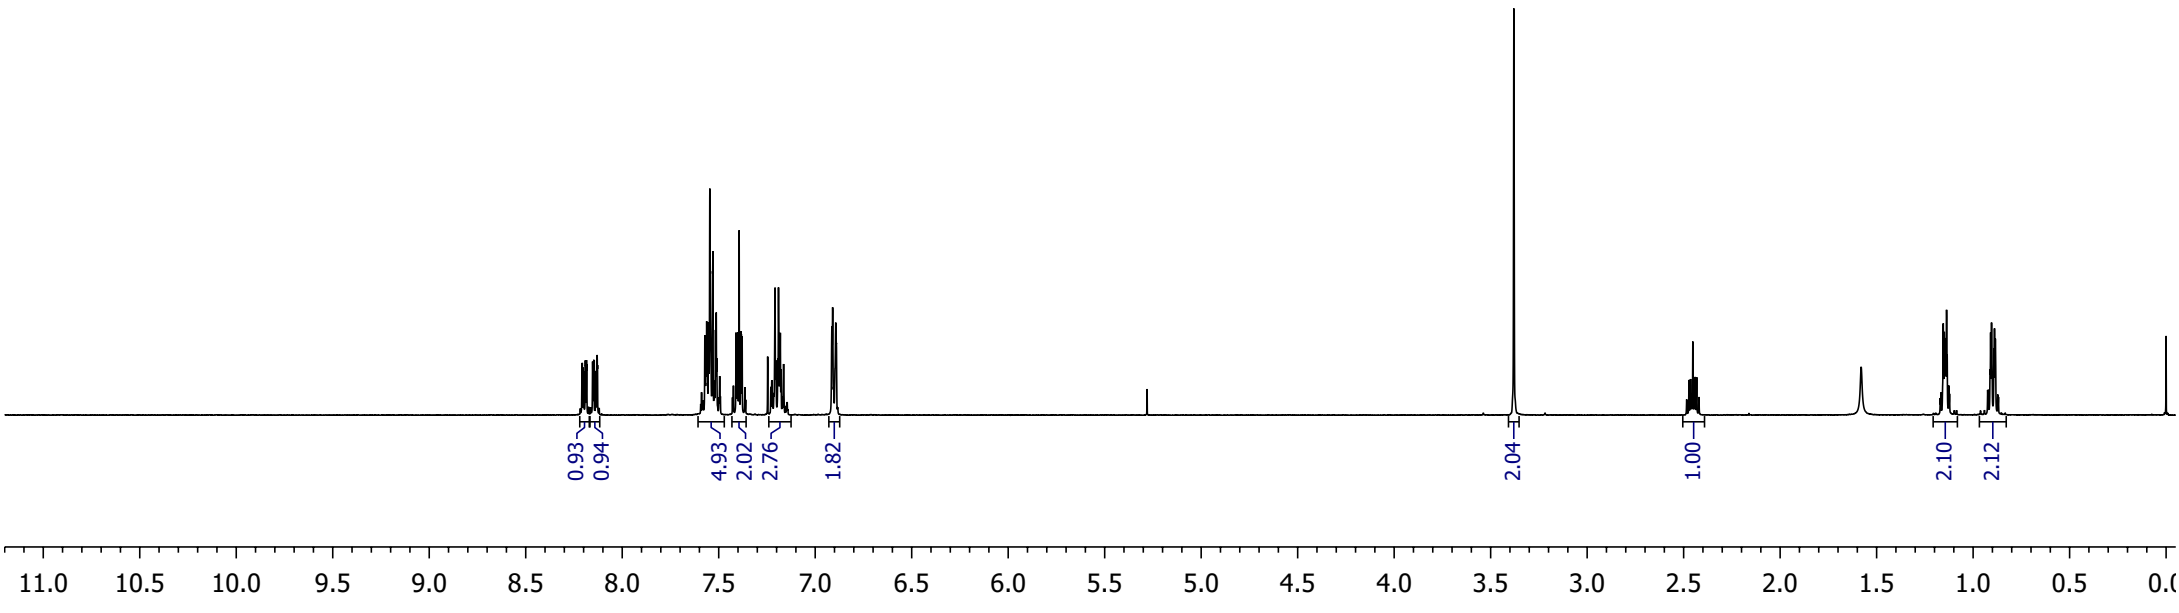

11.0 10.5 10.0 9.5 9.0 8.5 8.0 7.5 7.0 6.5 6.0 5.5 5.0 4.5 4.0 3.5 3.0 2.5 2.0 1.5 1.0 0.5 0.0

M0461-10  
MC-20-20

196.74

142.97

131.48

130.82

130.28

129.39

128.26

128.05

126.67

125.85

125.03

122.12

114.52

77.31

76.99

76.67

48.51

32.14

6.11

S91

Solvent  $\text{CDCl}_3$   
Spectrometer Frequency 100.69  
Nucleus  $^{13}\text{C}$

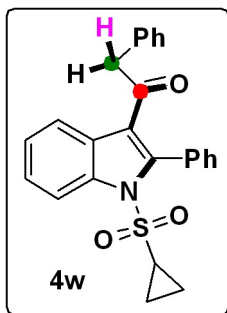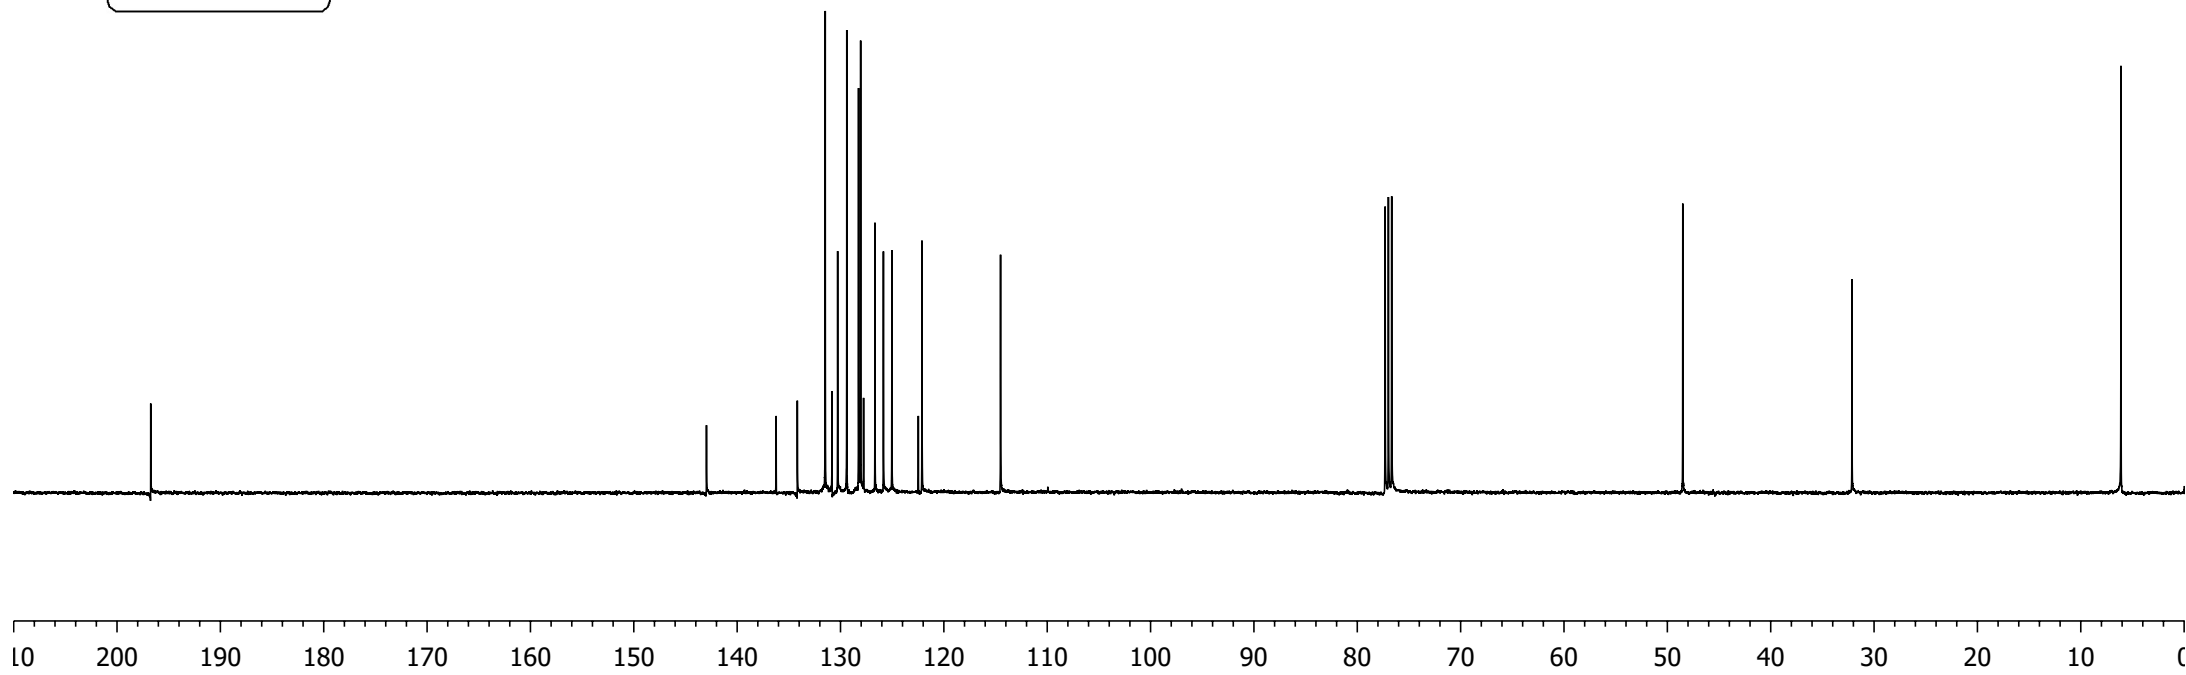

Solvent  $\text{CDCl}_3$   
Spectrometer Frequency 400.28  
Nucleus  $^1\text{H}$

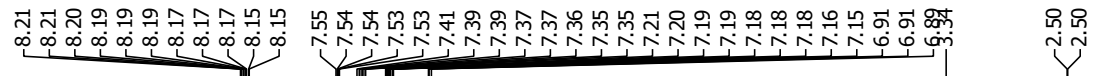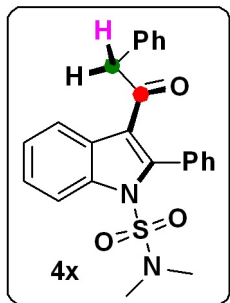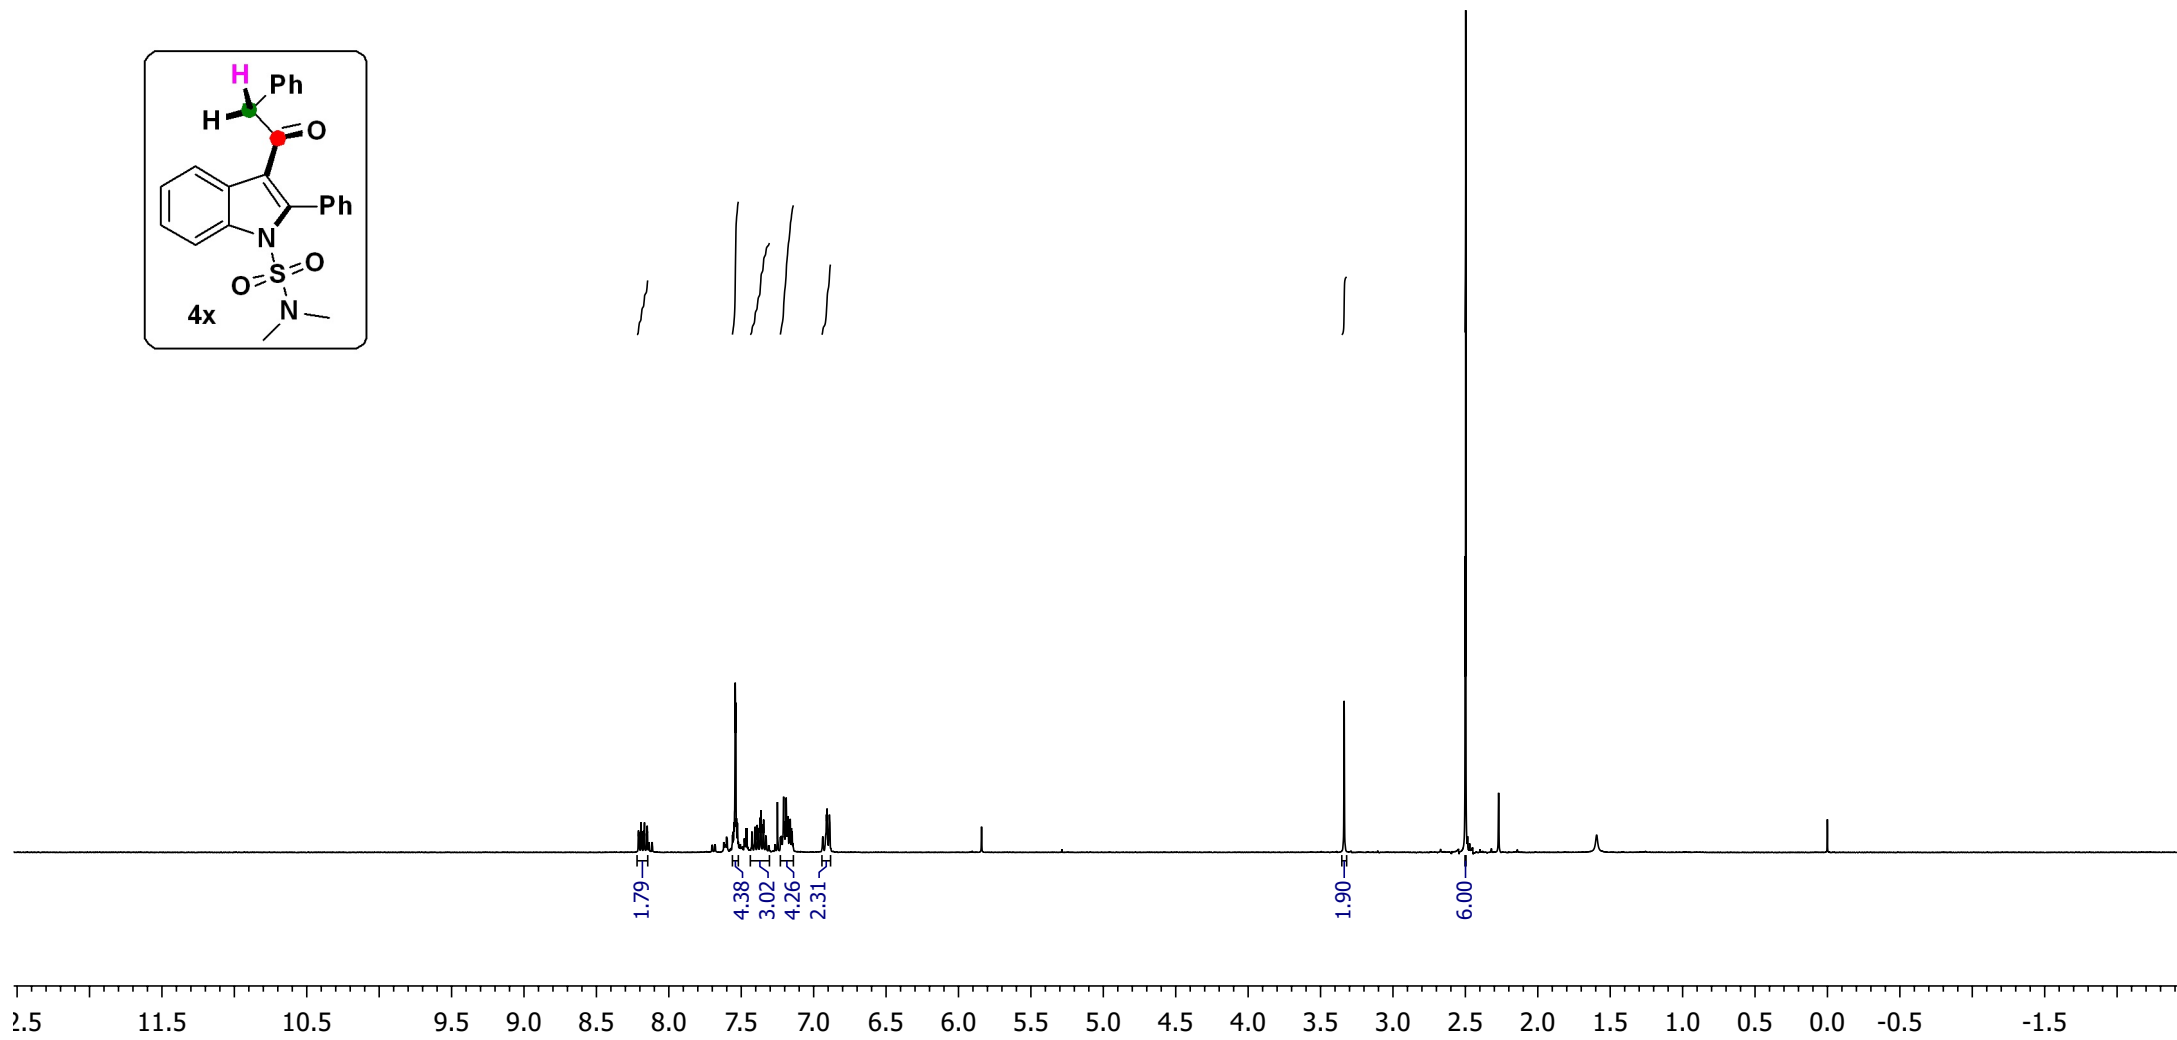

U0220-12  
MC-20-15

—196.69

131.41  
131.36  
130.14  
129.41  
128.99  
128.96  
128.24  
128.13  
127.95  
127.75  
126.63  
125.54  
124.51  
121.88  
—114.91

77.32  
77.00  
76.68

—48.46

—37.40

S93

Solvent  $\text{CDCl}_3$   
Spectrometer Frequency 100.66  
Nucleus  $^{13}\text{C}$

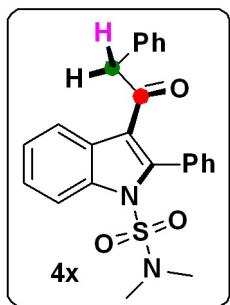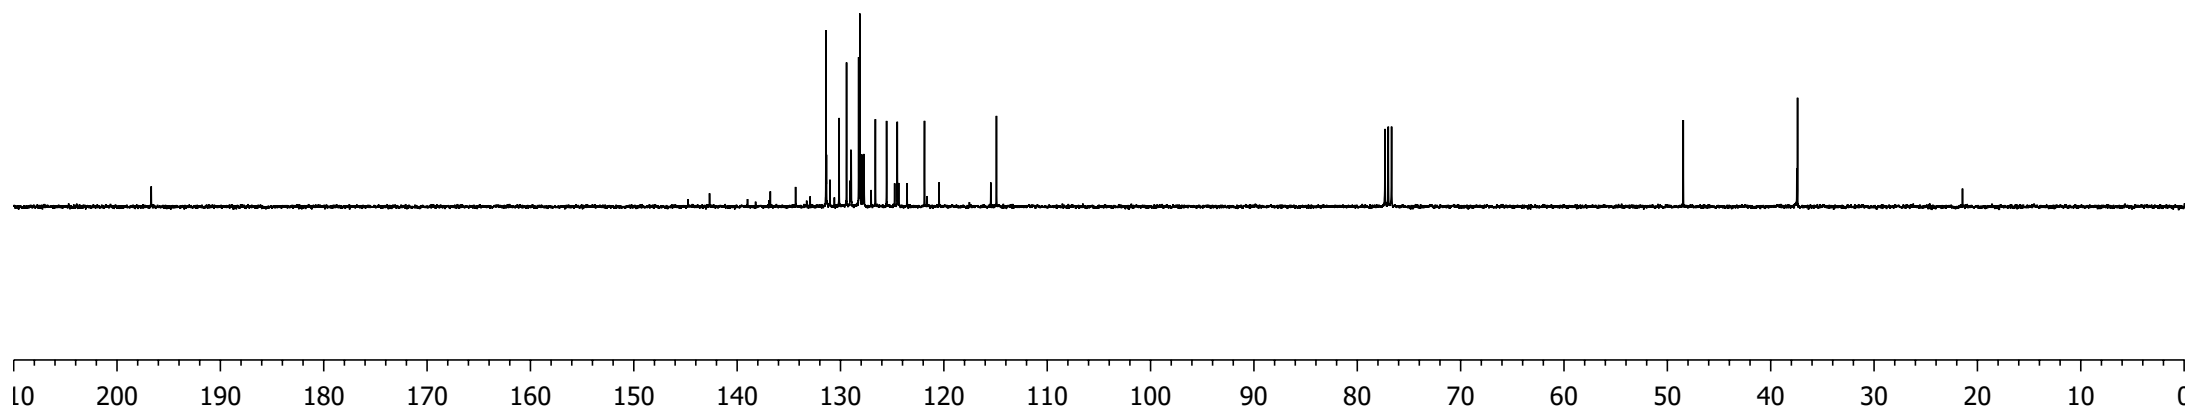

Solvent  $\text{CDCl}_3$   
Spectrometer Frequency 400.28  
Nucleus  $^1\text{H}$

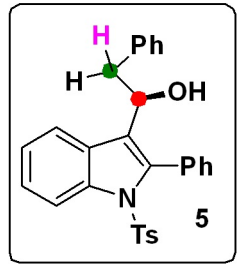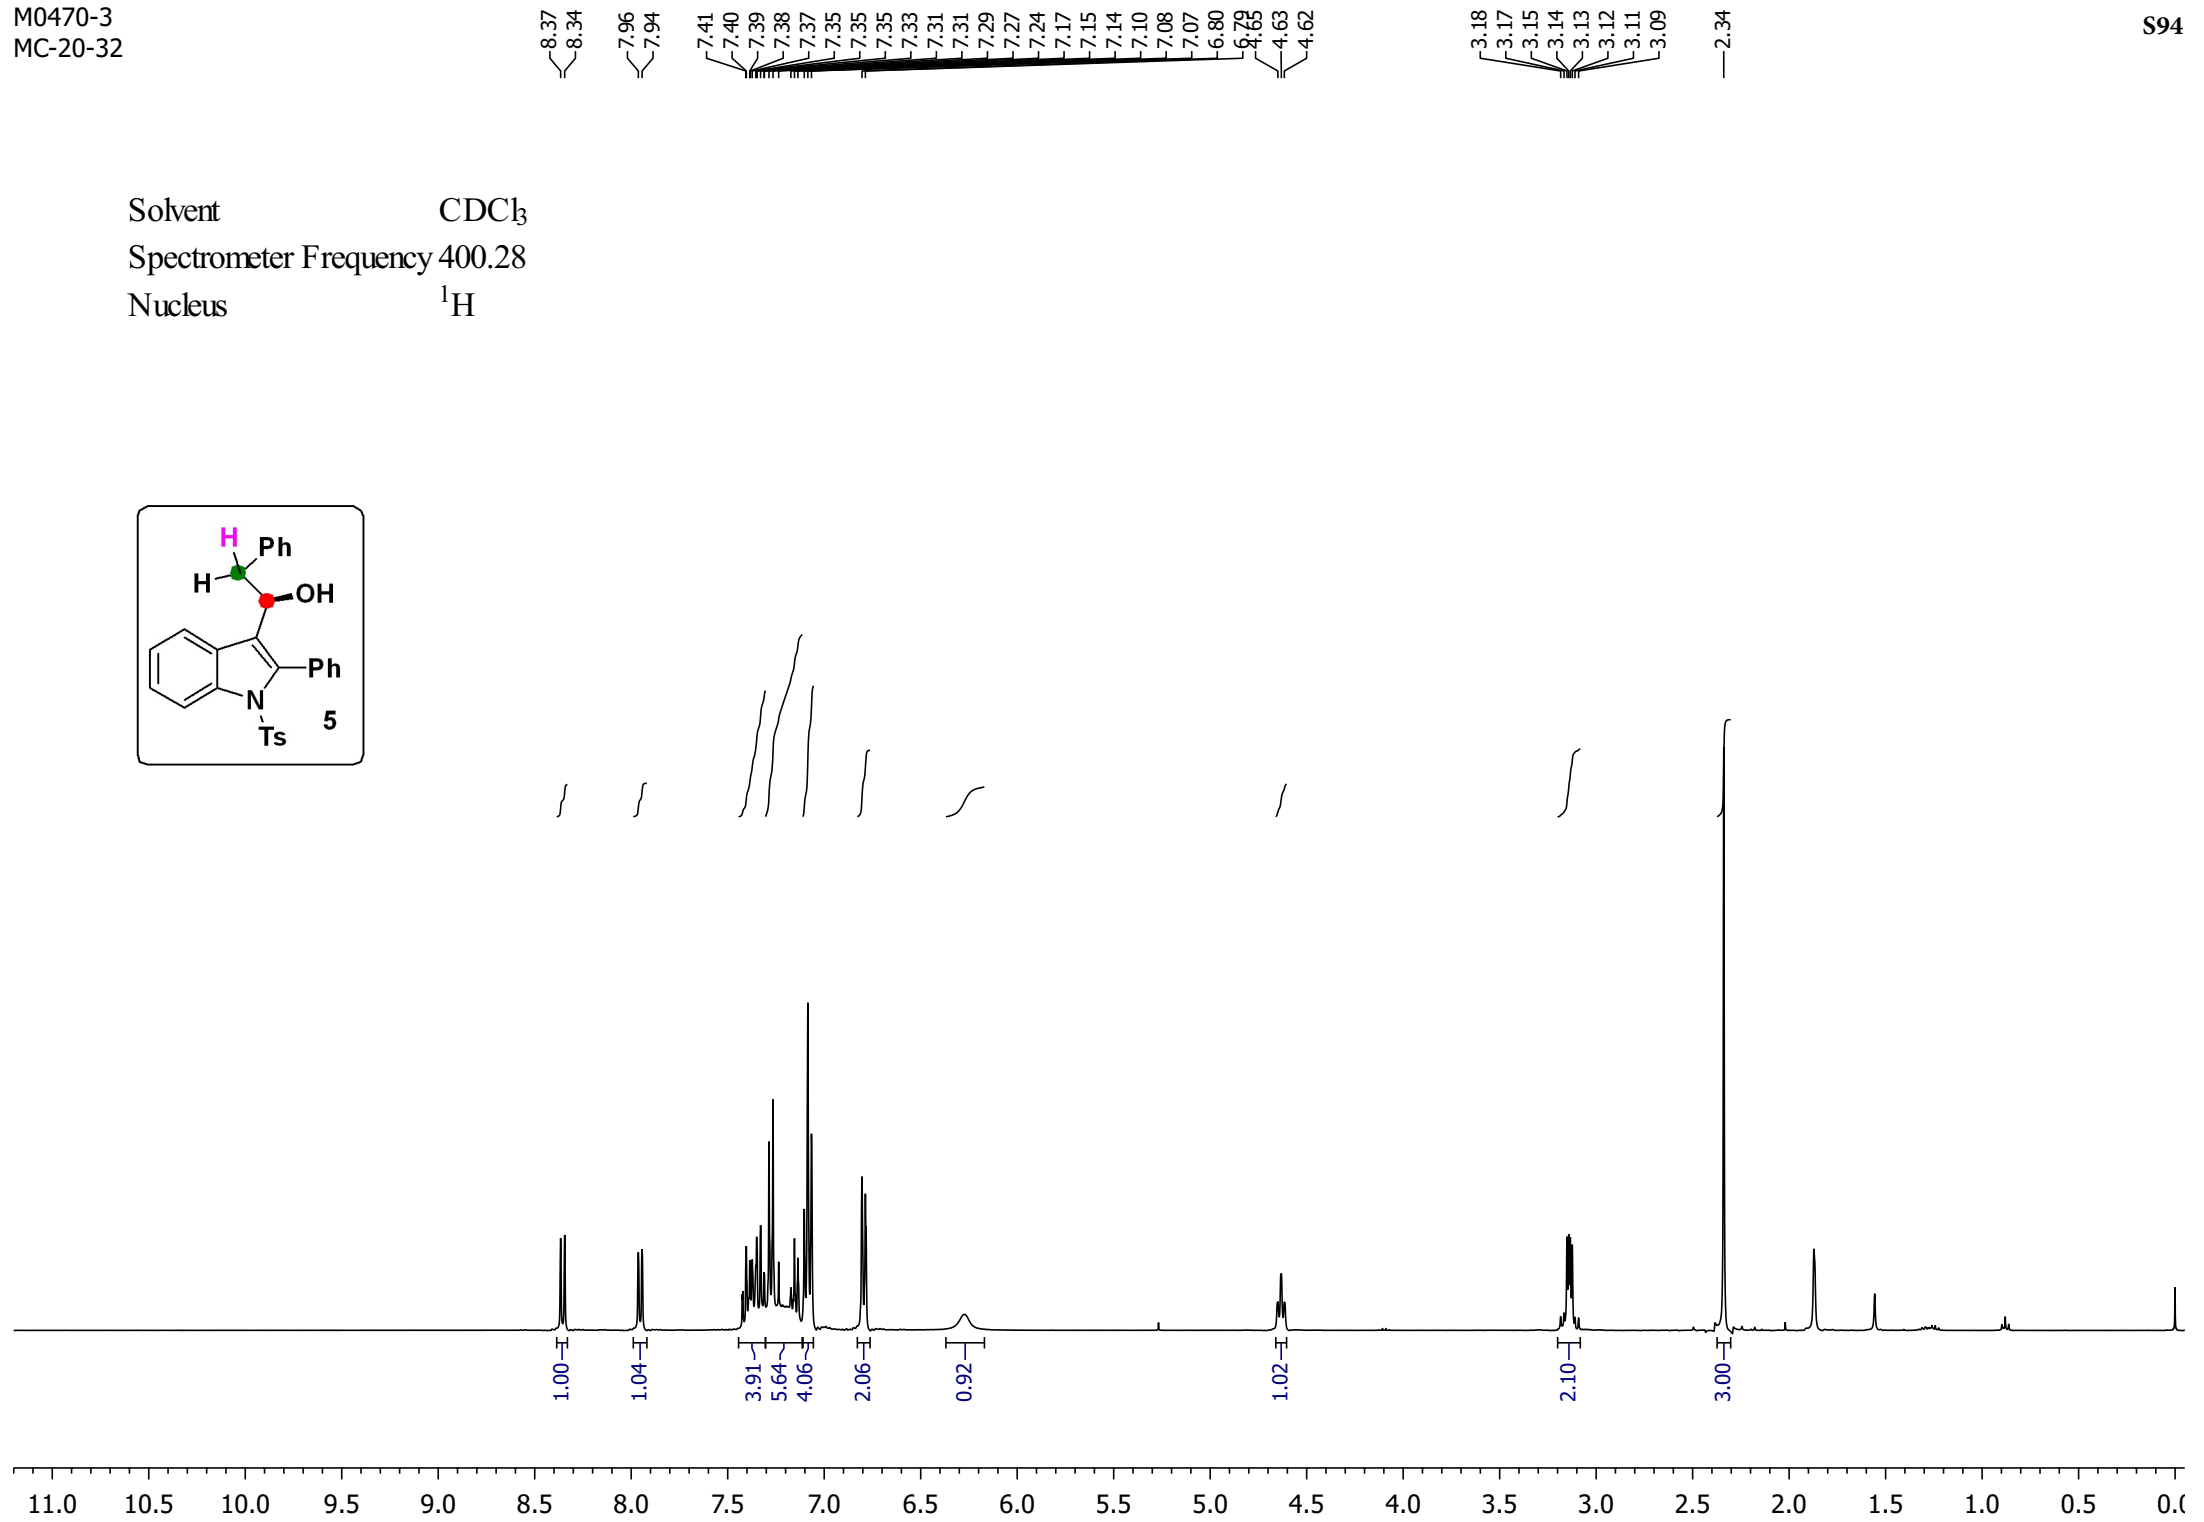

— 144.52  
129.41  
129.35  
128.74  
128.29  
127.16  
126.76  
126.33  
124.93  
123.75  
121.28

77.32  
77.00  
76.68  
— 69.71

— 43.29

— 21.54

Solvent CDCl<sub>3</sub>  
Spectrometer Frequency 100.66  
Nucleus <sup>13</sup>C

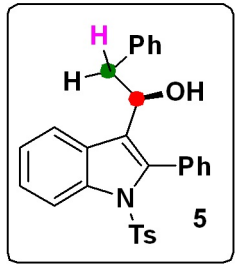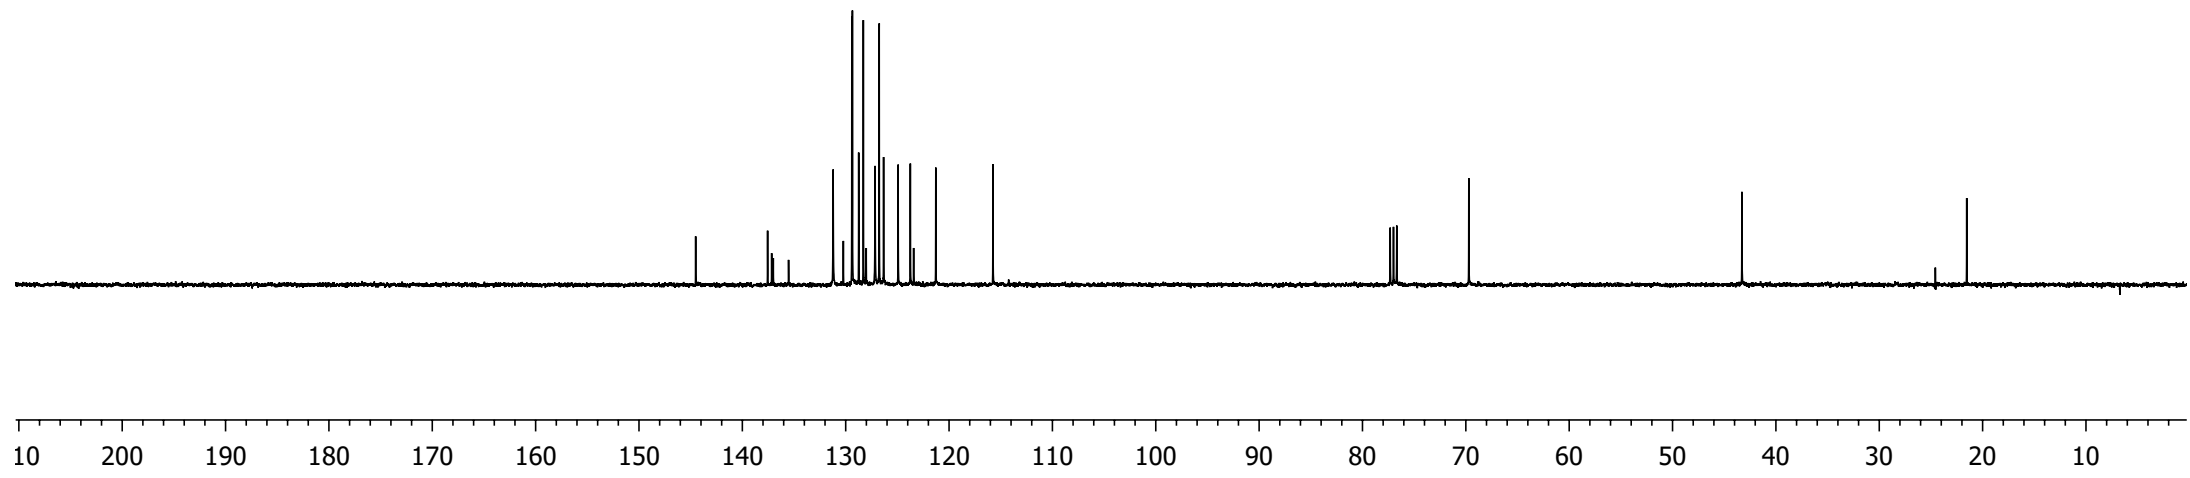

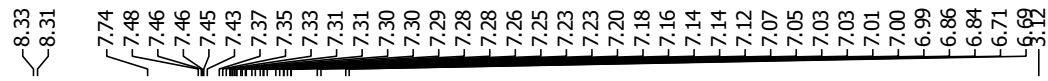

Solvent  $\text{CDCl}_3$   
Spectrometer Frequency 400.39  
Nucleus  $^1\text{H}$

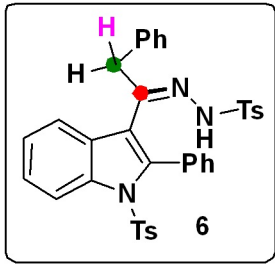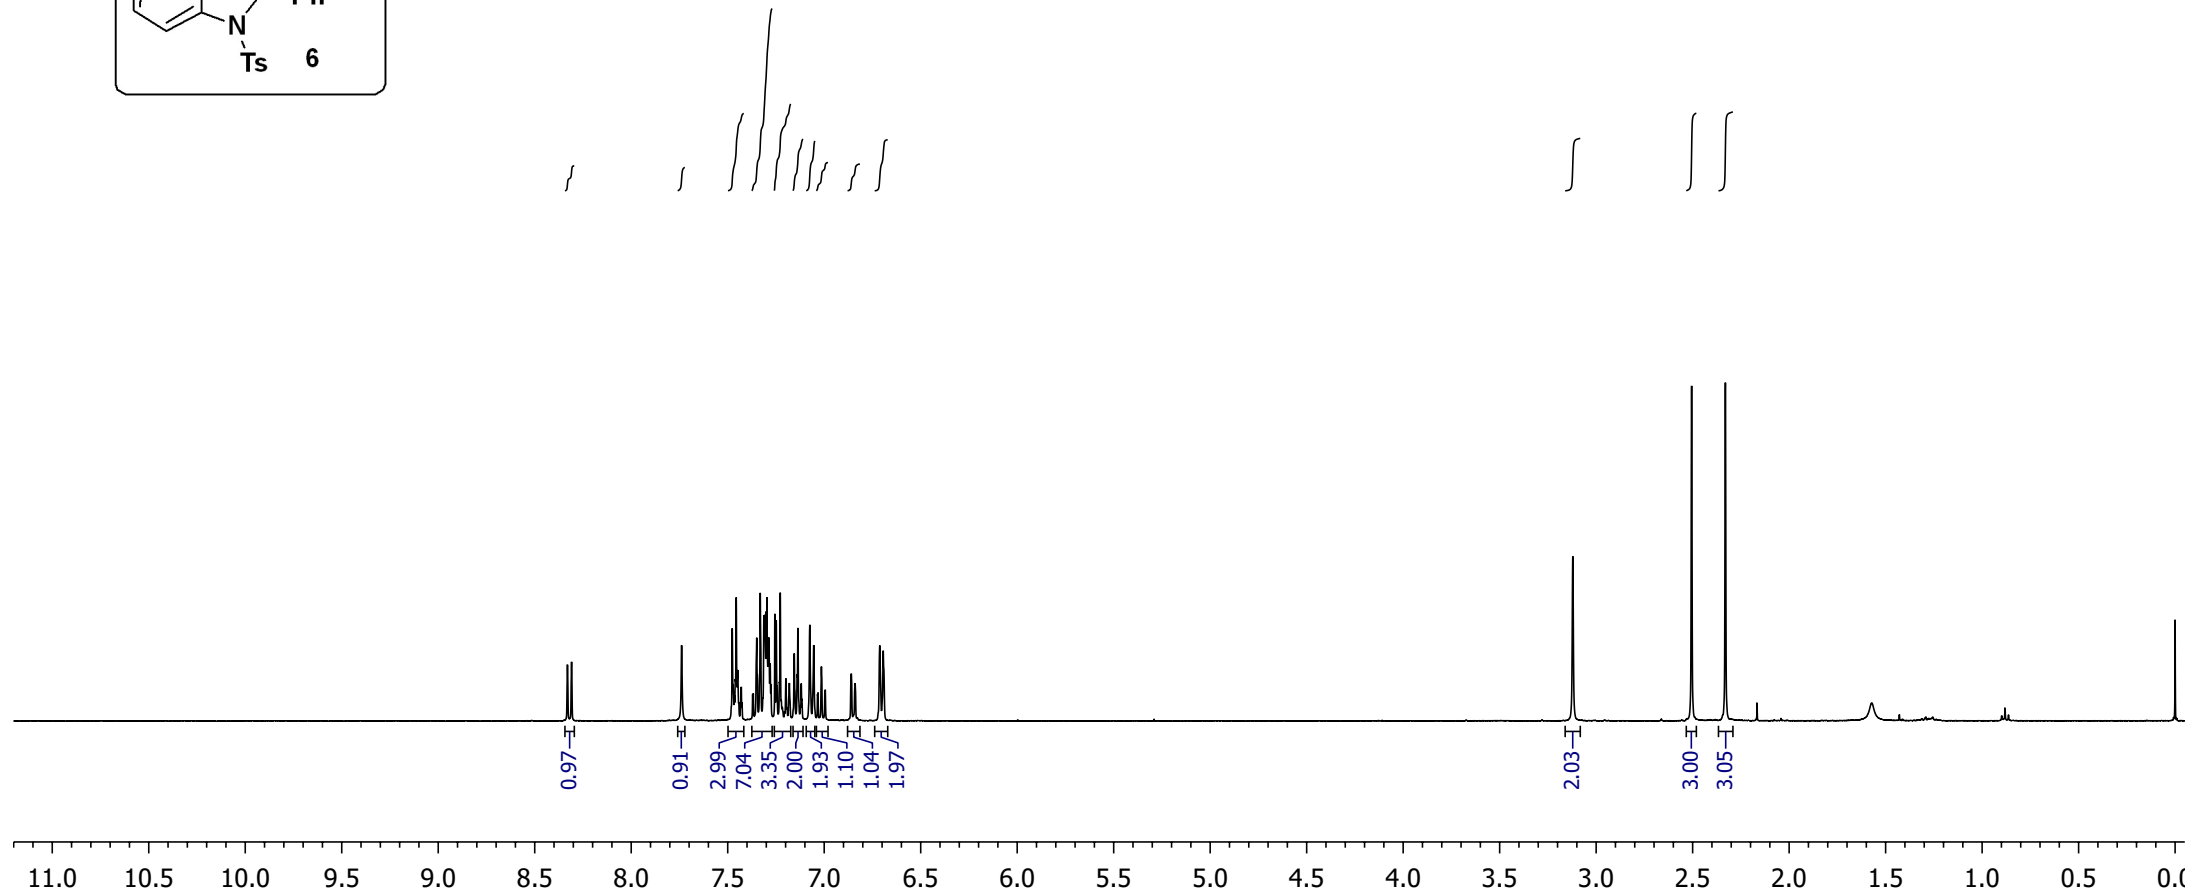



150.71  
133.82  
131.88  
129.69  
129.54  
129.36  
128.26  
127.67  
127.60  
127.38  
126.86  
125.35  
124.06  
115.45

77.31  
76.99  
76.67

35.73

21.69  
21.55

Solvent  $\text{CDCl}_3$   
Spectrometer Frequency 100.69  
Nucleus  $^{13}\text{C}$

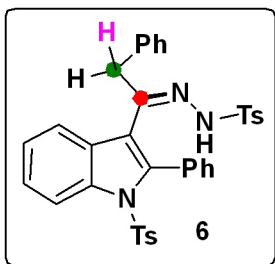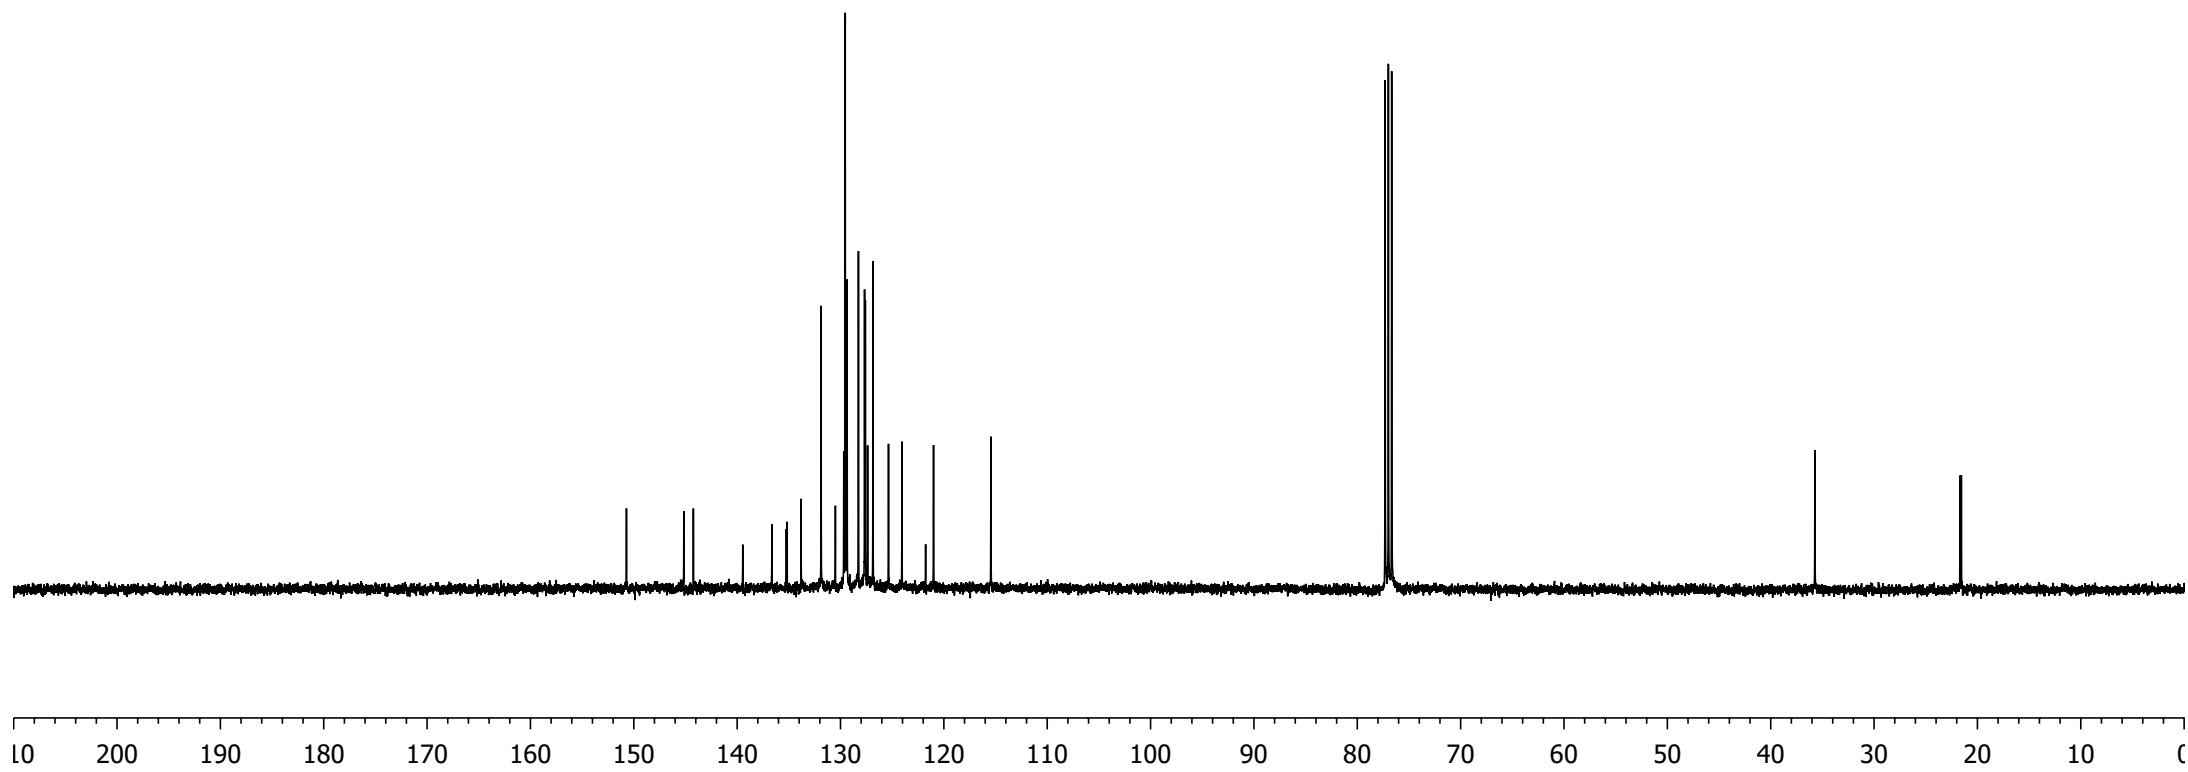

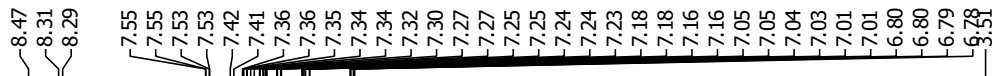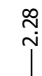

Solvent  $\text{CDCl}_3$   
Spectrometer Frequency 400.39  
Nucleus  $^1\text{H}$

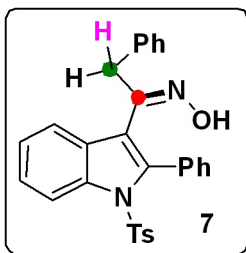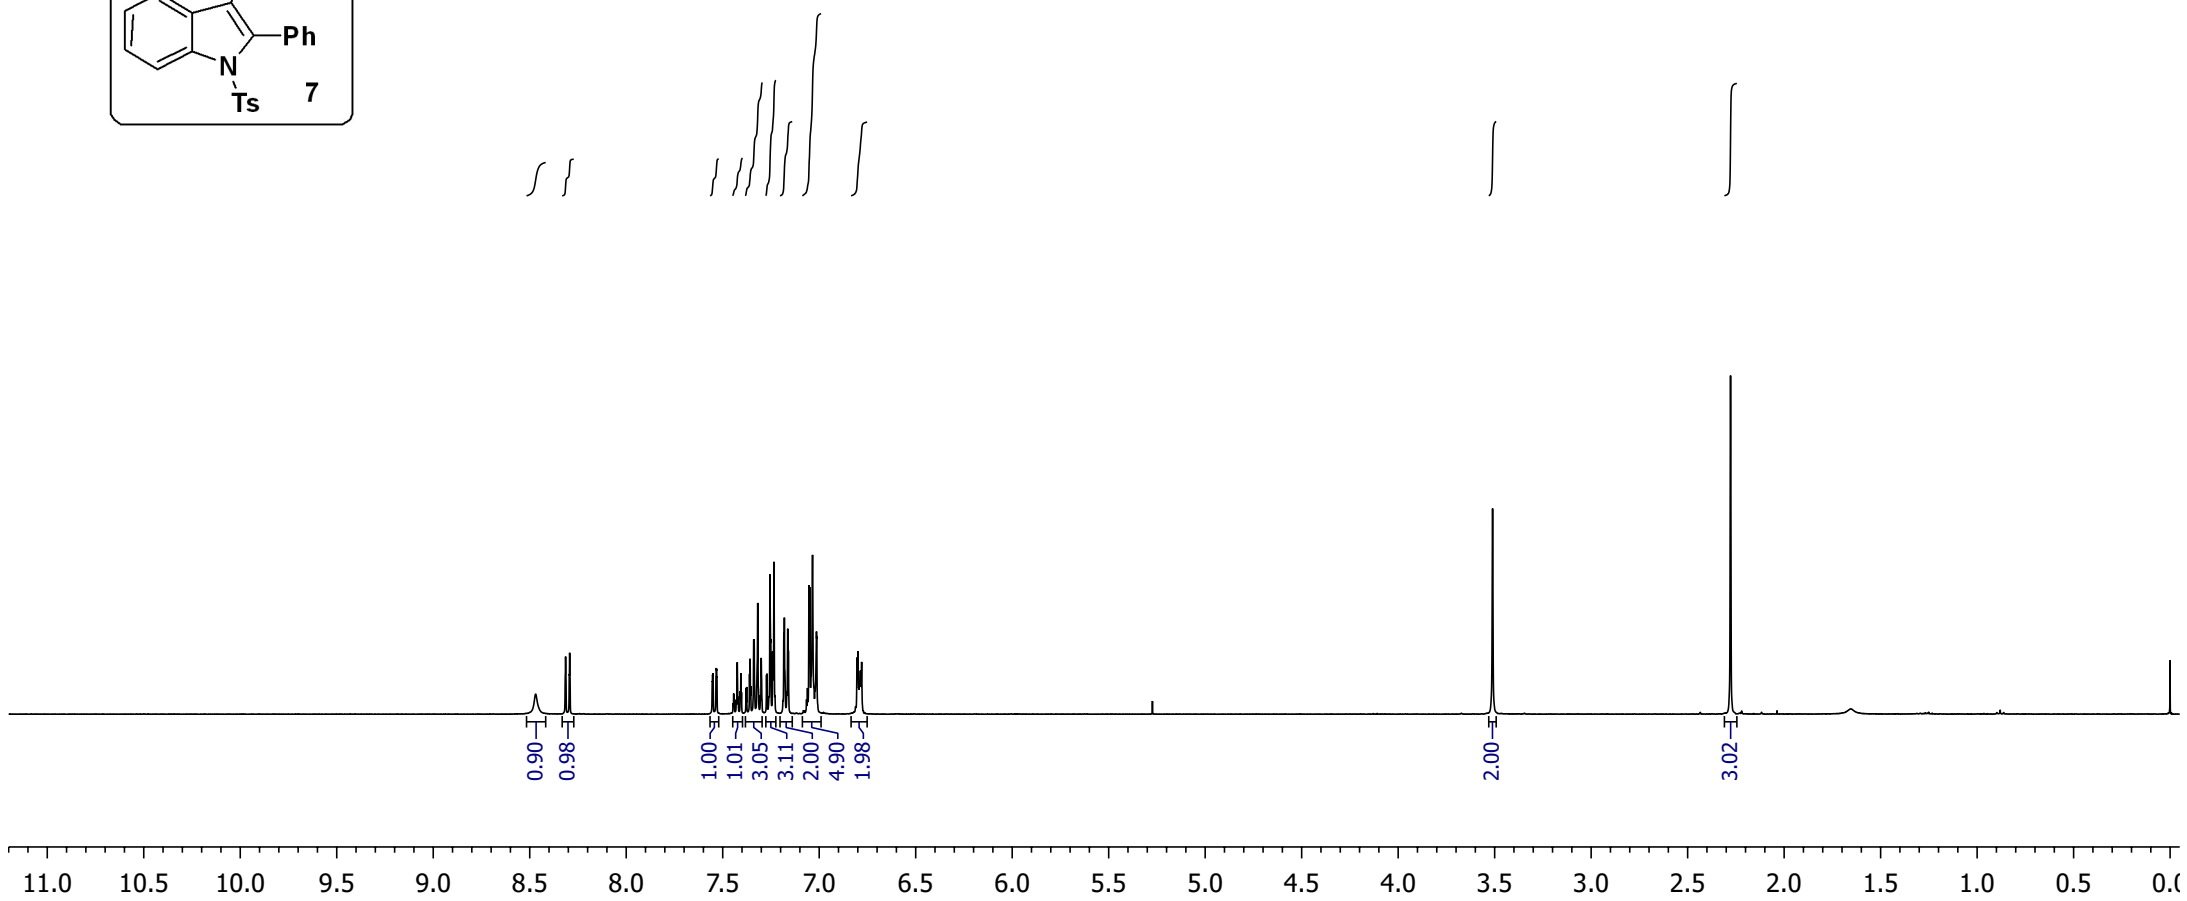

Solvent  $\text{CDCl}_3$   
Spectrometer Frequency 100.69  
Nucleus  $^{13}\text{C}$

153.63  
144.75  
139.04  
136.75  
135.76  
135.13  
131.62  
130.49  
129.36  
129.14  
128.71  
128.15  
127.30  
126.78  
126.17  
125.27  
124.36  
120.28  
119.44  
115.80

77.31  
76.99  
76.67

33.28

21.51

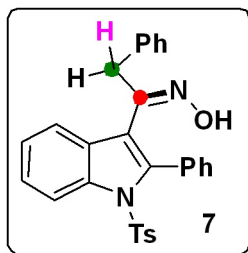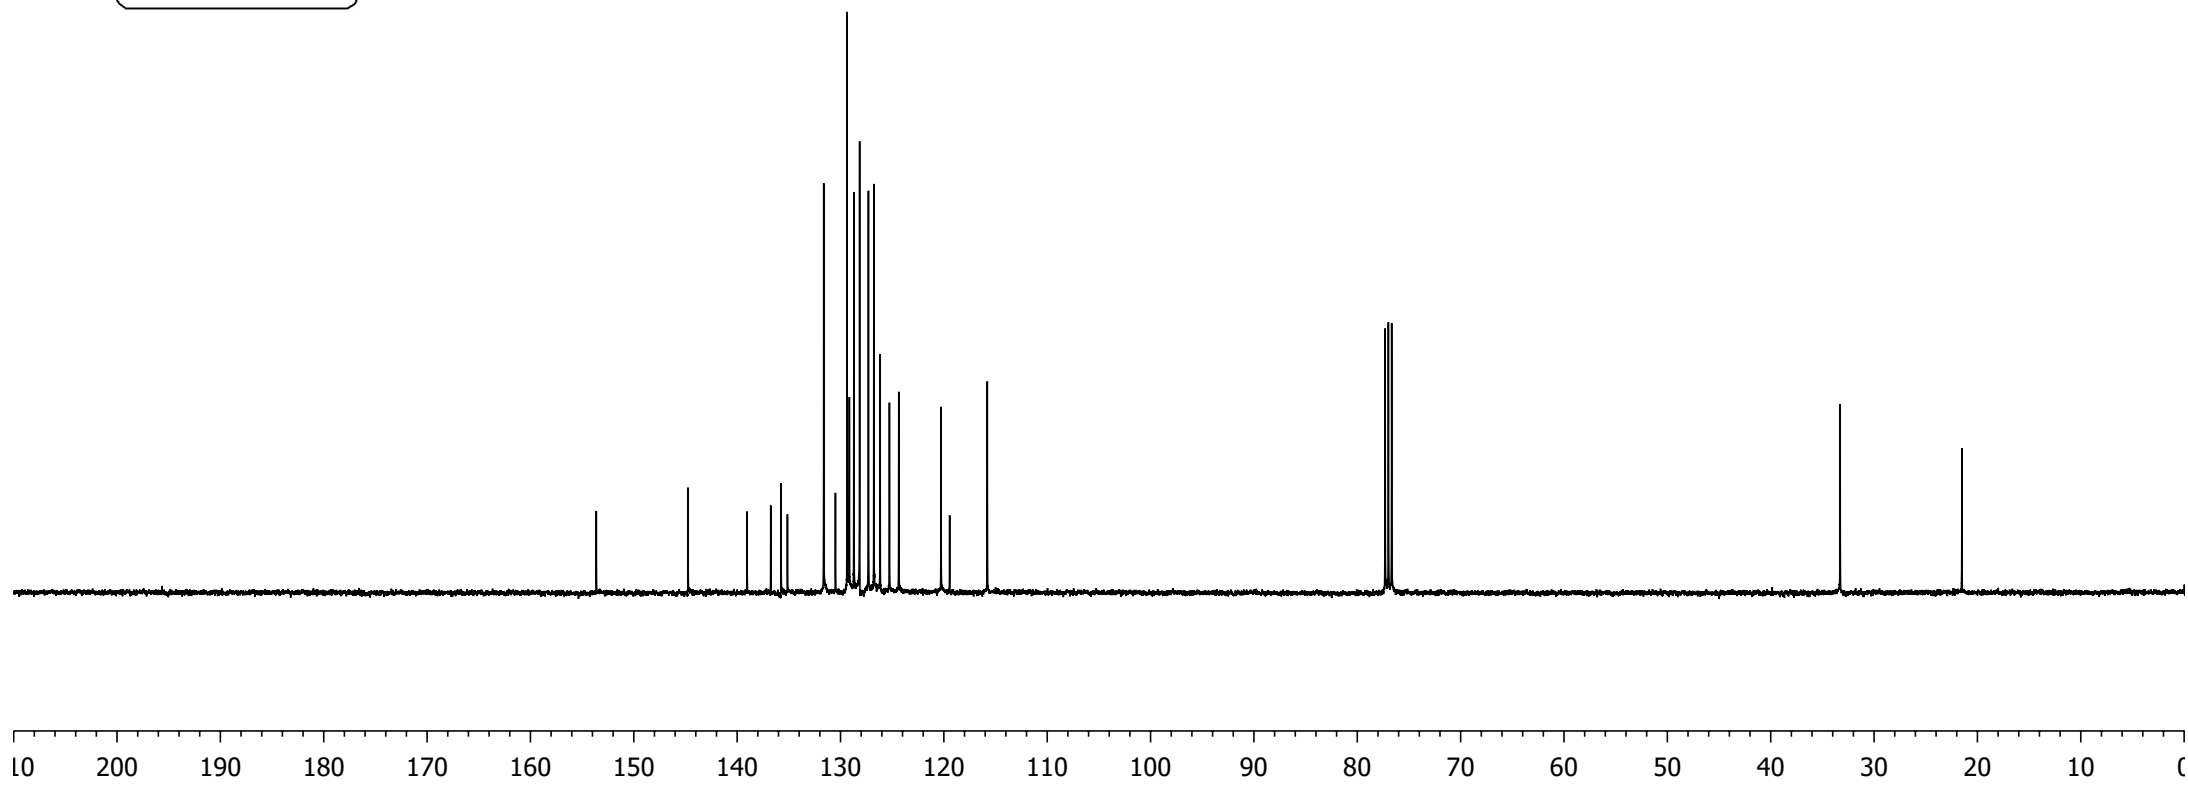

Solvent DMSO-d<sub>6</sub>  
Spectrometer Frequency 400.28  
Nucleus <sup>1</sup>H

8.17  
8.16  
7.69  
7.67  
7.67  
7.67  
7.66  
7.64  
7.54  
7.52  
7.50  
7.48  
7.46  
7.38  
7.37  
7.35  
7.35  
7.34  
7.34  
7.32  
7.32  
7.30  
7.28  
7.23  
7.21  
7.19

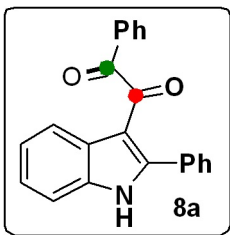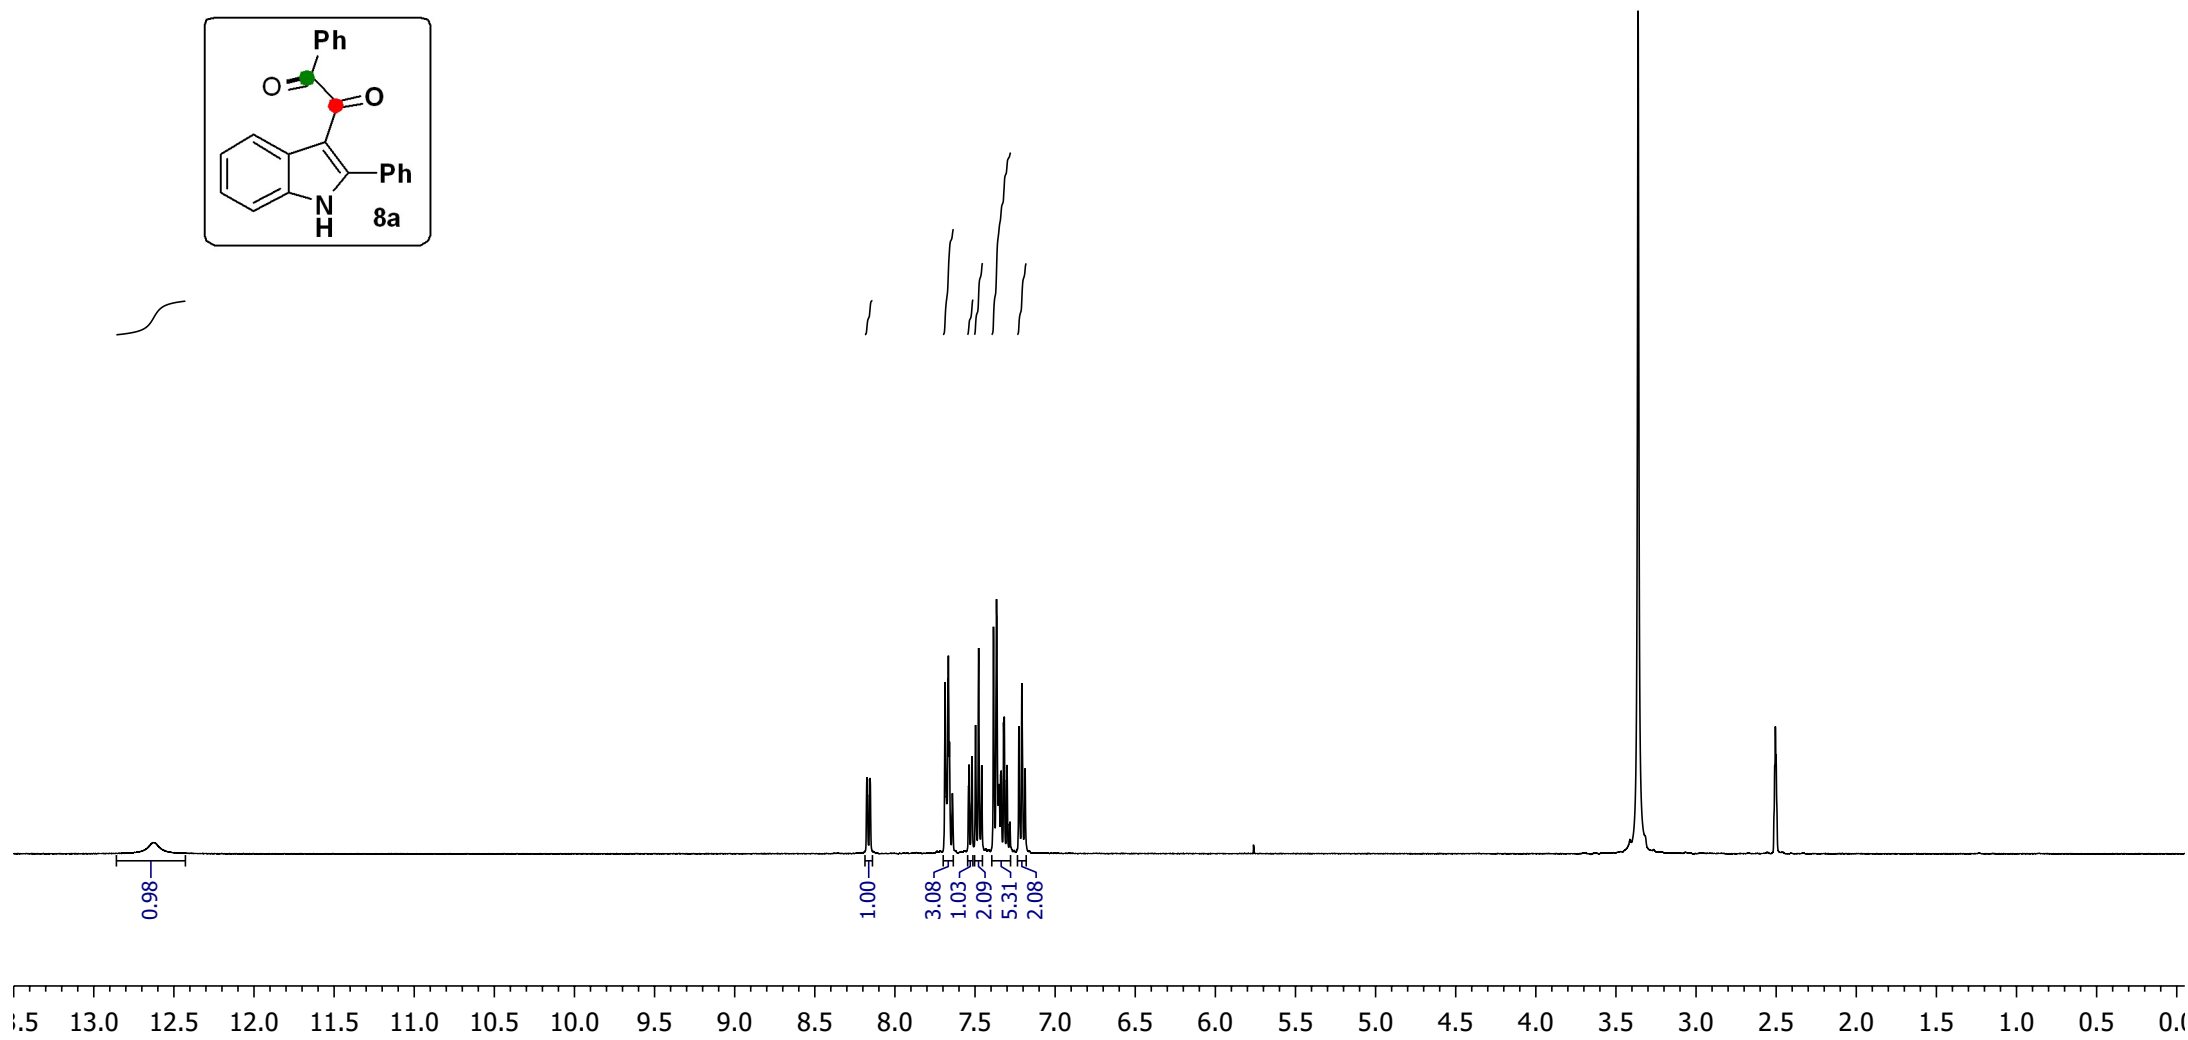

U0366-2  
MC-20-39-2

193.55  
190.33

148.70  
135.98  
134.21  
133.14  
130.45  
130.13  
129.70  
129.15  
128.83  
127.86  
126.80  
123.82  
122.88  
121.04  
112.27  
110.15

40.13  
39.92  
39.71  
39.50  
39.29  
39.09  
38.88

S101

Solvent DMSO-d<sub>6</sub>  
Spectrometer Frequency 100.66  
Nucleus <sup>13</sup>C

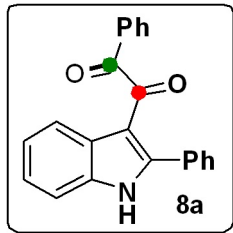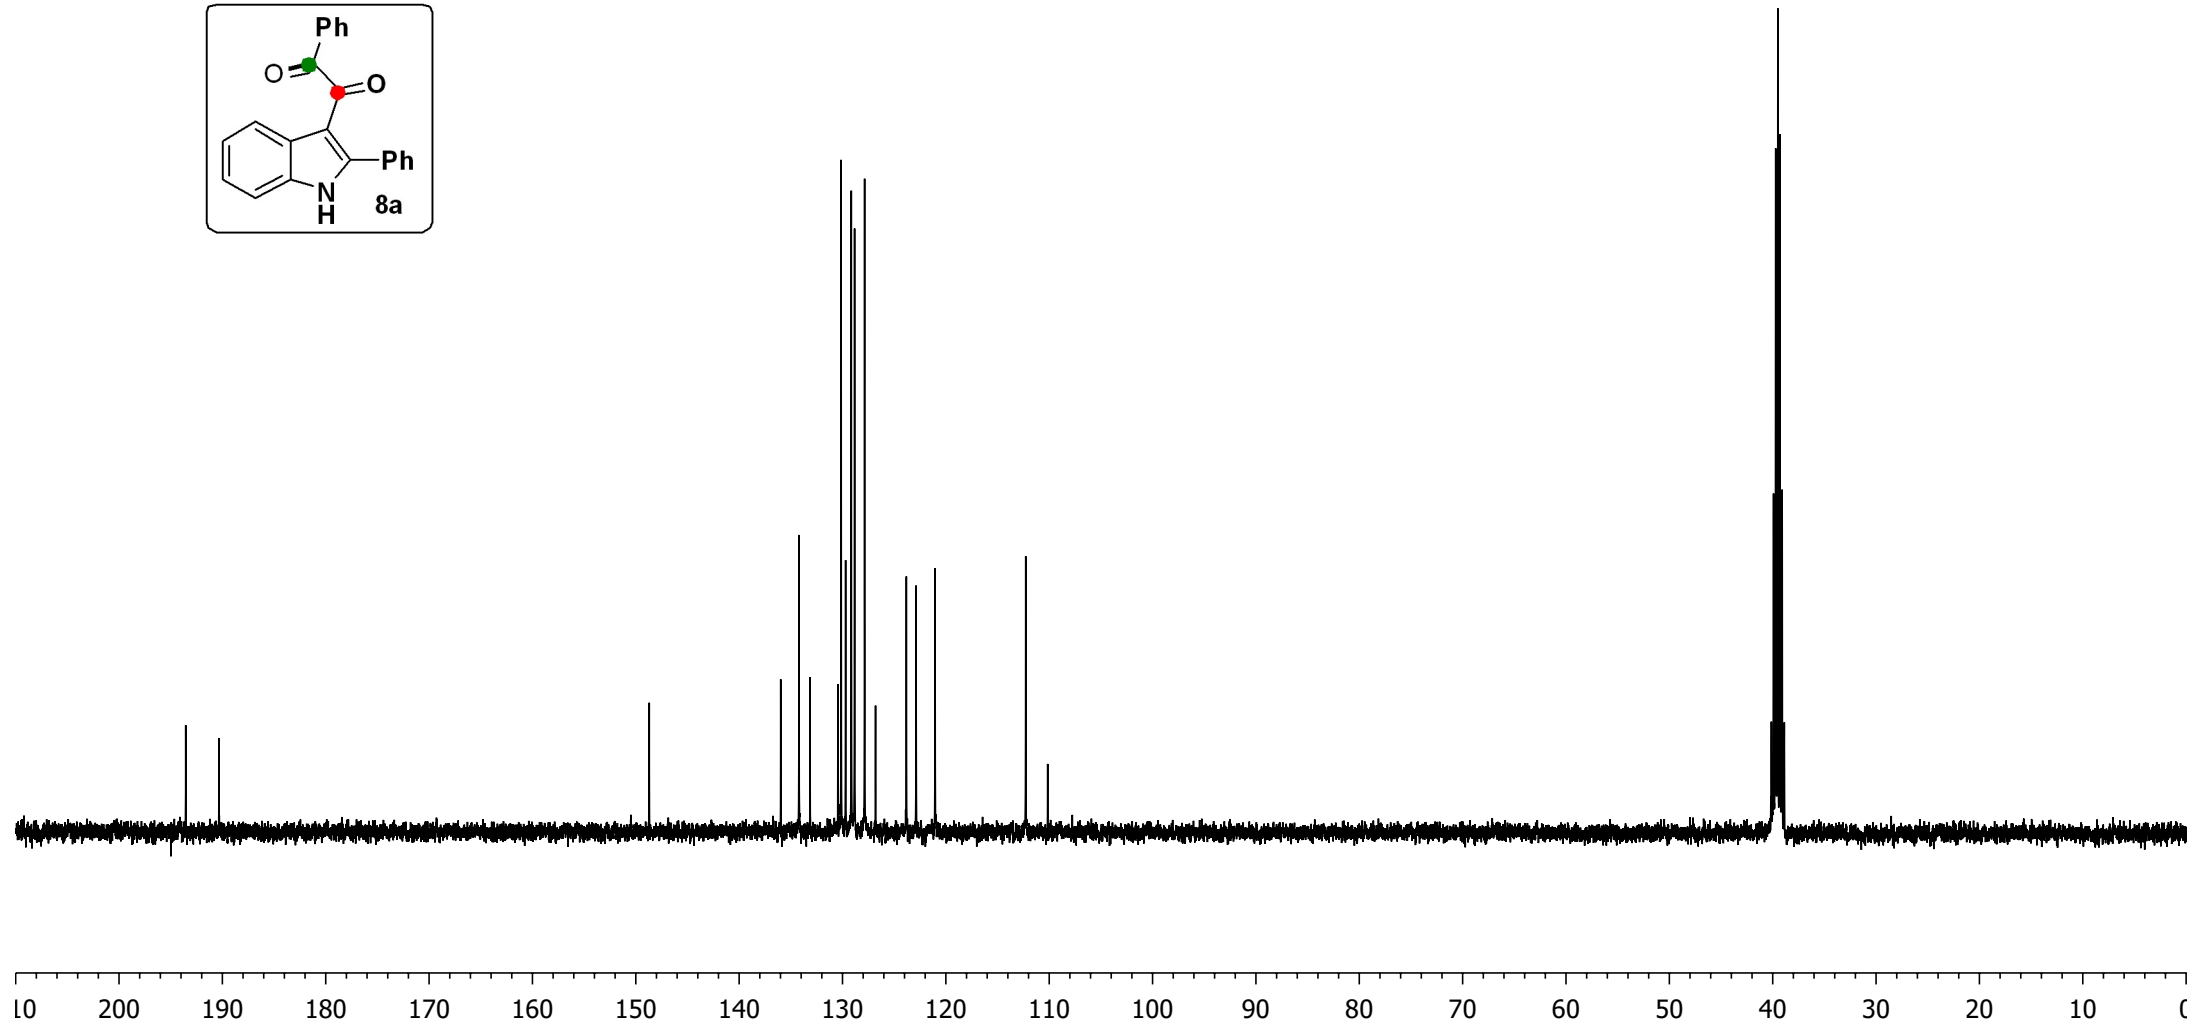

## checkCIF/PLATON report

Structure factors have been supplied for datablock(s) k11301-jjw-a\_auto

THIS REPORT IS FOR GUIDANCE ONLY. IF USED AS PART OF A REVIEW PROCEDURE FOR PUBLICATION, IT SHOULD NOT REPLACE THE EXPERTISE OF AN EXPERIENCED CRYSTALLOGRAPHIC REFEREE.

No syntax errors found.      CIF dictionary      Interpreting this report

### Datablock: k11301-jjw-a\_auto

---

Bond precision:      C-C = 0.0023 A

Wavelength=0.71073

Cell:                      a=10.0336(2)                      b=11.9429(2)                      c=13.2152(2)  
                                     alpha=87.388(1)                      beta=78.345(1)                      gamma=75.543(1)  
 Temperature:              130 K

|                        | Calculated      | Reported        |
|------------------------|-----------------|-----------------|
| Volume                 | 1501.80(5)      | 1501.80(5)      |
| Space group            | P -1            | P -1            |
| Hall group             | -P 1            | -P 1            |
| Moiety formula         | C36 H29 N O5 S2 | C36 H29 N O5 S2 |
| Sum formula            | C36 H29 N O5 S2 | C36 H29 N O5 S2 |
| Mr                     | 619.72          | 619.72          |
| Dx, g cm <sup>-3</sup> | 1.370           | 1.370           |
| Z                      | 2               | 2               |
| Mu (mm <sup>-1</sup> ) | 0.223           | 0.223           |
| F000                   | 648.0           | 648.0           |
| F000'                  | 648.78          |                 |
| h, k, lmax             | 12, 15, 17      | 12, 15, 16      |
| Nref                   | 6785            | 6361            |
| Tmin, Tmax             | 0.923, 0.956    | 0.815, 1.000    |
| Tmin'                  | 0.894           |                 |

Correction method= # Reported T Limits: Tmin=0.815 Tmax=1.000  
 AbsCorr = MULTI-SCAN

Data completeness= 0.938

Theta(max)= 27.346

R(reflections)= 0.0369( 5508)

wR2(reflections)=  
0.1010( 6361)

S = 1.095

Npar= 399

---

The following ALERTS were generated. Each ALERT has the format

**test-name\_ALERT\_alert-type\_alert-level.**

Click on the hyperlinks for more details of the test.

---

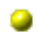

### Alert level C

PLAT911\_ALERT\_3\_C Missing FCF Refl Between Thmin & STh/L= 0.600 10 Report  
 -4 1 0, 4 2 1, 0 5 2, 1 11 9, 0 10 10, 1 10 10,  
 1 11 10, 2 11 10, 1 10 11, 2 10 11,

---

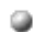

### Alert level G

PLAT154\_ALERT\_1\_G The s.u.'s on the Cell Angles are Equal ..(Note) 0.001 Degree  
 PLAT912\_ALERT\_4\_G Missing # of FCF Reflections Above STh/L= 0.600 409 Note  
 PLAT933\_ALERT\_2\_G Number of HKL-OMIT Records in Embedded .res File 5 Note  
 -4 1 0, 0 5 2, 0 10 10, 2 15 2, 4 2 1,  
 PLAT969\_ALERT\_5\_G The 'Henn et al.' R-Factor-gap value ..... 3.35 Note  
 Predicted wR2: Based on SigI\*\*2 3.02 or SHELX Weight 9.53  
 PLAT978\_ALERT\_2\_G Number C-C Bonds with Positive Residual Density. 16 Info

---

- 0 **ALERT level A** = Most likely a serious problem - resolve or explain  
 0 **ALERT level B** = A potentially serious problem, consider carefully  
 1 **ALERT level C** = Check. Ensure it is not caused by an omission or oversight  
 5 **ALERT level G** = General information/check it is not something unexpected

- 1 ALERT type 1 CIF construction/syntax error, inconsistent or missing data  
 2 ALERT type 2 Indicator that the structure model may be wrong or deficient  
 1 ALERT type 3 Indicator that the structure quality may be low  
 1 ALERT type 4 Improvement, methodology, query or suggestion  
 1 ALERT type 5 Informative message, check
-

It is advisable to attempt to resolve as many as possible of the alerts in all categories. Often the minor alerts point to easily fixed oversights, errors and omissions in your CIF or refinement strategy, so attention to these fine details can be worthwhile. In order to resolve some of the more serious problems it may be necessary to carry out additional measurements or structure refinements. However, the purpose of your study may justify the reported deviations and the more serious of these should normally be commented upon in the discussion or experimental section of a paper or in the "special\_details" fields of the CIF. checkCIF was carefully designed to identify outliers and unusual parameters, but every test has its limitations and alerts that are not important in a particular case may appear. Conversely, the absence of alerts does not guarantee there are no aspects of the results needing attention. It is up to the individual to critically assess their own results and, if necessary, seek expert advice.

### **Publication of your CIF in IUCr journals**

A basic structural check has been run on your CIF. These basic checks will be run on all CIFs submitted for publication in IUCr journals (*Acta Crystallographica*, *Journal of Applied Crystallography*, *Journal of Synchrotron Radiation*); however, if you intend to submit to *Acta Crystallographica Section C* or *E* or *IUCrData*, you should make sure that full publication checks are run on the final version of your CIF prior to submission.

### **Publication of your CIF in other journals**

Please refer to the *Notes for Authors* of the relevant journal for any special instructions relating to CIF submission.



Datablock k11301-jjw-a\_auto - ellipsoid plot

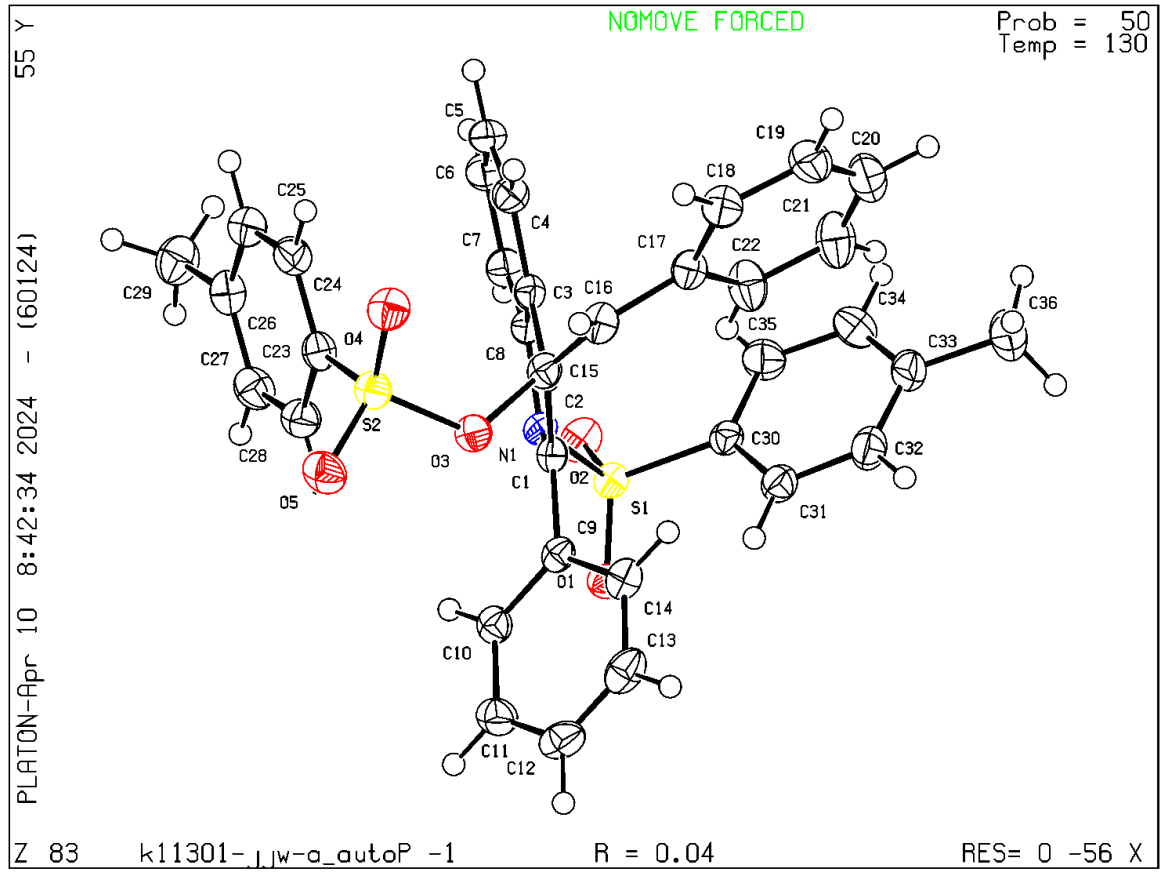

Table 1. Crystal data and structure refinement for d25047.

|                                   |                                                    |          |
|-----------------------------------|----------------------------------------------------|----------|
| Identification code               | d25047                                             |          |
| Empirical formula                 | C <sub>29</sub> H <sub>23</sub> N O <sub>3</sub> S |          |
| Formula weight                    | 465.54                                             |          |
| Temperature                       | 200(2) K                                           |          |
| Wavelength                        | 0.71073 Å                                          |          |
| Crystal system                    | Orthorhombic                                       |          |
| Space group                       | P b c n                                            |          |
| Unit cell dimensions              | a = 32.4449(14) Å                                  | α = 90°. |
|                                   | b = 8.4715(3) Å                                    | β = 90°. |
|                                   | c = 17.0615(7) Å                                   | γ = 90°. |
| Volume                            | 4689.5(3) Å <sup>3</sup>                           |          |
| Z                                 | 8                                                  |          |
| Density (calculated)              | 1.319 Mg/m <sup>3</sup>                            |          |
| Absorption coefficient            | 0.170 mm <sup>-1</sup>                             |          |
| F(000)                            | 1952                                               |          |
| Crystal size                      | 0.43 x 0.30 x 0.16 mm <sup>3</sup>                 |          |
| Theta range for data collection   | 2.39 to 25.41°.                                    |          |
| Index ranges                      | -39 ≤ h ≤ 37, -9 ≤ k ≤ 10, -20 ≤ l ≤ 18            |          |
| Reflections collected             | 26420                                              |          |
| Independent reflections           | 4300 [R(int) = 0.0660]                             |          |
| Completeness to theta = 25.41°    | 99.3 %                                             |          |
| Absorption correction             | None                                               |          |
| Max. and min. transmission        | 0.9733 and 0.9305                                  |          |
| Refinement method                 | Full-matrix least-squares on F <sup>2</sup>        |          |
| Data / restraints / parameters    | 4300 / 0 / 308                                     |          |
| Goodness-of-fit on F <sup>2</sup> | 1.039                                              |          |
| Final R indices [I > 2σ(I)]       | R1 = 0.0425, wR2 = 0.1180                          |          |
| R indices (all data)              | R1 = 0.0551, wR2 = 0.1296                          |          |
| Largest diff. peak and hole       | 0.196 and -0.371 e.Å <sup>-3</sup>                 |          |

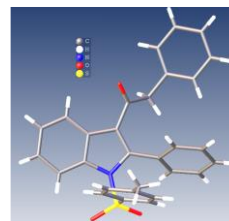

X-ray of 4a

Table 2. Atomic coordinates ( $\times 10^4$ ) and equivalent isotropic displacement parameters ( $\text{\AA}^2 \times 10^3$ ) for d25047.  $U(\text{eq})$  is defined as one third of the trace of the orthogonalized  $U^{ij}$  tensor.

|       | x       | y        | z       | $U(\text{eq})$ |
|-------|---------|----------|---------|----------------|
| C(1)  | 5701(1) | 1917(2)  | 5384(1) | 34(1)          |
| C(2)  | 5316(1) | 1729(3)  | 5034(1) | 45(1)          |
| C(3)  | 4987(1) | 2609(3)  | 5307(1) | 51(1)          |
| C(4)  | 5034(1) | 3666(3)  | 5923(1) | 46(1)          |
| C(5)  | 4673(1) | 4604(3)  | 6219(2) | 70(1)          |
| C(6)  | 5421(1) | 3816(3)  | 6261(1) | 48(1)          |
| C(7)  | 5755(1) | 2960(2)  | 5995(1) | 42(1)          |
| C(8)  | 6397(1) | 3171(2)  | 4093(1) | 33(1)          |
| C(9)  | 6617(1) | 4045(2)  | 4723(1) | 33(1)          |
| C(10) | 6456(1) | 5475(2)  | 4980(1) | 41(1)          |
| C(11) | 6664(1) | 6377(3)  | 5532(1) | 50(1)          |
| C(12) | 7037(1) | 5871(2)  | 5820(1) | 51(1)          |
| C(13) | 7202(1) | 4468(3)  | 5563(1) | 53(1)          |
| C(14) | 6992(1) | 3550(3)  | 5022(1) | 44(1)          |
| C(15) | 6301(1) | 3712(2)  | 3362(1) | 33(1)          |
| C(16) | 6419(1) | 5226(2)  | 2990(1) | 39(1)          |
| C(17) | 6862(1) | 5765(2)  | 3057(1) | 44(1)          |
| C(18) | 6929(1) | 7516(2)  | 2974(1) | 38(1)          |
| C(19) | 7052(1) | 8396(3)  | 3618(1) | 51(1)          |
| C(20) | 7120(1) | 10000(3) | 3543(2) | 63(1)          |
| C(21) | 7059(1) | 10740(3) | 2833(2) | 62(1)          |
| C(22) | 6935(1) | 9884(3)  | 2196(2) | 55(1)          |
| C(23) | 6872(1) | 8270(2)  | 2265(1) | 44(1)          |
| C(24) | 6059(1) | 2520(2)  | 2967(1) | 36(1)          |
| C(25) | 5889(1) | 2447(3)  | 2213(1) | 47(1)          |
| C(26) | 5678(1) | 1111(3)  | 2002(1) | 60(1)          |
| C(27) | 5639(1) | -148(3)  | 2513(1) | 67(1)          |
| C(28) | 5814(1) | -133(3)  | 3250(1) | 55(1)          |
| C(29) | 6020(1) | 1238(2)  | 3471(1) | 37(1)          |
| N(1)  | 6235(1) | 1618(2)  | 4175(1) | 35(1)          |
| O(1)  | 5980(1) | -769(2)  | 4869(1) | 48(1)          |

|      |         |         |         |       |
|------|---------|---------|---------|-------|
| O(2) | 6462(1) | 1020(2) | 5545(1) | 46(1) |
| O(3) | 6169(1) | 5922(2) | 2585(1) | 56(1) |
| S(1) | 6117(1) | 791(1)  | 5045(1) | 36(1) |

---

Table 3. Bond lengths [ $\text{\AA}$ ] and angles [ $^\circ$ ] for d25047.

---

|             |            |
|-------------|------------|
| C(1)-C(7)   | 1.378(3)   |
| C(1)-C(2)   | 1.395(3)   |
| C(1)-S(1)   | 1.7528(19) |
| C(2)-C(3)   | 1.382(3)   |
| C(2)-H(2)   | 0.9500     |
| C(3)-C(4)   | 1.389(3)   |
| C(3)-H(3)   | 0.9500     |
| C(4)-C(6)   | 1.388(3)   |
| C(4)-C(5)   | 1.505(3)   |
| C(5)-H(5A)  | 0.9800     |
| C(5)-H(5B)  | 0.9800     |
| C(5)-H(5C)  | 0.9800     |
| C(6)-C(7)   | 1.380(3)   |
| C(6)-H(6)   | 0.9500     |
| C(7)-H(7)   | 0.9500     |
| C(8)-C(15)  | 1.366(2)   |
| C(8)-N(1)   | 1.424(2)   |
| C(8)-C(9)   | 1.486(2)   |
| C(9)-C(14)  | 1.387(3)   |
| C(9)-C(10)  | 1.390(3)   |
| C(10)-C(11) | 1.389(3)   |
| C(10)-H(10) | 0.9500     |
| C(11)-C(12) | 1.376(3)   |
| C(11)-H(11) | 0.9500     |
| C(12)-C(13) | 1.374(3)   |
| C(12)-H(12) | 0.9500     |
| C(13)-C(14) | 1.385(3)   |
| C(13)-H(13) | 0.9500     |
| C(14)-H(14) | 0.9500     |
| C(15)-C(24) | 1.445(3)   |
| C(15)-C(16) | 1.481(3)   |
| C(16)-O(3)  | 1.217(2)   |
| C(16)-C(17) | 1.514(3)   |
| C(17)-C(18) | 1.506(3)   |

|                |            |
|----------------|------------|
| C(17)-H(17A)   | 0.9900     |
| C(17)-H(17B)   | 0.9900     |
| C(18)-C(23)    | 1.381(3)   |
| C(18)-C(19)    | 1.386(3)   |
| C(19)-C(20)    | 1.383(4)   |
| C(19)-H(19)    | 0.9500     |
| C(20)-C(21)    | 1.378(4)   |
| C(20)-H(20)    | 0.9500     |
| C(21)-C(22)    | 1.367(4)   |
| C(21)-H(21)    | 0.9500     |
| C(22)-C(23)    | 1.388(3)   |
| C(22)-H(22)    | 0.9500     |
| C(23)-H(23)    | 0.9500     |
| C(24)-C(29)    | 1.391(3)   |
| C(24)-C(25)    | 1.401(3)   |
| C(25)-C(26)    | 1.371(3)   |
| C(25)-H(25)    | 0.9500     |
| C(26)-C(27)    | 1.382(4)   |
| C(26)-H(26)    | 0.9500     |
| C(27)-C(28)    | 1.380(3)   |
| C(27)-H(27)    | 0.9500     |
| C(28)-C(29)    | 1.393(3)   |
| C(28)-H(28)    | 0.9500     |
| C(29)-N(1)     | 1.426(2)   |
| N(1)-S(1)      | 1.6840(15) |
| O(1)-S(1)      | 1.4269(14) |
| O(2)-S(1)      | 1.4193(14) |
|                |            |
| C(7)-C(1)-C(2) | 120.82(18) |
| C(7)-C(1)-S(1) | 120.02(14) |
| C(2)-C(1)-S(1) | 119.15(15) |
| C(3)-C(2)-C(1) | 118.98(19) |
| C(3)-C(2)-H(2) | 120.5      |
| C(1)-C(2)-H(2) | 120.5      |
| C(2)-C(3)-C(4) | 121.23(19) |
| C(2)-C(3)-H(3) | 119.4      |

|                   |            |
|-------------------|------------|
| C(4)-C(3)-H(3)    | 119.4      |
| C(3)-C(4)-C(6)    | 118.24(19) |
| C(3)-C(4)-C(5)    | 120.6(2)   |
| C(6)-C(4)-C(5)    | 121.2(2)   |
| C(4)-C(5)-H(5A)   | 109.5      |
| C(4)-C(5)-H(5B)   | 109.5      |
| H(5A)-C(5)-H(5B)  | 109.5      |
| C(4)-C(5)-H(5C)   | 109.5      |
| H(5A)-C(5)-H(5C)  | 109.5      |
| H(5B)-C(5)-H(5C)  | 109.5      |
| C(7)-C(6)-C(4)    | 121.68(19) |
| C(7)-C(6)-H(6)    | 119.2      |
| C(4)-C(6)-H(6)    | 119.2      |
| C(1)-C(7)-C(6)    | 119.04(18) |
| C(1)-C(7)-H(7)    | 120.5      |
| C(6)-C(7)-H(7)    | 120.5      |
| C(15)-C(8)-N(1)   | 108.35(15) |
| C(15)-C(8)-C(9)   | 127.09(17) |
| N(1)-C(8)-C(9)    | 124.51(15) |
| C(14)-C(9)-C(10)  | 118.52(18) |
| C(14)-C(9)-C(8)   | 122.45(17) |
| C(10)-C(9)-C(8)   | 118.84(17) |
| C(11)-C(10)-C(9)  | 120.73(19) |
| C(11)-C(10)-H(10) | 119.6      |
| C(9)-C(10)-H(10)  | 119.6      |
| C(12)-C(11)-C(10) | 119.9(2)   |
| C(12)-C(11)-H(11) | 120.0      |
| C(10)-C(11)-H(11) | 120.0      |
| C(11)-C(12)-C(13) | 119.86(19) |
| C(11)-C(12)-H(12) | 120.1      |
| C(13)-C(12)-H(12) | 120.1      |
| C(12)-C(13)-C(14) | 120.5(2)   |
| C(12)-C(13)-H(13) | 119.8      |
| C(14)-C(13)-H(13) | 119.8      |
| C(13)-C(14)-C(9)  | 120.5(2)   |
| C(13)-C(14)-H(14) | 119.8      |

|                     |            |
|---------------------|------------|
| C(9)-C(14)-H(14)    | 119.8      |
| C(8)-C(15)-C(24)    | 108.42(16) |
| C(8)-C(15)-C(16)    | 128.51(17) |
| C(24)-C(15)-C(16)   | 123.06(16) |
| O(3)-C(16)-C(15)    | 119.40(17) |
| O(3)-C(16)-C(17)    | 121.92(18) |
| C(15)-C(16)-C(17)   | 118.34(16) |
| C(18)-C(17)-C(16)   | 115.23(17) |
| C(18)-C(17)-H(17A)  | 108.5      |
| C(16)-C(17)-H(17A)  | 108.5      |
| C(18)-C(17)-H(17B)  | 108.5      |
| C(16)-C(17)-H(17B)  | 108.5      |
| H(17A)-C(17)-H(17B) | 107.5      |
| C(23)-C(18)-C(19)   | 118.98(19) |
| C(23)-C(18)-C(17)   | 121.22(18) |
| C(19)-C(18)-C(17)   | 119.79(19) |
| C(20)-C(19)-C(18)   | 120.1(2)   |
| C(20)-C(19)-H(19)   | 120.0      |
| C(18)-C(19)-H(19)   | 120.0      |
| C(21)-C(20)-C(19)   | 120.4(2)   |
| C(21)-C(20)-H(20)   | 119.8      |
| C(19)-C(20)-H(20)   | 119.8      |
| C(22)-C(21)-C(20)   | 120.0(2)   |
| C(22)-C(21)-H(21)   | 120.0      |
| C(20)-C(21)-H(21)   | 120.0      |
| C(21)-C(22)-C(23)   | 119.9(2)   |
| C(21)-C(22)-H(22)   | 120.0      |
| C(23)-C(22)-H(22)   | 120.0      |
| C(18)-C(23)-C(22)   | 120.6(2)   |
| C(18)-C(23)-H(23)   | 119.7      |
| C(22)-C(23)-H(23)   | 119.7      |
| C(29)-C(24)-C(25)   | 119.84(19) |
| C(29)-C(24)-C(15)   | 107.84(16) |
| C(25)-C(24)-C(15)   | 132.28(19) |
| C(26)-C(25)-C(24)   | 118.3(2)   |
| C(26)-C(25)-H(25)   | 120.9      |



|                   |            |
|-------------------|------------|
| C(24)-C(25)-H(25) | 120.9      |
| C(25)-C(26)-C(27) | 121.1(2)   |
| C(25)-C(26)-H(26) | 119.4      |
| C(27)-C(26)-H(26) | 119.4      |
| C(26)-C(27)-C(28) | 122.0(2)   |
| C(26)-C(27)-H(27) | 119.0      |
| C(28)-C(27)-H(27) | 119.0      |
| C(27)-C(28)-C(29) | 116.9(2)   |
| C(27)-C(28)-H(28) | 121.6      |
| C(29)-C(28)-H(28) | 121.6      |
| C(24)-C(29)-C(28) | 121.82(18) |
| C(24)-C(29)-N(1)  | 107.50(16) |
| C(28)-C(29)-N(1)  | 130.64(19) |
| C(8)-N(1)-C(29)   | 107.86(15) |
| C(8)-N(1)-S(1)    | 123.66(12) |
| C(29)-N(1)-S(1)   | 122.52(13) |
| O(2)-S(1)-O(1)    | 119.95(9)  |
| O(2)-S(1)-N(1)    | 107.12(8)  |
| O(1)-S(1)-N(1)    | 105.72(8)  |
| O(2)-S(1)-C(1)    | 109.52(9)  |
| O(1)-S(1)-C(1)    | 109.41(9)  |
| N(1)-S(1)-C(1)    | 103.84(8)  |

---

Symmetry transformations used to generate equivalent atoms:

Table 4. Anisotropic displacement parameters ( $\text{\AA}^2 \times 10^3$ ) for d25047. The anisotropic displacement factor exponent takes the form:  $-2\pi^2 [ h^2 a^{*2} U^{11} + \dots + 2 h k a^* b^* U^{12} ]$

|       | U <sup>11</sup> | U <sup>22</sup> | U <sup>33</sup> | U <sup>23</sup> | U <sup>13</sup> | U <sup>12</sup> |
|-------|-----------------|-----------------|-----------------|-----------------|-----------------|-----------------|
| C(1)  | 35(1)           | 32(1)           | 36(1)           | 4(1)            | 2(1)            | -4(1)           |
| C(2)  | 41(1)           | 45(1)           | 48(1)           | -7(1)           | -2(1)           | -5(1)           |
| C(3)  | 35(1)           | 58(1)           | 61(1)           | -2(1)           | -2(1)           | -4(1)           |
| C(4)  | 42(1)           | 42(1)           | 55(1)           | 3(1)            | 12(1)           | -1(1)           |
| C(5)  | 52(2)           | 69(2)           | 88(2)           | -4(2)           | 21(1)           | 8(1)            |
| C(6)  | 48(1)           | 48(1)           | 48(1)           | -8(1)           | 8(1)            | -4(1)           |
| C(7)  | 39(1)           | 47(1)           | 40(1)           | -5(1)           | -1(1)           | -4(1)           |
| C(8)  | 29(1)           | 31(1)           | 38(1)           | -2(1)           | 2(1)            | 2(1)            |
| C(9)  | 34(1)           | 30(1)           | 34(1)           | 0(1)            | 1(1)            | 0(1)            |
| C(10) | 42(1)           | 38(1)           | 43(1)           | -2(1)           | -1(1)           | 3(1)            |
| C(11) | 67(2)           | 34(1)           | 47(1)           | -8(1)           | -1(1)           | 0(1)            |
| C(12) | 68(2)           | 41(1)           | 43(1)           | -1(1)           | -14(1)          | -13(1)          |
| C(13) | 53(1)           | 48(1)           | 58(1)           | 0(1)            | -20(1)          | -3(1)           |
| C(14) | 43(1)           | 38(1)           | 52(1)           | -5(1)           | -9(1)           | 3(1)            |
| C(15) | 30(1)           | 33(1)           | 37(1)           | 0(1)            | -1(1)           | 2(1)            |
| C(16) | 37(1)           | 42(1)           | 37(1)           | 4(1)            | -2(1)           | 2(1)            |
| C(17) | 36(1)           | 46(1)           | 48(1)           | 9(1)            | -1(1)           | -1(1)           |
| C(18) | 29(1)           | 42(1)           | 42(1)           | 1(1)            | 3(1)            | -2(1)           |
| C(19) | 40(1)           | 70(2)           | 43(1)           | -9(1)           | 2(1)            | -2(1)           |
| C(20) | 44(1)           | 65(2)           | 80(2)           | -38(2)          | 5(1)            | -1(1)           |
| C(21) | 38(1)           | 36(1)           | 114(2)          | -7(1)           | 6(1)            | 2(1)            |
| C(22) | 45(1)           | 44(1)           | 75(2)           | 13(1)           | -3(1)           | -5(1)           |
| C(23) | 44(1)           | 45(1)           | 44(1)           | 3(1)            | -1(1)           | -7(1)           |
| C(24) | 31(1)           | 39(1)           | 37(1)           | -6(1)           | 1(1)            | 4(1)            |
| C(25) | 50(1)           | 52(1)           | 39(1)           | -6(1)           | -3(1)           | 8(1)            |
| C(26) | 68(2)           | 67(2)           | 44(1)           | -19(1)          | -12(1)          | -3(1)           |
| C(27) | 84(2)           | 58(2)           | 58(1)           | -22(1)          | -7(1)           | -20(1)          |
| C(28) | 72(2)           | 43(1)           | 49(1)           | -11(1)          | 0(1)            | -13(1)          |
| C(29) | 40(1)           | 36(1)           | 36(1)           | -8(1)           | 4(1)            | 0(1)            |
| N(1)  | 38(1)           | 30(1)           | 37(1)           | -2(1)           | 0(1)            | -2(1)           |
| O(1)  | 58(1)           | 28(1)           | 59(1)           | 3(1)            | 2(1)            | -1(1)           |

|      |       |       |       |       |        |       |
|------|-------|-------|-------|-------|--------|-------|
| O(2) | 42(1) | 49(1) | 46(1) | 9(1)  | -9(1)  | 5(1)  |
| O(3) | 45(1) | 58(1) | 66(1) | 25(1) | -17(1) | -6(1) |
| S(1) | 39(1) | 31(1) | 39(1) | 4(1)  | 0(1)   | 2(1)  |

---

Table 5. Hydrogen coordinates ( $\times 10^4$ ) and isotropic displacement parameters ( $\text{\AA}^2 \times 10^3$ ) for d25047.

|        | x    | y     | z    | U(eq) |
|--------|------|-------|------|-------|
| H(2)   | 5279 | 1007  | 4613 | 53    |
| H(3)   | 4724 | 2490  | 5069 | 62    |
| H(5A)  | 4772 | 5492  | 6535 | 105   |
| H(5B)  | 4497 | 3924  | 6542 | 105   |
| H(5C)  | 4513 | 5005  | 5774 | 105   |
| H(6)   | 5457 | 4525  | 6687 | 57    |
| H(7)   | 6019 | 3089  | 6229 | 50    |
| H(10)  | 6200 | 5839  | 4776 | 49    |
| H(11)  | 6549 | 7343  | 5711 | 59    |
| H(12)  | 7181 | 6489  | 6196 | 61    |
| H(13)  | 7461 | 4126  | 5758 | 63    |
| H(14)  | 7107 | 2575  | 4855 | 53    |
| H(17A) | 6970 | 5428  | 3573 | 52    |
| H(17B) | 7026 | 5219  | 2649 | 52    |
| H(19)  | 7090 | 7897  | 4111 | 61    |
| H(20)  | 7209 | 10595 | 3983 | 76    |
| H(21)  | 7103 | 11845 | 2787 | 75    |
| H(22)  | 6893 | 10394 | 1706 | 65    |
| H(23)  | 6788 | 7678  | 1820 | 53    |
| H(25)  | 5918 | 3302  | 1857 | 56    |
| H(26)  | 5556 | 1048  | 1497 | 72    |
| H(27)  | 5487 | -1050 | 2351 | 80    |
| H(28)  | 5795 | -1018 | 3590 | 66    |
